# Supplementary material for: Balancing selection on genomic deletion polymorphisms in humans
Source: eLife. 2023 Jan 10;12:e79111. doi: 10.7554/eLife.79111 (PMC9943071; doi:10.7554/eLife.79111)
Supplement: Supplementary file 1. [file elife-79111-supp1.csv]

CHR	START	END	ESV	SIZE	GENE:NUMBER_OF_EXONS	AFR_AF	EUR_AF	EAS_AF	SAS_AF	ALTAI_MODZ	VINDIJA_MODZ	CHAGYRSKAYA_MODZ	DENISOVAN_MODZ	ALTAI_DELETION	VINDIJA_DELETION	CHAGYRSKAYA_DELETION	DENISOVAN_DELETION
1	738570	742020	esv3584979	3450	NONE	0	0	0.001	0	1.624722078	1.022620004	1.387632897	14.45877237	NO	NO	NO	NO
1	766600	769112	esv3584980	2512	NONE	0.0151	0.001	0.0923	0.0317	0.759698164	2.550798378	1.27977159	1.067295961	NO	NO	NO	NO
1	775292	791968	esv3584983	16676	LINC01128:5	0	0.005	0.001	0	0.900079908	1.070884825	1.098652871	1.539595489	NO	NO	NO	NO
1	794496	799549	esv3584984	5053	LINC01128:1	0	0	0.001	0	0.428096294	1.304259307	0.680166059	-0.462076082	NO	NO	NO	NO
1	873391	874042	esv3584987	651	NONE	0	0	0.0069	0	-2.932552932	-4.353558131	-6.116160497	-8.213799301	NO	NO	YES	YES
1	947113	948003	esv3584988	890	NONE	0.003	0	0	0	1.251442046	5.227646347	4.094145405	2.492749806	NO	NO	NO	NO
1	1142714	1143140	esv3584990	426	NONE	0.0174	0.1252	0.5923	0.2086	-3.666830523	-1.737047456	-0.449528969	-5.462750964	NO	NO	NO	YES
1	1388953	1410796	esv3584995	21843	ATAD3C:9|ATAD3B:1	0.0098	0.0129	0.002	0.0102	-1.91971112	-0.845573542	-2.021371156	-3.008222761	NO	NO	NO	NO
1	1392382	1423433	esv3584996	31051	ATAD3B:13|ATAD3C:5	0.0083	0.0129	0.002	0.0102	-1.84282555	-0.831108599	-2.092182453	-3.069787824	NO	NO	NO	NO
1	1400225	1409107	esv3584999	8882	ATAD3B:1|ATAD3C:1	0.0053	0.0119	0.002	0.0092	-1.623465303	0.152157818	-1.92631676	-2.605449624	NO	NO	NO	NO
1	1424924	1462190	esv3585000	37266	ATAD3A:15|ATAD3B:3	0	0	0	0.001	-1.436578526	-0.255472976	-1.860219104	-2.627846606	NO	NO	NO	NO
1	1438168	1449503	esv3585001	11335	ATAD3A:2	0.0015	0.002	0	0.002	-1.756265568	0.063074664	-2.342961634	-2.947982624	NO	NO	NO	NO
1	1441334	1443842	esv3585002	2508	NONE	0.0015	0.002	0	0.002	-0.412841141	3.175309427	0.130239605	0.604802328	NO	NO	NO	NO
1	1443538	1445747	esv3585003	2209	NONE	0.0787	0.001	0.001	0.002	-1.869181687	-0.694651503	-1.7650663	-4.476582644	NO	NO	NO	NO
1	1519512	1520127	esv3585005	615	NONE	0.0091	0	0	0	3.821516257	6.832929737	3.180694312	2.478841074	NO	NO	NO	NO
1	1522876	1524674	esv3585006	1798	NONE	0.0219	0	0	0	1.042804538	1.475174076	-0.303339185	-0.713361491	NO	NO	NO	NO
1	1582548	1645946	esv3585007	63398	CDK11A:17|SLC35E2B:10|MMP23A:6|CDK11A/gCDK11B:1	0	0	0.001	0.001	-5.061775136	0.733364246	-0.929923045	-1.581213661	YES	NO	NO	NO
1	1601719	1682577	esv3585010	80858	CDK11A:19|SLC35E2A:8|MMP23A:6|SLC35E2B:6|CDK11A/gCDK11B:5|CDK11B:5	0.0008	0	0	0.002	-4.297887649	0.799817315	-0.871821134	-1.066009631	NO	NO	NO	NO
1	1626665	1681048	esv3585013	54383	CDK11A:19|SLC35E2A:8|MMP23A:6|CDK11A/gCDK11B:5|CDK11B:5	0.0151	0.0239	0.0198	0.0419	-3.411141505	0.918524977	-0.585671141	-0.382147984	NO	NO	NO	NO
1	1649047	1650523	esv3585016	1476	NONE	0.0045	0.0179	0.0179	0.0215	0.023712089	1.434615345	1.898376636	14.99877385	NO	NO	NO	NO
1	1649620	1650651	esv3585017	1031	NONE	0.0038	0.0179	0.0179	0.0215	-0.756260119	2.272917903	2.266503823	12.74053856	NO	NO	NO	NO
1	1772216	1773658	esv3585018	1442	NONE	0	0.001	0	0	-1.281858584	0.895401277	-0.039719865	-0.026642487	NO	NO	NO	NO
1	1922946	1924578	esv3585019	1632	NONE	0.0008	0.001	0	0.001	0.014538294	1.410558686	0.521968702	0.851492535	NO	NO	NO	NO
1	2024547	2027383	esv3585020	2836	NONE	0.0144	0	0	0	-3.435143324	-3.670275304	-4.898810099	-8.216859368	NO	NO	NO	YES
1	2162106	2163200	esv3585023	1094	NONE	0.0008	0	0	0	-1.899700228	-0.798489846	-3.369763594	-3.691666168	NO	NO	NO	NO
1	2303828	2320328	esv3585024	16500	MORN1:8	0	0	0	0.0051	-2.826541981	-1.47773496	-2.704874805	-4.52327905	NO	NO	NO	NO
1	2372200	2374164	esv3585025	1964	NONE	0	0	0.001	0	-2.519000695	-1.695581798	-2.859246034	-4.298632438	NO	NO	NO	NO
1	2524546	2527727	esv3585029	3181	MMEL1:5	0	0	0	0.001	-3.885565871	-4.363785904	-5.095984753	-7.359761905	NO	NO	YES	YES
1	2693016	2697186	esv3585032	4170	NONE	0	0	0.001	0	-0.055274942	-0.644175165	-1.025658615	5.313162556	NO	NO	NO	NO
1	2848661	2850131	esv3585034	1470	NONE	0	0	0	0.001	-2.297298375	-2.698944075	-1.952602509	-4.131369639	NO	NO	NO	NO
1	2918659	2919946	esv3585035	1287	NONE	0	0	0	0	-6.203475057	-6.226759267	-4.993555695	-7.553263912	YES	YES	NO	YES
1	3209922	3212186	esv3585041	2264	NONE	0	0	0.002	0	-2.728493706	-2.595083162	-2.505560261	-3.566745266	NO	NO	NO	NO
1	3508964	3515259	esv3585043	6295	MEGF6:1	0.0008	0	0	0	-3.26385947	-3.50733433	-4.095005685	-6.301491146	NO	NO	NO	YES
1	3670490	3671676	esv3585047	1186	CCDC27:1	0.0061	0	0	0	-3.045893408	-1.875638224	-3.177423212	-5.287802443	NO	NO	NO	YES
1	4075955	4077963	esv3585057	2008	NONE	0	0	0	0.001	-0.103064635	-0.035731315	0.122118536	-0.879831851	NO	NO	NO	NO
1	4194291	4196163	esv3585059	1872	NONE	0	0	0	0	-0.849393224	0.719067702	1.480623197	0.642489603	NO	NO	NO	NO
1	4232074	4233113	esv3585061	1039	NONE	0.0015	0	0	0	-2.084828878	-2.758018902	-2.923961883	-2.77892307	NO	NO	NO	NO
1	4284510	4285952	esv3585063	1442	NONE	0.0136	0	0	0	-1.179694322	-0.632143041	-0.567494524	1.779479801	NO	NO	NO	NO
1	4289375	4295838	esv3585065	6463	NONE	0	0	0.001	0	0.063374677	-0.026624593	-0.072359388	-0.010391062	NO	NO	NO	NO
1	4364598	4366814	esv3585067	2216	NONE	0	0	0.001	0	-0.903479685	-1.746874445	-2.028318612	-2.444619421	NO	NO	NO	NO
1	4410747	4419657	esv3585068	8910	NONE	0	0.001	0	0	-2.091673755	-2.318801613	-2.131997549	-2.132322545	NO	NO	NO	NO
1	4418628	4430107	esv3585069	11479	NONE	0	0.001	0	0	-1.704042674	-1.53535901	-1.148393077	-1.050528537	NO	NO	NO	NO
1	4525729	4531357	esv3585070	5628	NONE	0.0015	0	0	0	-1.339802494	-1.609730482	-0.4518476	-1.386729294	NO	NO	NO	NO
1	4561018	4564867	esv3585074	3849	NONE	0	0	0.001	0	-0.847882768	-1.561115254	-0.150637975	-0.572612135	NO	NO	NO	NO
1	4709787	4714215	esv3585075	4428	NONE	0	0	0	0.001	-1.997458329	1.391566586	-1.509180826	-3.496992695	NO	NO	NO	NO
1	4823184	4829674	esv3585076	6490	NONE	0	0	0	0	-1.546356192	-1.259016486	-1.130428231	-0.288940166	NO	NO	NO	NO
1	4882232	4883040	esv3585077	808	NONE	0	0.005	0.006	0.089	-11.80727479	-11.26412925	-12.15025119	-1.476286031	YES	YES	YES	NO
1	4899296	4900544	esv3585078	1248	NONE	0	0	0.001	0	-0.765777615	0.945349641	1.365730223	1.231097257	NO	NO	NO	NO
1	4903380	4919300	esv3585079	15920	NONE	0	0	0	0	-0.52715058	-0.274355494	-0.201459678	-0.412110314	NO	NO	NO	NO
1	5028066	5056207	esv3585080	28141	NONE	0.0008	0	0	0	-1.085058234	-0.661061151	-0.591084614	-0.887606215	NO	NO	NO	NO
1	5063288	5063889	esv3585082	601	NONE	0	0	0	0.0225	0.662725953	2.151402254	0.832675647	1.123561283	NO	NO	NO	NO
1	5163652	5165101	esv3585084	1449	NONE	0	0	0.001	0	0.319270097	1.032559543	0.896661681	0.73661365	NO	NO	NO	NO
1	5165240	5166206	esv3585085	966	NONE	0.0227	0	0	0	2.28278578	0.696369234	0.394272529	2.091574511	NO	NO	NO	NO
1	5172414	5173475	esv3585086	1061	NONE	0	0	0.0179	0	0.38323353	-1.31502778	-2.190937418	-1.614584469	NO	NO	NO	NO
1	5173809	5179107	esv3585087	5298	NONE	0	0	0.004	0	-0.14979834	-0.372018705	-0.975918496	5.593750775	NO	NO	NO	NO
1	5238714	5239827	esv3585088	1113	NONE	0	0	0.001	0	-0.195078213	-0.608402179	2.629171783	0.394873426	NO	NO	NO	NO
1	5302073	5304597	esv3585089	2524	NONE	0.0091	0	0	0	-2.946136272	-1.039494399	-1.494436724	-2.14185102	NO	NO	NO	NO
1	5359262	5362142	esv3585090	2880	NONE	0.0091	0	0	0	-1.110077181	-1.070822435	0.301644529	0.278623054	NO	NO	NO	NO
1	5403433	5404651	esv3585092	1218	NONE	0.0008	0	0	0	-3.436849292	-2.534989195	-1.565281396	-0.791888995	NO	NO	NO	NO
1	5406463	5408838	esv3585093	2375	NONE	0	0	0.001	0	-1.214940992	-1.060418229	-0.307360795	0.194151941	NO	NO	NO	NO
1	5409220	5411126	esv3585094	1906	NONE	0	0	0.001	0	-2.454724146	-1.171573696	-1.403135726	-0.38912069	NO	NO	NO	NO
1	5644653	5645445	esv3585095	792	NONE	0.0076	0.001	0	0	-0.708990543	0.191419363	2.012505354	2.529925717	NO	NO	NO	NO
1	5668174	5671379	esv3585096	3205	NONE	0.0008	0	0	0	1.223552594	0.573573004	1.092344785	1.025689798	NO	NO	NO	NO
1	5725069	5727357	esv3585097	2288	NONE	0	0	0.001	0	4.206891842	1.386599422	1.956264039	7.649352948	NO	NO	NO	NO
1	5738969	5746950	esv3585098	7981	NONE	0	0	0.001	0	-1.730222533	-1.653508776	-1.975459062	-1.102381337	NO	NO	NO	NO
1	6031428	6041299	esv3585100	9871	NPHP4:1	0.0015	0.002	0	0	-2.041615369	-0.838159395	-1.288678615	-2.412413448	NO	NO	NO	NO
1	6362136	6367625	esv3585102	5489	NONE	0	0	0	0.002	-1.047463819	-1.045484134	-2.225703664	-0.549032676	NO	NO	NO	NO
1	6434482	6445321	esv3585104	10839	NONE	0.0008	0.0099	0.002	0.0072	-0.302731386	1.010049491	0.763868534	-0.066013741	NO	NO	NO	NO
1	6436514	6438135	esv3585105	1621	NONE	0.0008	0	0	0	0.692232588	1.61336994	1.438369102	2.892739536	NO	NO	NO	NO
1	6438160	6445897	esv3585106	7737	ACOT7:1	0.0008	0.0169	0.001	0.0092	-0.533365394	0.699514802	0.475663503	-1.009703387	NO	NO	NO	NO
1	6458634	6459611	esv3585107	977	NONE	0.059	0	0	0	-1.317477521	0.237842217	-0.548986828	0.290299908	NO	NO	NO	NO
1	6621091	6626994	esv3585108	5903	NONE	0	0	0	0.0041	-1.770732232	-1.508678561	-2.185294951	-0.966977454	NO	NO	NO	NO
1	6724320	6725187	esv3585109	867	NONE	0	0.001	0	0	-0.604077655	2.439632569	1.220867829	3.953652987	NO	NO	NO	NO
1	6861163	6861821	esv3585114	658	NONE	0.0015	0	0	0	0.582910914	2.377631779	2.095301949	0.922236817	NO	NO	NO	NO
1	7116417	7119267	esv3585117	2850	NONE	0	0	0	0.001	-1.479860093	-0.870169903	-1.554300285	-1.762859799	NO	NO	NO	NO
1	7189807	7198688	esv3585118	8881	NONE	0.0008	0	0	0	-0.135290214	-0.020448224	0.176438226	-0.492088991	NO	NO	NO	NO
1	7196138	7197576	esv3585119	1438	NONE	0	0	0	0	0.406817915	-1.186688858	-0.782695861	0.083189535	NO	NO	NO	NO
1	7352610	7374350	esv3585122	21740	NONE	0.0008	0	0	0	-0.196604141	0.344424333	0.357431568	-0.692720857	NO	NO	NO	NO
1	7483051	7486289	esv3585124	3238	NONE	0.0038	0	0	0	-2.428358996	-1.154984221	-3.048901412	-2.301599693	NO	NO	NO	NO
1	7570074	7571521	esv3585126	1447	NONE	0.0658	0.1928	0.2857	0.1646	-0.754754182	-0.909325625	-0.86613496	-0.869185909	NO	NO	NO	NO
1	7645725	7648453	esv3585127	2728	NONE	0.0113	0	0	0	-2.836118557	-3.445548528	-4.21530029	-5.053839036	NO	NO	NO	YES
1	7740841	7743843	esv3585129	3002	NONE	0	0	0	0.0041	-3.070192604	-2.877918139	-3.693523256	-3.874378086	NO	NO	NO	NO
1	7803121	7804431	esv3585130	1310	NONE	0.0076	0	0	0	0.933019726	2.157374435	1.740525541	-0.11602592	NO	NO	NO	NO
1	7908795	7909513	esv3585131	718	NONE	0	0.003	0	0.002	0.863555349	1.351995303	-1.06356563	-0.447619523	NO	NO	NO	NO
1	7975281	7978202	esv3585133	2921	TNFRSF9:1	0	0.001	0	0	0.24061539	1.211531105	0.03015727	0.646036161	NO	NO	NO	NO
1	8095411	8103255	esv3585135	7844	NONE	0.0008	0	0	0	0.126328723	0.414440979	-0.513339786	0.347440841	NO	NO	NO	NO
1	8110264	8113874	esv3585136	3610	NONE	0.0015	0	0	0	0.013413043	1.688638799	0.009415364	1.078536557	NO	NO	NO	NO
1	8182402	8190870	esv3585139	8468	NONE	0.034	0	0	0	-0.840810711	0.731194148	-0.521405968	0.069507717	NO	NO	NO	NO
1	8185308	8186282	esv3585140	974	NONE	0.025	0	0	0	0.367926424	-0.634465362	-0.710781974	0.556873945	NO	NO	NO	NO
1	8247757	8250067	esv3585142	2310	NONE	0.031	0	0	0	-0.08452439	0.643748142	-0.532448617	-0.778730332	NO	NO	NO	NO
1	8283918	8289540	esv3585143	5622	NONE	0.0008	0	0	0	-0.942546755	-0.090560382	-1.190541761	-1.353168458	NO	NO	NO	NO
1	8338196	8338929	esv3585144	733	NONE	0.0008	0	0	0	-0.103502535	0.565594215	1.195615314	1.622806416	NO	NO	NO	NO
1	8360182	8364098	esv3585145	3916	NONE	0.0015	0	0.004	0.001	-1.03398763	0.702830413	-0.754314611	0.771743887	NO	NO	NO	NO
1	8447277	8475460	esv3585147	28183	NONE	0	0	0	0	-0.346399726	0.409389512	-0.991765068	-0.116307007	NO	NO	NO	NO
1	8550232	8551315	esv3585149	1083	NONE	0.1369	0	0	0	1.033640647	2.650832226	-0.601649759	-0.312563742	NO	NO	NO	NO
1	8765907	8775376	esv3585150	9469	NONE	0.0008	0	0	0	0.160639784	1.15976068	0.681622493	0.203543211	NO	NO	NO	NO
1	8902400	8903006	esv3585152	606	NONE	0	0.001	0	0	2.786546557	3.773313773	3.274983682	4.325658289	NO	NO	NO	NO
1	8924066	8925394	esv3585154	1328	ENO1:2	0	0	0.001	0	-1.480628849	0.005189079	-1.31599317	0.466358594	NO	NO	NO	NO
1	8977136	8978028	esv3585157	892	NONE	0.0015	0	0	0	0.390394005	3.856928481	1.122588315	-0.61103114	NO	NO	NO	NO
1	8998691	9000106	esv3585158	1415	NONE	0	0.004	0	0	-0.71779814	-0.110363548	1.025510861	-0.589952342	NO	NO	NO	NO
1	9001741	9002484	esv3585159	743	NONE	0	0	0	0.001	-0.668683945	1.465265135	-0.748412304	1.392750107	NO	NO	NO	NO
1	9006369	9012990	esv3585160	6621	CA6:1	0.0061	0	0	0	-0.867609967	-0.616257187	-1.448945404	-0.432574625	NO	NO	NO	NO
1	9134134	9136900	esv3585162	2766	NONE	0	0.006	0	0	0.066526845	2.111536071	1.030828612	0.991452343	NO	NO	NO	NO
1	9170160	9181131	esv3585164	10971	GPR157:1	0	0	0.001	0.002	-1.453493101	-0.126593754	-1.623901388	-1.906525248	NO	NO	NO	NO
1	9171841	9176285	esv3585165	4444	NONE	0	0	0.001	0.002	-1.84347466	-0.6765175	-1.927155063	-0.588187328	NO	NO	NO	NO
1	9215067	9215937	esv3585166	870	NONE	0.0008	0	0	0	-1.032906589	5.794415535	2.993309573	0.464763305	NO	NO	NO	NO
1	9288533	9290834	esv3585167	2301	NONE	0	0.001	0	0	-0.492422099	3.394372218	0.642668445	0.165073472	NO	NO	NO	NO
1	9452693	9454546	esv3585170	1853	NONE	0.0008	0	0	0	-2.120888789	-0.579708809	-0.680036256	-1.270301901	NO	NO	NO	NO
1	9453882	9456588	esv3585171	2706	NONE	0	0	0.001	0	-1.312392711	-0.471270626	-0.025507482	-0.420397477	NO	NO	NO	NO
1	9495904	9497610	esv3585172	1706	NONE	0	0.001	0	0	-0.084991677	1.837598161	0.46535018	0.979632625	NO	NO	NO	NO
1	9499638	9503787	esv3585173	4149	NONE	0	0.001	0	0	-1.549067131	-0.474066404	-1.006839398	-0.500600157	NO	NO	NO	NO
1	9517431	9520277	esv3585174	2846	NONE	0	0	0.001	0	-0.581606208	0.858645335	-0.199476153	-1.597175117	NO	NO	NO	NO
1	9579119	9582420	esv3585176	3301	NONE	0	0.003	0	0	-0.047442096	2.217069904	-0.434916539	-0.043965907	NO	NO	NO	NO
1	9595360	9597869	esv3585179	2509	NONE	0.3003	0.1352	0.3095	0.1585	-9.292046744	-7.898111989	-9.674298522	-11.34858227	YES	YES	YES	YES
1	9604082	9608570	esv3585180	4488	NONE	0	0	0	0	0.785937659	2.217550264	-0.609757808	0.101554305	NO	NO	NO	NO
1	9620016	9622208	esv3585181	2192	NONE	0	0	0	0	0.093607029	1.9908713	-0.264769445	0.063334043	NO	NO	NO	NO
1	9720878	9733089	esv3585184	12211	PIK3CD-AS2:1	0	0	0	0	-0.941858705	0.34701635	-1.087912174	-0.048528534	NO	NO	NO	NO
1	9730509	9736935	esv3585186	6426	PIK3CD-AS2:1	0	0	0.001	0	-1.297244433	-0.468975861	-2.5038681	-1.189013999	NO	NO	NO	NO
1	9822323	9825846	esv3585187	3523	NONE	0	0	0.002	0	-0.486072785	0.207511872	-0.663502107	0.391961126	NO	NO	NO	NO
1	9846036	9856679	esv3585188	10643	NONE	0.0008	0.003	0.0982	0.137	-0.631775711	0.773877767	-0.048751513	-0.67984316	NO	NO	NO	NO
1	9891824	9892736	esv3585189	912	NONE	0.0008	0	0	0	0.468264517	2.742504619	1.185715726	1.215889213	NO	NO	NO	NO
1	9975577	9980237	esv3585191	4660	NONE	0	0	0.001	0	-0.472804226	1.671365044	-0.450929104	0.61706212	NO	NO	NO	NO
1	10052713	10063234	esv3585192	10521	RBP7:1	0	0	0	0	-1.069874537	0.137248251	-1.057788006	-0.995047192	NO	NO	NO	NO
1	10067190	10068675	esv3585193	1485	RBP7:2	0.0091	0	0.001	0	0.146660951	1.118489609	0.61986325	1.838514412	NO	NO	NO	NO
1	10068048	10072196	esv3585194	4148	RBP7:1	0	0	0	0	0.558378883	1.106747361	0.14504884	1.445559529	NO	NO	NO	NO
1	10096652	10102949	esv3585195	6297	NONE	0	0.002	0	0	-0.281581305	1.629062837	0.389344158	0.617322923	NO	NO	NO	NO
1	10245266	10250945	esv3585196	5679	NONE	0.0008	0	0	0	-1.27940522	-0.851153236	-3.348747411	-0.991806133	NO	NO	NO	NO
1	10249536	10252077	esv3585197	2541	NONE	0.0635	0	0	0	0.303200242	1.505617844	-0.433480597	0.94320576	NO	NO	NO	NO
1	10254795	10257437	esv3585198	2642	NONE	0	0.004	0	0	0.233175166	1.733936202	-0.521323143	0.951185578	NO	NO	NO	NO
1	10369423	10378616	esv3585199	9193	NONE	0.0696	0	0	0	-0.24132202	0.831375467	-0.520173301	-0.364958878	NO	NO	NO	NO
1	10482499	10483790	esv3585200	1291	NONE	0.4092	0.3091	0.2837	0.2771	-1.250886827	-1.227772008	-0.306033397	-1.538090161	NO	NO	NO	NO
1	10543545	10545992	esv3585201	2447	NONE	0.0295	0	0	0	-1.055699598	0.949080935	-0.418579942	-0.532022881	NO	NO	NO	NO
1	10636627	10644066	esv3585202	7439	NONE	0	0	0.0704	0.0072	0.148851378	1.006367285	0.182754472	-0.986279538	NO	NO	NO	NO
1	10935132	10937045	esv3585204	1913	NONE	0.0008	0	0	0	-1.160648671	-1.082263098	-2.003458066	-0.605583515	NO	NO	NO	NO
1	10954251	10956119	esv3585205	1868	NONE	0	0.006	0	0.0143	-0.327309115	0.793953941	0.770220883	-0.215316965	NO	NO	NO	NO
1	10968337	10971432	esv3585206	3095	NONE	0	0.002	0	0	-3.026107051	-2.014056215	-3.207324238	-3.346370218	NO	NO	NO	NO
1	10981542	10986132	esv3585207	4590	NONE	0	0.004	0	0.002	-0.251257114	0.862601442	1.604215457	0.495767866	NO	NO	NO	NO
1	10996386	11005249	esv3585208	8863	NONE	0	0	0	0	-2.237942538	-1.747986264	-2.497354683	-2.573801769	NO	NO	NO	NO
1	11037040	11038122	esv3585209	1082	NONE	0	0.001	0	0	1.473460579	1.999819293	1.6433651	-0.405946144	NO	NO	NO	NO
1	11054703	11056117	esv3585210	1414	NONE	0.0053	0	0	0	1.310559568	2.400259292	0.685260305	-0.17988089	NO	NO	NO	NO
1	11060112	11062310	esv3585211	2198	NONE	0.1717	0.001	0.001	0.0041	1.402718891	1.699214406	1.021968066	0.866773026	NO	NO	NO	NO
1	11097642	11106422	esv3585212	8780	MASP2:5	0.0038	0	0	0	-2.812315303	-3.023176818	-4.022361694	-3.084853434	NO	NO	NO	NO
1	11230358	11232287	esv3585215	1929	NONE	0.0166	0	0	0	0.409101629	2.606304821	-0.320635829	-1.135999283	NO	NO	NO	NO
1	11412760	11416751	esv3585220	3991	NONE	0	0	0.004	0.001	-1.475733254	-0.829710552	-1.139604484	-1.917892687	NO	NO	NO	NO
1	11467027	11473433	esv3585222	6406	NONE	0	0	0	0	-0.563311779	0.010108655	-0.029317541	0.119039261	NO	NO	NO	NO
1	11607635	11608681	esv3585223	1046	NONE	0	0.001	0	0	0.860367766	1.728877896	1.397719104	2.970155094	NO	NO	NO	NO
1	11682873	11683189	esv3585224	316	NONE	0.3313	0.7803	0.3929	0.4734	-12.9586518	-12.06743723	-13.36014808	1.824852688	YES	YES	YES	NO
1	11725309	11726488	esv3585225	1179	NONE	0.0038	0	0	0	-0.869442948	1.783715588	-2.073570366	-1.125375717	NO	NO	NO	NO
1	11988599	11993367	esv3585227	4768	NONE	0.0008	0.004	0.0288	0.0082	-1.006226133	1.577268532	-1.87268572	-0.577605359	NO	NO	NO	NO
1	12109017	12111092	esv3585229	2075	NONE	0	0	0	0.0061	-0.82445195	0.155745631	-0.451887268	0.721008446	NO	NO	NO	NO
1	12131651	12134047	esv3585230	2396	NONE	0	0.001	0	0	-1.415693341	0.487327042	-0.829600513	-1.33281658	NO	NO	NO	NO
1	12165800	12168667	esv3585231	2867	NONE	0	0.001	0	0	-1.569754588	-0.115124967	-1.109908023	-0.735871737	NO	NO	NO	NO
1	12485343	12489556	esv3585233	4213	NONE	0	0.001	0	0	-0.316084391	0.938251811	-0.060531504	-0.113622862	NO	NO	NO	NO
1	12702989	12712048	esv3585236	9059	AADACL4:2	0	0	0	0	-1.085817725	-1.174707801	-1.672980006	-0.387440593	NO	NO	NO	NO
1	12743419	12746634	esv3585238	3215	NONE	0.0651	0	0	0	-1.614746453	-0.569046634	-1.075391537	-0.620867307	NO	NO	NO	NO
1	12805277	12807017	esv3585239	1740	C1orf158:1	0.0129	0	0	0	-1.159907335	1.534072823	1.015565696	0.372652665	NO	NO	NO	NO
1	12842004	12846594	esv3585240	4590	NONE	0.0015	0.0288	0.0575	0.0573	-7.609276403	-5.662127343	-7.003295791	-9.857347637	YES	YES	YES	YES
1	12854895	12919194	esv3585241	64299	PRAMEF11:4|HNRNPCL1:2|LINC01784:2|PRAMEF1:2|PRAMEF2:2|HNRNPCL3:1|HNRNPCL4:1	0.0106	0.0288	0.0486	0.0491	-4.335041546	-4.800304369	-5.205995381	-5.142173745	NO	NO	YES	YES
1	12877893	12933272	esv3585244	55379	PRAMEF11:4|PRAMEF2:4|HNRNPCL1:2|LINC01784:2|HNRNPCL3:1|HNRNPCL4:1	0.0318	0.0249	0.0129	0.0276	-0.498634215	-2.388164058	-1.49849781	-0.772604481	NO	NO	NO	NO
1	12893536	12948772	esv3585245	55236	PRAMEF2:4|PRAMEF4:4|HNRNPCL1:2|HNRNPCL3:1|HNRNPCL4:1	0.031	0.0318	0.0258	0.0399	1.902611881	-1.083246065	0.970719505	1.640619757	NO	NO	NO	NO
1	12896438	12928826	esv3585246	32388	PRAMEF2:4|HNRNPCL1:2|HNRNPCL3:1|HNRNPCL4:1	0.028	0.0308	0.0238	0.0399	0.462159783	-0.736133086	-0.135868255	1.30781114	NO	NO	NO	NO
1	12935657	13049137	esv3585250	113480	PRAMEF4:4|PRAMEF7/gPRAMEF8:4|PRAMEF18:3|PRAMEF6:3|PRAMEF27/gPRAMEF9:2|PRAMEF27/gPRAMEF6|PRAMEF9:1	0.0348	0	0.005	0.002	-3.446012171	-5.901519894	-3.772775391	-5.212541075	NO	YES	NO	YES
1	13178772	13187474	esv3585255	8702	HNRNPCL2:2	0.025	0.002	0.003	0.0031	11.62730095	4.899263775	7.023789216	13.96049627	NO	NO	NO	NO
1	13785920	13823188	esv3585258	37268	LRRC38:1	0	0	0.001	0	-1.459019743	-0.786967687	-0.996982724	-0.631150145	NO	NO	NO	NO
1	13807061	13809636	esv3585260	2575	NONE	0.0015	0	0	0	-1.801363857	-1.072193308	-1.476184805	-0.322290812	NO	NO	NO	NO
1	13883458	13884461	esv3585262	1003	NONE	0.0015	0	0	0	2.637727319	3.081412791	2.132303122	4.172193597	NO	NO	NO	NO
1	13884332	13902455	esv3585263	18123	NONE	0	0	0	0.0337	-0.661725656	-0.185780994	-0.949762665	-0.834887175	NO	NO	NO	NO
1	13994663	13998605	esv3585265	3942	NONE	0	0	0	0	-0.501320511	0.697937722	-0.163068695	1.014272669	NO	NO	NO	NO
1	14163092	14167002	esv3585266	3910	NONE	0.1218	0.002	0.001	0	-6.533186578	0.734803267	0.112585349	-16.72058496	YES	NO	NO	YES
1	14222902	14228186	esv3585267	5284	NONE	0	0	0	0.001	-1.139942292	-0.643000543	-1.022294777	0.443130204	NO	NO	NO	NO
1	14437074	14438948	esv3585274	1874	NONE	0.3253	0.2753	0.5377	0.3057	-12.42987949	-11.15147271	-12.43215096	0.343063228	YES	YES	YES	NO
1	14437868	14438136	esv3585275	268	NONE	0.3268	0.2773	0.5397	0.3057	-14.47381893	-13.07281647	-14.19784874	3.995556597	YES	YES	YES	NO
1	14457833	14465198	esv3585278	7365	NONE	0.0008	0	0	0	-0.924399841	-0.307307539	-0.688119829	-0.343502869	NO	NO	NO	NO
1	14547913	14557127	esv3585279	9214	NONE	0	0.001	0	0	0.125960292	-0.230120443	0.134569646	0.122012556	NO	NO	NO	NO
1	14560869	14564038	esv3585280	3169	NONE	0	0	0.001	0	-0.329807105	-1.517056987	-0.634314458	-0.031061671	NO	NO	NO	NO
1	14571715	14572586	esv3585281	871	NONE	0	0	0.001	0.001	-0.033498685	1.687520627	2.251764786	3.156012003	NO	NO	NO	NO
1	14595021	14596824	esv3585282	1803	NONE	0	0	0	0	-0.174788677	-0.738380004	-0.635507443	0.901330954	NO	NO	NO	NO
1	14619205	14622520	esv3585283	3315	NONE	0.0015	0	0	0	-0.691651943	-0.965401672	-0.582875405	0.321179072	NO	NO	NO	NO
1	14684700	14686504	esv3585284	1804	NONE	0.0015	0.001	0	0	4.155655878	5.406841753	4.089240434	7.46440604	NO	NO	NO	NO
1	14731108	14734670	esv3585286	3562	NONE	0	0.001	0	0	0.275845256	0.079945102	0.72107807	0.793098171	NO	NO	NO	NO
1	14735732	14742235	esv3585287	6503	NONE	0	0	0.001	0	0.356247484	-0.03196181	0.486967973	0.171781215	NO	NO	NO	NO
1	15089659	15091713	esv3585288	2054	NONE	0	0	0.001	0	-0.86421118	-1.503221441	-1.551790575	-1.686473063	NO	NO	NO	NO
1	15107148	15147389	esv3585289	40241	NONE	0.0008	0	0	0	-1.605529278	-0.809886255	-0.741315062	-0.928218706	NO	NO	NO	NO
1	15161618	15165674	esv3585290	4056	NONE	0	0.001	0	0	-1.447944778	-1.224346027	-1.724142944	-1.833778681	NO	NO	NO	NO
1	15187487	15192877	esv3585292	5390	NONE	0	0.001	0	0	-1.258672604	-0.710618532	-0.753452393	-0.840678582	NO	NO	NO	NO
1	15217207	15220605	esv3585293	3398	NONE	0	0	0	0	-0.600164688	-0.463305373	-1.168620365	-0.492585567	NO	NO	NO	NO
1	15274725	15279617	esv3585294	4892	NONE	0.0053	0.001	0	0	-2.066583284	-1.634236709	-1.873956795	-1.646381679	NO	NO	NO	NO
1	15325490	15327572	esv3585297	2082	NONE	0.0212	0	0	0.001	-1.135690574	-1.17051691	-1.769541371	-2.406858888	NO	NO	NO	NO
1	15326657	15327606	esv3585298	949	NONE	0.031	0	0	0	-0.211327295	0.184205393	-0.98309863	-3.306386055	NO	NO	NO	NO
1	15340081	15343617	esv3585299	3536	NONE	0.0045	0	0	0	-0.928090267	-0.679887108	0.447106312	-1.40347283	NO	NO	NO	NO
1	15343948	15344881	esv3585300	933	NONE	0	0	0.003	0	0.526697971	-0.224076874	1.016788639	-1.096526848	NO	NO	NO	NO
1	15486947	15491483	esv3585302	4536	C1orf195:1	0.0151	0	0	0	0.470187565	1.271303386	0.070764363	0.450873605	NO	NO	NO	NO
1	15513936	15520369	esv3585305	6433	NONE	0	0	0	0.001	-2.124560889	-1.4440705	-1.858204068	-1.700967888	NO	NO	NO	NO
1	15557847	15558602	esv3585306	755	NONE	0.0371	0	0	0	1.453420389	0.392607302	1.798905413	2.759294242	NO	NO	NO	NO
1	15569645	15571244	esv3585307	1599	NONE	0	0	0.001	0	-0.838116513	0.186201331	0.411881427	-0.78374198	NO	NO	NO	NO
1	15599128	15606167	esv3585308	7039	NONE	0.0008	0.001	0	0	-0.741626404	-0.068140449	-0.433804346	-0.117664087	NO	NO	NO	NO
1	15657384	15659461	esv3585309	2077	NONE	0.0008	0	0	0	-1.440497253	-0.917521596	-0.927129463	-0.610252566	NO	NO	NO	NO
1	15774665	15781763	esv3585311	7098	CTRC:1	0	0	0	0	-1.15153366	1.130726768	-0.622802013	-1.18178251	NO	NO	NO	NO
1	15794893	15814475	esv3585312	19582	CELA2B:7|CELA2A:1	0	0	0.001	0	-1.112473921	-0.379099972	-0.782724063	-0.842707291	NO	NO	NO	NO
1	15920571	15937491	esv3585313	16920	NONE	0.0045	0	0	0	-0.788737896	1.256222509	-0.715769421	-0.09908773	NO	NO	NO	NO
1	15923826	15927256	esv3585314	3430	NONE	0.0106	0	0	0	-0.584639619	1.370330872	-0.257947896	1.035822417	NO	NO	NO	NO
1	15935139	15938228	esv3585315	3089	NONE	0.0106	0	0	0	0.280921411	3.300707281	0.338251089	2.612813839	NO	NO	NO	NO
1	16001481	16009887	esv3585316	8406	NONE	0	0	0	0	-1.664737569	-0.32602052	-1.321962945	-0.877875832	NO	NO	NO	NO
1	16151682	16155632	esv3585321	3950	NONE	0.0764	0.3529	0.0893	0.4264	-1.037782989	0.198189593	-2.411400338	-0.48794054	NO	NO	NO	NO
1	16185814	16193131	esv3585322	7317	NONE	0	0	0.0079	0	0.050383571	1.628996643	-0.997451596	0.001056667	NO	NO	NO	NO
1	16309317	16311379	esv3585323	2062	NONE	0.0008	0	0	0	0.056433795	1.153316131	0.388989934	0.673464037	NO	NO	NO	NO
1	16358741	16372849	esv3585328	14108	CLCNKA:5|CLCNKB:3	0.0008	0	0.002	0	-3.625508423	-2.972237424	-4.309560699	-4.702990927	NO	NO	NO	NO
1	16429786	16435215	esv3585331	5429	NONE	0.0961	0	0	0.001	0.342388995	1.139506547	1.033289926	2.966570738	NO	NO	NO	NO
1	16516967	16525168	esv3585332	8201	ARHGEF19:1	0	0	0	0.001	-2.467285118	-0.766676994	-2.892413761	-2.396568752	NO	NO	NO	NO
1	16542020	16571033	esv3585333	29013	CPLANE2:5	0	0	0	0.001	-2.382418106	-0.795386939	-3.128205956	-2.285997944	NO	NO	NO	NO
1	16649754	16657313	esv3585336	7559	NONE	0	0	0	0	-0.163679249	1.371269486	-0.15059817	0.718545847	NO	NO	NO	NO
1	16751203	16755179	esv3585338	3976	SPATA21:2	0	0	0.0268	0	-1.130275957	-0.1283058	-0.674229111	-0.027620885	NO	NO	NO	NO
1	16809854	16811588	esv3585339	1734	CROCCP3:3	0.1808	0	0	0	-0.710277818	-1.444586955	-1.317113983	-4.110808822	NO	NO	NO	NO
1	16814143	16820729	esv3585340	6586	CROCCP3:5	0	0	0	0.0031	-0.409440782	0.983930265	-0.964187849	-0.544299943	NO	NO	NO	NO
1	16819716	16821068	esv3585341	1352	NONE	0.0008	0	0	0	1.312505374	2.984498036	0.315377299	-2.169655496	NO	NO	NO	NO
1	16842495	16859577	esv3585342	17082	NONE	0	0	0.002	0	8.226505061	5.229362704	5.699822492	7.560938521	NO	NO	NO	NO
1	17361016	17363374	esv3585358	2358	NONE	0	0.002	0	0	1.184489822	1.487303521	0.115535453	-0.241769834	NO	NO	NO	NO
1	17484104	17514588	esv3585361	30484	NONE	0	0	0	0.0235	-1.294366869	-0.789617614	-0.80001039	-1.258310584	NO	NO	NO	NO
1	17641948	17642976	esv3585365	1028	NONE	0.0182	0	0	0	-0.089254803	-1.040604551	-0.00297832	0.245059717	NO	NO	NO	NO
1	17676165	17677662	esv3585367	1497	NONE	0.0446	0.3608	0.5714	0.4458	-1.126863387	-0.14127981	-1.488245248	-0.580664768	NO	NO	NO	NO
1	17815655	17819730	esv3585368	4075	NONE	0	0	0.001	0	-0.139408289	0.7942294	-0.320694761	0.148818159	NO	NO	NO	NO
1	17840332	17844303	esv3585369	3971	NONE	0	0	0.001	0	-1.595764132	0.058670331	-1.382146575	-1.657921866	NO	NO	NO	NO
1	17852589	17863249	esv3585370	10660	NONE	0	0	0.001	0	-1.464045927	-0.611194145	-1.300519666	-0.886480771	NO	NO	NO	NO
1	17868275	17869946	esv3585371	1671	NONE	0	0	0.001	0	-0.896671497	0.89507605	0.277428308	1.048433867	NO	NO	NO	NO
1	17997675	18003884	esv3585373	6209	NONE	0.003	0	0	0	-3.02851329	-3.033726597	-3.12904227	-4.20238594	NO	NO	NO	NO
1	18013086	18019111	esv3585374	6025	ARHGEF10L:1	0	0	0.001	0	-1.615335877	-0.800726303	-1.104969648	-2.85806114	NO	NO	NO	NO
1	18061714	18063037	esv3585375	1323	NONE	0	0	0.003	0	-2.78168671	-2.66692595	-2.192705376	-3.607425104	NO	NO	NO	NO
1	18108493	18109753	esv3585376	1260	NONE	0.0038	0	0	0	0.185191842	0.39160541	0.613496886	4.595486876	NO	NO	NO	NO
1	18190465	18194019	esv3585377	3554	NONE	0.0008	0	0	0	-1.115870404	-1.183655243	-1.796390394	-2.00234528	NO	NO	NO	NO
1	18258853	18260239	esv3585378	1386	NONE	0.0023	0	0	0	-0.376827696	-0.908839831	0.365208694	2.378152504	NO	NO	NO	NO
1	18391523	18394844	esv3585382	3321	LINC01654:2	0.0008	0	0	0	-1.847742002	-1.542126627	-1.524126254	-0.293714145	NO	NO	NO	NO
1	18560199	18563490	esv3585384	3291	NONE	0	0	0.001	0	-0.988431244	-1.128100437	0.270496698	0.039433819	NO	NO	NO	NO
1	18625434	18662672	esv3585386	37238	IGSF21:1	0	0	0	0	-1.907948031	-1.83669498	-1.593252167	-1.715640341	NO	NO	NO	NO
1	19362152	19371531	esv3585390	9379	NONE	0	0	0.001	0.0235	-2.000081571	-1.67098612	-2.449585876	-2.320392759	NO	NO	NO	NO
1	19599364	19614236	esv3585392	14872	AKR7A3:6|AKR7L:1	0.0431	0	0.001	0	-1.307610889	-0.174271239	-0.710315972	-1.27787561	NO	NO	NO	NO
1	19612424	19614161	esv3585393	1737	AKR7A3:2	0.0393	0	0	0	-0.638633977	0.815501326	-0.386879892	-1.392324007	NO	NO	NO	NO
1	19625030	19626206	esv3585394	1176	NONE	0	0	0.001	0.0061	1.514127942	3.3164611	1.10870905	3.589240797	NO	NO	NO	NO
1	19647187	19648342	esv3585395	1155	NONE	0.1634	0	0.002	0	-0.841855682	2.404162852	0.155118685	1.233348838	NO	NO	NO	NO
1	19656632	19661212	esv3585396	4580	SLC66A1:1	0	0	0	0	-1.727990733	-1.303586511	-1.771345814	-1.437783971	NO	NO	NO	NO
1	19720034	19731953	esv3585397	11919	NONE	0.0008	0.001	0	0	-1.486370325	-0.662291553	-1.313641369	-1.06850906	NO	NO	NO	NO
1	19895525	19902091	esv3585402	6566	NONE	0	0.001	0	0.0051	-0.428302314	0.846107469	0.396463604	-0.291354784	NO	NO	NO	NO
1	20012340	20015025	esv3585405	2685	NONE	0.0008	0	0	0	-1.278039315	0.455556695	0.294840811	0.564335421	NO	NO	NO	NO
1	20029024	20039787	esv3585406	10763	NONE	0	0	0	0.001	-0.647516807	0.072433896	-0.575425566	0.409824695	NO	NO	NO	NO
1	20169122	20172285	esv3585407	3163	NONE	0	0	0	0.001	-0.006052887	0.982446858	0.971074996	0.436530214	NO	NO	NO	NO
1	20310746	20312032	esv3585409	1286	NONE	0.0015	0	0.001	0	-1.800902291	-1.132309185	-0.972470304	-2.216114717	NO	NO	NO	NO
1	20326019	20328609	esv3585411	2590	NONE	0	0.001	0	0	0.64221201	1.777708969	1.963467146	2.892892235	NO	NO	NO	NO
1	20346511	20351282	esv3585412	4771	NONE	0.0008	0	0	0	0.556244268	1.452634287	1.004724026	0.687047071	NO	NO	NO	NO
1	20407144	20410753	esv3585413	3609	NONE	0.0393	0.001	0	0	-2.074618864	-1.394185532	-2.086238316	-1.924485622	NO	NO	NO	NO
1	20475427	20476933	esv3585414	1506	PLA2G2F:1	0.0008	0	0	0	-2.722876683	-4.198597773	-4.354587768	-5.589034181	NO	NO	NO	YES
1	20496899	20497748	esv3585415	849	NONE	0.2352	0.175	0.1756	0.3292	-3.108074854	-1.173105069	-3.20709757	-3.761422568	NO	NO	NO	NO
1	20497183	20497735	esv3585416	552	NONE	0.2829	0.1819	0.1776	0.3763	-2.931015573	-1.293365802	-2.928346634	-4.814578038	NO	NO	NO	NO
1	20498758	20500658	esv3585417	1900	PLA2G2C:2	0.003	0	0	0	-1.214940992	0.616145148	-1.536884929	-0.919320256	NO	NO	NO	NO
1	20556444	20558705	esv3585418	2261	NONE	0.0008	0	0	0	-0.33466461	0.828600771	-0.646067517	0.778391682	NO	NO	NO	NO
1	20642971	20643871	esv3585419	900	NONE	0.0008	0	0	0	-0.785255133	-2.223955195	-1.293069945	-0.689690047	NO	NO	NO	NO
1	20851129	20852211	esv3585422	1082	NONE	0	0	0.001	0	-0.058295191	0.492555717	0.695338789	3.926744254	NO	NO	NO	NO
1	20864015	20864732	esv3585423	717	NONE	0.003	0.1123	0.0476	0.0573	0.499693076	1.135795716	0.293087646	1.367177794	NO	NO	NO	NO
1	20906505	20910704	esv3585424	4199	NONE	0	0	0.001	0	-1.132842677	-0.240739017	-0.549252998	-1.327730804	NO	NO	NO	NO
1	20932530	20933743	esv3585425	1213	NONE	0.0015	0	0.005	0.001	-2.055386493	-0.396252283	-0.149270137	0.969777163	NO	NO	NO	NO
1	20992086	21004063	esv3585428	11977	KIF17:4	0.0015	0	0	0	-0.81585729	0.460660983	-0.862167478	-0.859912591	NO	NO	NO	NO
1	21003860	21009758	esv3585429	5898	KIF17:1	0.0008	0	0	0.001	-0.695271508	-0.471835957	-0.800603362	-0.380630583	NO	NO	NO	NO
1	21032353	21033199	esv3585430	846	NONE	0	0	0	0.001	-0.91281132	2.223842595	-0.508473162	2.782881072	NO	NO	NO	NO
1	21296554	21298231	esv3585432	1677	NONE	0	0	0	0.0041	0.482279718	2.196478268	1.409508762	1.213924349	NO	NO	NO	NO
1	21344046	21344973	esv3585433	927	NONE	0.0038	0	0	0	0.623788695	2.395201734	-1.133513722	1.702295088	NO	NO	NO	NO
1	21346279	21346899	esv3585434	620	NONE	0.0008	0	0.001	0	1.357233806	2.163111443	-1.175656739	2.818784413	NO	NO	NO	NO
1	21356815	21358933	esv3585436	2118	NONE	0.0008	0	0	0	0.315651858	1.957176061	-0.184160719	-0.82413331	NO	NO	NO	NO
1	21437150	21443545	esv3585437	6395	EIF4G3:1	0.0008	0	0	0	0.387850134	0.936777819	1.169603004	0.666520895	NO	NO	NO	NO
1	21480071	21484787	esv3585439	4716	NONE	0.0008	0	0	0	0.216095664	1.379517315	0.017306345	-0.054853205	NO	NO	NO	NO
1	21564279	21564646	esv3585442	367	ECE1:1	0.0023	0	0	0	-0.675032096	-0.203231585	-1.034307176	-0.917021783	NO	NO	NO	NO
1	21702344	21814087	esv3585443	111743	NBPF3:21	0.0008	0	0	0	2.351475645	1.277027754	1.480740727	2.074538165	NO	NO	NO	NO
1	21757277	21760173	esv3585445	2896	NONE	0.0008	0.0129	0	0.0051	0.79367931	-0.127864339	-0.635399712	0.501531226	NO	NO	NO	NO
1	21786418	21786695	esv3585446	277	NONE	0.4289	0.7296	0.8552	0.8957	-1.111231357	-1.527046035	-1.893931163	-4.57821109	NO	NO	NO	NO
1	21822915	21828051	esv3585448	5136	NONE	0.0008	0.001	0	0	-0.680415225	-0.598231548	-0.842345883	-0.855184315	NO	NO	NO	NO
1	21894401	21896364	esv3585450	1963	ALPL:1	0	0	0.001	0	-2.569197247	-2.19689727	-3.140029221	-3.147846018	NO	NO	NO	NO
1	22113048	22121361	esv3585453	8313	NONE	0.0015	0	0	0	-0.22553597	1.044628698	-0.696286567	0.607483273	NO	NO	NO	NO
1	22117407	22121971	esv3585454	4564	NONE	0.0091	0	0	0	-0.133920878	1.48958646	-0.198024107	0.837807359	NO	NO	NO	NO
1	22272636	22276725	esv3585455	4089	NONE	0.0045	0	0	0	-1.233315568	0.063024398	-0.918480076	0.258004315	NO	NO	NO	NO
1	22302473	22327106	esv3585456	24633	CELA3B:8	0.003	0.001	0.002	0.001	-0.92096311	-0.399903513	-1.429910541	-0.167777992	NO	NO	NO	NO
1	22307650	22332441	esv3585459	24791	CELA3B:5|CELA3A:4	0.053	0.0239	0.0317	0.0112	-0.485140841	-0.097926383	-0.969385698	0.66758617	NO	NO	NO	NO
1	22362542	22367512	esv3585462	4970	NONE	0	0	0.001	0	-0.690277143	1.506005259	0.369378214	0.371447999	NO	NO	NO	NO
1	22449535	22451506	esv3585463	1971	NONE	0	0	0.001	0	-2.028905594	-1.52107183	-2.244782482	-2.726232458	NO	NO	NO	NO
1	22499759	22509308	esv3585464	9549	NONE	0.0204	0	0	0	-1.182696714	-0.753865633	-1.196425571	-1.736270062	NO	NO	NO	NO
1	22539235	22630247	esv3585465	91012	MIR4418:1	0.0008	0	0	0	-1.989010068	-1.521935514	-1.897569482	-2.290229577	NO	NO	NO	NO
1	22590545	22592053	esv3585466	1508	NONE	0	0	0.001	0	-3.080386574	-3.142940769	-2.34893942	-3.747527106	NO	NO	NO	NO
1	22591060	22594203	esv3585467	3143	MIR4418:1	0.0023	0	0	0	-2.872828053	-2.722048468	-2.101296503	-3.809442932	NO	NO	NO	NO
1	22648535	22652896	esv3585468	4361	NONE	0	0	0.001	0	-1.569308313	-1.164232615	-1.496339616	-1.083153779	NO	NO	NO	NO
1	22815357	22816029	esv3585469	672	NONE	0	0.002	0	0.001	0.899508045	0.385301842	-0.066012987	1.212751045	NO	NO	NO	NO
1	22868686	22871007	esv3585471	2321	NONE	0.0008	0	0	0	-2.358407344	-1.145954668	-2.16542096	-1.454300957	NO	NO	NO	NO
1	22885394	22888041	esv3585472	2647	NONE	0	0.001	0.002	0	-2.111277429	-1.310600933	-0.722166021	-1.600174897	NO	NO	NO	NO
1	22886444	22888220	esv3585473	1776	NONE	0.0008	0	0	0	-1.958596152	-0.72974828	-0.466585787	-2.082749372	NO	NO	NO	NO
1	23434045	23437442	esv3585476	3397	LUZP1:2	0	0	0	0.0133	-0.081086402	-0.216431926	0.120988265	1.246890284	NO	NO	NO	NO
1	23475194	23480093	esv3585477	4899	NONE	0	0.005	0	0	0.088363016	1.047176513	-0.30431213	0.30741938	NO	NO	NO	NO
1	23479093	23481108	esv3585478	2015	NONE	0	0	0	0.001	0.596411095	0.696804479	-0.272478226	0.706010898	NO	NO	NO	NO
1	23595926	23597205	esv3585479	1279	NONE	0	0	0.0129	0	-0.637291154	1.681969005	1.35070092	0.635193195	NO	NO	NO	NO
1	23677175	23680492	esv3585480	3317	NONE	0.0008	0	0	0	-0.822100154	1.575026718	0.067307199	0.937382248	NO	NO	NO	NO
1	23736160	23737780	esv3585482	1620	NONE	0	0	0.0794	0.0061	-1.253589985	0.498065675	-0.083885227	0.037472281	NO	NO	NO	NO
1	23767649	23769754	esv3585483	2105	ASAP3:6	0	0	0.001	0	-2.09501695	-1.592356617	-2.769900408	-2.40302817	NO	NO	NO	NO
1	23867350	23875071	esv3585484	7721	NONE	0	0	0.003	0	-0.296976109	1.383671619	-0.479618763	0.658069191	NO	NO	NO	NO
1	23908383	23909675	esv3585485	1292	NONE	0	0	0	0.0061	-0.890538621	1.27121665	-1.853434635	-1.272862564	NO	NO	NO	NO
1	23997419	23997721	esv3585487	302	NONE	0	0	0	0	-1.729588388	-0.65937893	-1.049831629	1.220253552	NO	NO	NO	NO
1	24005686	24011479	esv3585488	5793	NONE	0	0.001	0	0	-0.483677139	1.928305024	0.693137428	0.166083465	NO	NO	NO	NO
1	24028325	24033753	esv3585489	5428	NONE	0	0	0	0.0102	-0.6760582	-0.219668841	-1.188949987	-0.151773866	NO	NO	NO	NO
1	24040836	24048115	esv3585490	7279	NONE	0	0	0	0.001	-1.171629184	0.201412405	-1.333118804	0.328432218	NO	NO	NO	NO
1	24091293	24100075	esv3585491	8782	ELOA-AS1:2	0.0174	0	0	0	-0.887906116	1.839034467	-0.611015434	-0.52900792	NO	NO	NO	NO
1	24106890	24108440	esv3585492	1550	NONE	0.0008	0	0	0	0.626569833	2.299756536	-0.21500323	0.143267459	NO	NO	NO	NO
1	24161948	24166207	esv3585493	4259	NONE	0	0	0.005	0	-0.153359077	0.41394837	-1.642763261	-0.793155736	NO	NO	NO	NO
1	24216272	24217210	esv3585494	938	NONE	0.0015	0	0	0	0.054091628	0.610630888	-1.639483285	-1.707103454	NO	NO	NO	NO
1	24223580	24224167	esv3585495	587	NONE	0	0.001	0.0248	0	1.400192609	3.380463259	0.063755397	5.232626565	NO	NO	NO	NO
1	24367682	24368465	esv3585496	783	NONE	0	0.005	0	0.001	-0.480218155	2.697214008	1.057825181	1.043013432	NO	NO	NO	NO
1	24520350	24523668	esv3585497	3318	NONE	0.0378	0.1431	0.2371	0.1319	-0.842864784	-0.261412348	-0.824555928	-0.89224462	NO	NO	NO	NO
1	24563347	24567689	esv3585499	4342	NONE	0	0	0	0.001	-0.21504557	0.014680481	0.106247091	-0.190596897	NO	NO	NO	NO
1	24788264	24789586	esv3585501	1322	NONE	0	0.001	0	0	0.653872112	1.25011136	0.219220553	1.557061716	NO	NO	NO	NO
1	24804603	24807532	esv3585502	2929	NONE	0.1369	0.1034	0.1171	0.1309	-0.06992238	-0.244785972	-0.2233485	-0.640108379	NO	NO	NO	NO
1	24839646	24840116	esv3585504	470	NONE	0	0	0.001	0	2.922581203	2.654452311	1.501909424	4.222681427	NO	NO	NO	NO
1	24895774	24900871	esv3585506	5097	NONE	0.1097	0	0	0	-1.311912055	-1.121933651	-7.770875104	-0.343224288	NO	NO	YES	NO
1	25002989	25006222	esv3585510	3233	NONE	0.0008	0	0	0	-0.769287398	1.143260598	-0.974459966	0.067331393	NO	NO	NO	NO
1	25055152	25061253	esv3585511	6101	NONE	0.0008	0	0.002	0	-1.241261226	1.910437845	-0.546733022	0.041327629	NO	NO	NO	NO
1	25077945	25082720	esv3585512	4775	NONE	0.0023	0	0	0	0.451096027	1.43603077	-1.980839737	0.116334314	NO	NO	NO	NO
1	25079380	25081623	esv3585513	2243	NONE	0.0008	0	0	0.002	1.092407213	1.535049655	-0.920872031	0.923078416	NO	NO	NO	NO
1	25102716	25104289	esv3585514	1573	NONE	0	0	0	0.001	1.611596666	2.250023977	-0.019778243	2.964018334	NO	NO	NO	NO
1	25178181	25184721	esv3585515	6540	NONE	0.0008	0.008	0	0.0194	-0.803276034	1.121662715	-0.208311624	0.183149812	NO	NO	NO	NO
1	25201823	25203640	esv3585516	1817	NONE	0.0938	0	0	0	-1.551824976	0.355553302	-0.13904622	0.038656545	NO	NO	NO	NO
1	25310465	25311018	esv3585517	553	NONE	0.0015	0	0	0	-1.719774701	-3.076474241	-2.35036786	-1.87039965	NO	NO	NO	NO
1	25371593	25374228	esv3585518	2635	NONE	0	0.001	0	0.0061	-2.725888394	-3.162028227	-3.084406194	-2.78086957	NO	NO	NO	NO
1	25535821	25539774	esv3585519	3953	NONE	0.0008	0	0	0	-0.004472556	1.120401875	0.727018834	0.795073038	NO	NO	NO	NO
1	25562502	25567778	esv3585520	5276	NONE	0	0	0	0	-1.685161497	0.784902193	-2.513782094	-1.584750805	NO	NO	NO	NO
1	25900284	25908107	esv3585530	7823	NONE	0	0	0.005	0	-1.757672343	-0.591702898	-2.244632263	-1.171745933	NO	NO	NO	NO
1	25909019	25909512	esv3585531	493	NONE	0	0	0.001	0	2.484516049	3.037723192	1.910472428	2.141718776	NO	NO	NO	NO
1	25929212	25934159	esv3585532	4947	NONE	0	0	0	0	-0.581523806	1.209868973	0.263198232	-0.103233688	NO	NO	NO	NO
1	25959693	25962318	esv3585533	2625	NONE	0.0008	0	0	0	0.847551132	2.483381514	1.458058722	1.190331973	NO	NO	NO	NO
1	26268411	26269112	esv3585535	701	NONE	0.0408	0	0	0	-0.314413302	2.517589478	-0.273017018	2.128733471	NO	NO	NO	NO
1	26460095	26464769	esv3585536	4674	NONE	0.1929	0.1789	0.0159	0.0644	0.81300606	2.143787008	0.279550861	0.07681079	NO	NO	NO	NO
1	26639211	26643189	esv3585537	3978	NONE	0.0008	0	0	0	-1.123096913	0.413587084	-1.379743957	-0.339572365	NO	NO	NO	NO
1	26722655	26723971	esv3585538	1316	NONE	0	0	0	0.001	1.198613621	1.283225028	1.265558164	2.170559963	NO	NO	NO	NO
1	26807474	26812234	esv3585539	4760	NONE	0.0008	0	0	0	0.053225496	2.696486618	1.095468083	0.598962315	NO	NO	NO	NO
1	26816310	26828074	esv3585540	11764	NONE	0	0	0	0.001	-1.487442016	1.062179906	-1.112941515	-1.415197314	NO	NO	NO	NO
1	26831324	26840058	esv3585541	8734	NONE	0	0.002	0	0	-0.18070938	2.231387054	0.778280674	0.81836734	NO	NO	NO	NO
1	26930663	26940558	esv3585542	9895	NONE	0	0	0	0	-0.932805529	0.754645077	-0.828416983	-0.068747665	NO	NO	NO	NO
1	26959466	26960891	esv3585543	1425	NONE	0	0	0.001	0	-0.129418821	3.767133057	1.522412609	3.495203353	NO	NO	NO	NO
1	26961278	26963544	esv3585544	2266	NONE	0.0303	0.001	0.0645	0.0184	-1.162279959	0.115605926	-2.092408655	0.716014789	NO	NO	NO	NO
1	26988203	26989515	esv3585545	1312	NONE	0	0	0	0	-0.072979706	1.004127754	-1.310219823	-0.389857745	NO	NO	NO	NO
1	27302813	27306659	esv3585550	3846	NONE	0.0015	0	0	0	-0.645729326	0.006350197	-1.430210213	-0.297412722	NO	NO	NO	NO
1	27464860	27466139	esv3585552	1279	NONE	0.0113	0	0	0	-1.990708023	-0.073370233	-2.116030619	-3.719357105	NO	NO	NO	NO
1	27487361	27491617	esv3585553	4256	NONE	0	0	0.001	0	-0.251436221	1.47349679	-0.732046691	1.102915167	NO	NO	NO	NO
1	27501932	27515855	esv3585554	13923	NONE	0	0	0	0	0.005114488	1.680005331	0.363480269	0.135270785	NO	NO	NO	NO
1	27530011	27536466	esv3585555	6455	NONE	0.0038	0	0	0	0.263973356	0.635935819	-0.40855602	1.366926732	NO	NO	NO	NO
1	27539700	27558142	esv3585556	18442	NONE	0	0	0	0.001	0.084920808	1.055598589	-0.360752526	0.47648566	NO	NO	NO	NO
1	27545432	27549914	esv3585557	4482	NONE	0	0	0	0.0072	0.522866725	1.359063909	0.028577614	1.021742903	NO	NO	NO	NO
1	27571409	27572444	esv3585558	1035	NONE	0.0567	0.001	0	0	-0.987198591	0.105843648	-0.386714244	1.00207537	NO	NO	NO	NO
1	27771674	27775590	esv3585559	3916	NONE	0	0.001	0	0	0.193372751	0.713647568	-0.847261736	0.12713406	NO	NO	NO	NO
1	27905350	27910031	esv3585560	4681	NONE	0	0	0	0.001	-1.208331853	0.636939588	-1.83447136	-0.380417243	NO	NO	NO	NO
1	28001516	28002370	esv3585561	854	NONE	0.0023	0	0	0	1.914333609	2.278955761	0.448180158	2.902783096	NO	NO	NO	NO
1	28094130	28096038	esv3585562	1908	NONE	0.0015	0	0	0	0.177194864	2.190540725	-0.341322565	0.787874684	NO	NO	NO	NO
1	28107186	28110447	esv3585563	3261	NONE	0.0061	0	0	0	0.253750009	1.735639833	-0.184922458	0.907055379	NO	NO	NO	NO
1	28229210	28230440	esv3585566	1230	NONE	0	0.001	0	0	0.243296035	3.733419081	2.535051846	0.687176801	NO	NO	NO	NO
1	28285714	28288380	esv3585567	2666	XKR8:1	0	0	0.001	0	-3.311472746	-2.522544144	-4.988483067	-4.372738239	NO	NO	NO	NO
1	28445925	28448335	esv3585570	2410	NONE	0	0.001	0	0	-0.949029885	0.997375708	-0.509089873	-0.39079548	NO	NO	NO	NO
1	28457880	28458380	esv3585571	500	NONE	0	0	0	0	0.074116586	2.515655784	1.023172403	0.076056405	NO	NO	NO	NO
1	28472089	28475854	esv3585573	3765	PTAFR:1	0	0	0.001	0	-0.724849665	-0.437954223	-1.313723216	-0.310470665	NO	NO	NO	NO
1	28481740	28484057	esv3585574	2317	NONE	0	0	0	0	-0.127996579	-0.796283943	-0.316675042	-0.696876294	NO	NO	NO	NO
1	28551353	28554072	esv3585575	2719	NONE	0.0318	0.0348	0	0.0174	0.433004628	1.867683645	-0.872123049	0.254778825	NO	NO	NO	NO
1	28625434	28627081	esv3585577	1647	NONE	0	0	0.001	0	0.788247104	1.137194684	0.347727284	0.423070237	NO	NO	NO	NO
1	28653002	28655112	esv3585578	2110	NONE	0.003	0	0	0	-0.326477475	1.331583955	-0.303531068	1.563324561	NO	NO	NO	NO
1	28703555	28707818	esv3585579	4263	NONE	0	0	0	0.0082	0.01031383	0.366515345	-0.358298771	-0.256143437	NO	NO	NO	NO
1	28704373	28711255	esv3585580	6882	NONE	0	0	0	0.0041	0.516218327	1.311849442	0.303307322	0.510296638	NO	NO	NO	NO
1	28833906	28835179	esv3585585	1273	RCC1/gSNHG3:1|SNORA73A:1|SNORA73B:1	0.0008	0.0199	0	0.0031	-0.065768801	1.751512377	-0.785425314	0.257858062	NO	NO	NO	NO
1	28900681	28902459	esv3585588	1778	NONE	0	0	0.001	0	-0.087662937	2.591798918	-0.147045489	1.435758648	NO	NO	NO	NO
1	28949642	28960146	esv3585589	10504	NONE	0	0	0.002	0	-0.357439302	0.961144568	-0.538798011	-0.476871559	NO	NO	NO	NO
1	29078986	29080400	esv3585591	1414	NONE	0.0008	0	0	0	0.216592741	2.085704993	-0.250784289	-1.455033488	NO	NO	NO	NO
1	29105358	29109414	esv3585592	4056	NONE	0.003	0	0	0	-0.299270619	0.509321751	-0.451482312	0.83347838	NO	NO	NO	NO
1	29110416	29113757	esv3585593	3341	NONE	0.0008	0	0	0	-0.556384532	1.10211812	-0.342189422	0.263048999	NO	NO	NO	NO
1	29135491	29140334	esv3585594	4843	OPRD1:1	0.0008	0	0	0	-2.697731745	-1.085545946	-2.787787914	-2.591158849	NO	NO	NO	NO
1	29263976	29265138	esv3585595	1162	NONE	0	0	0.001	0	1.896927043	2.766607673	0.068655025	1.384442859	NO	NO	NO	NO
1	29304451	29306212	esv3585596	1761	NONE	0.0681	0.003	0	0.0051	-0.293871864	-0.023248849	0.852935073	0.295213822	NO	NO	NO	NO
1	29440973	29441741	esv3585601	768	NONE	0	0	0.003	0	0.968016632	-0.910869389	-0.281437312	-0.33005077	NO	NO	NO	NO
1	29739799	29740171	esv3585603	372	NONE	0.0008	0	0	0.0092	-1.157517536	-1.344112621	-2.72337628	-1.597326502	NO	NO	NO	NO
1	30082880	30091341	esv3585606	8461	NONE	0	0.001	0	0	0.493761666	-0.158555071	-0.373213524	0.431379866	NO	NO	NO	NO
1	30134468	30137594	esv3585607	3126	NONE	0.0008	0	0	0	0.176972564	0.545794805	1.859822596	0.582509343	NO	NO	NO	NO
1	30144346	30149207	esv3585608	4861	NONE	0	0	0.001	0	-2.040495485	-1.76171738	-1.713678917	-2.002507631	NO	NO	NO	NO
1	30154856	30167410	esv3585609	12554	NONE	0	0	0.001	0	-2.174099108	-2.211196888	-1.878364076	-1.766656197	NO	NO	NO	NO
1	30172969	30173944	esv3585610	975	NONE	0	0.001	0	0	-0.610547696	-3.015036853	-2.659059022	0.330848605	NO	NO	NO	NO
1	30199842	30204007	esv3585611	4165	NONE	0.0023	0	0	0	-4.21176221	-4.590650218	-4.004952386	-5.62410383	NO	NO	NO	YES
1	30360030	30361084	esv3585616	1054	NONE	0.0008	0	0.001	0	0.551791215	2.58108467	2.06419431	3.179929782	NO	NO	NO	NO
1	30479765	30489514	esv3585618	9749	LINC01648:2	0	0.004	0	0.0143	-2.15048667	-2.349211173	-2.498352275	-2.589310506	NO	NO	NO	NO
1	30506964	30508372	esv3585619	1408	NONE	0	0.001	0	0.0092	-2.218878286	-1.520094939	-2.846945189	-3.768662633	NO	NO	NO	NO
1	30617819	30621490	esv3585622	3671	NONE	0	0.002	0	0	-1.421214283	-0.985625528	-1.380412391	-0.550975421	NO	NO	NO	NO
1	30667616	30805808	esv3585623	138192	NONE	0	0.002	0	0	-1.714155239	-1.630515366	-1.5698379	-1.424902547	NO	NO	NO	NO
1	30738620	30739935	esv3585626	1315	NONE	0.0023	0.0865	0	0.0348	-1.5902451	-2.362023314	-2.597764848	-1.865495789	NO	NO	NO	NO
1	30937695	30954670	esv3585627	16975	NONE	0	0.001	0	0	-2.336662461	-2.30003125	-2.484572689	-1.96995559	NO	NO	NO	NO
1	30947086	30950772	esv3585628	3686	NONE	0	0.002	0	0	-2.933151527	-3.028697751	-2.177662306	-1.28021604	NO	NO	NO	NO
1	30961843	30983828	esv3585629	21985	NONE	0	0.001	0	0	0.004468359	0.441529327	1.098275879	2.212634443	NO	NO	NO	NO
1	31060066	31104384	esv3585630	44318	NONE	0	0.001	0	0	-1.461744496	-1.524135446	-1.087761454	-1.254048502	NO	NO	NO	NO
1	31112695	31147310	esv3585632	34615	NONE	0	0.001	0	0	-1.563825233	-1.397664682	-1.733605752	-2.013436005	NO	NO	NO	NO
1	31113463	31116753	esv3585633	3290	NONE	0	0.001	0	0	-2.238126946	-2.450633299	-2.309883238	-2.171168833	NO	NO	NO	NO
1	31122662	31124260	esv3585634	1598	NONE	0.0121	0	0	0	-1.140727414	-1.104399389	-2.892035028	-2.477070689	NO	NO	NO	NO
1	31155603	31166082	esv3585635	10479	NONE	0	0.001	0	0.002	-2.5995097	-2.01693877	-2.722892444	-2.916920746	NO	NO	NO	NO
1	31169439	31171991	esv3585636	2552	NONE	0.0439	0.001	0.001	0	-2.820057246	-2.316834355	-3.526848672	-2.646064211	NO	NO	NO	NO
1	31275317	31281583	esv3585637	6266	NONE	0.0015	0	0	0	-2.048176149	-0.515577259	-2.411215846	-1.860258596	NO	NO	NO	NO
1	31316259	31317327	esv3585638	1068	NONE	0	0	0.001	0	-1.50737567	-1.173945979	-0.379709533	-1.844212396	NO	NO	NO	NO
1	31428476	31431858	esv3585639	3382	NONE	0.0008	0	0	0	0.968300228	1.18704043	0.566068228	0.864908047	NO	NO	NO	NO
1	31440340	31444092	esv3585640	3752	PUM1:1|SNORD103C:1	0	0	0	0	-0.402359616	0.67272574	0.371266241	-0.810055806	NO	NO	NO	NO
1	31547347	31550783	esv3585641	3436	NONE	0.0008	0	0.002	0	-0.978695948	0.864306988	0.045134931	0.288664704	NO	NO	NO	NO
1	31574934	31577199	esv3585642	2265	NONE	0	0.005	0	0	-0.530370522	0.11207764	-0.976787089	0.194226426	NO	NO	NO	NO
1	31633156	31634709	esv3585643	1553	NONE	0.0015	0	0	0	-0.944109651	0.019772001	-1.605638018	0.414971365	NO	NO	NO	NO
1	31720009	31722557	esv3585644	2548	NONE	0	0	0.0437	0.002	-0.040941705	0.177145548	-1.094638777	0.242367443	NO	NO	NO	NO
1	31733410	31733889	esv3585645	479	NONE	0	0.003	0	0	2.672607539	3.199075236	1.483243207	2.438988531	NO	NO	NO	NO
1	31778229	31780517	esv3585647	2288	NONE	0	0	0.001	0	0.190659753	0.747867221	-0.892760328	0.696972295	NO	NO	NO	NO
1	31801550	31806582	esv3585648	5032	NONE	0.0008	0	0	0	0.384157915	0.993861754	0.781710846	0.747977895	NO	NO	NO	NO
1	31870775	31872797	esv3585649	2022	NONE	0	0.001	0	0	-0.102384304	-0.398342056	-1.040728155	1.290069171	NO	NO	NO	NO
1	31963398	31971364	esv3585650	7966	NONE	0.0129	0	0	0	0.873645752	1.829749562	1.661362343	4.847372744	NO	NO	NO	NO
1	32186535	32187858	esv3585652	1323	NONE	0	0.003	0	0	-1.863019178	-0.761847531	-1.667480354	-0.215414243	NO	NO	NO	NO
1	32404350	32411595	esv3585656	7245	NONE	0	0.002	0	0	-1.683642988	0.880543056	-2.09483736	-1.359427844	NO	NO	NO	NO
1	32405459	32409841	esv3585657	4382	NONE	0	0.001	0	0	-1.202501759	1.408070903	-0.90780984	-0.759833147	NO	NO	NO	NO
1	32445683	32447383	esv3585658	1700	NONE	0	0	0	0.001	-0.93329816	0.881058949	-0.378251539	0.839707791	NO	NO	NO	NO
1	32448778	32452166	esv3585659	3388	NONE	0	0	0.0099	0	-0.869032642	-0.326063655	-1.598959262	-0.850477669	NO	NO	NO	NO
1	32462978	32464861	esv3585660	1883	NONE	0	0	0.002	0.002	0.557525402	4.732772133	1.037581923	1.312274133	NO	NO	NO	NO
1	32527623	32528217	esv3585661	594	NONE	0.0053	0.001	0	0	-0.026949497	0.797580678	-1.942598223	3.727247732	NO	NO	NO	NO
1	32535965	32537652	esv3585662	1687	TMEM39B:1	0	0	0.002	0	0.339045262	3.662765018	1.434678581	1.043771769	NO	NO	NO	NO
1	32544371	32548765	esv3585663	4394	NONE	0	0.002	0.001	0.001	-0.023365303	1.918027241	-0.047971077	1.632895597	NO	NO	NO	NO
1	32548014	32553653	esv3585664	5639	MIR5585:1	0	0	0	0.0061	-0.114671747	1.887264764	-0.197001979	0.361471652	NO	NO	NO	NO
1	32551071	32552940	esv3585665	1869	MIR5585:1	0	0	0	0.0061	-0.866935843	1.171831347	-1.025913352	-1.147468591	NO	NO	NO	NO
1	32554454	32556315	esv3585666	1861	NONE	0	0.007	0	0.0061	-0.758966684	0.140492386	-0.933729668	0.180091438	NO	NO	NO	NO
1	32874326	32875482	esv3585669	1156	NONE	0.0325	0	0	0	-0.550977573	1.218179889	-2.204453489	0.244924849	NO	NO	NO	NO
1	32969483	32974121	esv3585671	4638	NONE	0	0	0.002	0	-0.001402034	0.083619424	-0.07894402	0.237227384	NO	NO	NO	NO
1	33049926	33056997	esv3585672	7071	NONE	0.0061	0	0	0	-6.788486668	0.534974816	-0.276154527	-0.324273552	YES	NO	NO	NO
1	33084977	33088485	esv3585673	3508	ZBTB8OS:2	0	0	0	0	1.001591308	1.037113805	-0.350952802	0.282747639	NO	NO	NO	NO
1	33102049	33102922	esv3585674	873	NONE	0.0106	0	0	0	-0.277521278	1.605183109	-0.893953075	2.09442526	NO	NO	NO	NO
1	33226484	33228465	esv3585676	1981	NONE	0	0	0.001	0	-1.803555154	-1.044806294	-1.987758914	-2.224230367	NO	NO	NO	NO
1	33241871	33244469	esv3585677	2598	NONE	0	0	0	0.0061	-0.481738992	2.726575217	1.264145158	1.667307061	NO	NO	NO	NO
1	33273707	33277372	esv3585678	3665	YARS1:2	0	0.001	0	0	-0.590887392	1.07992411	0.410142368	-0.159214024	NO	NO	NO	NO
1	33418209	33421166	esv3585679	2957	NONE	0	0.0089	0	0.001	-0.218768954	0.786933153	-3.209153704	0.048739074	NO	NO	NO	NO
1	33524977	33530257	esv3585680	5280	NONE	0	0	0.001	0	-0.107941871	1.219665064	-0.341756123	1.323328671	NO	NO	NO	NO
1	33614450	33616595	esv3585681	2145	NONE	0.0008	0	0	0	-1.123938592	-1.470724334	-1.826044791	-0.816089892	NO	NO	NO	NO
1	33649503	33652861	esv3585682	3358	NONE	0.0008	0	0	0	-0.242965475	0.954669114	0.454803227	0.509145382	NO	NO	NO	NO
1	33785116	33788257	esv3585683	3141	A3GALT2:1	0	0	0.003	0	-1.944978967	-1.78491377	-2.409632125	-2.000801867	NO	NO	NO	NO
1	33806756	33809181	esv3585684	2425	NONE	0	0	0.001	0	-2.004702336	0.325164501	-2.490420555	-1.698507298	NO	NO	NO	NO
1	33872231	33876506	esv3585688	4275	NONE	0	0	0	0.002	0.335804966	-0.156738678	0.129184128	0.711522861	NO	NO	NO	NO
1	33898091	33899110	esv3585690	1019	NONE	0	0.0099	0	0.0072	-0.377857759	-0.373136815	-0.267273004	3.250364414	NO	NO	NO	NO
1	34028753	34029762	esv3585691	1009	NONE	0.0098	0	0	0	-0.365911422	-1.464754845	-1.047442659	1.251811749	NO	NO	NO	NO
1	34343996	34349071	esv3585694	5075	CSMD2-AS1:1	0	0	0	0.001	-0.561794295	-0.807202861	0.120147589	-0.189222238	NO	NO	NO	NO
1	34406887	34412038	esv3585695	5151	NONE	0	0.001	0	0	-1.414143056	-1.736526239	-0.945476209	-0.069312102	NO	NO	NO	NO
1	34418734	34424907	esv3585698	6173	NONE	0	0.001	0	0	-1.917656511	-2.179172119	-2.437334725	-1.224869327	NO	NO	NO	NO
1	34567749	34569000	esv3585701	1251	NONE	0	0.001	0	0	-5.420828067	1.131828749	1.090355863	0.028397432	YES	NO	NO	NO
1	34588762	34589682	esv3585703	920	NONE	0.0015	0	0	0	0.198218402	-1.769148175	-1.609575111	-0.357724636	NO	NO	NO	NO
1	34916099	34922389	esv3585707	6290	NONE	0.0008	0	0	0	-1.524689554	-2.105689965	-1.582929026	-0.59611989	NO	NO	NO	NO
1	34926095	34932534	esv3585708	6439	NONE	0.0008	0	0	0	-2.093169202	-1.796996635	-1.509981599	-1.039255099	NO	NO	NO	NO
1	35101427	35111985	esv3585709	10558	NONE	0.1301	0.1769	0.0645	0.0613	-1.0470806	-1.245082246	-1.266806704	-0.638566519	NO	NO	NO	NO
1	35177287	35179718	esv3585710	2431	NONE	0	0	0.001	0	-1.027987117	-0.709836189	-1.947639461	-1.725905064	NO	NO	NO	NO
1	35315534	35322648	esv3585711	7114	SMIM12:2	0	0.001	0	0	-1.230679516	0.628379983	-1.28590698	-0.75545019	NO	NO	NO	NO
1	35349257	35350196	esv3585712	939	NONE	0.0151	0	0	0	0.156288368	1.565962198	-1.864289913	0.663551602	NO	NO	NO	NO
1	35504840	35507240	esv3585713	2400	NONE	0.0008	0	0.001	0	0.803047954	2.50330079	2.236442205	1.658747473	NO	NO	NO	NO
1	35627104	35627431	esv3585717	327	NONE	0.4788	0.8976	0.3433	0.816	-6.758620676	-3.162913138	-8.328820513	6.86729782	YES	NO	YES	NO
1	35876854	35877586	esv3585718	732	NONE	0	0	0.001	0	15.13626633	16.00626744	17.76123284	3.457981595	NO	NO	NO	NO
1	35877683	35878859	esv3585719	1176	NONE	0.0091	0	0	0	8.26320248	9.169774519	7.017490551	-1.044488326	NO	NO	NO	NO
1	36092776	36107407	esv3585723	14631	PSMB2:5	0	0	0.001	0	-0.540714679	0.392856559	-0.990221773	-0.474200507	NO	NO	NO	NO
1	36254611	36257595	esv3585724	2984	NONE	0	0.001	0	0	-0.193470242	0.753798643	-0.081722214	-0.060798275	NO	NO	NO	NO
1	36493193	36498455	esv3585728	5262	NONE	0	0.001	0	0	0.284165008	1.010950762	0.277879893	1.94273471	NO	NO	NO	NO
1	36548654	36552357	esv3585729	3703	TEKT2:5	0	0	0.001	0	-2.722562979	-1.438979422	-3.796606147	-2.759594142	NO	NO	NO	NO
1	36624114	36632137	esv3585730	8023	NONE	0	0	0	0	-2.115979867	-0.921315591	-2.827181992	-0.988817905	NO	NO	NO	NO
1	36733282	36733515	esv3585731	233	NONE	0.5129	0.8757	0.9435	0.8732	1.728314936	2.653098462	0.287541786	7.865438119	NO	NO	NO	NO
1	36780780	36785290	esv3585733	4510	SH3D21:4	0	0	0	0.001	-1.277005215	-0.021998122	-1.644504879	0.192618233	NO	NO	NO	NO
1	36818408	36819529	esv3585734	1121	NONE	0	0	0	0	-2.038281961	-1.736515235	-3.187801643	-2.463426538	NO	NO	NO	NO
1	36965384	36967401	esv3585736	2017	NONE	0.0008	0.001	0.001	0	0.691027277	0.252620636	-0.450337673	-1.995805523	NO	NO	NO	NO
1	37050230	37052034	esv3585738	1804	NONE	0	0.001	0	0.0031	-1.49953812	-1.531835509	-1.761894418	-1.797461754	NO	NO	NO	NO
1	37521869	37522704	esv3585744	835	NONE	0.0144	0	0	0	-1.528108103	0.599056975	-1.873616573	-2.106336978	NO	NO	NO	NO
1	37632387	37687276	esv3585746	54889	NONE	0.0008	0	0	0	0.487009689	0.874821482	1.112428601	1.124437022	NO	NO	NO	NO
1	37679037	37679692	esv3585747	655	NONE	0.0061	0	0	0	1.214166417	3.838839249	4.392711436	6.949422658	NO	NO	NO	NO
1	37816478	37816722	esv3585748	244	NONE	0.1089	0.5298	0.3562	0.5521	3.337515278	-0.746757022	3.838464626	3.676933115	NO	NO	NO	NO
1	37846183	37847558	esv3585749	1375	NONE	0.0038	0	0	0	-0.598871916	0.343744135	-0.745594481	-0.535893191	NO	NO	NO	NO
1	37908571	37909295	esv3585751	724	NONE	0	0.004	0	0	-0.637052512	-0.28876205	-0.075534504	0.058789477	NO	NO	NO	NO
1	37918904	37927766	esv3585752	8862	LINC01137:2	0.0008	0.002	0	0.001	-0.960678676	0.442511952	-0.763538575	-0.433299842	NO	NO	NO	NO
1	38013999	38015102	esv3585753	1103	NONE	0.0008	0	0	0	-0.399534023	3.09540759	1.431762233	-0.62373727	NO	NO	NO	NO
1	38056256	38057282	esv3585754	1026	GNL2:1	0.0008	0	0	0	0.369548049	1.460041805	-0.942827786	1.41603459	NO	NO	NO	NO
1	38106221	38110337	esv3585756	4116	NONE	0.0008	0	0	0	-0.394045933	-0.856758401	-1.294999343	0.527669769	NO	NO	NO	NO
1	38132306	38132989	esv3585757	683	NONE	0	0.003	0.0228	0	-1.046697543	-0.63771284	0.578430618	0.468876591	NO	NO	NO	NO
1	38135577	38139016	esv3585758	3439	NONE	0	0	0	0.0031	-0.883372657	-0.114776966	-0.84286856	-1.557800463	NO	NO	NO	NO
1	38175550	38182833	esv3585759	7283	EPHA10:1	0.0015	0	0	0	-2.534214215	-1.707802209	-2.267026659	-1.437454836	NO	NO	NO	NO
1	38535147	38540294	esv3585762	5147	NONE	0.0008	0	0	0	-1.793977542	-2.089837666	-1.745209401	-1.167449043	NO	NO	NO	NO
1	38602522	38604793	esv3585763	2271	NONE	0.0008	0.0288	0	0.002	-1.305110963	-1.974539291	-1.44882657	-1.269216447	NO	NO	NO	NO
1	38642131	38645112	esv3585764	2981	NONE	0.0076	0	0	0	-0.846268177	-0.624865595	-0.578117294	1.302858889	NO	NO	NO	NO
1	38906510	38908028	esv3585766	1518	NONE	0	0	0	0	0.580956653	1.144844449	2.324941583	1.507106236	NO	NO	NO	NO
1	39032419	39040376	esv3585767	7957	NONE	0	0	0	0	-1.608469333	-0.982894113	-1.489475852	-0.956318534	NO	NO	NO	NO
1	39084231	39085822	esv3585768	1591	NONE	0.0537	0.0726	0.1607	0.091	0.746713657	-0.159812202	1.275656754	-0.211245423	NO	NO	NO	NO
1	39128504	39137290	esv3585770	8786	NONE	0	0	0.004	0	-0.095530451	-0.457873957	0.264072199	2.440340481	NO	NO	NO	NO
1	39252570	39253476	esv3585771	906	NONE	0.0008	0	0	0	-0.428741889	-1.056795951	-0.903742549	-2.096644486	NO	NO	NO	NO
1	39277013	39277955	esv3585772	942	NONE	0.1286	0.003	0.001	0.0133	-0.887300637	-1.695879449	-1.201038478	1.53518281	NO	NO	NO	NO
1	39345780	39356898	esv3585774	11118	RHBDL2:2|GJA9:1|GJA9-MYCBP:1	0.0015	0	0	0	0.025718541	0.864294791	0.27234155	0.427133648	NO	NO	NO	NO
1	39401660	39404544	esv3585775	2884	NONE	0.0008	0	0	0	-0.719955142	0.763209941	0.969936003	1.084817383	NO	NO	NO	NO
1	39408255	39409958	esv3585776	1703	NONE	0	0.002	0	0	-0.113711031	1.353952638	0.510610763	0.733333699	NO	NO	NO	NO
1	39433022	39440878	esv3585777	7856	NONE	0.0076	0	0	0	-0.362445248	0.609521435	-0.572150465	-0.468290743	NO	NO	NO	NO
1	39517109	39528562	esv3585781	11453	NONE	0	0	0.001	0	0.411981485	2.355861797	0.718716155	-0.441943014	NO	NO	NO	NO
1	39543821	39545546	esv3585782	1725	NONE	0	0	0.001	0	-0.008617959	0.715663635	1.090309863	2.84482214	NO	NO	NO	NO
1	39561555	39562136	esv3585783	581	NONE	0.0106	0	0	0	1.183777412	3.149378567	0.154083192	1.212032669	NO	NO	NO	NO
1	39575956	39577799	esv3585784	1843	NONE	0.0008	0	0	0	-0.185373573	2.303649031	0.703950723	0.611225719	NO	NO	NO	NO
1	39633199	39635100	esv3585786	1901	NONE	0	0	0	0.001	0.357075719	1.333141653	-0.464361008	1.789901564	NO	NO	NO	NO
1	39998246	40001288	esv3585790	3042	NONE	0.2489	0.007	0	0.0348	1.126356598	1.889641578	0.49757444	0.003665073	NO	NO	NO	NO
1	40063785	40064658	esv3585791	873	NONE	0.0008	0	0	0	1.747507809	1.241265764	0.697966065	0.166748984	NO	NO	NO	NO
1	40276813	40311467	esv3585792	34654	TRIT1:4	0	0	0.001	0	-1.206906236	-0.316783679	-1.003809395	-0.906918126	NO	NO	NO	NO
1	40285184	40287260	esv3585793	2076	NONE	0	0	0.002	0	-1.425348684	-0.340337248	-0.841042468	-1.199484281	NO	NO	NO	NO
1	40350148	40352802	esv3585794	2654	NONE	0	0	0.001	0	-0.395350718	2.321380854	0.115027863	-0.1074055	NO	NO	NO	NO
1	40552356	40553628	esv3585798	1272	NONE	0.0008	0	0.0298	0.0051	0.293013155	0.064771341	0.707888741	0.525373844	NO	NO	NO	NO
1	40575439	40587374	esv3585799	11935	NONE	0.0295	0.001	0	0	-0.274050082	1.15779397	0.058082977	0.632410843	NO	NO	NO	NO
1	40603695	40607183	esv3585800	3488	NONE	0	0	0	0.001	-0.794476766	0.085737771	-0.556152737	0.69472301	NO	NO	NO	NO
1	40819092	40826097	esv3585802	7005	NONE	0	0	0	0	0.58950302	2.31102171	1.03120261	0.759931554	NO	NO	NO	NO
1	40840706	40871773	esv3585803	31067	SMAP2:2	0	0	0	0	-0.324173036	0.741524365	0.147859468	-0.218900323	NO	NO	NO	NO
1	40976681	40983152	esv3585807	6471	EXO5:1	0	0	0.002	0	0.415355286	1.443217114	1.541370076	0.380403282	NO	NO	NO	NO
1	40976808	40979899	esv3585808	3091	NONE	0	0	0.001	0.002	1.480778252	2.659715344	2.823112268	1.652233647	NO	NO	NO	NO
1	41021684	41028600	esv3585809	6916	NONE	0.056	0.0328	0.0159	0.0603	-0.571956559	1.115571505	-0.088539718	0.023868189	NO	NO	NO	NO
1	41068458	41084739	esv3585811	16281	NONE	0	0.001	0	0	-0.441644437	0.081907046	-0.103294455	-0.327868524	NO	NO	NO	NO
1	41143259	41144008	esv3585812	749	NONE	0.0015	0	0	0	0.695903085	1.122583685	0.027404665	1.011585681	NO	NO	NO	NO
1	41419270	41421796	esv3585817	2526	NONE	0	0	0	0.0164	-1.635732777	-0.478855983	-1.858179632	1.429299541	NO	NO	NO	NO
1	41515181	41519598	esv3585819	4417	NONE	0	0	0	0.0061	-0.623923164	-0.360986699	-1.477581246	-0.064513148	NO	NO	NO	NO
1	41571633	41573249	esv3585820	1616	NONE	0.0295	0	0	0	-0.297832136	-0.936263095	-0.29466138	2.342087582	NO	NO	NO	NO
1	41743816	41744510	esv3585822	694	NONE	0.2133	0.001	0	0	0.412169149	0.843718401	1.059408389	3.9632422	NO	NO	NO	NO
1	41746319	41749885	esv3585823	3566	NONE	0	0.001	0	0	-1.796003241	-1.841363835	-1.596866814	-1.072368513	NO	NO	NO	NO
1	41761654	41765870	esv3585825	4216	NONE	0.0008	0	0	0	-0.675591474	0.109416068	-0.981014524	1.260157031	NO	NO	NO	NO
1	42071681	42072604	esv3585828	923	NONE	0.028	0.001	0	0	1.188001194	1.796775274	1.504273971	2.532063368	NO	NO	NO	NO
1	42144091	42144415	esv3585829	324	NONE	0.034	0	0	0	-1.458202299	-2.875043761	-3.065996187	-0.061461369	NO	NO	NO	NO
1	42147163	42148404	esv3585830	1241	NONE	0	0	0	0.0031	-1.742019675	-1.091871578	-2.226019407	-0.944470105	NO	NO	NO	NO
1	42239873	42245696	esv3585831	5823	NONE	0.0023	0	0	0	-1.324236225	-0.520499163	-0.957632184	-0.877816894	NO	NO	NO	NO
1	42346086	42350762	esv3585834	4676	NONE	0.0008	0	0	0	-1.245344037	-0.743489834	-0.639495024	-1.39683291	NO	NO	NO	NO
1	42376582	42377960	esv3585836	1378	NONE	0	0	0.001	0	0.627104379	0.268425086	1.194141152	0.789490074	NO	NO	NO	NO
1	42648650	42652851	esv3585840	4201	NONE	0.0076	0	0	0	-0.551804221	-0.564472293	-0.413973783	-0.258604506	NO	NO	NO	NO
1	42765363	42768581	esv3585842	3218	NONE	0	0	0	0	0.416209554	2.13096715	2.274761761	0.519520189	NO	NO	NO	NO
1	42838166	42839547	esv3585845	1381	NONE	0	0	0.005	0	-0.072430873	0.484830667	0.417935187	0.223214657	NO	NO	NO	NO
1	43270253	43271518	esv3585853	1265	NONE	0.0038	0	0	0	-0.163896869	0.120726381	0.973473245	2.156431635	NO	NO	NO	NO
1	43274592	43276076	esv3585854	1484	NONE	0	0.001	0	0	1.310559568	1.784575069	2.034577418	1.717877662	NO	NO	NO	NO
1	43292875	43294568	esv3585856	1693	NONE	0	0	0	0.002	0.656373375	1.22649125	-1.220168216	1.042046201	NO	NO	NO	NO
1	43322403	43325143	esv3585858	2740	LOC339539:1	0.0015	0	0	0	-0.252516356	0.431359301	-0.660269637	-0.379023943	NO	NO	NO	NO
1	43385223	43386566	esv3585859	1343	NONE	0.0605	0	0	0	0.115663702	1.010378319	-0.425064223	-0.711104799	NO	NO	NO	NO
1	43415656	43416352	esv3585860	696	NONE	0.0008	0	0	0	0.078349944	2.599158501	0.635230335	1.535549492	NO	NO	NO	NO
1	43538303	43539041	esv3585861	738	NONE	0.0628	0.0099	0	0.0552	0.497813792	4.347581378	2.301903177	4.031616778	NO	NO	NO	NO
1	43623373	43624654	esv3585862	1281	NONE	0.0008	0	0	0	-0.026368666	4.287830641	2.77294665	1.166810324	NO	NO	NO	NO
1	43641730	43651369	esv3585863	9639	CFAP57:3	0.0008	0	0	0	-0.687801593	0.462688786	-0.775431506	-0.047951522	NO	NO	NO	NO
1	43694061	43695545	esv3585864	1484	NONE	0.1604	0.0567	0.2183	0.1176	-2.809262494	-1.283954404	-2.893123381	-0.928130811	NO	NO	NO	NO
1	43800918	43803692	esv3585866	2774	MPL:1	0	0.001	0	0	-1.249992099	-0.505310098	-2.579659191	-0.410885463	NO	NO	NO	NO
1	43920483	43922231	esv3585868	1748	NONE	0	0	0	0.001	0.00121467	0.958320722	-0.114126063	1.382075671	NO	NO	NO	NO
1	44009370	44009988	esv3585869	618	NONE	0.0023	0	0	0	-1.034961617	0.019021684	-0.437463086	-3.527741076	NO	NO	NO	NO
1	44107182	44113004	esv3585872	5822	NONE	0	0.001	0	0	0.114033911	1.071429335	0.016515769	0.508698593	NO	NO	NO	NO
1	44533852	44545421	esv3585876	11569	NONE	0	0	0.001	0	-1.381566762	-0.808597481	-1.301393007	-1.006853251	NO	NO	NO	NO
1	44544295	44546162	esv3585877	1867	NONE	0	0	0	0.0041	-1.355396879	-0.049448545	-0.71050903	-0.290844892	NO	NO	NO	NO
1	44544605	44545907	esv3585878	1302	NONE	0	0	0	0.0051	-0.966577474	-0.091532598	-0.575883649	-0.027837605	NO	NO	NO	NO
1	44577534	44581092	esv3585879	3558	NONE	0.0015	0	0	0	-0.282074463	-0.899382385	-1.308135843	-0.006196998	NO	NO	NO	NO
1	44776980	44778202	esv3585881	1222	NONE	0.0015	0	0	0	-2.086569357	-0.524279335	-1.417086662	-0.623529181	NO	NO	NO	NO
1	44853908	44856887	esv3585882	2979	NONE	0	0	0.001	0	-1.140019504	0.186894967	-1.257637091	-0.0282095	NO	NO	NO	NO
1	45019917	45023291	esv3585887	3374	NONE	0.0015	0	0.001	0	-1.014525232	-1.108068415	-1.056326401	1.530669594	NO	NO	NO	NO
1	45021223	45022311	esv3585888	1088	NONE	0.115	0.002	0.1369	0.0164	0.454605219	0.865485427	0.704445778	4.718361534	NO	NO	NO	NO
1	45148738	45187623	esv3585889	38885	ARMH1:5|RNU5F-1:1	0	0	0	0.001	-0.995768764	-0.194337079	-1.030254152	-0.270043195	NO	NO	NO	NO
1	45160118	45169481	esv3585890	9363	ARMH1:3	0	0	0.001	0	-0.84785824	0.438673131	-0.549402809	-0.43808919	NO	NO	NO	NO
1	45175115	45176119	esv3585891	1004	NONE	0	0	0	0	1.630229916	1.103431465	1.325061702	2.472481672	NO	NO	NO	NO
1	45198517	45204138	esv3585892	5621	NONE	0	0	0	0.001	-0.795989908	0.849983941	-1.388375721	-0.359111554	NO	NO	NO	NO
1	45257541	45259278	esv3585893	1737	NONE	0	0	0	0	-1.465564573	1.449559733	-1.739402359	-1.646065752	NO	NO	NO	NO
1	45537743	45541059	esv3585895	3316	NONE	0.0219	0	0	0	1.83654685	3.284829202	3.095137599	0.858955732	NO	NO	NO	NO
1	45618060	45623436	esv3585898	5376	NONE	0	0.003	0	0	0.598070261	1.555401707	0.986488718	0.050059822	NO	NO	NO	NO
1	45629855	45647397	esv3585900	17542	NONE	0	0.004	0	0.001	1.743065816	1.449638974	1.890258973	3.119662677	NO	NO	NO	NO
1	45708588	45709251	esv3585902	663	NONE	0.0847	0	0	0	0.441585488	2.804189215	4.467840511	0.707960401	NO	NO	NO	NO
1	45766890	45768568	esv3585904	1678	NONE	0	0.001	0	0	-1.831265473	-0.198210234	-2.878905205	-0.68480822	NO	NO	NO	NO
1	45822649	45823485	esv3585905	836	NONE	0	0.001	0.0228	0.001	-11.69833611	-3.597558022	-11.46680428	0.652730711	YES	NO	YES	NO
1	45855701	45882133	esv3585906	26432	NONE	0.0023	0	0	0	-0.384505443	0.644656283	-0.421124078	-0.193493924	NO	NO	NO	NO
1	45870230	45871206	esv3585907	976	NONE	0.0129	0	0	0	0.35638095	0.685496365	0.244763089	3.184292194	NO	NO	NO	NO
1	46013311	46014515	esv3585909	1204	NONE	0.0015	0	0	0	0.683467011	2.759401576	1.137500455	2.453786995	NO	NO	NO	NO
1	46026471	46028246	esv3585910	1775	AKR1A1:1	0	0	0.001	0	-1.028196232	-0.460281893	-1.931551236	-0.515371742	NO	NO	NO	NO
1	46090482	46092296	esv3585912	1814	NONE	0	0.001	0	0	-0.190435631	2.65455168	-0.298205733	1.617111077	NO	NO	NO	NO
1	46130830	46134592	esv3585913	3762	NONE	0.0023	0	0.001	0	-0.576824694	-0.011259963	-1.189105547	-1.370912133	NO	NO	NO	NO
1	46243513	46251925	esv3585917	8412	NONE	0.0038	0	0	0	-0.11082259	0.913731501	-0.670307414	0.79979769	NO	NO	NO	NO
1	46287087	46288448	esv3585918	1361	NONE	0.0083	0	0	0	0.396279501	2.427014182	0.729964859	0.100550661	NO	NO	NO	NO
1	46457778	46461778	esv3585924	4000	NONE	0.003	0	0	0	-0.07320428	1.673751202	0.717097522	-0.014096884	NO	NO	NO	NO
1	46474166	46474663	esv3585926	497	NONE	0.0008	0	0	0	-1.579537904	0.777277251	2.113717091	3.338263132	NO	NO	NO	NO
1	46785686	46790440	esv3585932	4754	NONE	0	0	0.001	0	0.102548831	0.658089622	-0.054557524	0.438877774	NO	NO	NO	NO
1	46884238	46892335	esv3585936	8097	NONE	0	0	0	0	-1.837738725	-0.765560637	-1.529397853	-1.558616342	NO	NO	NO	NO
1	47193393	47198251	esv3585937	4858	NONE	0.0015	0	0	0	1.33330363	2.552766544	0.991295634	1.950763134	NO	NO	NO	NO
1	47267517	47267984	esv3585940	467	NONE	0	0	0.001	0	-0.19915258	-0.509953334	0.114814284	1.715160309	NO	NO	NO	NO
1	47346571	47363650	esv3585941	17079	CYP4Z2P:4	0	0	0.0139	0	1.754636732	0.681341459	2.105530814	0.583853479	NO	NO	NO	NO
1	47350362	47353277	esv3585942	2915	CYP4Z2P:2	0	0.001	0	0	1.641769798	-0.212239671	2.613496113	0.632474187	NO	NO	NO	NO
1	47392698	47398120	esv3585944	5422	CYP4A11:1	0	0.001	0	0	-1.132884737	-1.752342568	-2.291359779	-1.482743062	NO	NO	NO	NO
1	47413397	47419516	esv3585946	6119	NONE	0	0	0.006	0	-0.61207868	-0.819643935	0.045800652	-0.186341052	NO	NO	NO	NO
1	47441038	47444432	esv3585948	3394	NONE	0.0061	0	0	0	1.28265554	3.183480697	2.970695644	2.634655494	NO	NO	NO	NO
1	47475290	47507088	esv3585949	31798	CYP4X1:8	0	0	0.001	0	-0.253333899	-0.184848159	0.436187605	0.492609697	NO	NO	NO	NO
1	47623401	47625593	esv3585952	2192	NONE	0	0.006	0.0466	0.0072	-8.215034423	-4.705174644	-6.25765404	-10.06337357	YES	NO	YES	YES
1	47660925	47663081	esv3585953	2156	NONE	0	0	0	0	-0.705194396	0.395534908	-0.093510563	0.909978971	NO	NO	NO	NO
1	47913001	47919152	esv3585955	6151	NONE	0	0	0.001	0	-1.785926108	-2.033465754	-2.056364245	-2.53405873	NO	NO	NO	NO
1	47919419	47920263	esv3585956	844	NONE	0	0	0	0.001	-0.029741134	1.783289892	1.092173529	1.696252	NO	NO	NO	NO
1	48032642	48037550	esv3585957	4908	NONE	0	0.001	0	0	-2.046997717	-1.421233018	-2.156840377	-1.859622791	NO	NO	NO	NO
1	48059395	48073652	esv3585958	14257	NONE	0.0008	0	0	0	-0.268210422	-0.179421741	0.080373411	-0.332623327	NO	NO	NO	NO
1	48221151	48224277	esv3585960	3126	NONE	0.003	0	0	0	-2.350244787	-2.699635445	-2.014342012	-4.134404033	NO	NO	NO	NO
1	48352571	48353250	esv3585961	679	NONE	0	0	0.0079	0	-0.886235378	-0.658036189	0.324352389	0.586379194	NO	NO	NO	NO
1	48370208	48370801	esv3585962	593	NONE	0.0008	0	0	0	-0.002587154	1.213854339	3.658030599	1.874459951	NO	NO	NO	NO
1	48722098	48723666	esv3585964	1568	NONE	0.0703	0	0	0	1.193116276	-1.34817944	-1.36735177	0.761303171	NO	NO	NO	NO
1	48748135	48779526	esv3585965	31391	SPATA6:3	0	0.002	0	0	0.588074742	0.772342462	0.916856124	0.309886501	NO	NO	NO	NO
1	48782859	48789001	esv3585966	6142	NONE	0	0	0	0.001	1.527716843	2.506993437	3.348788761	1.124429653	NO	NO	NO	NO
1	48881698	48898575	esv3585968	16877	NONE	0	0	0	0.0031	0.36127094	0.459436093	0.42044238	-0.897278368	NO	NO	NO	NO
1	48925544	49069090	esv3585970	143546	AGBL4:5|SPATA6:2	0	0	0	0.001	-0.728619774	-0.580479597	-0.754117416	-0.133416842	NO	NO	NO	NO
1	48992346	48995781	esv3585972	3435	NONE	0.0068	0	0	0	-0.958684173	-0.296997491	-1.183735985	-0.638754338	NO	NO	NO	NO
1	49068909	49069541	esv3585973	632	NONE	0	0	0.0387	0.002	0.910955049	3.918092809	1.509038791	0.239879259	NO	NO	NO	NO
1	49195300	49200434	esv3585974	5134	NONE	0	0	0.001	0	-1.1664462	-0.391225577	-1.391422269	-0.668427213	NO	NO	NO	NO
1	49277526	49287595	esv3585976	10069	NONE	0	0.001	0	0	-0.259674397	-0.441389636	0.090733937	1.31096177	NO	NO	NO	NO
1	49353185	49441207	esv3585978	88022	NONE	0.0008	0	0	0	-0.650876573	-1.00107427	-0.485813132	-0.379939671	NO	NO	NO	NO
1	49463350	49467287	esv3585984	3937	NONE	0.003	0	0	0	-0.839061363	-0.731720241	-0.42259852	0.378770758	NO	NO	NO	NO
1	49467099	49570622	esv3585985	103523	AGBL4:1	0.0008	0	0	0	0.100768978	-0.290924113	0.392354742	0.962304278	NO	NO	NO	NO
1	49535079	49537571	esv3585986	2492	NONE	0.0287	0.001	0	0	2.30816776	4.002062686	3.276210707	5.219697864	NO	NO	NO	NO
1	49571975	49575060	esv3585987	3085	NONE	0	0	0.001	0	-0.947518999	-1.772245101	-1.337582127	0.48543968	NO	NO	NO	NO
1	49597860	49609494	esv3585988	11634	NONE	0	0.001	0	0	0.352923287	-0.074266973	0.108370727	0.188360129	NO	NO	NO	NO
1	49605668	49607003	esv3585989	1335	NONE	0	0	0	0	2.396351398	0.539491372	0.574547615	0.75196221	NO	NO	NO	NO
1	49619255	49620057	esv3585990	802	NONE	0.0038	0	0	0	0.129683371	-0.607785258	3.006872655	1.106436801	NO	NO	NO	NO
1	49777181	49851052	esv3585992	73871	AGBL4-IT1:1	0	0	0	0.001	0.146138203	-0.168881146	0.522536851	0.404728854	NO	NO	NO	NO
1	49818456	49844110	esv3585993	25654	AGBL4-IT1:1	0	0	0	0.001	-0.186210192	-0.93399269	-0.003322106	-0.409921542	NO	NO	NO	NO
1	49901454	49902962	esv3585995	1508	NONE	0	0	0	0.001	0.766270654	-1.120448405	1.052136404	-0.373089245	NO	NO	NO	NO
1	49914496	49998562	esv3585997	84066	AGBL4-IT1:2	0.0015	0.0129	0	0.001	0.346371736	0.051994651	0.930532471	0.606919783	NO	NO	NO	NO
1	49931813	49947386	esv3585998	15573	AGBL4-IT1:2	0.0015	0.0139	0	0.001	0.230597114	0.172667219	0.90720199	0.331743191	NO	NO	NO	NO
1	50021162	50029568	esv3585999	8406	NONE	0	0.008	0	0.0061	0.7603784	1.316776665	2.059384014	4.303429838	NO	NO	NO	NO
1	50302526	50306966	esv3586002	4440	NONE	0.0023	0	0	0	0.17531673	0.484284901	0.886046087	-0.047757721	NO	NO	NO	NO
1	50375457	50377197	esv3586003	1740	NONE	0	0	0	0.001	0.332351437	-0.170064261	0.673263871	1.270731403	NO	NO	NO	NO
1	50471127	50484683	esv3586004	13556	NONE	0	0.001	0	0	0.948630461	0.56074713	1.175095562	0.166715127	NO	NO	NO	NO
1	50528628	50541927	esv3586005	13299	NONE	0	0	0.001	0	-0.442666823	-1.445242731	-0.906444851	-0.899847616	NO	NO	NO	NO
1	50683946	50685799	esv3586007	1853	NONE	0	0	0.001	0	-1.41529101	-2.762859371	-0.858607095	0.67580255	NO	NO	NO	NO
1	50720322	50720651	esv3586008	329	NONE	0	0	0	0	0.470964967	-1.227472813	-0.921948179	1.957431621	NO	NO	NO	NO
1	50769439	50771525	esv3586009	2086	NONE	0	0	0.002	0	-0.967052095	-1.599476055	-0.952660681	0.364792793	NO	NO	NO	NO
1	50822521	50827077	esv3586011	4556	NONE	0	0	0	0.002	-1.458751205	-0.706975381	-0.943294981	-0.190665763	NO	NO	NO	NO
1	50861089	50877148	esv3586012	16059	NONE	0	0.001	0	0	0.311933965	0.720092798	0.769445448	0.328576184	NO	NO	NO	NO
1	50915433	50917703	esv3586014	2270	NONE	0	0.001	0	0	-1.153286885	-1.083262957	0.305997302	0.133246156	NO	NO	NO	NO
1	51056608	51058560	esv3586019	1952	NONE	0	0.001	0	0	0.460154613	0.446787467	0.363423046	-0.305247668	NO	NO	NO	NO
1	51102445	51103491	esv3586021	1046	NONE	0	0	0.0397	0.001	1.10684149	3.976467601	1.808961258	2.050809894	NO	NO	NO	NO
1	51128231	51130313	esv3586022	2082	NONE	0.053	0.001	0	0	1.013623213	1.443919832	-0.132564824	0.402913797	NO	NO	NO	NO
1	51354955	51373879	esv3586025	18924	NONE	0	0.001	0	0.001	1.055049038	1.964931289	2.617761566	2.655136212	NO	NO	NO	NO
1	51602286	51612556	esv3586028	10270	C1orf185:1	0	0	0	0.001	0.649162858	0.69933248	1.196512003	0.147219273	NO	NO	NO	NO
1	51608548	51609451	esv3586029	903	NONE	0	0	0	0	0.535615921	0.296612102	2.768140931	1.155899118	NO	NO	NO	NO
1	51677046	51692680	esv3586030	15634	NONE	0	0	0	0.002	-0.314421703	0.966343753	-0.309453222	-0.35807564	NO	NO	NO	NO
1	51714064	51720324	esv3586031	6260	NONE	0	0.001	0	0	-0.441859451	0.629892376	-0.592171416	-0.179201895	NO	NO	NO	NO
1	51718204	51722732	esv3586032	4528	NONE	0.0008	0	0	0	-0.64215304	0.580979748	-0.284025449	0.052482753	NO	NO	NO	NO
1	51778903	51783152	esv3586033	4249	NONE	0.0008	0.002	0	0	-2.303985097	-2.56506928	-2.711255381	-3.285856647	NO	NO	NO	NO
1	51915145	51917455	esv3586035	2310	NONE	0.034	0	0	0	0.242323851	0.607072836	-0.002448822	-0.43182013	NO	NO	NO	NO
1	51951521	51967204	esv3586036	15683	NONE	0	0.001	0	0	0.296546858	0.829294839	-0.3233079	-0.195537188	NO	NO	NO	NO
1	51994441	51997709	esv3586038	3268	NONE	0	0.001	0	0	0.526492623	0.945640456	0.503951789	0.556873945	NO	NO	NO	NO
1	52020868	52035135	esv3586039	14267	CALR4P:5	0	0	0.003	0	-1.133933619	-0.902524628	-1.279455768	-0.803819135	NO	NO	NO	NO
1	52094397	52096199	esv3586041	1802	NONE	0	0	0	0	-0.40189659	0.608375399	-0.92178074	0.734756867	NO	NO	NO	NO
1	52133734	52134412	esv3586042	678	NONE	0	0.001	0	0	0.057276811	0.14124776	2.200327175	2.447995044	NO	NO	NO	NO
1	52146313	52148414	esv3586043	2101	NONE	0	0	0.006	0.001	1.460815432	1.070698634	1.582900785	0.432912577	NO	NO	NO	NO
1	52670332	52675756	esv3586047	5424	NONE	0	0	0.001	0	-0.631931702	0.195915874	-0.148369897	-0.122747701	NO	NO	NO	NO
1	52709216	52716460	esv3586048	7244	NONE	0	0	0	0.001	0.519597476	1.239172553	0.053701558	0.319031659	NO	NO	NO	NO
1	52748211	52751909	esv3586050	3698	NONE	0	0	0.001	0	0.594898636	0.52979981	0.584011566	1.076957816	NO	NO	NO	NO
1	52964521	52967515	esv3586051	2994	NONE	0	0	0.001	0	-0.112002712	1.683849544	1.142090085	0.208920927	NO	NO	NO	NO
1	53025349	53027236	esv3586052	1887	NONE	0	0.002	0	0.0153	-0.791793619	0.654330921	1.268316381	2.457296564	NO	NO	NO	NO
1	53116380	53117086	esv3586053	706	NONE	0	0	0.001	0	1.828507777	3.847175122	2.018659807	3.110791471	NO	NO	NO	NO
1	53178278	53187628	esv3586054	9350	NONE	0	0	0.001	0	-0.505910086	0.230935208	-1.234677281	-0.060218085	NO	NO	NO	NO
1	53355267	53357912	esv3586055	2645	NONE	0.025	0	0	0	0.160796396	2.01342178	0.664132947	0.852272244	NO	NO	NO	NO
1	53369221	53369836	esv3586056	615	NONE	0	0	0	0	1.515884817	4.043370147	0.651927985	4.042475349	NO	NO	NO	NO
1	53417128	53419841	esv3586059	2713	NONE	0.0008	0	0.001	0	0.228401661	2.26764771	0.181856005	-1.414779254	NO	NO	NO	NO
1	53420772	53423900	esv3586060	3128	NONE	0	0	0.001	0	0.850518272	0.862099879	0.368582174	-0.352600835	NO	NO	NO	NO
1	53485873	53486978	esv3586061	1105	NONE	0	0	0.001	0	1.091530485	0.018525441	-0.393224017	-0.839164915	NO	NO	NO	NO
1	53594104	53594942	esv3586062	838	NONE	0.2284	0.2266	0.2073	0.1125	-0.739400488	-1.825686021	-1.680821392	1.80003783	NO	NO	NO	NO
1	53594175	53595598	esv3586063	1423	NONE	0.2284	0.2266	0.2073	0.1125	-0.924543923	-2.281887188	-2.617799657	-0.696134987	NO	NO	NO	NO
1	53595112	53595602	esv3586064	490	NONE	0.2284	0.2266	0.2073	0.1125	0.821995472	-2.526046202	-3.798393302	-2.30513522	NO	NO	NO	NO
1	53875682	53876787	esv3586066	1105	NONE	0	0	0	0.0051	0.008288823	-0.479827253	0.83451918	0.284918323	NO	NO	NO	NO
1	53933585	53933942	esv3586068	357	NONE	0.0015	0.006	0	0.002	-0.030596775	-0.791982237	-0.016773141	1.398641346	NO	NO	NO	NO
1	53981820	53983007	esv3586069	1187	NONE	0	0	0	0.0143	-0.480198341	-0.814473783	-0.984479227	-1.316572661	NO	NO	NO	NO
1	53999369	54002665	esv3586070	3296	NONE	0.0121	0	0	0	-2.221290901	-3.356753338	-3.024228191	-3.479114707	NO	NO	NO	NO
1	54048294	54052518	esv3586072	4224	NONE	0.0008	0	0	0	-1.464661021	-2.116784983	-1.436895059	-1.264404615	NO	NO	NO	NO
1	54138945	54141030	esv3586074	2085	NONE	0	0	0	0.001	-1.110721195	0.03134968	-0.517815141	1.335175717	NO	NO	NO	NO
1	54244596	54247565	esv3586075	2969	NONE	0.003	0	0	0	0.498923175	0.10314869	-0.021549522	0.604108181	NO	NO	NO	NO
1	54351275	54353398	esv3586078	2123	NONE	0.0257	0.001	0	0	-1.054990641	-0.86164967	-1.916044218	0.132223503	NO	NO	NO	NO
1	54367603	54369751	esv3586079	2148	NONE	0.0325	0	0	0	-1.254034518	-1.802458943	-2.967862896	-2.576946146	NO	NO	NO	NO
1	54373700	54374569	esv3586080	869	NONE	0	0	0	0.001	0.0633091	0.965933746	1.071149805	3.208102227	NO	NO	NO	NO
1	54485952	54496065	esv3586082	10113	TMEM59:1	0	0	0	0.001	-0.902395834	0.414687952	-0.249548633	0.020017286	NO	NO	NO	NO
1	54611874	54615207	esv3586084	3333	NONE	0.0356	0	0	0	0.245007464	0.824764383	-0.874814019	-0.639279301	NO	NO	NO	NO
1	54618622	54621821	esv3586085	3199	CDCP2:2	0	0	0	0.001	-1.73463964	-0.360850296	-1.258005141	-0.752009896	NO	NO	NO	NO
1	54623947	54625154	esv3586086	1207	NONE	0	0	0	0.002	-0.864641998	-0.666642022	-1.559812022	1.204204932	NO	NO	NO	NO
1	54738486	54742278	esv3586088	3792	NONE	0	0.002	0	0	-2.833256043	-1.734372738	-3.77022063	-3.627455909	NO	NO	NO	NO
1	54894007	54897603	esv3586089	3596	NONE	0	0.007	0	0.0031	-1.609872346	0.862627106	-1.113085437	-0.969637061	NO	NO	NO	NO
1	55014004	55015476	esv3586091	1472	ACOT11:1	0	0	0.001	0	-2.126188604	-1.173460971	-3.340462735	-1.375759961	NO	NO	NO	NO
1	55030125	55032547	esv3586093	2422	NONE	0	0	0	0.001	-2.118513026	-1.984366159	-3.855773376	-1.29598748	NO	NO	NO	NO
1	55047245	55050680	esv3586095	3435	ACOT11:1	0	0	0	0.001	-2.952984106	-2.664716839	-3.832796687	-3.881531534	NO	NO	NO	NO
1	55070524	55073773	esv3586097	3249	ACOT11:3	0.0008	0	0	0	-2.327442515	-2.590384007	-3.575500024	-1.989776869	NO	NO	NO	NO
1	55077087	55082940	esv3586098	5853	FAM151A:4	0	0	0.001	0	-1.473438394	-0.932227937	-2.009182362	-1.486580062	NO	NO	NO	NO
1	55092043	55096006	esv3586099	3963	NONE	0.1029	0.3718	0.3413	0.2751	-1.304902258	0.272233673	-0.930449978	-0.56034235	NO	NO	NO	NO
1	55300973	55305530	esv3586102	4557	NONE	0.0129	0.002	0	0	-1.704070837	-0.997852096	-1.868372874	0.332661245	NO	NO	NO	NO
1	55341923	55343586	esv3586104	1663	NONE	0.0113	0	0.125	0.0307	0.951464166	1.891998703	1.341926827	1.89408448	NO	NO	NO	NO
1	55342224	55343377	esv3586105	1153	NONE	0.0113	0	0.1339	0.0307	1.545568384	1.38394998	0.753982052	2.416062899	NO	NO	NO	NO
1	55363923	55369186	esv3586106	5263	NONE	0.0272	0.002	0.001	0	0.809706213	1.571679388	0.677505879	2.296483923	NO	NO	NO	NO
1	55371416	55372203	esv3586107	787	NONE	0.0764	0	0	0	2.654337662	4.204887778	5.184756496	5.775403996	NO	NO	NO	NO
1	55494855	55509036	esv3586108	14181	PCSK9:2	0	0.001	0	0	-1.56077779	-1.202105213	-1.016778472	-1.278275151	NO	NO	NO	NO
1	55738363	55762384	esv3586110	24021	NONE	0	0	0	0	-0.671495593	0.037597897	-0.643146781	-0.444787562	NO	NO	NO	NO
1	55851980	55855453	esv3586111	3473	NONE	0.059	0	0	0	0.553079076	0.032797518	1.446386114	0.274216546	NO	NO	NO	NO
1	55927718	55929231	esv3586112	1513	NONE	0.0189	0.0139	0.0476	0.0358	-13.12280967	-11.89692809	-12.97313369	0.013981261	YES	YES	YES	NO
1	56166628	56167800	esv3586114	1172	NONE	0.0023	0	0	0	-1.102439136	-1.506951911	-0.871832307	1.274818223	NO	NO	NO	NO
1	56701331	56703017	esv3586122	1686	NONE	0	0.001	0	0	-0.19828721	-1.201470057	-1.499926362	-0.274908078	NO	NO	NO	NO
1	56766590	56770277	esv3586123	3687	NONE	0	0	0.001	0	-1.048320973	-1.646996274	-0.484731969	0.192815822	NO	NO	NO	NO
1	56781931	56784330	esv3586124	2399	NONE	0	0.001	0	0	0.548426523	-0.4213263	-0.70838875	1.13309338	NO	NO	NO	NO
1	57208746	57210391	esv3586130	1645	FYB2:2	0	0	0.0109	0	0.146321721	-1.819739996	0.00334186	1.421566075	NO	NO	NO	NO
1	57346126	57349055	esv3586132	2929	C8A:1	0	0	0.001	0	-0.616905793	-2.226116501	0.115564198	1.753856268	NO	NO	NO	NO
1	57355570	57362922	esv3586133	7352	NONE	0.0008	0	0	0	-0.880403199	-1.511976187	-0.236664683	0.246226051	NO	NO	NO	NO
1	57384819	57385642	esv3586134	823	NONE	0.0008	0	0.001	0.0757	0.696829177	-1.105993742	0.316358647	0.922014846	NO	NO	NO	NO
1	57582574	57588113	esv3586137	5539	NONE	0	0	0	0.001	-0.633397259	-1.62055641	-1.300298308	-0.813934922	NO	NO	NO	NO
1	57768466	57775580	esv3586142	7114	NONE	0.0008	0	0	0	-0.650839166	-0.982299566	-0.802174292	-0.620275172	NO	NO	NO	NO
1	57783058	57787425	esv3586143	4367	NONE	0	0	0.001	0.0031	-0.874385887	-1.001143971	-0.990971144	-0.466161619	NO	NO	NO	NO
1	58115755	58119072	esv3586147	3317	NONE	0	0	0	0.001	0.327109194	0.144722937	0.965114216	-0.451775049	NO	NO	NO	NO
1	58158817	58165680	esv3586148	6863	NONE	0.0008	0	0	0	0.211579211	-0.089541558	0.39648857	-0.169992145	NO	NO	NO	NO
1	58270014	58273071	esv3586150	3057	NONE	0	0.001	0	0	-1.052536243	-0.941262146	-0.808476413	-0.09192303	NO	NO	NO	NO
1	58382412	58384310	esv3586151	1898	NONE	0	0	0	0.001	-0.017279789	-0.630409587	-0.285750339	1.169084545	NO	NO	NO	NO
1	58567891	58581747	esv3586153	13856	NONE	0	0	0	0	-0.215932002	-0.628655506	-0.127306929	0.996420387	NO	NO	NO	NO
1	58621165	58624312	esv3586154	3147	NONE	0	0	0	0.001	-0.769280158	-0.534424226	0.007260035	0.015756864	NO	NO	NO	NO
1	58647370	58649137	esv3586156	1767	NONE	0.0136	0	0	0	1.638098077	1.478687335	3.273685828	0.023992782	NO	NO	NO	NO
1	58743910	58744826	esv3586159	916	NONE	0.885	0.9115	0.9395	0.955	-6.854467376	0.684927785	0.432191043	-10.02881061	YES	NO	NO	YES
1	58795378	58803922	esv3586163	8544	NONE	0	0.002	0	0	0.169468223	-0.281530692	0.096644482	0.2239108	NO	NO	NO	NO
1	58889963	58898595	esv3586165	8632	NONE	0	0	0.001	0	-0.869423044	-0.836416156	-0.072082402	-0.68249008	NO	NO	NO	NO
1	59039171	59040148	esv3586167	977	NONE	0	0.001	0	0	-0.733170095	-0.650980269	0.060639759	0.413334079	NO	NO	NO	NO
1	59166852	59167694	esv3586169	842	NONE	0	0.001	0	0	0.81378281	2.472591482	1.403580037	4.221061449	NO	NO	NO	NO
1	59198957	59200025	esv3586171	1068	NONE	0	0	0	0	0.768648946	1.959423251	0.859585464	0.744458815	NO	NO	NO	NO
1	59570118	59574857	esv3586175	4739	NONE	0.0008	0	0	0	-1.211365998	-1.685052558	-1.922944308	-0.546500342	NO	NO	NO	NO
1	59674321	59675495	esv3586177	1174	NONE	0.0008	0	0	0.001	4.23931918	5.29279621	4.291503661	5.437404052	NO	NO	NO	NO
1	59753427	59755786	esv3586179	2359	NONE	0.0023	0	0	0	0.68605399	0.915493662	0.894967625	0.718233512	NO	NO	NO	NO
1	59785205	59832951	esv3586180	47746	FGGY:5	0	0	0	0	-0.539260101	-0.11356936	-0.208444083	0.14902595	NO	NO	NO	NO
1	59845688	59846512	esv3586181	824	NONE	0.0545	0.001	0	0	4.365909533	7.156129789	8.611195187	17.91648778	NO	NO	NO	NO
1	59889535	59935157	esv3586183	45622	FGGY:1	0	0	0	0.001	-0.450775757	0.356063797	0.244849292	0.577952264	NO	NO	NO	NO
1	59996812	60036534	esv3586184	39722	FGGY:1	0	0.001	0	0.001	0.201893942	0.907832139	1.002246969	2.144589416	NO	NO	NO	NO
1	60043095	60047811	esv3586185	4716	NONE	0.0053	0.001	0	0.001	-0.221243632	-0.080087558	0.5645828	0.166048266	NO	NO	NO	NO
1	60046725	60050638	esv3586186	3913	NONE	0.1573	0.0219	0.0248	0.0481	-1.663718074	-0.417867482	0.042420377	1.350454303	NO	NO	NO	NO
1	60048628	60049655	esv3586187	1027	NONE	0.2958	0.1292	0.1667	0.3712	-7.929014151	-6.823997766	-6.400788675	1.23963173	YES	YES	YES	NO
1	60053358	60095478	esv3586188	42120	FGGY:2	0	0	0	0.001	-0.245830618	0.648920301	1.00337546	1.567138718	NO	NO	NO	NO
1	60106249	60107104	esv3586190	855	FGGY:1	0.0893	0.0219	0	0.0317	0.645954158	0.626053915	-1.155682137	1.705024989	NO	NO	NO	NO
1	60308955	60319273	esv3586193	10318	HOOK1:4	0	0	0	0.002	1.053554762	0.290406197	0.833065175	-0.639189587	NO	NO	NO	NO
1	60413467	60414805	esv3586194	1338	NONE	0	0.001	0	0	1.367578375	-0.377486456	0.86291989	-0.25167573	NO	NO	NO	NO
1	60487912	60488512	esv3586198	600	NONE	0	0	0.0129	0	1.731476328	-0.29422282	0.802577894	0.222972875	NO	NO	NO	NO
1	60613940	60624695	esv3586199	10755	NONE	0	0.002	0.002	0	-0.489979873	-0.102903808	-0.371464851	0.07441717	NO	NO	NO	NO
1	60736381	60738453	esv3586202	2072	NONE	0	0	0	0	-1.560135396	-1.726393538	-0.511833213	-1.260888633	NO	NO	NO	NO
1	60761067	60770022	esv3586203	8955	NONE	0.0008	0	0	0	0.178067867	-0.206357202	0.179592395	-0.201534514	NO	NO	NO	NO
1	60921450	60921944	esv3586205	494	NONE	0	0.001	0	0	1.369138571	0.132521097	1.743900213	3.314599374	NO	NO	NO	NO
1	60940796	60941406	esv3586207	610	NONE	0.0008	0	0	0	2.280910706	1.440684515	2.455228563	3.052921281	NO	NO	NO	NO
1	60956725	60966104	esv3586208	9379	NONE	0	0	0	0.0123	4.386990308	3.222609914	4.620539885	7.313217361	NO	NO	NO	NO
1	61091966	61094816	esv3586210	2850	NONE	0	0	0	0.001	0.038578657	-0.149307103	0.38460935	-0.483491492	NO	NO	NO	NO
1	61293386	61294181	esv3586212	795	NONE	0.0023	0	0.001	0	1.068995704	0.807403048	1.576739757	1.287676285	NO	NO	NO	NO
1	61671245	61674270	esv3586213	3025	NONE	0.0008	0	0	0	-0.058289565	0.615408133	-0.054276812	-0.217997297	NO	NO	NO	NO
1	61957702	61959050	esv3586217	1348	NONE	0	0	0	0.001	-0.51221609	0.251093823	0.775739986	2.013356353	NO	NO	NO	NO
1	62082822	62083701	esv3586218	879	NONE	0.6172	0.3469	0.2153	0.3732	-13.57296608	-12.39814104	-13.29439	-18.61109869	YES	YES	YES	YES
1	62113386	62119528	esv3586219	6142	NONE	0.0159	0.1421	0.1766	0.0562	-0.199261723	-0.110331866	-0.163771157	0.002365494	NO	NO	NO	NO
1	62259932	62263700	esv3586222	3768	PATJ:2	0	0	0	0	0.818345005	1.20456497	-0.191151194	0.099620888	NO	NO	NO	NO
1	62276280	62285969	esv3586223	9689	NONE	0	0.001	0	0	-0.563180344	0.058383527	-0.154841892	-0.243330703	NO	NO	NO	NO
1	62437436	62452547	esv3586224	15111	NONE	0.0219	0	0	0	-0.115615941	0.288896167	0.26758037	-0.722516692	NO	NO	NO	NO
1	62479250	62480681	esv3586225	1431	NONE	0	0	0.002	0	1.110175541	1.846421399	1.10965285	1.774877845	NO	NO	NO	NO
1	62613055	62616269	esv3586230	3214	PATJ:1	0	0	0.001	0	-0.585137414	0.937344583	-0.443293772	-0.029063215	NO	NO	NO	NO
1	62622902	62624303	esv3586231	1401	NONE	0.0098	0.1004	0.001	0.1391	-1.040385219	0.094757286	-0.664588158	0.771371419	NO	NO	NO	NO
1	62654739	62657162	esv3586232	2423	NONE	0.0038	0.0318	0.3641	0.0327	-0.041177344	0.642166397	0.168562144	0.284020409	NO	NO	NO	NO
1	62765360	62770786	esv3586233	5426	NONE	0.0008	0.008	0	0	-0.664184677	-1.358635045	-0.44626511	-0.462182765	NO	NO	NO	NO
1	62864653	62871377	esv3586234	6724	NONE	0	0	0	0	-0.676181311	-0.224336835	-0.605893771	-0.718346082	NO	NO	NO	NO
1	63490080	63493188	esv3586240	3108	NONE	0.0008	0	0.001	0	-1.077242435	-0.860930647	-1.049479097	-0.281101712	NO	NO	NO	NO
1	63611048	63616563	esv3586242	5515	NONE	0.0015	0	0.001	0	-0.496367774	-0.314897153	-1.076175344	0.69854729	NO	NO	NO	NO
1	63614619	63615963	esv3586243	1344	NONE	0.0764	0	0	0	0.981718349	-0.134742542	-0.903090366	1.689752572	NO	NO	NO	NO
1	64020150	64022279	esv3586246	2129	EFCAB7:1	0	0	0	0	2.133512135	2.038693165	1.313188388	0.133420264	NO	NO	NO	NO
1	64168444	64176892	esv3586247	8448	NONE	0	0	0	0.001	-0.80199614	-1.244313826	-1.14705142	-0.927657798	NO	NO	NO	NO
1	64388047	64389748	esv3586249	1701	NONE	0.0008	0	0.001	0	-1.26603994	-1.480476552	-1.514637093	0.851319332	NO	NO	NO	NO
1	64446557	64448034	esv3586250	1477	NONE	0	0.001	0.0556	0.0031	-0.771581988	-0.668828051	-1.809010184	0.109261137	NO	NO	NO	NO
1	64545979	64547163	esv3586252	1184	NONE	0	0	0	0.002	-0.506954736	0.540335549	0.418400632	1.538272357	NO	NO	NO	NO
1	64720497	64721847	esv3586256	1350	NONE	0	0	0.001	0	2.154341777	2.898464483	2.640865472	2.426719932	NO	NO	NO	NO
1	64724933	64729062	esv3586257	4129	UBE2U:1	0	0	0	0.001	0.725669786	0.392301566	0.84414305	1.784439512	NO	NO	NO	NO
1	64839750	64851343	esv3586259	11593	NONE	0.0983	0.004	0	0	-0.392051086	-0.095893737	0.198925671	-0.533568088	NO	NO	NO	NO
1	64843721	64846495	esv3586260	2774	NONE	0.1044	0.004	0	0	0.595501806	0.326924528	1.046551922	-0.396441293	NO	NO	NO	NO
1	64846773	64848457	esv3586261	1684	NONE	0.1006	0.004	0	0	1.109036921	-0.06800108	0.303227377	0.22376599	NO	NO	NO	NO
1	64852078	64907119	esv3586263	55041	NONE	0	0	0.001	0	-0.056496487	0.209073698	0.455749027	-0.18674614	NO	NO	NO	NO
1	64886148	64954747	esv3586265	68599	CACHD1:1	0	0	0.001	0	-0.594369642	-0.48535906	-0.557770456	-0.361026661	NO	NO	NO	NO
1	64900819	64901510	esv3586266	691	NONE	0	0.001	0	0	1.089745783	-0.444515944	1.604507572	0.063995376	NO	NO	NO	NO
1	65015838	65092452	esv3586268	76614	CACHD1:3|MIR4794:1	0	0	0.001	0	-0.560934722	-0.613738943	-0.391040701	-0.284612186	NO	NO	NO	NO
1	65100590	65101712	esv3586269	1122	NONE	0	0	0.002	0	0.215594512	1.066053509	-0.130525084	2.913822668	NO	NO	NO	NO
1	65412505	65413758	esv3586273	1253	NONE	0	0	0.003	0	1.134197797	0.449922221	0.537794061	0.604840579	NO	NO	NO	NO
1	65640918	65650514	esv3586276	9596	NONE	0	0.001	0	0	-0.89661063	-0.03948614	-0.832524885	-0.319981719	NO	NO	NO	NO
1	65682234	65682602	esv3586277	368	NONE	0.4077	0.0149	0	0.0072	2.239893448	3.042392914	1.447577057	-0.096410756	NO	NO	NO	NO
1	65749435	65765343	esv3586278	15908	NONE	0	0.001	0	0	-0.327941209	0.253215379	-0.197141779	-0.183635844	NO	NO	NO	NO
1	65776407	65797155	esv3586279	20748	NONE	0	0.001	0	0	-0.397994672	0.114146323	0.409041882	0.087597138	NO	NO	NO	NO
1	65787875	65797762	esv3586280	9887	NONE	0	0.001	0	0	-0.36308159	-0.260283139	0.179728058	0.121218661	NO	NO	NO	NO
1	65937886	65952825	esv3586285	14939	NONE	0	0	0.001	0	-0.378045263	0.065610631	-0.088600888	-0.034532595	NO	NO	NO	NO
1	66040926	66043885	esv3586286	2959	NONE	0.084	0	0	0	-0.657820177	0.140519309	0.015177013	0.346986824	NO	NO	NO	NO
1	66170933	66173037	esv3586288	2104	NONE	0.0008	0	0	0	-1.187633417	-0.30845019	-0.16954772	-0.109658608	NO	NO	NO	NO
1	66473782	66475778	esv3586289	1996	NONE	0	0.001	0	0	-0.514871646	-1.092752283	-1.714807745	-0.587356172	NO	NO	NO	NO
1	66517248	66518514	esv3586291	1266	NONE	0	0	0	0	0.333906343	-0.257751748	-0.685128205	1.094913582	NO	NO	NO	NO
1	66584504	66585315	esv3586292	811	NONE	0.003	0	0	0	0.308222339	1.003650024	0.939123447	2.607215898	NO	NO	NO	NO
1	66624430	66631307	esv3586293	6877	NONE	0.0008	0	0	0	-0.359228909	0.21356925	0.289792693	0.000453085	NO	NO	NO	NO
1	66656105	66670141	esv3586294	14036	NONE	0.0008	0	0	0	1.822423557	1.804179557	1.759734264	4.838876826	NO	NO	NO	NO
1	67146760	67151325	esv3586298	4565	SGIP1:1	0	0	0.001	0	-0.786532559	-0.267390194	-0.63599791	-0.377902762	NO	NO	NO	NO
1	67321683	67324274	esv3586302	2591	NONE	0.003	0	0	0	1.425292282	3.218854323	2.365895679	0.935750495	NO	NO	NO	NO
1	67384709	67385915	esv3586303	1206	NONE	0.0008	0	0	0.0041	-0.532696351	0.660808546	0.920008802	-0.340173704	NO	NO	NO	NO
1	67571702	67576455	esv3586304	4753	NONE	0	0	0.003	0	-0.401933141	-0.038634014	-0.712947692	-0.694991625	NO	NO	NO	NO
1	67823995	67832241	esv3586305	8246	NONE	0	0	0.001	0	0.502134976	1.282623886	-0.197347109	0.022373082	NO	NO	NO	NO
1	67965144	67966895	esv3586307	1751	NONE	0	0	0	0	-1.264580804	0.692362298	-1.668937289	-0.25547246	NO	NO	NO	NO
1	67995438	67996814	esv3586308	1376	NONE	0	0	0.001	0	1.853529953	1.611565768	1.408892163	1.692525837	NO	NO	NO	NO
1	68007970	68008811	esv3586309	841	NONE	0.5091	0.7227	0.8294	0.7873	-1.138740544	-11.10844171	-12.86011747	2.534076471	NO	YES	YES	NO
1	68015384	68024019	esv3586310	8635	NONE	0	0	0	0.002	-0.144796079	0.103663375	0.451823683	2.689045914	NO	NO	NO	NO
1	68350836	68351527	esv3586314	691	NONE	0	0.001	0	0	1.755994273	1.302603304	-0.167271772	1.281695368	NO	NO	NO	NO
1	68375746	68376836	esv3586315	1090	NONE	0	0	0.002	0	1.204364973	1.014791208	1.891383821	1.475867713	NO	NO	NO	NO
1	68462082	68465542	esv3586316	3460	NONE	0	0	0	0.001	-0.130259182	-0.279123406	-0.76134792	0.765320855	NO	NO	NO	NO
1	68561387	68564079	esv3586317	2692	NONE	0	0	0	0.001	2.101146629	0.263023857	0.20798883	0.080581186	NO	NO	NO	NO
1	68835820	68837170	esv3586320	1350	NONE	0	0.001	0	0	-0.546540767	0.545132318	0.042752362	-0.570969667	NO	NO	NO	NO
1	68847586	68851622	esv3586321	4036	NONE	0	0	0.002	0	-1.114196297	-1.433268241	-1.236008333	0.33846492	NO	NO	NO	NO
1	69020016	69021218	esv3586323	1202	NONE	0.0189	0	0	0	1.428745431	2.204264125	0.777618781	5.423718147	NO	NO	NO	NO
1	69073832	69075051	esv3586324	1219	NONE	0.003	0	0	0	-0.21306242	1.504715252	-0.544152491	0.277481746	NO	NO	NO	NO
1	69096232	69100511	esv3586325	4279	NONE	0	0	0	0.001	1.17407394	0.296464103	0.595232459	0.074633092	NO	NO	NO	NO
1	69246608	69266941	esv3586326	20333	NONE	0	0.001	0	0	-0.24293338	-0.464613421	-0.555662848	0.09673978	NO	NO	NO	NO
1	69479743	69480631	esv3586327	888	NONE	0.0219	0	0	0	2.468910168	0.427041686	1.11707412	1.459309267	NO	NO	NO	NO
1	69731151	69734809	esv3586329	3658	NONE	0.0008	0	0	0	0.482793045	1.37913917	1.315529479	-0.209875367	NO	NO	NO	NO
1	69973951	69986291	esv3586331	12340	NONE	0	0	0.001	0	0.326913939	0.244488095	0.445586617	-0.193185832	NO	NO	NO	NO
1	69996359	70002732	esv3586332	6373	NONE	0.0371	0.001	0	0	0.921708568	1.128045765	1.030545168	0.798929953	NO	NO	NO	NO
1	70011052	70012446	esv3586333	1394	NONE	0	0.001	0	0.0123	1.021820937	0.328009008	-0.786525451	2.051524355	NO	NO	NO	NO
1	70103330	70105982	esv3586338	2652	NONE	0.0008	0	0	0	0.761002901	0.192629426	1.161418284	-1.271272181	NO	NO	NO	NO
1	70324161	70330377	esv3586344	6216	NONE	0.0008	0	0	0	0.566963659	-0.591751244	0.403761759	-0.493818609	NO	NO	NO	NO
1	70648220	70650322	esv3586350	2102	NONE	0	0	0.0198	0.002	0.848742595	0.671001629	-0.502518832	-0.034045169	NO	NO	NO	NO
1	70716381	70720260	esv3586351	3879	SRSF11:2	0.0008	0	0	0	0.542161319	0.943433332	0.133117063	0.489732198	NO	NO	NO	NO
1	70755433	70755967	esv3586352	534	NONE	0	0	0.003	0	0.87210461	1.959423251	1.231373963	0.857009737	NO	NO	NO	NO
1	70820401	70825007	esv3586353	4606	HHLA3:3|ANKRD13C:1	0.0008	0	0.001	0	-0.424602608	0.230203406	-1.036891041	-0.199949148	NO	NO	NO	NO
1	70987622	70989418	esv3586357	1796	NONE	0.0023	0	0	0	-0.580460536	-0.890784662	-0.637918991	1.962381786	NO	NO	NO	NO
1	71001079	71035960	esv3586358	34881	NONE	0	0	0	0.001	-0.105378058	-0.383403321	-0.395276664	-0.438482644	NO	NO	NO	NO
1	71018937	71026171	esv3586359	7234	NONE	0.0008	0	0	0.001	-0.541570183	-1.267768425	-0.557826067	-0.185333574	NO	NO	NO	NO
1	71044372	71046630	esv3586360	2258	NONE	0	0	0	0.002	-0.291412711	-0.16596726	0.558927448	1.390887244	NO	NO	NO	NO
1	71163767	71168060	esv3586362	4293	NONE	0.0015	0	0	0	-0.472674434	-0.56118048	0.045989598	-0.353128969	NO	NO	NO	NO
1	71237361	71240331	esv3586363	2970	NONE	0.0991	0.0288	0.0079	0.0777	-0.665587931	-0.314903618	-0.382839066	0.165636328	NO	NO	NO	NO
1	71244098	71249596	esv3586364	5498	NONE	0	0.004	0	0.0051	-0.379461799	-0.302415395	-0.668480144	0.170622435	NO	NO	NO	NO
1	71302528	71315092	esv3586365	12564	NONE	0	0.002	0	0	-0.502725981	-0.416070133	0.013325714	-0.033113618	NO	NO	NO	NO
1	71351243	71367020	esv3586367	15777	NONE	0	0.002	0	0.002	-0.713553282	-0.322132561	-0.611508834	0.050212881	NO	NO	NO	NO
1	71352804	71366426	esv3586368	13622	NONE	0	0	0	0.002	-0.564477515	-0.302940273	-0.621618606	-0.001997321	NO	NO	NO	NO
1	71429604	71471728	esv3586370	42124	PTGER3:3	0.003	0	0	0.001	-0.222263312	-0.590781556	-0.514118495	-0.125132702	NO	NO	NO	NO
1	71487188	71489783	esv3586371	2595	NONE	0.0257	0	0	0	0.173111098	-0.895342753	-0.260866157	1.599108496	NO	NO	NO	NO
1	71589399	71686024	esv3586374	96625	NONE	0.0008	0	0	0	0.371474129	0.420563008	0.829859699	0.805057901	NO	NO	NO	NO
1	71614186	71615820	esv3586377	1634	NONE	0.0008	0.001	0	0	3.997639099	2.92235306	3.825019679	1.905556354	NO	NO	NO	NO
1	71718761	71731545	esv3586378	12784	NONE	0.0015	0	0	0	0.082240898	0.143139103	0.211369424	-0.192209493	NO	NO	NO	NO
1	71784794	71855533	esv3586382	70739	NONE	0	0.001	0	0	0.318871256	0.241962251	0.604083687	-0.042683779	NO	NO	NO	NO
1	71820428	71823708	esv3586383	3280	NONE	0	0.001	0	0	-0.398612718	0.035530674	0.107167154	-0.676931226	NO	NO	NO	NO
1	71935511	71941184	esv3586384	5673	NONE	0	0.001	0	0	0.218016065	0.050339356	-0.012606893	-0.131763903	NO	NO	NO	NO
1	72383975	72393307	esv3586390	9332	NONE	0	0	0.001	0	0.010417518	-0.807850426	-0.319683671	-0.443541175	NO	NO	NO	NO
1	72407317	72476926	esv3586391	69609	NONE	0	0	0	0.001	0.552659664	-0.51799273	-0.132964152	-0.565291524	NO	NO	NO	NO
1	72407365	72477635	esv3586392	70270	NONE	0	0	0.002	0.001	0.53946037	-0.515828545	-0.115524713	-0.551599677	NO	NO	NO	NO
1	72449620	72450027	esv3586393	407	NONE	0.0522	0.1262	0.4206	0.2526	6.067849731	1.966537236	4.66379481	4.937787235	NO	NO	NO	NO
1	72459982	72461991	esv3586394	2009	NONE	0	0	0.001	0	0.751414917	-0.875082363	-0.230889265	0.427235899	NO	NO	NO	NO
1	72496908	72498611	esv3586396	1703	NONE	0	0.001	0	0	0.102555655	-1.593585534	0.54947063	-0.348952796	NO	NO	NO	NO
1	72507513	72654910	esv3586397	147397	NONE	0	0	0	0.001	0.484575714	-0.45279194	-0.101662492	-0.650223376	NO	NO	NO	NO
1	72581113	72625107	esv3586401	43994	NONE	0	0	0	0.001	0.566679082	-0.16137087	0.10238563	-0.22273959	NO	NO	NO	NO
1	72590797	72604520	esv3586402	13723	NONE	0.0008	0	0	0.001	0.974313851	0.627887936	0.529884951	-0.270883424	NO	NO	NO	NO
1	72618680	72657550	esv3586403	38870	NONE	0	0.001	0	0.001	0.328858127	-0.565343396	0.107027005	-0.574970791	NO	NO	NO	NO
1	72713656	72717576	esv3586407	3920	NONE	0	0	0.001	0	-0.357135184	-1.202296859	-0.98750153	0.240008644	NO	NO	NO	NO
1	72755694	72764095	esv3586409	8401	NONE	0.087	0.174	0.0129	0.0552	1.70324319	0.397566075	0.67869206	-0.56156149	NO	NO	NO	NO
1	72766343	72811815	esv3586410	45472	NONE	0.531	0.6412	0.9335	0.6207	0.106563332	-0.318803632	-0.047335804	-0.563080996	NO	NO	NO	NO
1	72778537	72784594	esv3586411	6057	NONE	0.531	0.6412	0.9335	0.6217	-0.94447574	-0.708206468	-1.288863462	0.632948482	NO	NO	NO	NO
1	72822391	72832096	esv3586414	9705	NONE	0	0	0	0.001	1.265833096	-0.046195432	0.643695295	-0.836530826	NO	NO	NO	NO
1	73011033	73093127	esv3586417	82094	NONE	0	0.002	0	0.001	0.421525833	-0.659816329	-0.189745389	-0.756539134	NO	NO	NO	NO
1	73012472	73094877	esv3586418	82405	NONE	0	0.002	0	0	0.46676589	-0.643435838	-0.145037547	-0.74210069	NO	NO	NO	NO
1	73102827	73109063	esv3586422	6236	NONE	0	0	0.001	0	0.317918917	-0.190247503	0.834485567	-0.850265263	NO	NO	NO	NO
1	73124855	73137546	esv3586423	12691	NONE	0	0	0	0.001	0.180201887	-0.654543546	0.144879127	-0.145604863	NO	NO	NO	NO
1	73449070	73457434	esv3586426	8364	NONE	0.0008	0	0	0	0.550654848	0.23431465	0.151080336	2.315004395	NO	NO	NO	NO
1	73539295	73586691	esv3586429	47396	NONE	0	0	0	0	0.248631946	-0.275716323	0.266273899	-0.522689728	NO	NO	NO	NO
1	73646121	73650728	esv3586430	4607	NONE	0	0	0.001	0	-1.502899403	-1.211654576	-0.831459056	-1.943579037	NO	NO	NO	NO
1	73681736	73683049	esv3586431	1313	NONE	0.0008	0	0	0	0.799640995	0.590131805	1.14968243	-0.160263158	NO	NO	NO	NO
1	73813524	73814960	esv3586435	1436	NONE	0	0	0.001	0	1.184152637	0.024558637	1.955015226	-0.029080578	NO	NO	NO	NO
1	73976115	73976823	esv3586437	708	NONE	0	0.001	0	0	2.692807403	-0.358839737	2.533683959	-0.009060071	NO	NO	NO	NO
1	74235902	74238623	esv3586441	2721	NONE	0.0015	0	0	0	-1.195449808	-1.996328039	-0.845435773	-2.071630613	NO	NO	NO	NO
1	74312425	74312678	esv3586443	253	NONE	0.2496	0.3539	0.5357	0.4427	3.941289319	-0.09693359	2.804494864	5.387221427	NO	NO	NO	NO
1	74432323	74435267	esv3586448	2944	NONE	0.0189	0	0	0	1.476767358	1.07835177	1.346421287	-0.627204575	NO	NO	NO	NO
1	74625413	74631431	esv3586451	6018	NONE	0.0008	0	0	0	0.299883732	-0.504896494	-0.336463945	-0.694838937	NO	NO	NO	NO
1	74757180	74759578	esv3586456	2398	NONE	0.0008	0	0	0	1.760350727	-0.283565111	0.925477921	-1.130732794	NO	NO	NO	NO
1	74800295	74813886	esv3586457	13591	FPGT-TNNI3K/gTNNI3K:3	0.0008	0	0	0	0.740900407	0.664333646	1.157418389	2.686902838	NO	NO	NO	NO
1	74829761	74830516	esv3586458	755	NONE	0.0098	0	0	0	-0.156377153	-1.094199906	-0.041816983	0.53033876	NO	NO	NO	NO
1	75180017	75192579	esv3586466	12562	CRYZ:4	0	0	0	0	-0.063652231	0.579020401	-0.068701932	-0.071483107	NO	NO	NO	NO
1	75183559	75186106	esv3586467	2547	CRYZ:1	0.0008	0.0139	0	0	-0.04973532	1.113701804	1.794603615	0.926564174	NO	NO	NO	NO
1	75248871	75250747	esv3586469	1876	NONE	0.0008	0	0	0	1.065155674	-0.529656392	1.50010808	0.492799112	NO	NO	NO	NO
1	75278575	75279681	esv3586470	1106	NONE	0.0015	0	0	0	-0.570911709	-0.069911539	-0.166362546	0.95538155	NO	NO	NO	NO
1	75471165	75483759	esv3586472	12594	NONE	0	0	0.001	0	0.07373641	0.120530952	0.455028565	-0.270322606	NO	NO	NO	NO
1	75534665	75539882	esv3586474	5217	NONE	0.0008	0	0	0	0.27026908	-0.515847437	-14.10271023	-0.038349353	NO	NO	YES	NO
1	75654508	75655289	esv3586476	781	NONE	0	0	0	0.001	0.215825677	1.273168719	0.291905842	3.35292131	NO	NO	NO	NO
1	75718974	75727768	esv3586478	8794	NONE	0.0038	0	0	0	0.398150455	0.816767258	0.092882663	0.894040364	NO	NO	NO	NO
1	75875250	75877387	esv3586482	2137	NONE	0.0038	0	0	0	-0.074358995	0.33688206	-1.021017147	0.416251126	NO	NO	NO	NO
1	75877261	75891335	esv3586483	14074	NONE	0	0	0.001	0	0.225294759	0.286197781	-0.025505744	-0.368388362	NO	NO	NO	NO
1	75879388	75880397	esv3586484	1009	NONE	0	0	0.001	0	1.623431293	0.193539673	1.21534542	2.562265896	NO	NO	NO	NO
1	75894347	75895978	esv3586485	1631	NONE	0.0008	0	0	0	-0.857252072	0.95194664	-0.463101701	1.846620564	NO	NO	NO	NO
1	76089475	76095278	esv3586488	5803	NONE	0.0008	0	0	0	0.209397658	0.727207691	0.074460156	-0.08871799	NO	NO	NO	NO
1	76133952	76135001	esv3586489	1049	NONE	0.0643	0.002	0	0	-0.289445752	-0.130611272	-1.170365564	-0.4935298	NO	NO	NO	NO
1	76262193	76264783	esv3586491	2590	MSH4:1	0	0	0	0	-1.469481871	-1.068096567	-1.549862395	-1.284094112	NO	NO	NO	NO
1	76610664	76613898	esv3586494	3234	NONE	0.0008	0	0	0	0.086302217	-0.426384907	-1.561753239	0.086067242	NO	NO	NO	NO
1	76646678	76651923	esv3586495	5245	NONE	0	0.001	0	0	-0.938977692	-0.922084663	-0.495333748	-1.211623997	NO	NO	NO	NO
1	76900598	76903357	esv3586497	2759	NONE	0	0	0.0248	0	1.057879835	0.952497329	1.441254567	-0.626726076	NO	NO	NO	NO
1	76982224	76985494	esv3586500	3270	NONE	0.0015	0	0	0	2.285619035	1.429323112	1.618170438	-1.219847341	NO	NO	NO	NO
1	77221940	77222907	esv3586504	967	NONE	0.0008	0	0	0	1.789368706	0.682130159	0.379182434	0.619027194	NO	NO	NO	NO
1	77244070	77294959	esv3586506	50889	LINC02567:1	0	0.001	0	0	-0.331649789	-0.746644443	-0.27853417	0.232873968	NO	NO	NO	NO
1	77253890	77260233	esv3586507	6343	NONE	0	0.002	0	0	-0.445472241	-1.228985055	-0.822372107	-0.223263821	NO	NO	NO	NO
1	77261876	77263602	esv3586508	1726	NONE	0.0015	0	0	0	3.183773278	1.897975627	2.174200301	8.960502244	NO	NO	NO	NO
1	77343673	77353376	esv3586510	9703	NONE	0.0008	0	0	0	-0.719898548	-1.305185505	-1.358443491	-0.242176125	NO	NO	NO	NO
1	77382568	77414231	esv3586511	31663	NONE	0	0	0.001	0	-0.509091515	-0.649648592	-0.019758976	-0.191643186	NO	NO	NO	NO
1	77467683	77474531	esv3586513	6848	NONE	0.0038	0	0	0	2.930179403	1.485333422	2.573840992	10.2052886	NO	NO	NO	NO
1	77575152	77579541	esv3586515	4389	NONE	0	0	0	0.001	3.047596437	2.38389492	2.833012387	5.491215103	NO	NO	NO	NO
1	77579028	77580955	esv3586517	1927	NONE	0	0	0	0.0031	1.55219899	-0.092241706	1.840184865	1.378197799	NO	NO	NO	NO
1	77774504	77781600	esv3586520	7096	NONE	0.0151	0	0	0	0.175742239	-0.074105342	0.46752045	-0.436924052	NO	NO	NO	NO
1	77825358	77840740	esv3586521	15382	NONE	0.0015	0	0	0	-0.244071392	-0.888332862	-0.821922408	-0.641366793	NO	NO	NO	NO
1	77830614	77832676	esv3586522	2062	NONE	0.0008	0	0.002	0	0.047503093	-0.253889766	-0.477554938	-0.123234926	NO	NO	NO	NO
1	77909399	77911523	esv3586524	2124	NONE	0	0	0	0	-1.477468995	-2.223556325	-1.345414405	-0.537265152	NO	NO	NO	NO
1	77969962	78000340	esv3586526	30378	AK5:2	0.0008	0	0	0	-0.684614002	-0.732115512	-0.914469118	-0.437640794	NO	NO	NO	NO
1	78209235	78220193	esv3586528	10958	USP33:1	0	0	0	0.001	0.899553059	2.047739988	1.386495063	1.445407908	NO	NO	NO	NO
1	78237128	78239032	esv3586529	1904	NONE	0	0	0	0.001	-0.188569517	1.799896728	-0.294833447	0.514785574	NO	NO	NO	NO
1	78312965	78323012	esv3586530	10047	NONE	0	0	0	0	0.555930013	1.555226425	0.968435456	0.355476465	NO	NO	NO	NO
1	78482716	78487913	esv3586533	5197	DNAJB4:1	0	0	0.001	0	1.418380511	1.386795356	0.974656043	-0.426132859	NO	NO	NO	NO
1	78564232	78565625	esv3586534	1393	NONE	0.0038	0	0	0	-0.236150888	0.961017188	1.123413842	1.980687549	NO	NO	NO	NO
1	78649157	78654148	esv3586536	4991	NONE	0.1384	0.0716	0.004	0.1084	2.989356253	3.676816562	5.267152645	9.656698314	NO	NO	NO	NO
1	78833892	78835891	esv3586541	1999	MGC27382:2	0.0628	0.001	0	0	-0.46212326	-1.174303124	-0.823134118	0.466675557	NO	NO	NO	NO
1	78884312	78890077	esv3586544	5765	NONE	0	0	0.004	0	0.194381777	-0.772624838	-0.933479849	-0.808848035	NO	NO	NO	NO
1	78936409	78940574	esv3586545	4165	NONE	0	0	0.002	0	-0.842659572	-0.090220281	-0.731785356	-0.448436838	NO	NO	NO	NO
1	78960283	78964810	esv3586546	4527	PTGFR:1	0.0008	0.001	0	0	0.898545565	-0.20668635	0.245317278	-0.058265202	NO	NO	NO	NO
1	79022250	79032971	esv3586550	10721	NONE	0	0.001	0	0	1.673968836	1.431752388	1.795819024	3.462663493	NO	NO	NO	NO
1	79042110	79043021	esv3586551	911	NONE	0.0015	0	0.002	0	1.252804799	1.155672617	3.672485825	2.865959275	NO	NO	NO	NO
1	79094618	79097570	esv3586552	2952	IFI44L:2	0	0	0	0	1.327491772	0.286648436	0.553288164	-0.990472474	NO	NO	NO	NO
1	79114994	79121552	esv3586554	6558	IFI44:6	0.0008	0	0	0	0.330153422	-0.593481409	-0.145796854	0.135297114	NO	NO	NO	NO
1	79238153	79256666	esv3586558	18513	NONE	0	0	0.001	0	0.558272889	-0.119765056	0.472704918	-0.820718216	NO	NO	NO	NO
1	79278263	79280522	esv3586559	2259	NONE	0	0.001	0	0	0.876180552	0.362741262	0.698872109	0.104577676	NO	NO	NO	NO
1	79365463	79365811	esv3586563	348	NONE	0.0061	0	0	0.0051	0.078349944	3.60338214	4.533667785	-0.479370753	NO	NO	NO	NO
1	79393604	79399527	esv3586564	5923	NONE	0.0862	0.001	0	0	0.941022652	0.569199374	0.617700105	0.174660666	NO	NO	NO	NO
1	79514337	79514819	esv3586569	482	NONE	0.0144	0	0	0	3.329999418	1.515889973	4.818130229	2.053194088	NO	NO	NO	NO
1	79577953	79761532	esv3586571	183579	NONE	0	0	0	0.001	0.201671848	-0.417478847	-0.052049641	-0.39703557	NO	NO	NO	NO
1	79705362	79711902	esv3586573	6540	NONE	0	0	0	0.001	-0.344306211	0.201920052	0.535435919	0.391455066	NO	NO	NO	NO
1	79707595	79711474	esv3586574	3879	NONE	0	0.001	0	0	-0.720643217	-0.110378983	0.465800198	-0.625853741	NO	NO	NO	NO
1	79741153	79744818	esv3586575	3665	NONE	0.0023	0	0	0.001	0.7908738	-0.4977395	0.094147505	0.868454205	NO	NO	NO	NO
1	79786730	79816753	esv3586576	30023	NONE	0	0	0	0.001	0.606414604	-0.62499599	-0.196419937	-0.507454481	NO	NO	NO	NO
1	79855600	79859457	esv3586577	3857	NONE	0	0	0.001	0	-0.083583966	-0.431816789	-0.685934603	-0.726095681	NO	NO	NO	NO
1	79867860	79872908	esv3586578	5048	NONE	0.0008	0	0	0	-0.184599634	-0.095457626	0.511365174	-0.673427142	NO	NO	NO	NO
1	80115072	80117402	esv3586580	2330	NONE	0.0045	0	0	0	0.345205947	-0.273921543	0.983408586	0.556873945	NO	NO	NO	NO
1	80116488	80117280	esv3586581	792	NONE	0.0893	0	0	0	-0.12770556	-0.289944035	1.928946828	1.518104295	NO	NO	NO	NO
1	80192619	80323912	esv3586582	131293	NONE	0	0.001	0	0	0.276585576	-0.694202893	-0.354343219	-0.858708098	NO	NO	NO	NO
1	80219618	80221295	esv3586583	1677	NONE	0.0439	0	0	0	1.316834416	-1.567169236	0.403218961	-1.653204689	NO	NO	NO	NO
1	80221781	80223032	esv3586584	1251	NONE	0.1936	0.4761	0.505	0.365	-14.19413304	-12.903512	-14.03914766	-19.34907469	YES	YES	YES	YES
1	80319677	80322225	esv3586587	2548	NONE	0	0	0	0.0061	0.34933139	-0.67903142	0.242953519	-0.197941659	NO	NO	NO	NO
1	80444355	80444841	esv3586588	486	NONE	0.0008	0	0	0	1.402580979	-1.044674299	2.074400559	2.782881072	NO	NO	NO	NO
1	80504615	80505145	esv3586589	530	NONE	0.003	0	0	0	4.879417475	0.554308834	1.659982968	0.708074429	NO	NO	NO	NO
1	80554065	80558355	esv3586591	4290	NONE	0	0	0.001	0	1.125366005	0.148631505	1.652560934	3.844515241	NO	NO	NO	NO
1	80957969	80967431	esv3586593	9462	NONE	0.0015	0	0	0	1.115381774	0.507715779	0.472315601	0.827890665	NO	NO	NO	NO
1	81066903	81079299	esv3586600	12396	NONE	0	0.001	0	0	0.381866975	0.074974673	-0.223837894	0.485762391	NO	NO	NO	NO
1	81193226	81194660	esv3586602	1434	NONE	0	0	0	0	-1.88887745	-1.168303558	-2.129759999	-1.594622484	NO	NO	NO	NO
1	81332613	81343767	esv3586604	11154	NONE	0.0008	0	0	0	0.669033217	-0.502300931	-0.073985657	-0.366338264	NO	NO	NO	NO
1	81422415	81424642	esv3586607	2227	NONE	0.1044	0.0119	0.0129	0.0613	-1.516264093	-0.38574599	-1.167221124	-15.44698781	NO	NO	NO	YES
1	81436355	81444050	esv3586608	7695	NONE	0.0038	0	0	0	0.478435304	-0.838241653	-0.158061743	-0.268440979	NO	NO	NO	NO
1	81654586	81655431	esv3586611	845	NONE	0	0	0	0.0511	3.657979961	3.946370339	1.661460658	0.912508219	NO	NO	NO	NO
1	81784127	81787360	esv3586612	3233	NONE	0.0008	0	0	0	0.53509237	1.077748722	0.315127484	0.58785765	NO	NO	NO	NO
1	81999569	82008344	esv3586616	8775	NONE	0	0	0.001	0	0.558365729	-0.381718503	-0.132591992	0.111672519	NO	NO	NO	NO
1	82040317	82043929	esv3586617	3612	NONE	0	0	0.001	0	0.77013834	-0.624002059	-0.438174612	0.090965476	NO	NO	NO	NO
1	82305835	82308432	esv3586619	2597	NONE	0	0	0.001	0	1.799832756	-0.439853938	1.333805488	-0.376557616	NO	NO	NO	NO
1	82340644	82346093	esv3586621	5449	NONE	0	0	0.001	0	0.673275063	-0.451890461	0.011854466	-0.10124635	NO	NO	NO	NO
1	82362021	82368237	esv3586623	6216	NONE	0.0008	0	0	0	0.472162587	-0.336201178	0.32391336	0.09276435	NO	NO	NO	NO
1	82382314	82386380	esv3586624	4066	NONE	0.0008	0	0	0	0.707549207	-0.357530118	-0.298116008	-1.611101517	NO	NO	NO	NO
1	82613765	82614972	esv3586625	1207	NONE	0	0.001	0	0	0.859390506	1.088120983	1.017141236	-1.152743792	NO	NO	NO	NO
1	82866208	82870733	esv3586628	4525	NONE	0.0008	0	0	0	0.274546217	-0.53800723	-0.596551922	-0.474714331	NO	NO	NO	NO
1	83041946	83046217	esv3586629	4271	NONE	0	0.001	0	0	1.143020703	-0.392593317	-1.368142322	-0.779981191	NO	NO	NO	NO
1	83106184	83120044	esv3586631	13860	NONE	0.0008	0	0	0	0.595745121	0.02179607	0.589623021	-0.509874926	NO	NO	NO	NO
1	83230032	83241904	esv3586632	11872	NONE	0	0	0	0.001	-0.087015612	-0.629215848	-0.239746028	-0.070878066	NO	NO	NO	NO
1	83284721	83302639	esv3586633	17918	NONE	0	0.001	0	0	0.25477334	-0.561988889	-0.377143518	-1.216428084	NO	NO	NO	NO
1	83293416	83294559	esv3586634	1143	NONE	0	0	0.001	0	1.025161065	-1.676759141	0.537401292	2.397273538	NO	NO	NO	NO
1	83302303	83304303	esv3586635	2000	NONE	0	0	0.006	0	0.479248967	0.545916762	-0.41620677	1.578611216	NO	NO	NO	NO
1	83373489	83375038	esv3586636	1549	NONE	0	0	0.006	0	0.232113221	0.176641116	0.648489282	-0.413142073	NO	NO	NO	NO
1	83403886	83405140	esv3586637	1254	NONE	0.0008	0	0	0	-0.80199614	-0.658707807	-1.347426965	0.972253265	NO	NO	NO	NO
1	83632944	83640826	esv3586639	7882	NONE	0	0	0.0069	0	3.062821835	6.339038894	5.142653122	5.986049411	NO	NO	NO	NO
1	83638058	83649373	esv3586640	11315	NONE	0	0.004	0.001	0	1.443084178	2.003068217	1.921244527	1.932611271	NO	NO	NO	NO
1	83938942	83955355	esv3586645	16413	NONE	0.0008	0	0	0	0.70436814	0.351629427	0.636134075	2.032605594	NO	NO	NO	NO
1	84053937	84057546	esv3586646	3609	NONE	0	0	0	0.001	0.992014569	1.094125783	1.64534794	-0.681030269	NO	NO	NO	NO
1	84056670	84057356	esv3586647	686	NONE	0.0537	0.0577	0.0268	0.0695	2.223261727	0.63551491	3.504378284	1.024140747	NO	NO	NO	NO
1	84108096	84109830	esv3586649	1734	NONE	0	0	0	0.0041	0.107463437	-0.259777855	0.209491618	0.949698732	NO	NO	NO	NO
1	84126145	84127093	esv3586650	948	NONE	0.0129	0.0229	0	0.0082	0.619576754	0.466290726	0.845859095	1.824852688	NO	NO	NO	NO
1	84197809	84200746	esv3586652	2937	NONE	0	0	0.001	0	0.147914959	-0.517705243	0.076576352	-0.554992741	NO	NO	NO	NO
1	84277185	84281001	esv3586654	3816	NONE	0	0	0	0.001	-0.527366405	-0.029583958	0.178947504	-0.220128543	NO	NO	NO	NO
1	84314327	84319118	esv3586655	4791	LOC101927560:1	0	0.001	0	0	-0.594262286	-0.783029215	0.250608164	-1.354119025	NO	NO	NO	NO
1	84388330	84388946	esv3586656	616	NONE	0.0772	0.0328	0.004	0.0072	1.489927506	0.611657249	1.648428919	-0.483856661	NO	NO	NO	NO
1	84517858	84524770	esv3586659	6912	NONE	0.7451	0.7207	0.871	0.684	4.676614822	1.261672935	2.365888289	17.76205404	NO	NO	NO	NO
1	84549197	84561956	esv3586660	12759	NONE	0.0008	0	0	0	-0.268826739	-0.244306504	-1.132305148	-0.760516119	NO	NO	NO	NO
1	84712009	84715872	esv3586662	3863	NONE	0.2595	0.0447	0.3522	0.2188	1.147798913	1.209832399	0.492272286	0.976951396	NO	NO	NO	NO
1	84727741	84728848	esv3586663	1107	NONE	0.0015	0	0	0	0.431273202	-1.038296705	-0.448055476	0.647362039	NO	NO	NO	NO
1	84882972	84884736	esv3586665	1764	NONE	0.0174	0	0	0	0.172664557	1.935679473	2.065368912	1.64716315	NO	NO	NO	NO
1	84895841	84899486	esv3586666	3645	NONE	0.0008	0	0	0	-0.337886728	-0.446172539	-1.797350809	-1.306376466	NO	NO	NO	NO
1	85262552	85263665	esv3586672	1113	NONE	0	0	0	0	0.599104353	0.000546305	0.904848125	0.070872388	NO	NO	NO	NO
1	85310917	85311615	esv3586674	698	NONE	0	0	0	0.002	2.411094077	2.675628426	2.583767944	1.934574631	NO	NO	NO	NO
1	85585918	85595370	esv3586677	9452	WDR63:4	0	0	0.001	0	-0.574815308	0.064961597	-0.884461326	0.19654905	NO	NO	NO	NO
1	85910957	85915409	esv3586682	4452	NONE	0	0	0.005	0	-0.645942274	-0.151690816	-0.432989196	-0.0191279	NO	NO	NO	NO
1	86254683	86259203	esv3586688	4520	NONE	0.0008	0	0	0	1.863478432	1.312707355	0.077349042	0.264341149	NO	NO	NO	NO
1	86273427	86280455	esv3586689	7028	NONE	0	0	0	0	-0.900930381	-1.030238505	-0.793624892	-0.184283807	NO	NO	NO	NO
1	86400829	86404534	esv3586692	3705	NONE	0.1089	0.1262	0.2302	0.316	-14.21039094	-12.99278412	-14.09960827	-19.33660028	YES	YES	YES	YES
1	86666225	86667347	esv3586694	1122	NONE	0	0.002	0	0	-0.719932378	0.68851359	-0.602384997	0.056915124	NO	NO	NO	NO
1	86728525	86757948	esv3586697	29423	NONE	0	0.001	0	0	-0.056797604	0.026196835	-0.360740818	0.173528327	NO	NO	NO	NO
1	86994125	86994526	esv3586699	401	NONE	0.0386	0	0	0	2.196216716	3.036651834	4.203364071	4.803496021	NO	NO	NO	NO
1	87028195	87039346	esv3586701	11151	CLCA4:6|CLCA4-AS1:1	0.0008	0.005	0	0	-0.035356782	-0.61478123	-0.242293489	-0.292925387	NO	NO	NO	NO
1	87096974	87098443	esv3586704	1469	NONE	0.0083	0	0.0268	0.002	3.327034517	4.762205301	4.520398767	11.0716891	NO	NO	NO	NO
1	87096990	87101662	esv3586705	4672	CLCA3P:3	0	0	0.0268	0.002	2.013851832	2.617239946	2.722108969	4.613428886	NO	NO	NO	NO
1	87105301	87109485	esv3586706	4184	CLCA3P:1	0	0	0	0.001	1.467749443	0.210236202	0.456607251	0.097201345	NO	NO	NO	NO
1	87218375	87231214	esv3586707	12839	NONE	0	0	0.001	0	-1.114654025	-0.492506498	-0.925065934	-0.249856421	NO	NO	NO	NO
1	87298247	87300663	esv3586708	2416	NONE	0.0008	0	0.001	0	0.28265854	1.102698009	-0.269168112	-0.239181585	NO	NO	NO	NO
1	87299922	87300846	esv3586709	924	NONE	0	0.001	0	0	1.051472547	1.528539911	0.771064393	1.727695875	NO	NO	NO	NO
1	87523395	87524655	esv3586712	1260	NONE	0.0424	0	0	0	1.003641097	1.769985678	1.375073168	2.083278832	NO	NO	NO	NO
1	88161975	88167552	esv3586718	5577	NONE	0.0008	0	0	0	-0.067306955	0.139516932	0.599426845	0.91969275	NO	NO	NO	NO
1	88189369	88195014	esv3586719	5645	NONE	0	0	0.001	0	0.584487478	0.719502628	0.913559011	1.532846954	NO	NO	NO	NO
1	88337181	88342451	esv3586721	5270	NONE	0.0023	0	0	0	-0.360228378	-0.192006932	-0.937063057	0.222339287	NO	NO	NO	NO
1	88412319	88412936	esv3586723	617	NONE	0.0008	0	0	0	2.329594269	1.687954153	0.389276025	2.147909833	NO	NO	NO	NO
1	88902490	88903981	esv3586732	1491	NONE	0.0015	0	0	0	2.928520119	2.140978787	3.201154813	0.355324003	NO	NO	NO	NO
1	88935008	88938211	esv3586733	3203	NONE	0	0.001	0	0	0.796405081	-0.548651604	-0.22043517	0.438033102	NO	NO	NO	NO
1	89044606	89051743	esv3586734	7137	NONE	0	0.001	0	0	-0.274808045	-0.053814953	-0.302898248	-0.596832146	NO	NO	NO	NO
1	89046691	89049544	esv3586735	2853	NONE	0.0008	0.001	0	0	-1.022334322	-0.660288464	-0.477380574	-0.475375418	NO	NO	NO	NO
1	89054332	89060264	esv3586736	5932	NONE	0	0	0.001	0	0.538902494	0.534219924	0.450191924	-0.037528498	NO	NO	NO	NO
1	89075517	89076815	esv3586737	1298	NONE	0.0038	0	0	0	1.486887371	2.281860029	2.040830279	0.680350457	NO	NO	NO	NO
1	89088863	89150718	esv3586738	61855	PKN2:2	0	0.001	0	0	-0.529781666	0.243303661	-0.576481048	-0.367177224	NO	NO	NO	NO
1	89094521	89095354	esv3586739	833	NONE	0.028	0.0268	0.0675	0.0634	2.084303613	0.250490234	-0.215387645	1.302439357	NO	NO	NO	NO
1	89223931	89251098	esv3586743	27167	PKN2:6	0	0.001	0	0	0.330390741	0.577584226	-0.156842169	-0.476281129	NO	NO	NO	NO
1	89257880	89259822	esv3586746	1942	NONE	0	0.001	0	0	-0.13620633	0.985374278	0.557674824	-0.185892595	NO	NO	NO	NO
1	89337552	89339024	esv3586748	1472	NONE	0	0	0	0.002	-0.649977481	2.466849721	-0.935203309	0.366332574	NO	NO	NO	NO
1	89359515	89360947	esv3586749	1432	NONE	0	0	0.001	0	1.999472736	0.845039742	0.428861218	2.571472574	NO	NO	NO	NO
1	89380082	89385146	esv3586750	5064	NONE	0	0.002	0	0	-0.571575875	1.390138428	0.347275008	-0.780312802	NO	NO	NO	NO
1	89475930	89478613	esv3586751	2683	GBP3:3	0.0461	0.3201	0.2034	0.2495	0.433976491	0.836665995	-0.680988013	1.430517443	NO	NO	NO	NO
1	89585673	89592460	esv3586753	6787	GBP2:4	0	0	0	0.001	-0.305011612	-1.357820082	-1.438989947	-0.384759541	NO	NO	NO	NO
1	89677611	89681145	esv3586756	3534	NONE	0	0	0	0.0061	0.705357733	0.034324724	0.652019332	0.409481282	NO	NO	NO	NO
1	89716927	89726850	esv3586757	9923	GBP5:1	0	0	0	0.001	0.183293328	-0.279018535	-0.089181468	-0.54749299	NO	NO	NO	NO
1	89767760	89768510	esv3586761	750	NONE	0.0068	0	0	0	0.086393324	2.995735545	2.302620558	3.548627524	NO	NO	NO	NO
1	89811425	89812284	esv3586762	859	NONE	0.0908	0.1491	0.0208	0.1708	0.189666566	-0.078806629	0.208847387	0.393616146	NO	NO	NO	NO
1	89868156	89868964	esv3586764	808	NONE	0.0015	0	0	0	0.727761765	2.838388495	1.691508244	4.325658289	NO	NO	NO	NO
1	89974783	89976646	esv3586767	1863	NONE	0.0008	0	0	0	2.231244376	0.637901354	1.929350493	4.417437031	NO	NO	NO	NO
1	90022074	90022848	esv3586768	774	NONE	0.003	0	0	0	-0.222333348	1.649191718	2.34673946	4.025303655	NO	NO	NO	NO
1	90069767	90075314	esv3586770	5547	NONE	0	0	0	0	-1.393680748	-1.190334544	-1.163803233	-0.710830493	NO	NO	NO	NO
1	90169024	90174196	esv3586771	5172	NONE	0.0204	0	0	0	0.818696523	1.382976811	1.540622633	1.385816274	NO	NO	NO	NO
1	90602307	90604628	esv3586775	2321	NONE	0	0	0	0.002	0.188447352	2.020549576	1.199096762	1.169721232	NO	NO	NO	NO
1	90658386	90659855	esv3586776	1469	NONE	0	0	0	0.0031	-0.546531481	0.85493699	-0.727918525	0.461408697	NO	NO	NO	NO
1	90865363	90870515	esv3586777	5152	NONE	0	0.001	0	0	-0.187097722	-0.715081928	-0.325057393	-0.500825094	NO	NO	NO	NO
1	91006622	91037791	esv3586780	31169	NONE	0	0	0	0.0031	-0.033122219	0.039899911	0.091358944	1.162992925	NO	NO	NO	NO
1	91279119	91288525	esv3586784	9406	NONE	0	0	0.001	0	-0.747652236	-0.064438924	0.060117658	-0.001166116	NO	NO	NO	NO
1	91500251	91507853	esv3586786	7602	NONE	0	0	0	0.001	-0.687922977	0.336719092	0.309678876	0.245900573	NO	NO	NO	NO
1	91561080	91562174	esv3586787	1094	NONE	0.1165	0.0567	0.1687	0.0153	0.810384259	1.118163681	0.773944969	-0.139007626	NO	NO	NO	NO
1	91878937	91880030	esv3586792	1093	NONE	0	0	0	0.0072	1.986895396	0.142876871	-0.271937356	-0.231291434	NO	NO	NO	NO
1	91935365	91943856	esv3586793	8491	NONE	0.0008	0	0	0	-1.085941977	-0.54092775	-0.854621796	-0.195789636	NO	NO	NO	NO
1	92232051	92233331	esv3586795	1280	NONE	0.3253	0.3091	0.0556	0.409	-0.202110038	-0.03388545	0.614727882	-0.350919587	NO	NO	NO	NO
1	92348271	92349875	esv3586797	1604	NONE	0	0	0	0	0.921854487	2.125542561	0.386969037	0.232132256	NO	NO	NO	NO
1	92383248	92384147	esv3586799	899	NONE	0.0113	0	0	0	-0.647124751	0.521014372	-0.432162452	1.782539716	NO	NO	NO	NO
1	92386763	92389158	esv3586800	2395	NONE	0	0	0.001	0	-0.19538218	-0.541691173	-1.141785402	-0.438555548	NO	NO	NO	NO
1	92393427	92397677	esv3586801	4250	NONE	0.0008	0	0	0	-0.465337762	0.422574471	-0.736393213	-0.631028212	NO	NO	NO	NO
1	92483035	92484013	esv3586803	978	NONE	0	0.003	0	0	-0.521267589	-0.360491499	0.316728637	0.802690683	NO	NO	NO	NO
1	92579191	92585021	esv3586804	5830	NONE	0.0197	0.001	0	0	-0.120774011	-0.248568984	-0.894070099	-0.137273733	NO	NO	NO	NO
1	92892965	92901360	esv3586809	8395	NONE	0	0.008	0	0	2.344362719	3.815670671	3.093660118	6.439419284	NO	NO	NO	NO
1	93038094	93041744	esv3586812	3650	NONE	0	0	0	0	0.788017358	-0.167529733	0.297930181	1.314326233	NO	NO	NO	NO
1	93152762	93154265	esv3586814	1503	NONE	0	0.001	0	0	2.875344929	4.24601724	4.383165819	6.221862144	NO	NO	NO	NO
1	93184649	93186054	esv3586816	1405	NONE	0.0159	0.001	0	0	3.74468674	7.187614744	6.927411923	6.959219	NO	NO	NO	NO
1	93187858	93193071	esv3586817	5213	NONE	0	0	0.001	0	0.490002006	1.732455283	1.086773698	0.47616891	NO	NO	NO	NO
1	93205828	93208803	esv3586818	2975	NONE	0	0	0	0.001	0.512055715	1.88488366	2.218831719	1.196617169	NO	NO	NO	NO
1	93236096	93237919	esv3586819	1823	NONE	0	0.008	0	0.0082	0.708796372	1.926287432	1.611626106	2.392139283	NO	NO	NO	NO
1	93276434	93280966	esv3586820	4532	NONE	0	0	0.001	0	-0.61779088	0.44741953	-0.690572408	-0.318400703	NO	NO	NO	NO
1	93291972	93292789	esv3586821	817	NONE	0.0174	0.1928	0.2143	0.2474	1.078720472	5.85177633	1.192465864	0.679481436	NO	NO	NO	NO
1	93357476	93361554	esv3586822	4078	NONE	0.0113	0	0.0069	0	3.95483648	5.235045939	5.989956774	9.242559432	NO	NO	NO	NO
1	93682289	93701358	esv3586825	19069	CCDC18:6	0	0.001	0	0	0.460873453	0.909819615	0.109155267	-0.469571106	NO	NO	NO	NO
1	93698753	93721906	esv3586826	23153	CCDC18:7	0	0	0	0.001	0.079787545	0.728526821	0.476692929	-0.459842048	NO	NO	NO	NO
1	93804052	93807125	esv3586828	3073	CCDC18-AS1:4	0.0045	0	0	0	0.36373656	-0.404798034	-0.533623277	0.107036513	NO	NO	NO	NO
1	94212821	94213586	esv3586831	765	NONE	0.0537	0.001	0	0	-0.608325661	0.050471126	0.89773631	1.840101583	NO	NO	NO	NO
1	94288372	94291260	esv3586832	2888	NONE	0.0809	0.3181	0.5258	0.5133	-2.058924278	-1.2360772	-2.522685739	-1.135754744	NO	NO	NO	NO
1	94296355	94302703	esv3586833	6348	NONE	0.003	0	0	0	-0.36369188	1.631060911	0.465014084	1.604654237	NO	NO	NO	NO
1	94686401	94690510	esv3586835	4109	NONE	0	0.001	0	0	0.082586908	-0.088539642	-0.105354533	0.659262688	NO	NO	NO	NO
1	95065916	95066547	esv3586837	631	NONE	0	0	0	0	-0.202839638	-1.492632051	-0.878275357	-0.236868692	NO	NO	NO	NO
1	95104359	95109624	esv3586838	5265	NONE	0	0	0.001	0	-0.990392094	-1.656138383	-0.635371501	-0.063363939	NO	NO	NO	NO
1	95129016	95155122	esv3586840	26106	SLC44A3-AS1:2	0.0265	0	0	0	-0.164829778	-0.457798607	-0.255423996	-0.612662322	NO	NO	NO	NO
1	95522242	95526087	esv3586846	3845	NONE	0.0008	0	0.1002	0.002	-0.330824221	0.687291126	-0.8244859	-1.126091652	NO	NO	NO	NO
1	95542471	95543998	esv3586848	1527	NONE	0	0	0	0	0.323389858	0.270438196	-0.784489087	-0.584556037	NO	NO	NO	NO
1	95891710	95895300	esv3586853	3590	NONE	0.0068	0	0	0	-0.234169767	-0.453318563	-0.870007773	0.501068752	NO	NO	NO	NO
1	95901860	95906526	esv3586854	4666	NONE	0	0	0.001	0	-0.565794613	-0.399320839	-0.404782282	-0.18162992	NO	NO	NO	NO
1	96719863	96726519	esv3586860	6656	LINC01787:1	0	0	0	0	0.399922347	0.307870991	-0.014642571	0.027127056	NO	NO	NO	NO
1	96901851	96905466	esv3586864	3615	NONE	0	0.001	0.001	0	3.131330201	5.892501907	5.463437818	5.57231739	NO	NO	NO	NO
1	96952599	96955555	esv3586867	2956	NONE	0.0023	0	0	0	-0.182797848	0.003462553	0.432582096	0.489099709	NO	NO	NO	NO
1	96996364	96997214	esv3586868	850	NONE	0.0303	0.001	0	0.001	1.623152162	0.881058949	-0.456108424	4.799381647	NO	NO	NO	NO
1	97075990	97121868	esv3586869	45878	NONE	0.0008	0	0	0	0.33678014	0.490261929	0.646048977	0.906218975	NO	NO	NO	NO
1	97390754	97395521	esv3586872	4767	NONE	0	0	0	0.0072	0.201867295	-0.219090951	-0.155599138	-0.405534423	NO	NO	NO	NO
1	97403431	97416937	esv3586873	13506	NONE	0	0	0	0	0.197183939	-0.232467453	0.06092563	-0.330166657	NO	NO	NO	NO
1	97686968	97687863	esv3586876	895	NONE	0	0	0.001	0	2.603879222	1.433701461	3.400417144	1.474635542	NO	NO	NO	NO
1	97884744	97887641	esv3586880	2897	NONE	0	0	0	0	-0.17143938	-0.329729948	0.170871974	0.052045956	NO	NO	NO	NO
1	98037828	98042715	esv3586882	4887	DPYD:1	0.0008	0	0	0	1.130225116	0.39275081	0.968870133	0.634763697	NO	NO	NO	NO
1	98120605	98122233	esv3586886	1628	NONE	0.0008	0	0	0	0.841940632	0.951771155	1.391462254	1.369065734	NO	NO	NO	NO
1	98170568	98178583	esv3586888	8015	NONE	0	0	0.001	0	1.618435364	0.935308821	1.461196311	2.124105164	NO	NO	NO	NO
1	98177077	98186218	esv3586889	9141	DPYD:1	0	0	0	0.001	1.22163106	1.214002817	1.07435728	-0.466636389	NO	NO	NO	NO
1	98200339	98214191	esv3586891	13852	DPYD:1	0	0.001	0	0	0.585836443	0.049235917	0.61249588	-0.577020532	NO	NO	NO	NO
1	98698424	98706000	esv3586898	7576	NONE	0.0091	0	0	0	0.511548328	0.684671414	0.127982647	-0.120095488	NO	NO	NO	NO
1	98797989	98814712	esv3586899	16723	NONE	0	0	0.001	0	0.046399772	-0.421562816	-0.141428891	-0.103221095	NO	NO	NO	NO
1	98817896	98820566	esv3586900	2670	NONE	0.0008	0	0	0	0.478973085	-0.610732775	-0.367316583	1.112125161	NO	NO	NO	NO
1	98903485	98904146	esv3586902	661	NONE	0	0.0109	0	0.0389	1.935407633	0.224756347	2.321709825	0.587182665	NO	NO	NO	NO
1	98973787	98975234	esv3586903	1447	NONE	0	0.005	0	0	2.503205537	2.076657688	3.227135653	0.515338221	NO	NO	NO	NO
1	99003402	99007923	esv3586904	4521	NONE	0	0	0.001	0	1.244805872	0.349141027	0.828047997	-0.280648313	NO	NO	NO	NO
1	99044269	99044759	esv3586906	490	NONE	0.0083	0.0755	0	0.0849	2.851415565	2.574441061	2.076623734	-1.814505077	NO	NO	NO	NO
1	99191795	99202890	esv3586908	11095	NONE	0.0008	0	0	0	-0.213105991	0.553390368	0.135326724	0.44672722	NO	NO	NO	NO
1	99533278	99536657	esv3586913	3379	NONE	0	0	0	0.0051	0.240828086	0.867490305	-0.155268404	0.147773493	NO	NO	NO	NO
1	99540033	99540483	esv3586914	450	NONE	0.0045	0	0	0	3.900366856	3.965308397	1.464361422	6.255452191	NO	NO	NO	NO
1	99684273	99691629	esv3586917	7356	NONE	0.0008	0	0	0	-0.081695858	-0.000881694	0.052628534	0.006726995	NO	NO	NO	NO
1	99690125	99696674	esv3586918	6549	NONE	0	0.001	0	0	0.159288922	-0.906207766	-0.278062364	-0.16201521	NO	NO	NO	NO
1	99854690	99865880	esv3586921	11190	NONE	0.0008	0	0	0	1.581390728	0.729192757	1.258552067	2.819881727	NO	NO	NO	NO
1	99885175	99888573	esv3586922	3398	NONE	0.0008	0	0	0	0.754684359	1.712037866	1.324266381	0.969582741	NO	NO	NO	NO
1	99890888	99891651	esv3586923	763	NONE	0.0877	0	0	0	1.165748756	-0.27599452	0.156695674	1.370839854	NO	NO	NO	NO
1	100036838	100040030	esv3586926	3192	NONE	0	0	0.001	0.001	0.462495372	0.231030302	0.377145626	-1.263263463	NO	NO	NO	NO
1	100225497	100232186	esv3586928	6689	FRRS1:2	0	0.001	0	0	0.381604019	-0.068448587	0.048948693	-0.21885077	NO	NO	NO	NO
1	100390343	100394302	esv3586932	3959	NONE	0	0	0	0	0.18756556	0.093122933	-0.256766085	-0.338814198	NO	NO	NO	NO
1	100748977	100750084	esv3586936	1107	NONE	0	0	0	0	1.928436474	2.176010641	0.239434187	-2.212061751	NO	NO	NO	NO
1	100779694	100780650	esv3586937	956	NONE	0	0.0089	0	0.0041	2.843317383	0.618850366	0.754582436	2.317189205	NO	NO	NO	NO
1	100794898	100797343	esv3586939	2445	NONE	0	0	0.002	0	0.198013735	-0.477436226	0.918965181	-1.188424896	NO	NO	NO	NO
1	101037986	101039681	esv3586945	1695	NONE	0.0545	0	0	0	-0.567424501	0.984698668	-0.884091629	2.034312304	NO	NO	NO	NO
1	101050768	101053114	esv3586946	2346	NONE	0	0	0	0	-0.517270565	-0.270930249	-1.137074084	1.137571456	NO	NO	NO	NO
1	101119949	101122359	esv3586949	2410	NONE	0.0832	0	0	0	-1.239392588	-1.82369343	-1.319156848	-0.12478301	NO	NO	NO	NO
1	101215145	101218062	esv3586951	2917	NONE	0	0	0	0	1.131991008	0.250899912	0.718938015	-1.002170472	NO	NO	NO	NO
1	101221631	101222283	esv3586952	652	NONE	0	0	0	0	0.326053343	-0.176411836	0.367478908	2.584862033	NO	NO	NO	NO
1	101231398	101232439	esv3586953	1041	NONE	0	0	0.006	0.0153	-0.286578955	-0.722909063	-0.593461134	-1.964223465	NO	NO	NO	NO
1	101318710	101320209	esv3586955	1499	NONE	0.0008	0	0	0.002	2.675941654	1.09898436	1.209919857	-0.178198456	NO	NO	NO	NO
1	101452565	101458505	esv3586958	5940	DPH5:3	0	0	0.001	0	0.326471773	0.227075911	-0.600091234	-0.137910098	NO	NO	NO	NO
1	101616199	101617458	esv3586962	1259	NONE	0	0.001	0	0	1.323096803	0.890163089	0.914364468	0.668262705	NO	NO	NO	NO
1	101637514	101639859	esv3586964	2345	NONE	0	0	0	0	0.179738422	-0.139023324	-1.103283411	-0.921118848	NO	NO	NO	NO
1	101684437	101688182	esv3586966	3745	NONE	0.0008	0	0	0	-0.941541788	-0.466622468	-0.334853341	-0.646774769	NO	NO	NO	NO
1	101693230	101699110	esv3586967	5880	NONE	0.0008	0	0.003	0.0072	1.20407765	2.408747266	1.857154707	2.580723282	NO	NO	NO	NO
1	101695346	101697782	esv3586968	2436	NONE	0.003	0.0348	0.0585	0.1063	3.381881268	5.481410764	3.555662571	5.622959132	NO	NO	NO	NO
1	101722704	101724071	esv3586969	1367	NONE	0.0008	0.006	0	0.001	-0.032709902	-1.111622707	-2.216032854	0.307730499	NO	NO	NO	NO
1	101848109	101858517	esv3586971	10408	NONE	0	0	0.002	0	-0.639486552	-0.755130432	-0.552696444	-0.082183444	NO	NO	NO	NO
1	101979071	101986917	esv3586973	7846	NONE	0.0045	0	0	0	0.545079576	-0.082998811	0.659807193	-1.021134167	NO	NO	NO	NO
1	102082628	102085716	esv3586974	3088	NONE	0.0008	0	0	0	1.001312515	-0.143969268	0.05364239	-1.441342298	NO	NO	NO	NO
1	102096674	102098787	esv3586975	2113	NONE	0.0242	0	0	0	-0.74746044	-1.124616066	-1.889238874	-0.893770549	NO	NO	NO	NO
1	102097881	102098558	esv3586976	677	NONE	0.0234	0.001	0	0	-0.492481206	0.379761778	0.122873098	-0.064566746	NO	NO	NO	NO
1	102288334	102289585	esv3586979	1251	NONE	0	0.0139	0.001	0.0041	2.174852076	-0.747450893	0.534902062	1.213465975	NO	NO	NO	NO
1	102321436	102326963	esv3586980	5527	NONE	0.0121	0	0	0	0.62277153	-0.411574345	-0.140785924	-0.026712871	NO	NO	NO	NO
1	102325353	102327002	esv3586981	1649	NONE	0.0121	0.006	0	0	0.356541138	-0.819505398	0.129423515	1.322274819	NO	NO	NO	NO
1	102350204	102358509	esv3586982	8305	NONE	0	0	0	0.002	1.553201229	0.892460154	1.551882061	0.713672761	NO	NO	NO	NO
1	102353740	102363553	esv3586983	9813	DNAJA1P5:1	0	0	0	0.002	1.043813812	0.542120207	1.158118785	0.914151151	NO	NO	NO	NO
1	102401541	102411994	esv3586984	10453	NONE	0.0008	0	0	0	-0.2128124	-0.996595551	-0.902666413	-0.13501328	NO	NO	NO	NO
1	102436452	102441841	esv3586985	5389	NONE	0	0	0	0	0.479700033	-0.397836686	-0.057122586	-0.896701688	NO	NO	NO	NO
1	102485282	102495599	esv3586986	10317	NONE	0.0061	0	0	0	0.842653288	-0.471985279	0.180243515	-1.087872817	NO	NO	NO	NO
1	102587297	102589565	esv3586988	2268	NONE	0.0008	0	0	0	0.287497999	-0.232214386	-0.264796068	-1.739800076	NO	NO	NO	NO
1	102656055	102861233	esv3586989	205178	NONE	0	0.001	0	0.001	0.480816394	-0.118604814	0.205711153	-0.033862334	NO	NO	NO	NO
1	102656092	102699682	esv3586990	43590	NONE	0	0.003	0	0.001	0.39768005	-0.332268087	0.090693755	-0.082892454	NO	NO	NO	NO
1	102674049	102678229	esv3586991	4180	NONE	0	0.003	0	0.001	0.139318404	-0.319219937	-0.51887821	0.269303646	NO	NO	NO	NO
1	102983325	102984827	esv3586994	1502	NONE	0.152	0	0	0	0.97427454	-0.02921443	0.9368145	-0.16339201	NO	NO	NO	NO
1	103073101	103106588	esv3586996	33487	NONE	0	0	0.001	0	0.1633518	-0.141682454	0.014282061	-0.015664634	NO	NO	NO	NO
1	103156910	103158823	esv3586998	1913	NONE	0	0	0	0	1.871635229	0.224186854	0.764063223	-0.898816028	NO	NO	NO	NO
1	103554346	103570958	esv3587002	16612	NONE	0	0	0	0.001	0.143422664	-0.539750221	-1.465726447	-0.639477587	NO	NO	NO	NO
1	103729666	103736950	esv3587008	7284	NONE	0	0	0.001	0	-0.447594252	-0.208967838	0.07537919	1.365497621	NO	NO	NO	NO
1	103770267	103776258	esv3587010	5991	NONE	0	0	0.001	0	0.756837282	-0.027555051	0.438492014	-0.730576347	NO	NO	NO	NO
1	104037601	104040165	esv3587011	2564	NONE	0.0008	0	0	0	1.355704697	1.589617742	0.694861698	-0.255740202	NO	NO	NO	NO
1	104359763	104361471	esv3587018	1708	NONE	0	0	0	0.0307	-1.029064841	-0.188736222	-0.501099493	-1.742117023	NO	NO	NO	NO
1	104384840	104385513	esv3587019	673	NONE	0.0083	0	0	0	3.558211287	2.001797139	2.518822844	-0.18733349	NO	NO	NO	NO
1	104406147	104415883	esv3587020	9736	NONE	0	0	0	0.0041	1.251654568	1.650495852	2.095239968	1.964361607	NO	NO	NO	NO
1	104412003	104419956	esv3587021	7953	NONE	0.0015	0	0	0	1.496129717	1.505237395	1.778818854	1.53174919	NO	NO	NO	NO
1	104443176	104443721	esv3587022	545	NONE	0.2519	0.3996	0.1706	0.2495	3.164137961	2.161231006	2.437810587	1.402348211	NO	NO	NO	NO
1	104503597	104515248	esv3587024	11651	NONE	0	0	0	0.0164	1.410812251	0.206715168	0.587341572	-1.257213917	NO	NO	NO	NO
1	104668206	104702879	esv3587028	34673	NONE	0	0	0.001	0	-0.063265125	-0.410514338	-0.375461553	-0.911316204	NO	NO	NO	NO
1	104677145	104678373	esv3587031	1228	NONE	0.0008	0.007	0	0.001	1.601910746	-0.137155146	0.514439789	4.994386525	NO	NO	NO	NO
1	104704220	104720184	esv3587034	15964	NONE	0	0	0	0.001	0.072317064	-0.670502413	-0.335382457	-0.374300924	NO	NO	NO	NO
1	104706647	104708051	esv3587035	1404	NONE	0.0567	0	0	0	-0.78053331	-1.245813801	-0.999886644	-0.984207913	NO	NO	NO	NO
1	104746615	104751173	esv3587036	4558	NONE	0	0	0.001	0	0.462700419	-0.647346559	-0.237671861	-0.673827671	NO	NO	NO	NO
1	104789494	104790112	esv3587037	618	NONE	0.0045	0	0	0	1.676648174	0.327468133	1.971942963	-0.221147964	NO	NO	NO	NO
1	104793839	104794419	esv3587038	580	NONE	0.003	0	0	0.002	2.03627812	-0.109202223	0.29292851	0.211459045	NO	NO	NO	NO
1	104861940	104865188	esv3587039	3248	NONE	0	0	0.002	0	1.310559568	0.373346799	1.012169845	1.321721221	NO	NO	NO	NO
1	104947505	104948151	esv3587040	646	NONE	0	0.001	0	0	4.197846554	1.582687083	1.936966377	-0.125400686	NO	NO	NO	NO
1	105009569	105010916	esv3587042	1347	NONE	0	0.001	0	0	-1.663903245	-1.893178374	-0.859004803	-1.391502005	NO	NO	NO	NO
1	105053383	105081870	esv3587047	28487	NONE	0.0008	0	0	0	0.943105162	-0.058650859	0.536458229	-0.809580461	NO	NO	NO	NO
1	105091218	105092753	esv3587051	1535	NONE	0.0023	0	0	0	0.858108328	0.187098765	0.697669756	-0.891843398	NO	NO	NO	NO
1	105199035	105201509	esv3587053	2474	NONE	0	0.002	0.001	0.0153	0.762933933	-1.164423035	-0.47533662	-0.852150777	NO	NO	NO	NO
1	105218662	105219460	esv3587054	798	NONE	0.003	0.0716	0	0.0041	4.818199236	-0.120642455	-6.029217475	0.958559441	NO	NO	YES	NO
1	105255038	105256195	esv3587056	1157	NONE	0.3071	0.0785	0.5159	0.2188	2.36557997	-0.679685205	0.845285906	-1.365149496	NO	NO	NO	NO
1	105261231	105265158	esv3587057	3927	NONE	0	0	0	0.001	0.710321764	0.809865707	1.179728782	0.082423227	NO	NO	NO	NO
1	105269141	105269597	esv3587058	456	NONE	0.0295	0	0	0	1.760552815	2.069018111	4.596222943	2.753591505	NO	NO	NO	NO
1	105557152	105559031	esv3587061	1879	NONE	0.0038	0	0	0	1.785182977	1.096021619	0.999575013	-0.008216742	NO	NO	NO	NO
1	105625044	105630925	esv3587062	5881	NONE	0.0129	0	0	0	-1.682505006	-5.153279512	-5.156137048	-0.495757551	NO	YES	YES	NO
1	105667567	105668446	esv3587063	879	NONE	0.174	0.1034	0.1538	0.1207	-0.940076123	-1.145518643	1.386814547	1.081087227	NO	NO	NO	NO
1	105832823	105844373	esv3587064	11550	NONE	0	0	0.0238	0.001	0.972550655	0.317337915	0.739550891	0.03303954	NO	NO	NO	NO
1	105898516	105900757	esv3587067	2241	NONE	0	0	0.001	0	1.739036301	1.198394644	1.719211571	0.887646088	NO	NO	NO	NO
1	106012275	106235113	esv3587070	222838	LINC01676:6	0	0	0.001	0	0.433346642	-0.099148589	0.194527885	-0.184116177	NO	NO	NO	NO
1	106015797	106023398	esv3587071	7601	NONE	0.4834	0.3111	0.5099	0.3016	0.726337516	-0.285686921	0.559723683	-1.512161756	NO	NO	NO	NO
1	106059379	106071956	esv3587075	12577	NONE	0	0	0.001	0.001	-5.62572327	-0.942780358	-5.292158823	-0.266661967	YES	NO	YES	NO
1	106080808	106134781	esv3587076	53973	LINC01676:1	0	0	0.001	0	1.141816189	0.27568226	0.734061296	0.737641907	NO	NO	NO	NO
1	106135139	106137443	esv3587077	2304	NONE	0	0.004	0	0	0.136779107	-0.625895572	0.149411339	-0.83438051	NO	NO	NO	NO
1	106164389	106215453	esv3587078	51064	NONE	0.0234	0	0.001	0	0.727372572	-0.087920056	0.56799535	0.454867508	NO	NO	NO	NO
1	106225844	106259868	esv3587079	34024	NONE	0	0	0.001	0	0.650016297	-0.081833624	0.336531147	-0.606637423	NO	NO	NO	NO
1	106307493	106317948	esv3587080	10455	NONE	0.0507	0	0	0	0.89059898	-0.093362375	0.370250635	-1.161974027	NO	NO	NO	NO
1	106404288	106408060	esv3587083	3772	NONE	0	0.002	0	0	0.9192978	0.689684644	0.548414655	0.185085904	NO	NO	NO	NO
1	106419678	106421713	esv3587084	2035	NONE	0	0	0.001	0	1.79663052	0.717594367	1.281707	-0.023966245	NO	NO	NO	NO
1	106541721	106542208	esv3587086	487	NONE	0	0.003	0	0	3.449715587	2.757812214	1.905097475	-0.471568774	NO	NO	NO	NO
1	106606805	106608626	esv3587088	1821	NONE	0	0	0	0.002	1.45358112	1.163486175	2.464850194	0.325838608	NO	NO	NO	NO
1	106784431	106903735	esv3587089	119304	NONE	0	0	0.001	0	0.581609457	0.372209035	0.977176385	0.248900418	NO	NO	NO	NO
1	106868862	106962829	esv3587091	93967	NONE	0.0008	0	0	0	0.521147469	0.144081194	0.698214133	0.091451381	NO	NO	NO	NO
1	106978443	106981592	esv3587093	3149	NONE	0.087	0	0	0	0.964696718	-0.179186803	0.145347762	-0.238381063	NO	NO	NO	NO
1	106982462	106987679	esv3587094	5217	NONE	0	0	0.001	0	0.623251796	0.015986686	0.979916091	-0.314840175	NO	NO	NO	NO
1	106984630	106988338	esv3587095	3708	NONE	0	0	0.001	0	0.703249788	-0.260864908	0.642307773	-0.253565544	NO	NO	NO	NO
1	106987177	106997232	esv3587096	10055	NONE	0	0	0	0.002	0.728947213	0.083843327	0.818154433	-1.027122177	NO	NO	NO	NO
1	107081794	107082334	esv3587097	540	NONE	0.0378	0.001	0	0	-13.85998199	-12.44526123	-11.80807489	-8.272954329	YES	YES	YES	YES
1	107095671	107101397	esv3587098	5726	NONE	0.0567	0	0	0	-0.027317664	0.032440727	0.041014453	-0.870631849	NO	NO	NO	NO
1	107220681	107224674	esv3587099	3993	NONE	0.0673	0	0	0	-0.200150003	-0.867668516	-1.12957146	-0.050218909	NO	NO	NO	NO
1	107403124	107405351	esv3587100	2227	NONE	0.0091	0	0	0	0.997518085	1.078878339	0.586044622	-0.819512142	NO	NO	NO	NO
1	107488199	107488845	esv3587101	646	NONE	0	0	0.0109	0	1.774805995	-1.138580915	1.475971659	1.177123609	NO	NO	NO	NO
1	107655107	107663859	esv3587103	8752	NONE	0.0008	0.0129	0	0	-0.338455904	-0.834790102	-0.863122374	0.126526131	NO	NO	NO	NO
1	107759242	107763239	esv3587106	3997	NONE	0.0008	0	0	0	0.780727832	0.529643621	1.133938773	0.431567063	NO	NO	NO	NO
1	107777564	107777969	esv3587107	405	NONE	0	0.006	0	0	1.440472149	2.877545974	5.73735877	4.167952174	NO	NO	NO	NO
1	107896853	107899383	esv3587108	2530	NONE	0	0	0.0129	0	-0.498717019	0.539303248	0.450324211	-0.504218781	NO	NO	NO	NO
1	108201047	108202427	esv3587112	1380	NONE	0.0045	0	0	0	2.513451215	5.943130603	4.528706889	6.334814185	NO	NO	NO	NO
1	108222809	108225243	esv3587113	2434	NONE	0	0	0	0	0.158399374	0.145098079	-0.983929489	-1.138695988	NO	NO	NO	NO
1	108369370	108369999	esv3587115	629	NONE	0	0	0.002	0	2.91660126	-0.176256901	0.005772289	-1.57712017	NO	NO	NO	NO
1	108402972	108405499	esv3587116	2527	NONE	0.0015	0.0437	0.0238	0.0276	-0.329091938	0.882340822	-0.448883478	-0.101150323	NO	NO	NO	NO
1	108431162	108432234	esv3587117	1072	NONE	0.0008	0	0	0	0.643060975	0.559826009	-0.122602063	0.519496959	NO	NO	NO	NO
1	108451704	108458133	esv3587118	6429	NONE	0	0	0	0.0031	0.100153813	0.651843065	-1.572596026	-0.032088277	NO	NO	NO	NO
1	108598997	108609964	esv3587119	10967	NONE	0	0	0.003	0	-0.142374698	1.763025524	-0.409434758	0.083743406	NO	NO	NO	NO
1	108607718	108609953	esv3587120	2235	NONE	0	0	0.003	0.001	0.035803273	2.800330005	-0.266343151	1.247085551	NO	NO	NO	NO
1	108644528	108660826	esv3587121	16298	NONE	0.0015	0	0	0	-0.368148826	0.799829722	-0.814375258	-0.389636633	NO	NO	NO	NO
1	108656210	108657767	esv3587122	1557	NONE	0.0015	0	0	0	0.050107164	1.12879497	-1.404217275	-0.922841776	NO	NO	NO	NO
1	108891619	108895544	esv3587129	3925	NONE	0	0	0.001	0	1.379595279	2.608470005	1.440475392	3.787845309	NO	NO	NO	NO
1	108903817	108908420	esv3587130	4603	NONE	0	0	0.001	0	3.049138734	3.473618932	4.550048729	6.663281071	NO	NO	NO	NO
1	109216681	109223305	esv3587135	6624	NONE	0	0	0.004	0	-0.07033526	1.450056748	0.298647321	0.363308107	NO	NO	NO	NO
1	109348674	109349553	esv3587137	879	NONE	0	0.007	0	0	1.867232758	1.842329702	0.671576376	2.767686484	NO	NO	NO	NO
1	109366972	109372000	esv3587138	5028	AKNAD1:1	0.0008	0.0249	0.0873	0.0481	-0.765038069	0.899742219	-1.825602991	-0.247994981	NO	NO	NO	NO
1	109409105	109458015	esv3587141	48910	GPSM2:12	0	0.001	0	0	-0.407778672	0.227576021	-1.199640886	-0.562182757	NO	NO	NO	NO
1	109494584	109499878	esv3587142	5294	NONE	0.0643	0	0	0	-0.699011854	0.505741195	-0.284643855	0.587148314	NO	NO	NO	NO
1	109496490	109501636	esv3587143	5146	NONE	0.0726	0	0	0	-0.871831669	0.418828594	-0.148130429	0.689240478	NO	NO	NO	NO
1	109573240	109575184	esv3587144	1944	NONE	0.1558	0.2614	0.2163	0.2025	0.388992202	0.622269317	-1.295793334	-0.597351974	NO	NO	NO	NO
1	109580101	109581408	esv3587145	1307	NONE	0	0.001	0	0	0.64432273	1.78720675	0.232779069	0.112353776	NO	NO	NO	NO
1	109602616	109603316	esv3587146	700	NONE	0.1006	0.0348	0.0159	0.0266	2.336544171	4.143489261	3.197603996	3.647843842	NO	NO	NO	NO
1	109609283	109619415	esv3587147	10132	TAF13:2	0	0.001	0	0	-0.288078714	1.024878854	-0.07649079	-0.087727804	NO	NO	NO	NO
1	109625803	109629739	esv3587148	3936	NONE	0	0	0	0	-0.540843229	0.799646148	-0.50316674	-0.552736316	NO	NO	NO	NO
1	109700981	109701566	esv3587149	585	NONE	0	0	0.001	0	-1.000885033	-0.038976793	-1.358117044	2.029463275	NO	NO	NO	NO
1	109842745	109846395	esv3587150	3650	NONE	0	0	0.001	0	-1.240167168	-1.391907207	-2.131631265	-1.627662365	NO	NO	NO	NO
1	110187159	110191392	esv3587152	4233	NONE	0.5424	0.5895	0.6716	0.5542	-13.06429966	-11.006354	-12.42339964	-16.94039399	YES	YES	YES	YES
1	110203516	110217098	esv3587153	13582	GSTM2:8|GSTM4:3	0	0.001	0.001	0	-1.392611128	-0.806449425	-1.882594235	-0.528759336	NO	NO	NO	NO
1	110225019	110245280	esv3587154	20261	GSTM1:8|GSTM2:1	0.4962	0.7227	0.753	0.5685	-0.637720374	0.020286939	-0.187086965	0.280998919	NO	NO	NO	NO
1	110387164	110402236	esv3587159	15072	NONE	0	0	0	0	-0.810326658	0.19840305	-0.294335329	0.846644777	NO	NO	NO	NO
1	110462285	110463015	esv3587160	730	NONE	0.0008	0.007	0	0	-0.473291427	-0.248768048	-1.143488737	-0.211555913	NO	NO	NO	NO
1	110484123	110485802	esv3587161	1679	NONE	0	0	0	0	0.804469211	0.689761563	0.602610745	0.47334896	NO	NO	NO	NO
1	110876132	110878893	esv3587164	2761	NONE	0	0	0	0.002	-0.487407487	1.563699256	-0.223933608	-1.278916794	NO	NO	NO	NO
1	111013750	111014940	esv3587165	1190	NONE	0	0	0.005	0.001	-0.020280188	-2.109057213	-0.767535967	-0.486917633	NO	NO	NO	NO
1	111026431	111028454	esv3587166	2023	CYMP:2	0.003	0	0	0	-1.156318502	-2.561343691	-2.633811314	-1.849590508	NO	NO	NO	NO
1	111048856	111049770	esv3587167	914	NONE	0	0	0	0.001	-0.55167473	-1.046104723	-0.042632141	0.951417877	NO	NO	NO	NO
1	111221078	111228967	esv3587169	7889	NONE	0	0	0.002	0	-0.673575559	-0.623632645	-0.016773141	-0.131328792	NO	NO	NO	NO
1	111251860	111256355	esv3587170	4495	NONE	0	0	0	0.001	-0.978965411	-0.718215268	-0.321742509	-0.40137384	NO	NO	NO	NO
1	111359565	111360435	esv3587172	870	NONE	0.0106	0	0	0	-0.376736065	0.341176864	0.140794366	1.063482463	NO	NO	NO	NO
1	111376650	111388643	esv3587173	11993	NONE	0.1362	0.0845	0.005	0.0828	-0.315083572	-0.392726048	0.027765661	1.757948915	NO	NO	NO	NO
1	111383249	111384514	esv3587174	1265	NONE	0.1815	0.0835	0.005	0.0828	-14.10988399	-12.90538573	-13.98858913	1.364571392	YES	YES	YES	NO
1	111472607	111477755	esv3587175	5148	NONE	0	0	0.0109	0	0.063671342	1.396884964	1.729691881	3.078644257	NO	NO	NO	NO
1	111520109	111522105	esv3587176	1996	NONE	0	0	0	0	0.038688722	0.50954151	1.153141914	-1.370250463	NO	NO	NO	NO
1	111527716	111536638	esv3587177	8922	NONE	0.0008	0	0	0	-0.609855458	-0.647792382	0.117800318	0.264963124	NO	NO	NO	NO
1	111827762	111836104	esv3587180	8342	CHIA:1|CHIAP2:1	0	0	0.0119	0.0031	-0.590743436	-1.010225965	-0.72339031	0.259076779	NO	NO	NO	NO
1	111841161	111880963	esv3587181	39802	CHIA:12	0	0.001	0	0	-0.189409804	0.17465446	0.280016869	0.787405108	NO	NO	NO	NO
1	111928797	111934864	esv3587183	6067	PGBP:4	0	0.0139	0	0	-0.684493602	-1.315077134	-1.473759646	0.54036326	NO	NO	NO	NO
1	111950979	111952277	esv3587184	1298	NONE	0	0.001	0	0	1.813195145	-0.116798255	0.919163282	-0.338330771	NO	NO	NO	NO
1	112085468	112088516	esv3587189	3048	NONE	0	0	0.002	0	-0.861863917	-1.030519305	-0.616956459	0.872371018	NO	NO	NO	NO
1	112198600	112199825	esv3587195	1225	NONE	0	0.001	0	0	0.949773774	0.292189133	-0.719074028	-1.160331554	NO	NO	NO	NO
1	112341915	112359549	esv3587199	17634	NONE	0	0	0.001	0	-1.654046398	-1.530358783	-1.828343761	-1.324514863	NO	NO	NO	NO
1	112691740	112704718	esv3587201	12978	NONE	0.025	0.3181	0.377	0.5184	2.090981015	1.296871258	2.453824173	7.7535766	NO	NO	NO	NO
1	112825667	112826276	esv3587206	609	NONE	0	0.001	0	0.0031	0.433649651	0.977619898	0.309228597	0.392390659	NO	NO	NO	NO
1	112834896	112837824	esv3587207	2928	NONE	0.7625	0.9344	0.9256	0.9213	0.482167208	-0.225937608	-0.365488115	-1.112631401	NO	NO	NO	NO
1	112875190	112875680	esv3587208	490	NONE	0	0.001	0	0	0.446176936	1.191258074	-1.36735177	2.437622824	NO	NO	NO	NO
1	112983538	112987621	esv3587211	4083	NONE	0.0008	0	0.002	0	0.527075028	0.979740838	0.357174726	0.581407454	NO	NO	NO	NO
1	113036692	113037956	esv3587213	1264	NONE	0.0681	0	0	0	0.736128072	0.784660821	2.058779855	0.525174476	NO	NO	NO	NO
1	113206118	113207422	esv3587216	1304	NONE	0	0	0	0.0266	0.636737684	2.37363291	1.686985942	2.308318203	NO	NO	NO	NO
1	113219964	113224478	esv3587217	4514	NONE	0.0129	0	0	0	-0.305526741	-0.249397942	-0.636710872	1.249234159	NO	NO	NO	NO
1	113337953	113341470	esv3587218	3517	NONE	0	0	0.001	0	-0.671650792	-1.751127471	-1.035563332	0.049898764	NO	NO	NO	NO
1	113342098	113433367	esv3587220	91269	LINC01356:7|MIR11399:1	0.0008	0	0	0	-0.746776073	0.01102346	-0.866683664	-0.300295746	NO	NO	NO	NO
1	113378387	113379341	esv3587221	954	NONE	0	0.003	0	0.001	-0.112350863	1.158182747	-0.87893497	-1.0811313	NO	NO	NO	NO
1	113402157	113406605	esv3587222	4448	NONE	0	0	0	0.0174	0.26075172	1.169393179	0.330739728	0.863150105	NO	NO	NO	NO
1	113427626	113429899	esv3587223	2273	NONE	0.0008	0.001	0	0	-0.328293633	-0.027508391	-0.717612337	0.495176431	NO	NO	NO	NO
1	113529206	113532706	esv3587227	3500	NONE	0.121	0	0	0	-0.457290824	1.686610481	0.47483748	1.678781537	NO	NO	NO	NO
1	113532164	113536693	esv3587228	4529	NONE	0	0	0	0.002	-0.624876848	1.382327594	-0.009467074	1.224823533	NO	NO	NO	NO
1	113568590	113578129	esv3587229	9539	NONE	0.0023	0	0	0	-0.886909207	-0.228048768	-0.655533544	-0.201307957	NO	NO	NO	NO
1	113577228	113578910	esv3587230	1682	NONE	0	0	0.001	0	1.03997916	1.307414196	0.320470036	2.20057243	NO	NO	NO	NO
1	113630146	113751915	esv3587231	121769	LRIG2:18|LOC643441:3	0.0008	0	0	0	-0.391899726	0.133259796	-0.268867694	-0.037555457	NO	NO	NO	NO
1	113640130	113641476	esv3587232	1346	LRIG2:1	0	0	0	0.001	0.343092089	-0.122496011	0.994655728	2.581118168	NO	NO	NO	NO
1	113716372	113722170	esv3587233	5798	NONE	0.0015	0	0	0	-0.200363176	0.454175773	0.577569973	-0.991118594	NO	NO	NO	NO
1	113794249	113795508	esv3587234	1259	NONE	0	0	0	0.001	-1.690018606	-1.431392549	0.704107589	-0.986656018	NO	NO	NO	NO
1	113799625	113800089	esv3587235	464	NONE	0.4818	0.837	0.9653	0.8047	1.361586654	-0.976486275	4.200874344	2.111240991	NO	NO	NO	NO
1	113810961	113933784	esv3587236	122823	MAGI3:1	0.0008	0	0	0	0.17289634	-0.033869822	0.101110954	0.948508964	NO	NO	NO	NO
1	113955952	113958022	esv3587238	2070	NONE	0	0.003	0	0	4.386098697	2.58195836	1.81923085	5.802508132	NO	NO	NO	NO
1	114053474	114409284	esv3587239	355810	PHTF1:31|MAGI3:21|PTPN22:21|RSBN1:8|AP4B1-AS1:6	0.0008	0	0	0	0.33134637	0.650276174	0.195817448	0.070844767	NO	NO	NO	NO
1	114075868	114701532	esv3587240	625664	PHTF1:31|PTPN22:23|HIPK1:22|MAGI3:21|AP4B1:13|SYT6:13|AP4B1-AS1:8|DCLRE1B:8|RSBN1:8|OLFML3:7|HIPK1-AS1:6|BCL2L15:4	0.0008	0	0	0	-0.393029511	0.021144392	-0.497337616	-0.355325606	NO	NO	NO	NO
1	114099331	114102347	esv3587242	3016	NONE	0.0008	0.001	0	0	-0.460996175	1.772839283	1.106992466	-1.528900639	NO	NO	NO	NO
1	114241657	114265871	esv3587245	24214	PHTF1:13	0.0008	0	0	0.001	0.057339626	0.570756497	0.13432612	-0.717283931	NO	NO	NO	NO
1	114247966	114248890	esv3587246	924	PHTF1:2	0.0008	0	0	0	2.466486277	0.863799981	1.308226347	1.6843321	NO	NO	NO	NO
1	114324443	114327008	esv3587249	2565	NONE	0	0	0	0.001	0.164935735	0.71688428	-0.910577126	-0.044538508	NO	NO	NO	NO
1	114394883	114396074	esv3587250	1191	NONE	0.0008	0	0	0	0.97260688	1.882994738	0.276929516	2.053961862	NO	NO	NO	NO
1	114414325	114478909	esv3587251	64584	AP4B1:13|DCLRE1B:8|HIPK1-AS1:6|BCL2L15:4|AP4B1-AS1:2|HIPK1:2|PTPN22:2	0.0008	0	0	0	-0.80619539	0.319466916	-1.201749884	-0.556750023	NO	NO	NO	NO
1	114482901	114515484	esv3587252	32583	HIPK1:19	0.0008	0	0	0	-0.072020803	0.575253352	-0.366262252	0.134463422	NO	NO	NO	NO
1	114486929	114491699	esv3587253	4770	NONE	0.0008	0	0	0	0.49376486	1.033855765	-0.247673953	0.598874079	NO	NO	NO	NO
1	114544914	114707957	esv3587254	163043	SYT6:13	0.0008	0	0	0	-1.578849545	-1.426894496	-1.396729462	-0.958800947	NO	NO	NO	NO
1	114669018	114671030	esv3587256	2012	NONE	0.0015	0	0.001	0	-2.474710127	-2.661777907	-2.406129319	-2.410397982	NO	NO	NO	NO
1	114739237	114742896	esv3587257	3659	NONE	0.0008	0	0	0.001	-1.267685003	-0.974926882	-0.443096813	-1.354000171	NO	NO	NO	NO
1	114813945	114817796	esv3587258	3851	NONE	0.0015	0	0.001	0	0.785233373	-0.236125887	0.383385315	1.134329442	NO	NO	NO	NO
1	114877078	114885151	esv3587260	8073	NONE	0.0008	0	0	0.001	-1.494509389	-0.419392806	-1.528624877	-0.964355007	NO	NO	NO	NO
1	114925678	114926984	esv3587261	1306	NONE	0	0	0.004	0	2.009536003	3.566287054	2.650774771	1.385234943	NO	NO	NO	NO
1	114939198	114968568	esv3587262	29370	TRIM33:12	0.0008	0	0	0	0.210615362	0.490453603	-0.024820511	-0.357175969	NO	NO	NO	NO
1	114973622	115104225	esv3587263	130603	TRIM33:5	0.0008	0	0	0	-0.191157813	0.546771564	-0.296406815	-0.474411809	NO	NO	NO	NO
1	115014213	115015930	esv3587264	1717	NONE	0.0008	0	0	0	2.182362264	2.901607741	0.371410058	-0.574928165	NO	NO	NO	NO
1	115130092	115157074	esv3587266	26982	DENND2C:12	0.0008	0	0	0	-0.028107672	0.589540539	-0.007838359	0.236115079	NO	NO	NO	NO
1	115171093	115221095	esv3587269	50002	AMPD1:9|DENND2C:3	0.0008	0	0	0	0.036337661	0.724123996	-0.06668853	-0.055342567	NO	NO	NO	NO
1	115178042	115181388	esv3587270	3346	NONE	0	0	0.001	0	-0.065345113	0.384642473	-0.1848891	0.113801396	NO	NO	NO	NO
1	115193622	115195665	esv3587271	2043	NONE	0.0015	0	0	0.001	-0.808961317	0.787998962	-0.625293761	1.664974409	NO	NO	NO	NO
1	115194476	115197094	esv3587272	2618	NONE	0.0068	0	0	0	-0.061077601	0.122203711	-0.042051351	0.082423227	NO	NO	NO	NO
1	115227074	115245524	esv3587274	18450	AMPD1:4	0.0008	0	0	0	-0.41944824	0.896792848	-0.095941205	0.413540803	NO	NO	NO	NO
1	115316965	115321770	esv3587275	4805	SIKE1:3	0.0008	0	0	0	0.714333825	0.745969587	1.014220077	2.203794931	NO	NO	NO	NO
1	115564452	115565839	esv3587276	1387	NONE	0	0	0.001	0	-0.360437483	0.074963586	0.116142492	0.802424839	NO	NO	NO	NO
1	115587799	115596824	esv3587278	9025	TSPAN2:2	0.0008	0	0.001	0	0.03177714	-0.25921619	-0.056579669	-0.075780713	NO	NO	NO	NO
1	115680818	115681924	esv3587280	1106	NONE	0.0008	0.0229	0	0.001	-1.786375454	-3.019023998	-2.529875146	-2.123995399	NO	NO	NO	NO
1	115720303	115728276	esv3587281	7973	NONE	0.0008	0	0	0.0031	-0.895188379	-0.948713628	-1.456876516	-0.174332962	NO	NO	NO	NO
1	115911866	115921656	esv3587284	9790	NONE	0.0008	0	0	0.001	-0.458397934	-0.7217889	-0.252400138	-0.016112568	NO	NO	NO	NO
1	115950365	116107709	esv3587285	157344	NONE	0.0008	0	0	0	-0.92816229	-0.84772073	-0.723615785	-0.550357484	NO	NO	NO	NO
1	116141715	116143121	esv3587289	1406	NONE	0	0	0.001	0	1.43966366	1.674843342	0.840546508	0.300392327	NO	NO	NO	NO
1	116229468	116232839	esv3587290	3371	NONE	0.2723	0.2634	0.1964	0.3272	1.00230141	0.152896329	0.044926387	-0.007717006	NO	NO	NO	NO
1	116255705	116380330	esv3587292	124625	CASQ2:8|NHLH2:1	0.0008	0	0	0	-0.641025001	-0.630964117	-0.656310729	-0.524201934	NO	NO	NO	NO
1	116321247	116377376	esv3587293	56129	NONE	0.0008	0	0	0	-0.532155799	-0.364973723	-0.645959574	-0.437886995	NO	NO	NO	NO
1	116404020	116499388	esv3587294	95368	LINC01649:3|LOC101928977:3	0.0008	0	0	0	-0.417063676	-0.124258187	-0.565668757	-0.432140966	NO	NO	NO	NO
1	116486546	116493142	esv3587295	6596	NONE	0.0106	0	0	0	-0.187871552	0.182337646	0.029092477	0.30174032	NO	NO	NO	NO
1	116831299	116836099	esv3587301	4800	NONE	0.0113	0	0	0	-1.003934543	-0.554560191	-0.22456529	0.398270937	NO	NO	NO	NO
1	117297804	117301362	esv3587305	3558	NONE	0	0	0	0.0164	-1.12053639	-0.869618487	-1.652233518	-0.670620711	NO	NO	NO	NO
1	117593370	117594971	esv3587307	1601	NONE	0	0	0.0109	0.001	0.214559104	0.182867136	0.3109594	1.495384133	NO	NO	NO	NO
1	117777388	117779715	esv3587310	2327	NONE	0	0	0.001	0	-0.031372625	0.02473611	0.377314908	1.839673927	NO	NO	NO	NO
1	117824809	117828072	esv3587311	3263	NONE	0	0	0	0.001	-0.52280833	-0.882801075	-0.487592384	-0.480746908	NO	NO	NO	NO
1	117880406	117881842	esv3587313	1436	NONE	0.0877	0.1431	0	0.0542	0.414719145	0.363792452	1.332864974	2.789081649	NO	NO	NO	NO
1	118017129	118021459	esv3587315	4330	NONE	0	0	0	0.002	2.129548876	3.318440974	2.568352881	3.573550579	NO	NO	NO	NO
1	118058745	118061316	esv3587318	2571	NONE	0.0023	0	0	0	1.556135274	1.854504	1.748277109	0.206219379	NO	NO	NO	NO
1	118068837	118075968	esv3587319	7131	MAN1A2:1	0.0008	0	0	0	0.666803655	-0.197307513	0.093928473	0.042747772	NO	NO	NO	NO
1	118173014	118173782	esv3587320	768	NONE	0	0.001	0	0	-2.700618215	-1.131494279	-1.617068131	0.348185776	NO	NO	NO	NO
1	118327349	118335085	esv3587322	7736	NONE	0.0008	0	0	0	0.458700982	0.014095331	0.879626286	0.209851634	NO	NO	NO	NO
1	118368979	118369650	esv3587323	671	NONE	0	0	0.001	0	-0.696793088	-1.015057932	-1.524348987	-2.398971586	NO	NO	NO	NO
1	118868624	118870210	esv3587328	1586	NONE	0.0091	0.001	0	0	0.852752878	0.134629678	0.990625672	0.632664856	NO	NO	NO	NO
1	118983667	118986271	esv3587329	2604	NONE	0	0	0.003	0	0.037625818	-0.278606238	0.27548917	-0.643323447	NO	NO	NO	NO
1	118990443	118997152	esv3587330	6709	NONE	0	0.001	0	0	0.043621452	0.202165754	0.677237863	0.583749273	NO	NO	NO	NO
1	119099205	119105056	esv3587332	5851	NONE	0	0	0	0	-0.405192393	-0.783282328	-0.042625953	-0.124510223	NO	NO	NO	NO
1	119199703	119222086	esv3587333	22383	NONE	0.0038	0	0	0	0.155097647	0.112278171	0.499581978	0.056536999	NO	NO	NO	NO
1	119482202	119483660	esv3587336	1458	NONE	0.0303	0.001	0	0	0.556344866	1.003596288	-0.376649545	0.337021389	NO	NO	NO	NO
1	119526940	119531049	esv3587338	4109	TBX15:1	0.0083	0.007	0.0069	0.002	-2.561587799	-2.08849971	-4.019041497	-4.148132603	NO	NO	NO	NO
1	119822648	119824187	esv3587341	1539	NONE	0	0	0	0	-0.868894903	-1.251106945	-1.448088114	0.56989153	NO	NO	NO	NO
1	119998931	120015689	esv3587342	16758	NONE	0	0.001	0	0	-0.702597033	-0.819564414	-0.534100043	-0.1580306	NO	NO	NO	NO
1	120012853	120013656	esv3587343	803	NONE	0.1868	0.001	0.0645	0.0245	-0.737019627	-0.781564795	-1.34128207	0.881211222	NO	NO	NO	NO
1	120084032	120087168	esv3587344	3136	NONE	0	0.001	0	0	-0.768186708	-0.969965342	-1.451762934	-0.605817278	NO	NO	NO	NO
1	120127345	120158462	esv3587348	31117	LINC00622:1	0.0008	0	0.002	0.0041	-0.916222927	-3.129785772	-0.590846099	4.818385999	NO	NO	NO	NO
1	120151904	120154464	esv3587351	2560	NONE	0.0234	0	0.002	0.002	-0.921450204	-0.331729052	-0.302979745	0.149932016	NO	NO	NO	NO
1	120200169	120213646	esv3587352	13477	NONE	0.0008	0	0	0	-0.61295538	0.356211508	-0.625320201	-0.134365933	NO	NO	NO	NO
1	120747699	120760526	esv3587354	12827	NONE	0	0.008	0	0.001	9.68102603	8.638860588	9.906405123	9.6485	NO	NO	NO	NO
1	121141175	121170321	esv3587355	29146	NONE	0.0008	0.001	0	0	3.861679642	2.041525158	2.317221907	5.002778251	NO	NO	NO	NO
1	121167229	121170441	esv3587356	3212	NONE	0.0015	0.001	0	0	0.96001401	0.062469655	0.183374875	0.195113135	NO	NO	NO	NO
1	142678798	142719505	esv3587362	40707	ANKRD20A12P:5	0.0091	0	0.0714	0.0041	25.8216426	11.02815615	16.77626055	20.14603196	NO	NO	NO	NO
1	143123694	143127497	esv3587374	3803	NONE	0.0219	0	0.001	0	15.24312015	0.761286569	0.610928076	13.47918774	NO	NO	NO	NO
1	143711586	143770484	esv3587384	58898	LINC01138:6|LOC100132057:3|PPIAL4G:1|PPIAL4H:1	0.0015	0	0	0	5.441436852	4.331325108	4.791713749	6.875471786	NO	NO	NO	NO
1	144468090	144480623	esv3587388	12533	LOC105369199:1	0.1944	0.3956	0.3839	0.5736	-5.343404613	-5.052372041	-5.318976945	-9.547276657	YES	YES	YES	YES
1	144949058	144949392	esv3587402	334	NONE	0.0212	0.0099	0.0298	0.0164	17.83532309	14.13142151	14.63134387	27.668841	NO	NO	NO	NO
1	144954627	144955376	esv3587404	749	PDE4DIP:1	0.1989	0.1531	0.1478	0.2311	8.514333558	10.0300559	8.818787982	10.90825288	NO	NO	NO	NO
1	145387916	145389462	esv3587415	1546	NONE	0	0	0.001	0	-0.263454028	1.147642181	0.120818149	0.634625811	NO	NO	NO	NO
1	145444467	145447385	esv3587416	2918	NONE	0	0	0	0	-0.179706462	2.663378589	0.509711846	-0.047306194	NO	NO	NO	NO
1	145488747	145496397	esv3587418	7650	LIX1L:1|LIX1L-AS1:1	0	0.001	0	0	-0.365198088	1.980203501	-0.360950008	0.357842719	NO	NO	NO	NO
1	145684358	145686992	esv3587423	2634	RNF115:2	0	0	0.003	0	-0.798818273	0.757700575	0.198581082	0.252636068	NO	NO	NO	NO
1	145719681	145722871	esv3587424	3190	NONE	0	0	0.0089	0	-1.046376365	1.693420706	-0.744349747	-0.10883477	NO	NO	NO	NO
1	145829821	145993142	esv3587425	163321	PDZK1P1:10|PDE4DIPP1:1|RNVU1-7:1	0	0	0.002	0	-5.668627724	-4.877486814	-5.312936564	-5.726242126	YES	NO	YES	YES
1	146591662	146601721	esv3587431	10059	NONE	0	0	0	0.0051	1.727961366	1.66200472	1.549033398	5.235273058	NO	NO	NO	NO
1	146594322	146598888	esv3587432	4566	NONE	0	0	0.001	0.0051	2.699096296	3.176308176	3.303325374	9.516479506	NO	NO	NO	NO
1	146617605	146620584	esv3587433	2979	NONE	0.0098	0	0	0	0.232304776	0.677468741	0.26408737	-0.189611829	NO	NO	NO	NO
1	146660636	146670292	esv3587435	9656	FMO5:1	0.0061	0	0	0	2.10664411	2.877979249	2.977270576	6.138028932	NO	NO	NO	NO
1	146838101	146851792	esv3587436	13691	NONE	0	0.001	0	0	1.288846584	0.754277674	1.226526673	2.469409321	NO	NO	NO	NO
1	146880576	146895821	esv3587438	15245	NONE	0	0	0	0.001	0.16525597	0.196457356	0.661351104	0.831529202	NO	NO	NO	NO
1	146914878	146932509	esv3587439	17631	NONE	0	0	0.001	0	0.75877926	1.236980741	1.493751502	2.260184146	NO	NO	NO	NO
1	146916415	146920482	esv3587440	4067	NONE	0	0	0.004	0	0.187631895	-0.141930346	0.032042954	0.965732397	NO	NO	NO	NO
1	147032452	147033870	esv3587441	1418	NONE	0	0.001	0	0	1.707580842	0.549292416	1.41333533	0.076508514	NO	NO	NO	NO
1	147042540	147044547	esv3587442	2007	NONE	0	0	0	0	0.142657123	1.089388749	1.151440362	1.285566861	NO	NO	NO	NO
1	147055495	147060387	esv3587443	4892	NONE	0	0	0.001	0	-1.046449527	-0.123235824	-0.906713903	-0.024654492	NO	NO	NO	NO
1	147330172	147337016	esv3587449	6844	NONE	0.0008	0	0	0	1.600385727	2.6481576	2.40959149	3.039177626	NO	NO	NO	NO
1	147718462	147802306	esv3587450	83844	LOC101927468:1	0.0008	0	0.001	0	0.05176649	0.590454256	0.300865092	-0.500694491	NO	NO	NO	NO
1	147745982	147746749	esv3587451	767	NONE	0.0106	0	0	0	0.72404746	3.247097194	1.850617519	-17.33534762	NO	NO	NO	YES
1	147803021	147803536	esv3587452	515	NONE	0.0023	0	0	0	0.973417503	3.377660793	3.471128949	0.59577504	NO	NO	NO	NO
1	147807339	147810495	esv3587453	3156	NONE	0.0045	0	0	0	0.14273562	0.812290698	-0.599413446	1.445584015	NO	NO	NO	NO
1	149090849	149092378	esv3587468	1529	NONE	0.0144	0.0686	0.0913	0.0961	1.255501784	-1.464686202	2.963509589	-16.122893	NO	NO	NO	YES
1	149227780	149230747	esv3587476	2967	NONE	0.0401	0.1173	0.1329	0.1483	2.532381475	-2.650576958	1.672019145	-12.54933385	NO	NO	NO	YES
1	149328931	149332759	esv3587489	3828	NONE	0.0333	0.0726	0.0784	0.0992	-8.681815189	-7.335186094	-8.804001806	-10.81041637	YES	YES	YES	YES
1	149532289	149572952	esv3587491	40663	PPIAL4A:1|PPIAL4C:1	0.8949	0.992	0.8125	0.9509	-0.232373167	0.169169424	-0.38295688	-4.935089587	NO	NO	NO	NO
1	149765121	149767735	esv3587495	2614	NONE	0.0348	0	0	0	-2.49765825	-1.696877212	-2.71663872	-1.359161265	NO	NO	NO	NO
1	149961609	149963580	esv3587497	1971	NONE	0	0	0.001	0	0.334880498	-0.027404384	0.004811449	1.583479971	NO	NO	NO	NO
1	150159097	150160635	esv3587500	1538	NONE	0.0008	0	0	0	-0.632554214	-0.596177677	-1.977658757	-1.709658671	NO	NO	NO	NO
1	150210123	150211168	esv3587502	1045	NONE	0.0008	0	0	0	1.05126276	3.506352325	1.190993107	1.036157776	NO	NO	NO	NO
1	150212815	150214155	esv3587503	1340	NONE	0	0	0	0.001	0.917913337	2.590892164	0.494733317	2.889197831	NO	NO	NO	NO
1	150274234	150290267	esv3587504	16033	MRPS21:1	0	0	0	0.001	-1.034339007	1.622262612	-0.038000972	0.100787534	NO	NO	NO	NO
1	150417770	150418359	esv3587505	589	NONE	0	0	0.002	0	2.346772305	2.461573094	3.329864395	1.815380521	NO	NO	NO	NO
1	150543465	150544697	esv3587506	1232	NONE	0.0023	0	0	0	-0.333646526	3.190389734	0.251807836	0.101554305	NO	NO	NO	NO
1	150585143	150594001	esv3587508	8858	ENSA:1	0	0	0	0.001	-0.557502086	1.488725176	0.041927782	0.222143588	NO	NO	NO	NO
1	150589206	150590209	esv3587509	1003	NONE	0	0.001	0	0.002	-1.199518569	1.603248022	1.967352093	1.136124055	NO	NO	NO	NO
1	150725676	150727398	esv3587511	1722	NONE	0	0.001	0	0	-0.453954289	1.133274032	0.521262248	-1.258058696	NO	NO	NO	NO
1	150743678	150745433	esv3587512	1755	NONE	0	0.001	0	0	0.468126452	0.890287702	-0.11373776	3.74177645	NO	NO	NO	NO
1	150850415	150852221	esv3587513	1806	NONE	0.0015	0	0	0	0.984267506	2.008837165	-0.639714446	0.201896064	NO	NO	NO	NO
1	150851322	150851830	esv3587514	508	NONE	0.0015	0	0	0.0051	1.295023763	4.563277129	-1.821975678	0.872371018	NO	NO	NO	NO
1	150860254	150862805	esv3587515	2551	NONE	0.0008	0.0209	0.001	0.0082	-13.16000094	-11.13000286	-12.1873343	-0.393389388	YES	YES	YES	NO
1	150888264	150890266	esv3587516	2002	NONE	0	0.001	0	0	0.878236847	2.394288731	0.693933445	0.897112796	NO	NO	NO	NO
1	150888683	150895278	esv3587517	6595	NONE	0	0	0.001	0.001	-0.076806326	1.55245602	0.482807839	0.189304307	NO	NO	NO	NO
1	150907554	150912075	esv3587518	4521	NONE	0	0	0	0	0.560501915	2.490095505	0.513331211	1.332357516	NO	NO	NO	NO
1	151047027	151051344	esv3587519	4317	NONE	0.0008	0	0	0	0.213051048	3.078336033	1.04754664	0.635766483	NO	NO	NO	NO
1	151140413	151141262	esv3587520	849	SCNM1:1|SCNM1/gTNFAIP8L2-SCNM1:1|TNFAIP8L2-SCNM1:1	0	0	0.001	0	-0.04973532	1.346540322	-1.804022952	-1.3545032	NO	NO	NO	NO
1	151423647	151426019	esv3587528	2372	NONE	0.0015	0	0.0129	0	0.897983064	1.303146032	0.240303693	1.418372487	NO	NO	NO	NO
1	151425170	151430231	esv3587529	5061	NONE	0	0	0	0.001	-0.104867642	0.783525192	-0.056001566	0.457910972	NO	NO	NO	NO
1	151478182	151479109	esv3587530	927	NONE	0	0	0	0.001	0.703249788	2.258114423	1.54360411	1.918412285	NO	NO	NO	NO
1	151526922	151528926	esv3587531	2004	NONE	0	0.001	0	0	0.21967313	0.286218807	-0.014414346	-0.662764691	NO	NO	NO	NO
1	151590325	151591036	esv3587532	711	NONE	0	0	0.001	0	0.962755635	1.762112867	-0.096554157	0.359632807	NO	NO	NO	NO
1	151937096	151942923	esv3587538	5827	NONE	0.0008	0	0	0	-0.87817869	-0.394628159	-1.318793983	-0.402368187	NO	NO	NO	NO
1	152011665	152015840	esv3587540	4175	NONE	0.0008	0	0	0	-1.029687209	1.055631599	-0.026963135	-0.321265873	NO	NO	NO	NO
1	152053099	152054174	esv3587541	1075	LOC100131107:1	0.0098	0	0	0	-0.426945662	-0.187501943	-0.531249372	1.470054543	NO	NO	NO	NO
1	152142929	152143365	esv3587543	436	NONE	0.0008	0	0	0	1.238154162	0.626167548	-0.992535224	0.832572075	NO	NO	NO	NO
1	152260684	152271403	esv3587545	10719	NONE	0	0	0.002	0	3.231760472	4.024902434	4.691289276	6.113481158	NO	NO	NO	NO
1	152315042	152317851	esv3587547	2809	NONE	0	0	0	0.002	1.469770696	0.431406082	0.456097661	1.220159087	NO	NO	NO	NO
1	152351820	152356727	esv3587548	4907	NONE	0	0	0	0.001	-0.839808687	-0.516755867	-0.718072172	-0.56588286	NO	NO	NO	NO
1	152414904	152419061	esv3587551	4157	NONE	0	0	0.006	0	-1.108800508	-1.919822253	-2.4888811	-0.855197452	NO	NO	NO	NO
1	152445404	152447729	esv3587555	2325	NONE	0	0	0.001	0.001	-0.803076205	-0.902293486	-0.649076297	-2.243586636	NO	NO	NO	NO
1	152495206	152497869	esv3587559	2663	NONE	0.0061	0	0	0	0.628920992	0.304856191	1.545293016	0.534304589	NO	NO	NO	NO
1	152555495	152586932	esv3587563	31437	LCE3C:2|LCE3B:1	0.3714	0.6412	0.6379	0.6217	-0.393469121	-0.71529613	0.383197818	-19.18021931	NO	NO	NO	YES
1	152643788	152646692	esv3587565	2904	NONE	0	0	0.003	0	-0.503955477	-1.366933858	-0.399297563	1.439918094	NO	NO	NO	NO
1	152760084	152770547	esv3587569	10463	LCE1D:2|LCE1E:1	0.2035	0.3569	0.0347	0.1636	0.086841543	-0.854292484	0.01756251	0.007339737	NO	NO	NO	NO
1	152934097	152943630	esv3587572	9533	SPRR4:1	0	0	0	0.001	-1.519689495	-1.815184385	-1.868807036	-0.949936503	NO	NO	NO	NO
1	153098583	153100378	esv3587576	1795	NONE	0.0008	0	0	0	-0.347020013	-0.093435733	1.231477525	0.880544062	NO	NO	NO	NO
1	153133703	153133960	esv3587577	257	NONE	0.2655	0.5507	0.5149	0.499	4.442868143	3.574490433	5.243651791	4.376598238	NO	NO	NO	NO
1	153226281	153227456	esv3587580	1175	NONE	0	0	0.002	0	-1.857510727	-0.040363372	0.136100866	1.494638649	NO	NO	NO	NO
1	153371854	153372284	esv3587583	430	NONE	0	0	0	0	-1.369113991	-1.202171207	0.884659572	0.650055638	NO	NO	NO	NO
1	153488703	153495640	esv3587586	6937	NONE	0	0	0.001	0	-0.725535001	0.318481474	-0.999383828	-1.109502733	NO	NO	NO	NO
1	153490736	153492377	esv3587587	1641	NONE	0	0	0.002	0	0.29417769	1.498913035	-0.324994772	-0.456427289	NO	NO	NO	NO
1	153492615	153499861	esv3587588	7246	NONE	0.0008	0	0	0	-1.149169118	0.291096293	-0.886373554	-1.339809468	NO	NO	NO	NO
1	153831851	153841494	esv3587594	9643	NONE	0	0	0	0.0031	-0.554113028	1.179693299	-0.750116468	-0.259613374	NO	NO	NO	NO
1	153857280	153858282	esv3587595	1002	NONE	0.0106	0	0	0	-0.377623296	1.491068508	0.794652343	1.956459264	NO	NO	NO	NO
1	153861723	153862486	esv3587596	763	NONE	0	0.001	0	0	0.924397403	1.472811951	0.850570933	1.633409502	NO	NO	NO	NO
1	154008327	154009189	esv3587597	862	NONE	0	0	0.003	0.001	2.915854056	4.470701495	0.811278837	4.507907477	NO	NO	NO	NO
1	154080945	154084660	esv3587598	3715	NONE	0.062	0	0	0	0.818404204	2.423068158	1.46050176	1.026043145	NO	NO	NO	NO
1	154157587	154161373	esv3587601	3786	TPM3:1	0.0764	0	0	0	-0.183383634	0.952073549	-0.345142826	-0.903612507	NO	NO	NO	NO
1	154273874	154274869	esv3587602	995	NONE	0	0	0	0.0031	0.832004709	3.19000962	0.933382678	4.32206992	NO	NO	NO	NO
1	154286034	154290520	esv3587603	4486	NONE	0.0023	0	0	0	-0.17193816	1.265932535	0.414201738	0.69085119	NO	NO	NO	NO
1	154324167	154326407	esv3587604	2240	NONE	0.0008	0	0.001	0	-2.347798991	-1.206349153	-3.887025024	-3.575151786	NO	NO	NO	NO
1	154390119	154394580	esv3587606	4461	NONE	0	0	0.001	0	-2.06498338	0.786046852	-3.190375579	-0.570350916	NO	NO	NO	NO
1	154565017	154569267	esv3587607	4250	NONE	0	0	0	0	-0.253022396	0.432541525	-0.53396531	-0.37647775	NO	NO	NO	NO
1	154608519	154609101	esv3587608	582	NONE	0	0	0	0	2.865492617	3.267072318	4.222929874	1.451866501	NO	NO	NO	NO
1	154639081	154641227	esv3587609	2146	NONE	0	0	0.001	0.0613	-0.314951918	0.665555081	0.55813533	1.023650835	NO	NO	NO	NO
1	154854902	154856417	esv3587611	1515	NONE	0	0.0099	0	0	-1.188199581	0.473988679	-1.813978762	0.04114556	NO	NO	NO	NO
1	154993325	154994400	esv3587614	1075	NONE	0.0166	0	0	0	-1.095028659	1.073446268	-2.039500204	-0.020852557	NO	NO	NO	NO
1	155119597	155126766	esv3587618	7169	NONE	0.0008	0	0	0	-0.006823582	1.188002221	-0.147987817	-0.407242687	NO	NO	NO	NO
1	155424276	155428227	esv3587623	3951	NONE	0	0	0	0	0.743930609	0.688011923	0.952320864	0.318554275	NO	NO	NO	NO
1	155509462	155520806	esv3587625	11344	NONE	0.0008	0	0	0.001	0.012819469	1.324124542	-0.570148447	0.387333204	NO	NO	NO	NO
1	155515555	155519228	esv3587626	3673	NONE	0.0015	0	0	0	-0.420579502	1.418148287	-0.558585722	0.704143134	NO	NO	NO	NO
1	155613949	155617986	esv3587629	4037	NONE	0.0008	0	0	0	-0.296420755	1.711729069	0.367290338	0.561836556	NO	NO	NO	NO
1	155625172	155629443	esv3587630	4271	YY1AP1:2	0.0008	0	0	0	-1.193900082	0.023964659	-0.725107519	-0.264002016	NO	NO	NO	NO
1	155659699	155664464	esv3587631	4765	NONE	0.5174	0	0.002	0.001	0.772267542	1.875411149	0.864149919	-17.02180858	NO	NO	NO	YES
1	155662338	155666714	esv3587632	4376	NONE	0.152	0	0	0.002	0.696762705	1.413405765	0.365623322	-8.89246527	NO	NO	NO	YES
1	155733642	155736677	esv3587633	3035	GON4L:2	0	0.001	0	0	-0.451639306	1.03787174	-0.329831482	-0.307858314	NO	NO	NO	NO
1	156366196	156369001	esv3587637	2805	NONE	0	0	0.001	0	-0.050292078	1.364310046	-0.136423333	0.892560581	NO	NO	NO	NO
1	156491964	156495860	esv3587638	3896	IQGAP3:1	0	0.001	0	0	-0.747567813	-0.107140162	0.036612154	-0.214458094	NO	NO	NO	NO
1	156671984	156672739	esv3587640	755	NONE	0.0015	0.007	0	0	0.404612899	3.674804347	2.543959716	-0.477998243	NO	NO	NO	NO
1	156779569	156780722	esv3587642	1153	SH2D2A:1	0.0008	0	0	0	-0.578637512	0.391999042	-0.939219516	-0.781047078	NO	NO	NO	NO
1	157004017	157013471	esv3587644	9454	NONE	0	0	0.002	0	-1.226394434	-0.126004626	-0.302774666	-0.820547432	NO	NO	NO	NO
1	157033381	157036424	esv3587645	3043	NONE	0.0023	0	0	0	3.202990532	3.833589852	4.472580402	5.014008821	NO	NO	NO	NO
1	157087252	157088503	esv3587646	1251	NONE	0.0038	0	0	0	-1.593547374	-0.747450893	-2.136566217	-2.662028449	NO	NO	NO	NO
1	157172874	157176038	esv3587648	3164	NONE	0.0219	0.007	0.0417	0.0204	-6.779516434	-3.112062887	-3.028683003	1.177398055	YES	NO	NO	NO
1	157173860	157175390	esv3587649	1530	NONE	0.0726	0.1143	0.2321	0.1554	-14.31735069	-7.577093712	-8.856001311	-1.171555119	YES	YES	YES	NO
1	157415340	157415912	esv3587651	572	NONE	0	0	0.001	0	1.076001496	1.182945677	2.462435881	7.211545603	NO	NO	NO	NO
1	157540655	157540871	esv3587652	216	NONE	0.0862	0.3956	0.6101	0.5041	6.24317785	1.14523202	2.040358197	1.113375726	NO	NO	NO	NO
1	157556846	157558692	esv3587653	1846	FCRL4:2	0.0008	0	0	0	-0.248496958	-1.197795286	0.23161334	1.273151428	NO	NO	NO	NO
1	157674701	157677766	esv3587654	3065	NONE	0	0.001	0	0	-8.46E-05	-0.21279676	0.53844026	0.262735972	NO	NO	NO	NO
1	157695911	157698240	esv3587656	2329	NONE	0.0008	0	0	0	1.102721752	0.986549665	0.634740423	1.408472206	NO	NO	NO	NO
1	157763185	157771553	esv3587657	8368	FCRL1:8	0	0	0	0	0.068130795	-0.412406892	0.250986174	1.481007401	NO	NO	NO	NO
1	157986127	157989150	esv3587660	3023	NONE	0	0	0	0	-0.182768997	0.953759424	-0.767342806	-1.305372839	NO	NO	NO	NO
1	158192188	158203229	esv3587661	11041	NONE	0	0	0.001	0	0.006750747	0.923126217	0.963653244	-0.918327048	NO	NO	NO	NO
1	158204973	158209940	esv3587663	4967	NONE	0	0.002	0.002	0	-2.758147084	1.429527843	-0.647741071	8.224431011	NO	NO	NO	NO
1	158335827	158356444	esv3587664	20617	NONE	0.0008	0	0	0	0.392604976	0.478390843	0.877411187	-0.48190059	NO	NO	NO	NO
1	158336928	158340293	esv3587665	3365	NONE	0.0008	0	0	0.0031	0.69059859	0.258303205	0.689822305	0.753344707	NO	NO	NO	NO
1	158488410	158488679	esv3587671	269	NONE	0.5855	0.4751	0.5754	0.4182	-12.76237765	-11.73430413	-12.84475975	-17.83871656	YES	YES	YES	YES
1	158489615	158491973	esv3587672	2358	NONE	0	0.0099	0	0.001	-0.190005111	-0.407937268	-0.16511914	-0.972443929	NO	NO	NO	NO
1	158491780	158512804	esv3587673	21024	NONE	0	0.001	0	0	0.576047409	-0.080126009	0.288109192	-0.742900765	NO	NO	NO	NO
1	158492216	158497867	esv3587674	5651	NONE	0.0008	0.005	0	0	0.695589828	-0.040994951	0.247558829	-0.318796529	NO	NO	NO	NO
1	158694006	158727518	esv3587678	33512	OR6K6:1	0.0015	0	0	0	0.16781867	-0.863606734	-0.18589773	-0.726042672	NO	NO	NO	NO
1	158697228	158725677	esv3587680	28449	OR6K6:1	0.0008	0	0	0	0.133208829	-0.924232399	-0.160333539	-0.857883512	NO	NO	NO	NO
1	158726918	158728010	esv3587682	1092	NONE	0.0439	0.1541	0.1677	0.0634	0.298740433	0.95019854	-0.077376028	0.263334543	NO	NO	NO	NO
1	158774646	158779331	esv3587683	4685	NONE	0.0008	0	0	0	-0.944512081	-1.485983381	-0.750294447	-0.627637426	NO	NO	NO	NO
1	158786139	158787356	esv3587684	1217	NONE	0.0015	0	0	0	1.036029841	0.519272092	0.973688179	0.540412101	NO	NO	NO	NO
1	158813779	158823250	esv3587685	9471	MNDA:4	0	0	0	0	0.159493779	0.409831249	0.674986645	-0.202520948	NO	NO	NO	NO
1	158867540	158869980	esv3587687	2440	NONE	0.6997	0.7366	0.9623	0.7065	0.87713606	-0.712035728	0.665158364	0.014968931	NO	NO	NO	NO
1	158869480	158929632	esv3587688	60152	PYHIN1:8	0.0008	0	0	0	0.599433326	0.480517665	0.850487301	1.151714325	NO	NO	NO	NO
1	158961353	158966208	esv3587689	4855	NONE	0.1589	0.1332	0	0.0665	-0.204480675	1.14896843	0.053328984	1.749426888	NO	NO	NO	NO
1	159066091	159068301	esv3587693	2210	NONE	0	0.002	0.0129	0	0.391589719	-0.834424362	-0.513003841	0.647525818	NO	NO	NO	NO
1	159097185	159101594	esv3587694	4409	NONE	0	0	0.001	0	-0.44425472	-1.135353589	0.601846397	0.152466662	NO	NO	NO	NO
1	159120062	159125564	esv3587695	5502	NONE	0.0681	0	0	0	1.176680192	2.633173544	2.268557109	2.945522814	NO	NO	NO	NO
1	159648708	159649659	esv3587701	951	NONE	0.5628	0.7336	0.8244	0.5828	-0.880332085	-1.024052742	0.41566765	-0.306844909	NO	NO	NO	NO
1	159922334	159934118	esv3587705	11784	SLAMF9:3|LINC01133:1	0	0.001	0	0	-1.711073763	-1.370261186	-1.705168344	-0.160571326	NO	NO	NO	NO
1	159927064	159929248	esv3587706	2184	NONE	0	0.001	0	0.001	-1.294874704	-0.979663139	-1.743955426	0.832067133	NO	NO	NO	NO
1	159997328	160007677	esv3587707	10349	KCNJ10:1|PIGM:1	0.003	0	0	0	-0.54282246	0.152141689	-0.743480755	-0.966636393	NO	NO	NO	NO
1	160205012	160205624	esv3587710	612	NONE	0.0295	0	0	0	2.43678701	2.18923477	1.968268488	4.550592615	NO	NO	NO	NO
1	160284151	160288614	esv3587712	4463	SUMO1P3:1	0.0008	0	0	0	0.826029016	2.364894882	1.586793105	0.534429329	NO	NO	NO	NO
1	160377908	160380301	esv3587713	2393	NONE	0	0	0	0.001	-2.138081981	-2.8766828	-2.596587145	-3.319336545	NO	NO	NO	NO
1	160434462	160437598	esv3587714	3136	NONE	0.0038	0	0	0	0.388629723	0.623936928	0.373628494	-0.10752104	NO	NO	NO	NO
1	160564312	160565873	esv3587717	1561	NONE	0	0	0.004	0.002	3.339642605	5.461370349	5.536951535	3.598560814	NO	NO	NO	NO
1	160793171	160795177	esv3587718	2006	LY9:3	0	0	0.001	0	-1.823759526	-1.046890243	-1.084241943	-0.701496984	NO	NO	NO	NO
1	160846876	160851396	esv3587719	4520	ITLN1:3	0.0023	0	0	0	-0.71952569	-0.125845028	0.501944669	-0.595527976	NO	NO	NO	NO
1	160935117	160939846	esv3587720	4729	NONE	0.0023	0.008	0	0.002	0.20297172	0.591837344	-0.245677512	0.561110372	NO	NO	NO	NO
1	160953903	160960767	esv3587721	6864	NONE	0.0045	0.001	0	0	-0.713461966	0.340559731	-0.36730575	-0.709848643	NO	NO	NO	NO
1	160979498	160979991	esv3587722	493	NONE	0	0	0.0099	0.0031	-0.541089972	1.791841458	1.373528389	1.897896494	NO	NO	NO	NO
1	160997479	160999062	esv3587724	1583	NONE	0.0182	0	0	0	0.439743151	4.628463427	1.709203212	0.417660612	NO	NO	NO	NO
1	161264197	161265348	esv3587727	1151	NONE	0	0	0	0.001	0.389461315	-0.559877423	0.377487866	0.887583952	NO	NO	NO	NO
1	161344946	161346844	esv3587728	1898	SDHC:1	0	0	0.0119	0.001	1.011171989	1.925026446	0.777705805	-1.089761465	NO	NO	NO	NO
1	161519612	161593482	esv3587731	73870	FCGR2C:7|FCGR3A:4|FCGR3B:1|HSPA7:1	0.0461	0	0	0.001	0.628464443	0.862337834	8.000164333	2.064242681	NO	NO	NO	NO
1	161590275	161598101	esv3587734	7826	FCGR3B:2	0.0182	0.001	0.006	0.0041	-1.04956739	-0.309612999	9.699419982	-0.021671736	NO	NO	NO	NO
1	161667969	161669475	esv3587735	1506	NONE	0	0.001	0	0	1.691369054	3.283310861	2.258853201	3.37707421	NO	NO	NO	NO
1	161803548	161804775	esv3587737	1227	NONE	0.0023	0	0	0	4.01633051	7.727417694	8.913336408	9.357493811	NO	NO	NO	NO
1	162284037	162297142	esv3587746	13105	NONE	0	0	0	0.0031	-0.815302931	-0.972505047	-1.31314312	-0.276286297	NO	NO	NO	NO
1	162327297	162327767	esv3587747	470	NONE	0.0015	0.0179	0	0.001	0.454173075	1.077219052	-0.258153151	1.238884639	NO	NO	NO	NO
1	162420713	162427307	esv3587748	6594	NONE	0.0023	0	0	0	2.187469485	3.205646779	2.818438365	5.241818882	NO	NO	NO	NO
1	162611906	162613466	esv3587752	1560	NONE	0.0061	0	0	0	1.24985042	0.829945852	-0.51674696	1.121937292	NO	NO	NO	NO
1	162981626	162985728	esv3587755	4102	NONE	0	0.002	0.001	0.0092	-0.453735298	-0.133505494	-0.186171655	-0.60551203	NO	NO	NO	NO
1	162994088	162996436	esv3587756	2348	NONE	0	0	0	0.001	0.043372453	0.484902517	1.430727336	1.222400777	NO	NO	NO	NO
1	162999995	163000542	esv3587758	547	NONE	0	0	0.001	0	1.079709426	-2.347300777	0.925175208	4.402535253	NO	NO	NO	NO
1	163353841	163358256	esv3587767	4415	NONE	0	0	0	0.0031	0.779646724	0.100513337	0.574238843	-0.427812787	NO	NO	NO	NO
1	163393358	163394288	esv3587768	930	NONE	0	0	0	0.0031	-0.711990724	0.158983406	-1.353555536	0.599957953	NO	NO	NO	NO
1	163509733	163519444	esv3587771	9711	NONE	0	0	0.001	0	0.233994845	-0.721639414	0.252897538	-0.125988298	NO	NO	NO	NO
1	163551423	163552711	esv3587773	1288	NONE	0.0045	0	0	0	-0.176374639	-0.147760781	0.959460325	0.743526716	NO	NO	NO	NO
1	163657804	163659874	esv3587775	2070	NONE	0	0	0	0.001	0.10703248	0.228626195	1.115886038	0.711726614	NO	NO	NO	NO
1	163771302	163772034	esv3587776	732	NONE	0.0015	0	0	0	2.78405574	1.683733574	2.527554631	0.173708783	NO	NO	NO	NO
1	163919436	164067447	esv3587782	148011	NONE	0	0	0.001	0	0.307188495	0.598279965	0.563521891	0.010715559	NO	NO	NO	NO
1	163924058	163951813	esv3587783	27755	NONE	0	0	0	0	-0.027695641	0.394467056	0.462486413	0.046548477	NO	NO	NO	NO
1	163978613	164291546	esv3587784	312933	NONE	0	0	0.001	0	0.290433334	0.473299259	0.589835552	0.313020627	NO	NO	NO	NO
1	164275256	164280872	esv3587789	5616	NONE	0	0	0.002	0	0.124482694	-0.382171067	-0.057175066	-0.021031752	NO	NO	NO	NO
1	164335804	164337275	esv3587790	1471	NONE	0.0008	0	0	0.002	0.323365264	1.843885839	1.255763895	1.932428315	NO	NO	NO	NO
1	164493171	164495679	esv3587792	2508	NONE	0	0	0	0.001	-0.59640482	-0.472918425	-0.912043065	0.157470752	NO	NO	NO	NO
1	164495047	164506986	esv3587793	11939	NONE	0	0	0	0.0031	-0.056697162	0.285531863	-0.013209758	0.078633867	NO	NO	NO	NO
1	164748335	164751215	esv3587796	2880	NONE	0.0023	0	0	0	-1.410601517	-0.019177124	-1.180474831	0.640349212	NO	NO	NO	NO
1	164970080	164979150	esv3587797	9070	NONE	0	0	0	0.002	0.457240172	0.242321345	0.340229314	-0.649145794	NO	NO	NO	NO
1	165242325	165247004	esv3587801	4679	NONE	0	0	0	0	-1.600166638	-2.227068494	-1.447306948	-1.083016325	NO	NO	NO	NO
1	165421803	165424208	esv3587804	2405	NONE	0.0212	0	0	0	-1.296105295	-1.509687081	-1.773929286	-0.267813104	NO	NO	NO	NO
1	165469847	165474096	esv3587805	4249	LRRC52-AS1:1	0	0	0.001	0	-0.097986015	-1.219200332	0.209064966	-0.164522105	NO	NO	NO	NO
1	165535048	165547942	esv3587807	12894	LRRC52-AS1:2	0	0.001	0	0	-0.358996935	-0.470607749	-0.204109102	-0.36294659	NO	NO	NO	NO
1	165647386	165657118	esv3587809	9732	ALDH9A1:4	0	0.001	0	0	-0.113743253	0.557503514	0.191114938	-0.649451743	NO	NO	NO	NO
1	165780420	165786251	esv3587812	5831	NONE	0	0	0.001	0	0.30627138	1.027804203	0.754986076	1.11003538	NO	NO	NO	NO
1	165900427	165910268	esv3587815	9841	NONE	0.0023	0	0	0	-1.833431144	-1.248524003	-1.208976835	-1.248858695	NO	NO	NO	NO
1	165924175	165928174	esv3587817	3999	NONE	0	0.001	0	0	-1.566204923	-0.605275779	-1.058160788	-1.432004142	NO	NO	NO	NO
1	165939594	165960383	esv3587818	20789	NONE	0.0008	0	0	0	0.953451513	0.883827708	0.755867757	3.69174386	NO	NO	NO	NO
1	166212287	166230650	esv3587823	18363	NONE	0	0	0	0	2.550353461	2.460098537	2.437737848	6.890138792	NO	NO	NO	NO
1	166368662	166371088	esv3587824	2426	NONE	0	0	0.002	0	0.707638818	0.389485166	1.501096864	0.011841696	NO	NO	NO	NO
1	166372634	166379677	esv3587825	7043	NONE	0.0234	0.001	0.001	0	0.989328902	2.486641935	2.410164688	3.734220197	NO	NO	NO	NO
1	166396577	166397091	esv3587826	514	NONE	0.0303	0.001	0	0	-12.07340599	-2.070759681	4.793020984	5.467948036	YES	NO	NO	NO
1	166464462	166471329	esv3587828	6867	NONE	0.0023	0	0.001	0	2.385913931	3.471447917	3.679076328	5.22769624	NO	NO	NO	NO
1	166467730	166469861	esv3587829	2131	NONE	0.003	0	0	0	2.757399206	3.028348687	3.208517634	5.022467784	NO	NO	NO	NO
1	166534539	166582614	esv3587830	48075	FMO9P:3	0	0	0	0.0072	-0.104863328	-0.603607066	-0.20506754	0.071389083	NO	NO	NO	NO
1	166551470	166552838	esv3587831	1368	NONE	0.0855	0	0	0.002	0.374035162	-1.104883821	-0.483255891	2.079931453	NO	NO	NO	NO
1	166551580	166552537	esv3587832	957	NONE	0.0908	0	0	0.002	0.535360206	-1.298778434	-1.404750238	2.294415558	NO	NO	NO	NO
1	166575372	166579960	esv3587833	4588	NONE	0.0015	0	0	0.0072	0.597831347	0.531679821	0.269650792	1.115801628	NO	NO	NO	NO
1	166593731	166600777	esv3587834	7046	FMO9P:1	0	0	0.001	0	-0.214263069	-0.745377237	-0.494440178	-0.461036212	NO	NO	NO	NO
1	166725522	166734671	esv3587835	9149	NONE	0	0.001	0	0	0.362530714	0.1736476	0.655932817	1.303580238	NO	NO	NO	NO
1	166738108	166741604	esv3587836	3496	NONE	0.0008	0	0	0	0.069691903	0.128326855	0.330722705	0.041122865	NO	NO	NO	NO
1	166913224	166914642	esv3587840	1418	NONE	0	0.001	0	0	0.460859832	1.59484902	0.736617335	2.506592458	NO	NO	NO	NO
1	167013193	167014715	esv3587841	1522	NONE	0	0	0.004	0	-1.90266422	-0.938157586	-2.784039536	-1.522877787	NO	NO	NO	NO
1	167397917	167400055	esv3587846	2138	CD247:1	0	0	0.001	0	-2.630613206	0.082948742	-1.878398594	-1.57959314	NO	NO	NO	NO
1	167705049	167707545	esv3587852	2496	NONE	0	0	0	0	-0.551820027	0.970806359	-0.304636855	0.300026968	NO	NO	NO	NO
1	167710532	167715682	esv3587853	5150	NONE	0	0.004	0	0	-0.110034497	1.119832788	-0.33894515	0.276786057	NO	NO	NO	NO
1	167765305	167767578	esv3587855	2273	NONE	0	0.0268	0.001	0.0051	0.311738726	0.708619708	-1.037877133	-0.756401708	NO	NO	NO	NO
1	168089034	168091474	esv3587858	2440	NONE	0	0	0.0188	0	-0.896450185	-0.382183432	-0.46041608	0.786773041	NO	NO	NO	NO
1	168178392	168180378	esv3587859	1986	NONE	0	0	0	0	1.085371221	1.857689706	1.497017407	1.868267872	NO	NO	NO	NO
1	168287990	168290158	esv3587861	2168	NONE	0.0242	0.003	0	0	0.16992951	0.408911148	-0.492092096	0.150278547	NO	NO	NO	NO
1	168339770	168343714	esv3587862	3944	NONE	0	0.001	0	0	-0.979989611	-0.619369312	-0.900094027	-0.652078202	NO	NO	NO	NO
1	168427027	168428839	esv3587864	1812	NONE	0.0106	0.001	0.1637	0.0573	0.038749821	1.725123196	0.995415478	1.64039397	NO	NO	NO	NO
1	168457942	168470289	esv3587865	12347	LOC101928565:2	0	0	0	0.001	-0.340704347	-0.648206138	-0.355976537	-0.424790331	NO	NO	NO	NO
1	168546355	168548116	esv3587866	1761	NONE	0	0	0.0119	0.001	0.594989125	0.44581395	-0.105354533	0.932299337	NO	NO	NO	NO
1	168572217	168574233	esv3587867	2016	NONE	0	0.0119	0	0.001	-1.274497791	-0.392138248	0.935197212	1.053750536	NO	NO	NO	NO
1	168588587	168591185	esv3587868	2598	NONE	0	0	0	0	0.049874988	-0.07785757	-0.442532916	0.695678084	NO	NO	NO	NO
1	168656035	168662881	esv3587870	6846	NONE	0	0	0	0.001	-0.895164762	-1.25459272	-0.635443106	0.316909986	NO	NO	NO	NO
1	168855801	168856719	esv3587874	918	NONE	0	0	0.001	0	1.65444581	0.954888977	2.959501986	0.600521143	NO	NO	NO	NO
1	168940831	168945012	esv3587876	4181	NONE	0.0008	0	0	0	-0.035951234	-1.026412507	-0.751661058	0.360414574	NO	NO	NO	NO
1	169004356	169005229	esv3587877	873	NONE	0.0068	0.1531	0.0179	0.0348	-14.07303193	-12.95151069	-13.97043172	0.809307742	YES	YES	YES	NO
1	169042039	169049308	esv3587878	7269	NONE	0	0	0.001	0	0.158959339	0.309999826	0.432583636	-0.410515864	NO	NO	NO	NO
1	169144201	169148085	esv3587879	3884	NONE	0.0091	0	0	0	-0.145688878	0.140137829	-0.830980108	-0.402532835	NO	NO	NO	NO
1	169225213	169245324	esv3587880	20111	NONE	0.1067	0.3837	0.1369	0.2096	1.151232392	1.707153312	1.60058355	2.627920604	NO	NO	NO	NO
1	169320169	169327928	esv3587881	7759	NONE	0	0.002	0	0	0.57108005	-0.180292912	-0.499893515	-0.891651637	NO	NO	NO	NO
1	169575744	169581855	esv3587886	6111	SELP:4	0.0023	0	0	0	-1.561245073	-0.734285537	-1.397519334	0.048727988	NO	NO	NO	NO
1	170123706	170128283	esv3587888	4577	NONE	0.0008	0.003	0	0.001	1.165142346	0.652297968	0.376715302	-0.270401154	NO	NO	NO	NO
1	170264810	170265413	esv3587892	603	NONE	0	0.001	0	0	5.162855372	0.906679071	5.282512159	-0.27372573	NO	NO	NO	NO
1	170296639	170299904	esv3587893	3265	NONE	0	0	0.001	0	0.173665333	-0.773502521	-0.039937736	0.3543857	NO	NO	NO	NO
1	170367467	170387279	esv3587894	19812	NONE	0.0091	0	0	0	0.19357498	-0.207886461	0.036910519	0.120031843	NO	NO	NO	NO
1	170414079	170419476	esv3587897	5397	NONE	0	0	0	0.001	-0.013335559	-0.722728111	0.148764707	0.612555057	NO	NO	NO	NO
1	170459394	170461575	esv3587898	2181	NONE	0	0.002	0	0.002	0.95231714	-0.254115825	-0.725501816	0.235373603	NO	NO	NO	NO
1	170617659	170618579	esv3587901	920	NONE	0	0.0099	0	0	1.559335099	0.740220144	0.188749694	1.210158645	NO	NO	NO	NO
1	170639048	170641038	esv3587902	1990	NONE	0.0008	0	0.001	0	-0.981744646	-0.577687001	-2.890994494	-1.537138791	NO	NO	NO	NO
1	170742233	170744090	esv3587904	1857	NONE	0	0	0.001	0	-1.364086511	-0.971594697	-1.012070316	-0.489601135	NO	NO	NO	NO
1	170973880	170975099	esv3587909	1219	NONE	0.0023	0	0	0	1.72059948	1.869587918	2.116010994	0.540439109	NO	NO	NO	NO
1	171007945	171012761	esv3587911	4816	NONE	0.0008	0	0	0	0.954952204	-0.41583771	1.123759102	0.848066737	NO	NO	NO	NO
1	171094414	171099078	esv3587912	4664	NONE	0	0	0.001	0	-0.528243816	-0.498333011	-0.377583812	0.170281798	NO	NO	NO	NO
1	171408915	171411997	esv3587915	3082	NONE	0.0083	0	0	0	-0.08589529	0.211064015	-0.831195718	0.647878778	NO	NO	NO	NO
1	171423106	171424970	esv3587916	1864	NONE	0.0023	0	0.001	0	0.394602697	2.244042872	0.358548603	1.201747254	NO	NO	NO	NO
1	172177959	172179914	esv3587919	1955	NONE	0	0	0.001	0	-0.721359574	0.003524858	0.662661172	0.751578404	NO	NO	NO	NO
1	172233527	172247439	esv3587920	13912	NONE	0	0	0	0.001	0.318362975	-0.066731789	-0.148268163	0.225660981	NO	NO	NO	NO
1	172271841	172277301	esv3587922	5460	NONE	0	0	0.001	0	2.012087502	2.831571231	3.273963634	4.77650284	NO	NO	NO	NO
1	172315193	172319822	esv3587923	4629	NONE	0	0	0.001	0	0.412622	0.749769014	0.405993857	-0.65927901	NO	NO	NO	NO
1	172389164	172396114	esv3587924	6950	C1orf105:1	0	0	0.001	0	-0.785696742	-2.76623742	-1.376388015	-0.083063069	NO	NO	NO	NO
1	172471457	172474621	esv3587925	3164	NONE	0	0	0	0.0031	-0.307455632	-0.200149036	-1.010285075	-0.063650166	NO	NO	NO	NO
1	172680276	172682397	esv3587929	2121	NONE	0	0	0	0.0061	0.91985713	-0.670389819	-0.313187262	-0.302673362	NO	NO	NO	NO
1	172682629	172684433	esv3587930	1804	NONE	0.0015	0	0	0	1.501593713	-0.005561323	2.291713113	-1.219983186	NO	NO	NO	NO
1	172759295	172762008	esv3587931	2713	NONE	0.0189	0	0	0	-0.416432575	-1.042457539	-0.476756426	-1.001248995	NO	NO	NO	NO
1	172779623	172780418	esv3587932	795	NONE	0	0	0.001	0	1.346959603	0.780761551	0.702686041	1.438876769	NO	NO	NO	NO
1	172825753	172826886	esv3587933	1133	NONE	0	0	0.006	0	-0.300849476	-0.660183627	0.054153098	0.362368467	NO	NO	NO	NO
1	172829684	172831859	esv3587934	2175	NONE	0	0	0.002	0	0.309067967	1.59250038	2.476053482	0.087109682	NO	NO	NO	NO
1	172864497	172865128	esv3587935	631	NONE	0.0008	0.001	0	0	3.415977197	0.42061581	2.530276888	2.684104211	NO	NO	NO	NO
1	172918529	172923672	esv3587936	5143	NONE	0	0	0.005	0.001	-0.54522257	-1.204115388	-0.950597291	1.043799478	NO	NO	NO	NO
1	173072021	173076304	esv3587937	4283	NONE	0.0008	0	0	0	0.776797216	-0.408339925	0.202857495	-1.926919673	NO	NO	NO	NO
1	173075628	173089150	esv3587938	13522	NONE	0.0023	0	0	0	-0.118423572	-0.529601286	-0.017122721	-0.222442558	NO	NO	NO	NO
1	173077931	173079752	esv3587939	1821	NONE	0.0008	0.001	0	0	-0.285792092	-0.150813007	-0.406149187	1.492016972	NO	NO	NO	NO
1	173083711	173084964	esv3587940	1253	NONE	0.003	0	0	0	0.516931599	0.010433213	0.986729416	0.061218726	NO	NO	NO	NO
1	173304555	173308034	esv3587941	3479	NONE	0	0	0	0.0041	-1.457793871	-0.641215864	-0.882284797	-0.139912995	NO	NO	NO	NO
1	173523777	173524931	esv3587945	1154	SLC9C2:1	0	0	0.001	0	-0.654508928	0.875876772	0.081535875	0.730479353	NO	NO	NO	NO
1	173543896	173544936	esv3587946	1040	NONE	0.0068	0	0	0	0.59469753	1.46806092	1.13771186	2.868496731	NO	NO	NO	NO
1	173811663	173813580	esv3587949	1917	NONE	0	0	0.001	0	-1.159609211	0.163295888	0.318581803	0.483718781	NO	NO	NO	NO
1	173963382	173968155	esv3587950	4773	NONE	0.0038	0	0	0	0.345462608	0.479181824	-1.233935088	0.510702835	NO	NO	NO	NO
1	173972260	173976253	esv3587951	3993	NONE	0	0	0.003	0	-0.020287939	1.264651988	-0.077148369	0.471579907	NO	NO	NO	NO
1	174159273	174162537	esv3587955	3264	NONE	0	0	0.001	0	0.832611424	0.534548091	-0.055875371	-0.06919056	NO	NO	NO	NO
1	174219098	174221600	esv3587956	2502	RABGAP1L:1	0	0.001	0	0	1.195951438	1.419646352	0.865529325	-0.548122399	NO	NO	NO	NO
1	174285613	174290473	esv3587957	4860	NONE	0	0	0	0	0.239322083	0.968732108	0.862492452	-0.655063269	NO	NO	NO	NO
1	174559063	174579867	esv3587964	20804	NONE	0	0	0	0.001	1.891232084	1.196493878	2.025454436	6.11910979	NO	NO	NO	NO
1	174583343	174588163	esv3587965	4820	NONE	0.0008	0	0	0	1.46174466	3.475698129	4.11103787	3.940220048	NO	NO	NO	NO
1	174611702	174619381	esv3587966	7679	NONE	0.0091	0	0.001	0	1.69665573	3.032139715	2.439383983	2.881441096	NO	NO	NO	NO
1	174654509	174655916	esv3587967	1407	NONE	0	0	0.001	0	-1.307081974	1.092336406	-0.651746675	-0.083874376	NO	NO	NO	NO
1	174796517	174801833	esv3587968	5316	NONE	0.0658	0.1133	0.2073	0.1677	-0.485819099	0.102921903	0.112161896	-0.385284829	NO	NO	NO	NO
1	174802918	174819152	esv3587969	16234	NONE	0	0	0.003	0	2.259041842	2.167017031	1.617040978	6.574250857	NO	NO	NO	NO
1	174894014	174898990	esv3587972	4976	NONE	0	0.001	0.002	0.001	-0.173984069	0.943603414	0.232117655	-0.868379011	NO	NO	NO	NO
1	175022467	175026204	esv3587974	3737	NONE	0.0772	0	0	0	-0.720389142	-0.252603414	-0.128086552	1.098335138	NO	NO	NO	NO
1	175152408	175164297	esv3587982	11889	KIAA0040:3	0	0.001	0.001	0	-1.695230063	-0.525868378	-2.013105342	-1.325374323	NO	NO	NO	NO
1	175236870	175239300	esv3587985	2430	NONE	0	0.001	0	0	-1.113392659	-1.541488867	-1.084730686	0.820697011	NO	NO	NO	NO
1	175342011	175345164	esv3587986	3153	NONE	0.0015	0	0	0	-1.922576424	-1.666656582	-1.856310065	-0.656734128	NO	NO	NO	NO
1	175411521	175412145	esv3587988	624	NONE	0.0499	0	0	0	1.403309656	-0.446284283	-0.622802013	0.877932665	NO	NO	NO	NO
1	175705861	175709149	esv3587992	3288	NONE	0.0008	0	0	0	-0.522470194	-0.318443246	-0.058465273	1.422092043	NO	NO	NO	NO
1	175744322	175747272	esv3587993	2950	NONE	0	0	0	0.0327	1.306992477	1.674199931	0.978305723	0.543291528	NO	NO	NO	NO
1	175965530	175978487	esv3587996	12957	NONE	0.0008	0	0	0	3.143969281	4.051639017	4.712805828	8.332694629	NO	NO	NO	NO
1	176097042	176097543	esv3587998	501	NONE	0	0	0	0	1.368320102	2.188613072	3.832780316	1.07671992	NO	NO	NO	NO
1	176507556	176508175	esv3588004	619	NONE	0	0	0.001	0	0.609314966	0.75063385	0.609424059	3.113725427	NO	NO	NO	NO
1	176590892	176613110	esv3588006	22218	NONE	0.0008	0	0	0	0.216494266	0.090082741	0.24832153	1.77237122	NO	NO	NO	NO
1	176694104	176831196	esv3588008	137092	PAPPA2:11|ASTN1:3	0.0008	0	0	0	-0.502504712	-0.791104603	-0.54915482	-0.079694079	NO	NO	NO	NO
1	177114951	177117569	esv3588011	2618	NONE	0.0015	0	0	0	1.465308377	0.61570232	0.450873737	0.664007977	NO	NO	NO	NO
1	177502914	177506138	esv3588014	3224	NONE	0	0	0.002	0	0.14859953	0.828193992	1.474351124	-0.027245792	NO	NO	NO	NO
1	177509016	177560091	esv3588015	51075	NONE	0	0	0.002	0	-0.127160638	-0.540648836	-0.007888277	-0.180944453	NO	NO	NO	NO
1	177544393	177549365	esv3588017	4972	NONE	0.0008	0	0.001	0	-1.140273136	-1.728827739	-0.441749059	0.41181636	NO	NO	NO	NO
1	177568347	177571210	esv3588018	2863	NONE	0	0	0	0.001	-0.291033849	0.087924458	1.150536261	0.661837606	NO	NO	NO	NO
1	177679646	177694101	esv3588019	14455	NONE	0	0	0	0.001	0.190747728	1.268915594	1.05911153	0.591522966	NO	NO	NO	NO
1	177759152	177759907	esv3588021	755	NONE	0.0038	0	0	0	0.819257721	0.027918741	2.368652821	2.06937945	NO	NO	NO	NO
1	177946159	177952092	esv3588024	5933	NONE	0.0008	0	0	0	-0.947265459	-0.528322451	-0.227111023	-0.364969897	NO	NO	NO	NO
1	178119743	178127646	esv3588029	7903	NONE	0	0	0.001	0	-0.220343395	-0.13648733	-1.138865926	-8.318142959	NO	NO	NO	YES
1	178219150	178223305	esv3588030	4155	NONE	0.0008	0	0	0	0.763519736	1.098151217	0.200522121	-0.701583515	NO	NO	NO	NO
1	178292965	178298653	esv3588031	5688	NONE	0	0	0	0.001	0.603389071	-0.043846151	-0.527039223	0.408943091	NO	NO	NO	NO
1	178293727	178301869	esv3588032	8142	NONE	0	0	0	0.001	0.383568208	0.290190891	-0.884149173	0.335421504	NO	NO	NO	NO
1	178296172	178297171	esv3588033	999	NONE	0	0	0	0	1.600229511	0.962371751	0.442207284	-0.54610256	NO	NO	NO	NO
1	178495321	178495683	esv3588037	362	NONE	0.3086	0.3579	0.4177	0.3722	1.550377474	1.437231568	1.615486942	4.984291436	NO	NO	NO	NO
1	178530685	178531656	esv3588038	971	NONE	0.0015	0	0	0	0.072409727	2.283221213	0.319132872	2.558217119	NO	NO	NO	NO
1	178659627	178676241	esv3588039	16614	NONE	0.0174	0	0	0	0.143879852	-0.10526784	-0.182648649	-0.065346899	NO	NO	NO	NO
1	178892147	178896948	esv3588041	4801	NONE	0.0083	0	0	0	0.477668666	-0.054247643	1.61961842	1.278784609	NO	NO	NO	NO
1	178899099	178900596	esv3588042	1497	NONE	0.0015	0	0	0	-0.622508385	-0.183724679	-0.272544044	0.784381687	NO	NO	NO	NO
1	178948071	178975829	esv3588043	27758	NONE	0	0	0.003	0	1.123760507	1.707699998	1.240508618	3.279277935	NO	NO	NO	NO
1	178977299	178979944	esv3588045	2645	NONE	0.0015	0.003	0	0	-1.029745575	0.107623105	-0.774526897	0.170583861	NO	NO	NO	NO
1	179064372	179066726	esv3588046	2354	TOR3A:1	0	0	0	0	-0.001452635	-0.404411551	-0.661367486	0.080277686	NO	NO	NO	NO
1	179179927	179186698	esv3588047	6771	NONE	0	0	0.001	0	-0.024037492	0.831341441	-0.407026735	-0.493501594	NO	NO	NO	NO
1	179252217	179266390	esv3588049	14173	SOAT1:2	0	0	0.001	0	-0.932419216	0.472334493	-1.415569704	-0.340722241	NO	NO	NO	NO
1	179329682	179333698	esv3588050	4016	NONE	0.2738	0.0547	0	0.0204	-12.91935636	-10.89996895	-12.62413542	0.556873945	YES	YES	YES	NO
1	179402123	179405110	esv3588052	2987	NONE	0.0008	0	0	0	1.802004898	2.526774037	2.573832903	2.294009068	NO	NO	NO	NO
1	179455593	179458303	esv3588053	2710	NONE	0.1952	0.0537	0	0.0204	-13.18272278	-11.00952598	-12.75706542	-1.039937073	YES	YES	YES	NO
1	179467369	179469919	esv3588054	2550	NONE	0	0.001	0	0.002	0.547132111	-0.049199413	0.28353199	0.651151893	NO	NO	NO	NO
1	179607260	179608065	esv3588056	805	NONE	0.2708	0.3996	0.369	0.3916	1.493566855	-0.706859882	0.394272529	-18.53148283	NO	NO	NO	YES
1	179806409	179807811	esv3588060	1402	NONE	0.0008	0.0358	0	0.0256	0.066498352	0.463039856	-0.225814198	-0.900668526	NO	NO	NO	NO
1	179931044	179939668	esv3588061	8624	NONE	0.003	0	0	0	0.304817919	1.466322873	-0.128042403	-0.005306427	NO	NO	NO	NO
1	180224367	180233381	esv3588063	9014	NONE	0	0	0.001	0	-2.375497315	-2.330092721	-3.09715322	-2.945864584	NO	NO	NO	NO
1	180228401	180230408	esv3588064	2007	NONE	0.0484	0	0	0	-3.077922347	-3.859995937	-4.816811686	-4.044871732	NO	NO	NO	NO
1	180272299	180273830	esv3588066	1531	NONE	0.0038	0.0666	0.0129	0.0675	-1.567606553	0.954949257	-1.943398696	10.85524657	NO	NO	NO	NO
1	180277581	180279340	esv3588067	1759	NONE	0	0.003	0	0	1.208859953	0.653839585	0.117593693	1.046620823	NO	NO	NO	NO
1	180401012	180406771	esv3588068	5759	NONE	0.0015	0	0	0	0.19047807	1.266613807	0.74083135	0.135946394	NO	NO	NO	NO
1	180749765	180755414	esv3588073	5649	NONE	0.0008	0.008	0	0.0082	0.466248533	0.499773705	0.92043136	-1.049681386	NO	NO	NO	NO
1	181038170	181038944	esv3588076	774	NONE	0.003	0	0	0.0123	1.704829143	1.731284701	0.935960621	1.126317628	NO	NO	NO	NO
1	181043348	181043808	esv3588077	460	NONE	0.4743	0.2157	0.2946	0.2045	2.46007409	3.7790882	0.692280639	5.870256175	NO	NO	NO	NO
1	181162357	181166830	esv3588080	4473	NONE	0	0	0	0.002	-0.344453514	0.744131728	0.182960318	2.173752361	NO	NO	NO	NO
1	181360321	181361831	esv3588084	1510	NONE	0	0	0.001	0	0.172899617	0.92561366	0.35262353	-1.592475984	NO	NO	NO	NO
1	181418213	181426320	esv3588085	8107	NONE	0	0	0.002	0	-1.349050773	-1.48874427	-0.557287802	-0.290749591	NO	NO	NO	NO
1	181504939	181511000	esv3588086	6061	NONE	0.0008	0	0	0	-0.622230331	-0.286546632	0.040160177	0.176752285	NO	NO	NO	NO
1	181651191	181655188	esv3588089	3997	NONE	0.0008	0	0	0	-1.145095348	-0.683820876	-0.836344936	0.642082624	NO	NO	NO	NO
1	182072421	182079492	esv3588095	7071	NONE	0.0008	0	0	0	0.274414418	0.346268928	-0.046856034	-0.890927891	NO	NO	NO	NO
1	182083762	182087583	esv3588096	3821	NONE	0.0008	0.005	0	0.001	-1.292630483	0.125182729	0.125495349	-0.843046267	NO	NO	NO	NO
1	182173083	182188083	esv3588097	15000	LINC01344:1	0	0	0.001	0	-1.168289385	-1.038346451	-0.666581539	-0.252502247	NO	NO	NO	NO
1	182233968	182238736	esv3588098	4768	NONE	0	0	0	0.0031	-0.581380934	-0.794819216	-0.651273168	0.304767433	NO	NO	NO	NO
1	182270462	182271818	esv3588099	1356	NONE	0.0008	0	0	0	0.614075807	-0.046185775	-0.996341048	-0.034101399	NO	NO	NO	NO
1	182317642	182320956	esv3588102	3314	NONE	0	0.001	0	0.001	-0.898650117	-0.699714592	0.020312754	0.097432522	NO	NO	NO	NO
1	182546284	182547847	esv3588104	1563	NONE	0	0	0	0.001	2.26825965	2.795237065	0.451997752	0.544056245	NO	NO	NO	NO
1	182603466	182606989	esv3588105	3523	NONE	0	0	0	0	-1.656945407	-0.051000631	-1.536988739	-0.506529404	NO	NO	NO	NO
1	182776909	182782177	esv3588106	5268	NPL:1	0	0.006	0	0	-1.330157767	0.428019645	0.192299918	-0.249356427	NO	NO	NO	NO
1	182924229	182926708	esv3588107	2479	NONE	0	0	0	0	-1.370046866	-0.428046634	-1.183751529	-1.051346614	NO	NO	NO	NO
1	183140506	183142687	esv3588108	2181	NONE	0	0	0	0.001	0.057314171	-0.360938331	0.412365323	-0.352512736	NO	NO	NO	NO
1	183263797	183266905	esv3588109	3108	NONE	0	0	0	0.0051	-0.330683992	0.985844497	-0.0487125	0.221683682	NO	NO	NO	NO
1	183308627	183309115	esv3588111	488	NONE	0	0	0.0179	0.001	-13.22853497	-12.33498897	-13.38418047	4.580108138	YES	YES	YES	NO
1	183367337	183371646	esv3588112	4309	NONE	0	0	0.002	0	3.834448357	4.794266785	4.454648237	9.051242754	NO	NO	NO	NO
1	183414728	183415409	esv3588113	681	NONE	0	0.001	0	0	1.399409472	-0.787800549	-0.884435623	3.233966217	NO	NO	NO	NO
1	183582395	183588398	esv3588115	6003	NONE	0.0091	0	0	0.001	-0.080400989	-0.879239321	-2.264137779	8.209399198	NO	NO	NO	NO
1	183698270	183701140	esv3588116	2870	NONE	0.0015	0	0	0	-0.113884345	-0.896167469	-0.005243811	-0.420397477	NO	NO	NO	NO
1	184379724	184384903	esv3588125	5179	NONE	0	0	0	0	-0.322026919	0.345130135	-0.851007749	-0.352182838	NO	NO	NO	NO
1	184402327	184403489	esv3588126	1162	NONE	0	0	0	0	-0.147435233	0.634026977	-0.785626637	1.970637508	NO	NO	NO	NO
1	184440920	184442963	esv3588127	2043	NONE	0	0	0	0	1.165051755	0.912404187	-0.900631989	1.174664469	NO	NO	NO	NO
1	184609042	184614900	esv3588128	5858	NONE	0.0008	0	0	0	-1.412232251	-0.067623206	-1.048036065	-1.207819996	NO	NO	NO	NO
1	184883929	184886433	esv3588130	2504	NONE	0	0	0	0.001	0.220025431	1.154317035	0.509920162	0.012817889	NO	NO	NO	NO
1	184961168	184971021	esv3588132	9853	LINC01633:1	0.0113	0	0	0.001	-0.073290254	-0.46972317	-0.412091193	0.095315783	NO	NO	NO	NO
1	185009806	185011738	esv3588133	1932	NONE	0.1528	0.0577	0.121	0.0951	-0.509981672	0.137270133	-0.701849257	-0.231215535	NO	NO	NO	NO
1	185033403	185042606	esv3588134	9203	NONE	0	0	0	0	-0.438877145	0.461848107	0.345856414	-0.646954967	NO	NO	NO	NO
1	185416344	185418601	esv3588136	2257	NONE	0	0.006	0	0.0031	0.21257666	-0.394852013	1.122571879	0.050918403	NO	NO	NO	NO
1	185711592	185717776	esv3588143	6184	NONE	0	0.001	0	0	-0.293232663	-0.407292363	-0.157422015	-0.246562005	NO	NO	NO	NO
1	185783709	185785298	esv3588145	1589	NONE	0.1467	0.0089	0	0	0.290717198	-5.141983408	-6.409710307	-16.60257307	NO	YES	YES	YES
1	185857064	185861682	esv3588146	4618	NONE	0.1997	0.002	0	0	4.858455819	3.598743024	3.837113798	13.90134803	NO	NO	NO	NO
1	186551957	186553834	esv3588152	1877	NONE	0	0.002	0	0	-0.149866857	1.539909353	0.292989299	2.659543437	NO	NO	NO	NO
1	186675494	186680366	esv3588153	4872	NONE	0	0	0.002	0	0.089689296	-0.109202223	-0.58048448	-0.150404182	NO	NO	NO	NO
1	186742716	186762852	esv3588155	20136	NONE	0	0	0.001	0	0.404776426	-0.159291898	-0.25786645	-0.529597949	NO	NO	NO	NO
1	186744802	186758369	esv3588157	13567	NONE	0	0	0.001	0	0.580501522	-0.296444843	-0.19586144	0.023793886	NO	NO	NO	NO
1	186784055	186791488	esv3588158	7433	NONE	0.0053	0	0	0	0.391060592	0.356658896	0.50152708	0.069027098	NO	NO	NO	NO
1	186965858	186975537	esv3588160	9679	NONE	0	0	0	0.002	0.143732125	-0.170944588	-0.342033889	-0.041312287	NO	NO	NO	NO
1	187065865	187068368	esv3588162	2503	NONE	0	0	0	0.001	0.888045242	1.11769186	1.983194773	1.429312216	NO	NO	NO	NO
1	187295957	187301311	esv3588163	5354	LINC01036:1	0.0401	0	0	0	0.931722692	0.329836563	0.640984381	-0.116665754	NO	NO	NO	NO
1	187399793	187405046	esv3588164	5253	NONE	0.0113	0	0	0	1.462804351	0.071437421	0.680627303	0.278464144	NO	NO	NO	NO
1	187464747	187466829	esv3588165	2082	NONE	0.7693	0.7575	0.9772	0.9356	-11.35156475	-9.69541181	-10.84443077	-15.08932601	YES	YES	YES	YES
1	187572707	187582112	esv3588168	9405	NONE	0.0401	0	0	0	0.788889076	0.033779888	0.775839166	-0.667962513	NO	NO	NO	NO
1	187584672	187586538	esv3588169	1866	NONE	0.0076	0	0	0	-2.256292666	-2.653078883	-0.98700393	-4.96161961	NO	NO	NO	NO
1	187593646	187596895	esv3588170	3249	NONE	0.0401	0	0	0	0.557534432	-0.641225233	-0.357223709	0.205399135	NO	NO	NO	NO
1	187601308	187613985	esv3588171	12677	NONE	0	0	0	0.001	0.524681714	-0.306680983	0.069362603	0.631150273	NO	NO	NO	NO
1	187609013	187609855	esv3588172	842	NONE	0	0	0.001	0	1.054360234	0.661475992	1.442878346	0.652047646	NO	NO	NO	NO
1	187636899	187670747	esv3588174	33848	NONE	0.0038	0	0	0	0.492536919	-0.750152421	0.294796028	-0.709756204	NO	NO	NO	NO
1	187639143	187779700	esv3588175	140557	NONE	0.003	0	0	0	0.530700746	-0.239030009	0.318759991	0.235176108	NO	NO	NO	NO
1	187716053	187722514	esv3588176	6461	NONE	0.0514	0.4682	0.0099	0.2761	-0.650374417	-0.707715046	0.003712342	0.070053317	NO	NO	NO	NO
1	187722248	187772437	esv3588177	50189	NONE	0.0038	0	0	0	0.684549777	-0.153567276	0.083062415	0.212388154	NO	NO	NO	NO
1	187748853	187772003	esv3588178	23150	NONE	0.003	0	0	0	0.464294149	-0.799401403	-0.366144204	-0.59930358	NO	NO	NO	NO
1	187932575	187933145	esv3588179	570	NONE	0	0	0.001	0.0286	1.970549664	-12.36681682	-13.55928569	-18.5633557	NO	YES	YES	YES
1	187939345	187947743	esv3588180	8398	NONE	0.0038	0	0	0	0.840674521	-0.265959295	0.144209142	-0.454610123	NO	NO	NO	NO
1	188009545	188013645	esv3588183	4100	NONE	0	0	0	0.0031	0.442418751	-0.400983743	-0.001785012	-0.322670335	NO	NO	NO	NO
1	188023767	188044569	esv3588184	20802	NONE	0	0	0.001	0	-0.016693039	-0.060593343	0.784698731	-0.300270421	NO	NO	NO	NO
1	188037021	188037963	esv3588185	942	NONE	0	0	0	0.001	3.511212481	1.721698471	3.9274326	-0.166223912	NO	NO	NO	NO
1	188207267	188213728	esv3588189	6461	NONE	0.0008	0	0	0	0.455501145	-0.517583582	-0.344540869	-0.636921861	NO	NO	NO	NO
1	188226597	188229421	esv3588190	2824	NONE	0	0	0.001	0	-0.662487745	0.059677004	0.706341196	0.102844162	NO	NO	NO	NO
1	188374208	188381549	esv3588193	7341	NONE	0	0.001	0	0	1.768903575	-0.057841328	0.005120178	-0.264574538	NO	NO	NO	NO
1	188391080	188393503	esv3588194	2423	NONE	0	0.001	0	0	1.4788481	1.149157478	1.91656651	-0.757784	NO	NO	NO	NO
1	188458629	188461118	esv3588196	2489	NONE	0.0038	0	0	0	0.930060287	-0.759660677	-0.558035568	-0.175588827	NO	NO	NO	NO
1	188523441	188530427	esv3588198	6986	NONE	0	0	0	0.002	2.251612194	1.349343555	2.73986881	4.89863935	NO	NO	NO	NO
1	188539457	188540228	esv3588199	771	NONE	0.8858	0.9264	1	0.9693	3.726326966	1.65153419	2.797370267	-18.80159271	NO	NO	NO	YES
1	188573787	188575914	esv3588202	2127	NONE	0	0	0	0.002	2.105838943	-0.25727982	0.627720187	0.114184234	NO	NO	NO	NO
1	188671511	188810380	esv3588205	138869	NONE	0	0	0	0	0.651688397	-0.002196548	0.464476687	0.416503204	NO	NO	NO	NO
1	188710495	188716060	esv3588206	5565	NONE	0	0	0	0	0.827431841	0.213678275	0.125929507	0.87727497	NO	NO	NO	NO
1	188759404	188765241	esv3588208	5837	NONE	0	0.001	0	0	0.13333392	-0.808234592	-0.178740768	-0.840053263	NO	NO	NO	NO
1	188822339	188865867	esv3588211	43528	NONE	0.0008	0	0.005	0	0.354556922	-0.588067115	-0.066836517	-1.118461323	NO	NO	NO	NO
1	188829814	188835708	esv3588212	5894	NONE	0.0008	0.001	0	0	0.716926964	-0.147057709	0.061823478	-1.917642292	NO	NO	NO	NO
1	188891517	189005395	esv3588219	113878	NONE	0	0	0	0	0.40729877	-0.346744711	-0.017603332	-0.603531815	NO	NO	NO	NO
1	188959002	188966468	esv3588222	7466	NONE	0.0151	0	0	0	0.43141803	-0.536736442	-0.414385226	-0.226671024	NO	NO	NO	NO
1	188972875	189006599	esv3588223	33724	NONE	0	0	0	0	0.814040921	-0.226905406	0.32649826	-0.519561954	NO	NO	NO	NO
1	189026116	189031236	esv3588227	5120	NONE	0.0045	0.0159	0	0	1.060331953	0.45424712	0.446696908	-3.614280818	NO	NO	NO	NO
1	189071717	189077756	esv3588231	6039	NONE	0.0045	0	0	0	1.446909694	0.219476974	0.278323481	-1.980973228	NO	NO	NO	NO
1	189087087	189093638	esv3588234	6551	NONE	0.0061	0	0	0	0.731084216	-0.586612936	0.455135649	-1.232154834	NO	NO	NO	NO
1	189123895	189133498	esv3588236	9603	NONE	0.0015	0	0	0	1.208650637	0.356836338	1.221714353	1.122242203	NO	NO	NO	NO
1	189200860	189201831	esv3588237	971	NONE	0.0121	0.0219	0	0.0164	-13.03247164	-5.46023529	-12.52805508	-17.45521463	YES	YES	YES	YES
1	189243964	189246900	esv3588239	2936	NONE	0.1006	0	0	0	1.877743469	0.106965809	1.456397179	-0.166426737	NO	NO	NO	NO
1	189269838	189273612	esv3588241	3774	NONE	0.0008	0	0	0	0.686684866	-0.765525289	-0.301096066	0.195899816	NO	NO	NO	NO
1	189325461	189362830	esv3588246	37369	NONE	0	0	0.0198	0	1.153077633	0.214199325	0.679839768	0.354758764	NO	NO	NO	NO
1	189325961	189544439	esv3588247	218478	NONE	0	0	0.0268	0	0.839316516	-0.071549759	0.412228661	0.230978138	NO	NO	NO	NO
1	189335550	189464463	esv3588252	128913	NONE	0	0	0.0188	0	0.943600593	0.096391107	0.620705881	0.661463281	NO	NO	NO	NO
1	189416435	189436930	esv3588256	20495	NONE	0.0166	0	0.0268	0.001	1.211594326	-0.530170349	0.137296283	-0.675765962	NO	NO	NO	NO
1	189530165	189530735	esv3588262	570	NONE	0.1029	0	0	0	3.618217244	3.090859709	4.494633367	-0.778730332	NO	NO	NO	NO
1	189578512	189580756	esv3588270	2244	NONE	0	0	0	0.0041	0.773628095	-0.283651703	0.488791052	0.074770797	NO	NO	NO	NO
1	189704477	189783356	esv3588274	78879	NONE	0	0.001	0	0	0.994554492	0.184177665	0.725609346	0.410324736	NO	NO	NO	NO
1	189771446	189777754	esv3588275	6308	NONE	0.0242	0.001	0	0	0.843884459	-0.135831777	0.741589177	0.18846059	NO	NO	NO	NO
1	189785833	189787567	esv3588277	1734	NONE	0.0008	0	0	0	0.659704284	-1.945382554	0.572060448	-0.945103183	NO	NO	NO	NO
1	189795865	189798982	esv3588278	3117	NONE	0.0008	0	0	0	0.378790032	1.407311079	0.451834747	0.576156008	NO	NO	NO	NO
1	189853331	189854117	esv3588281	786	NONE	0.0817	0	0	0	2.582413646	1.262748925	1.715266627	2.595964443	NO	NO	NO	NO
1	189887864	189891779	esv3588285	3915	NONE	0	0	0	0.0112	-14.29037341	-13.0295368	-14.12178167	-0.1646594	YES	YES	YES	NO
1	189960198	189965063	esv3588289	4865	NONE	0	0	0	0.001	0.432387911	1.498493864	0.391315366	-0.526159739	NO	NO	NO	NO
1	190049113	190052964	esv3588294	3851	NONE	0.0008	0	0	0	0.794797179	-0.329623634	0.898926885	0.385197986	NO	NO	NO	NO
1	190052658	190053873	esv3588295	1215	NONE	0.1256	0	0.0069	0.001	-1.060345022	0.227868278	-0.853242621	0.309539819	NO	NO	NO	NO
1	190197499	190201762	esv3588296	4263	NONE	0.0038	0	0	0	1.582704025	-0.537720659	-0.117678441	-0.06816254	NO	NO	NO	NO
1	190248809	190281663	esv3588297	32854	BRINP3:1	0.003	0	0	0	1.178518619	0.048797512	0.530833175	-0.074869236	NO	NO	NO	NO
1	190252722	190304792	esv3588298	52070	NONE	0.0023	0	0	0	0.981857288	-0.148019743	0.337367925	-0.303432709	NO	NO	NO	NO
1	190276843	190283574	esv3588299	6731	NONE	0.0023	0	0.001	0	1.183537258	-0.382443932	0.859668317	-0.249727063	NO	NO	NO	NO
1	190291168	190292320	esv3588300	1152	NONE	0	0	0	0.001	1.495532754	-0.828135055	0.738237829	0.626436667	NO	NO	NO	NO
1	190309695	190311548	esv3588301	1853	NONE	0	0	0.0159	0	0.552432376	-0.442547517	-0.626465004	1.973205517	NO	NO	NO	NO
1	190326022	190327147	esv3588302	1125	NONE	0.0121	0	0	0	2.72998442	3.118108818	2.096732349	6.059563564	NO	NO	NO	NO
1	190368351	190370953	esv3588303	2602	NONE	0.0061	0	0	0	1.082064209	-0.415290093	0.057711115	0.911050328	NO	NO	NO	NO
1	190715349	190716495	esv3588309	1146	NONE	0.0038	0	0	0	2.157627001	0.270946532	1.827014176	0.976435497	NO	NO	NO	NO
1	190747327	190773526	esv3588310	26199	LINC01720:3	0	0	0.001	0	0.652450374	-0.365954584	0.066404027	-0.477749087	NO	NO	NO	NO
1	190873152	190876100	esv3588312	2948	NONE	0.0023	0	0	0	0.705527421	-1.476987769	-0.414433334	-0.109115976	NO	NO	NO	NO
1	191006787	191010247	esv3588314	3460	NONE	0.0015	0	0	0	2.802320196	3.889539263	4.441112186	7.979900025	NO	NO	NO	NO
1	191011307	191088350	esv3588315	77043	NONE	0	0.001	0	0	0.946799538	-0.041197231	0.540949937	0.569095704	NO	NO	NO	NO
1	191197533	191201029	esv3588318	3496	LINC01680:1	0.0008	0	0.001	0	-0.70989506	0.194968699	0.179284827	-1.288368806	NO	NO	NO	NO
1	191199622	191354901	esv3588319	155279	NONE	0	0	0.001	0	0.600030939	-0.156049597	0.064172512	-0.35490892	NO	NO	NO	NO
1	191203621	191205508	esv3588320	1887	NONE	0	0.001	0	0	-2.421535579	-0.479309215	-1.81790251	-0.749003051	NO	NO	NO	NO
1	191208325	191241348	esv3588321	33023	NONE	0	0	0.001	0	0.602669172	-0.031181671	0.170887884	-0.404698041	NO	NO	NO	NO
1	191467534	191473257	esv3588325	5723	NONE	0.0008	0	0	0.002	1.161164641	-0.064313412	0.632439127	0.245318517	NO	NO	NO	NO
1	191492051	191514306	esv3588327	22255	NONE	0	0	0.001	0	0.144905735	-0.599891642	0.016149299	-0.648500663	NO	NO	NO	NO
1	191656011	191703090	esv3588331	47079	NONE	0.0008	0	0	0	-0.128270066	-0.826131675	-0.550733506	-0.735495325	NO	NO	NO	NO
1	191657100	191661115	esv3588332	4015	NONE	0.0015	0.0139	0	0	0.478423383	-1.266884604	-0.418246514	-1.054832835	NO	NO	NO	NO
1	191675118	191675670	esv3588333	552	NONE	0	0	0.001	0	2.840386108	2.58195836	5.823500749	-0.168997945	NO	NO	NO	NO
1	191716928	191726581	esv3588334	9653	NONE	0.0265	0	0	0	0.8584327	0.146849601	0.113485712	-0.619891245	NO	NO	NO	NO
1	191762054	191885162	esv3588335	123108	NONE	0.0015	0	0	0	0.355737244	-0.547327032	-0.039504392	-0.353794923	NO	NO	NO	NO
1	191763799	191779355	esv3588336	15556	NONE	0.0008	0	0	0	1.36653614	0.221180524	0.936471784	0.4049056	NO	NO	NO	NO
1	191781906	191793102	esv3588338	11196	NONE	0.0008	0	0.001	0	0.156619429	-0.950507382	-0.245186917	0.023634295	NO	NO	NO	NO
1	191797492	191825478	esv3588339	27986	NONE	0.0008	0	0.001	0	0.534764077	-0.187427318	0.38995439	0.249054049	NO	NO	NO	NO
1	191827807	191868768	esv3588341	40961	NONE	0.0386	0	0	0	0.438188235	-0.657798592	-0.148217239	-0.795490191	NO	NO	NO	NO
1	191856208	191885798	esv3588342	29590	NONE	0.003	0	0	0	0.118862996	-0.704819237	-0.466791052	-0.538601412	NO	NO	NO	NO
1	191860751	191865859	esv3588343	5108	NONE	0.0393	0.002	0	0	1.010302042	-0.583754548	1.245494356	-0.368740609	NO	NO	NO	NO
1	191867769	191868893	esv3588344	1124	NONE	0.003	0	0.001	0.001	1.270770951	0.174098655	0.49209701	1.804546979	NO	NO	NO	NO
1	191916438	191918546	esv3588345	2108	NONE	0.441	0.0696	0.1429	0.1748	2.028144771	1.867716903	2.440921176	4.320388842	NO	NO	NO	NO
1	192026804	192057495	esv3588347	30691	NONE	0	0.001	0	0	0.381391066	-0.480484257	-0.03648769	-0.472539211	NO	NO	NO	NO
1	192079613	192084442	esv3588349	4829	NONE	0	0	0	0.001	-0.352645635	-0.699913114	0.321920319	-0.202337847	NO	NO	NO	NO
1	192090894	192092030	esv3588350	1136	NONE	0.0038	0.0398	0	0.0879	1.217928239	0.351120521	0.773838468	2.144079731	NO	NO	NO	NO
1	192207173	192220763	esv3588351	13590	NONE	0	0	0.001	0	0.559088421	0.289746426	0.956458391	0.447784853	NO	NO	NO	NO
1	192218070	192219758	esv3588352	1688	NONE	0	0.001	0	0	0.71209972	0.177224339	0.856942418	1.387670444	NO	NO	NO	NO
1	192539160	192540169	esv3588357	1009	NONE	0.0083	0	0	0	-0.548419928	0.739307489	-0.358768027	2.006315652	NO	NO	NO	NO
1	192675005	192683628	esv3588359	8623	NONE	0.0068	0	0	0	-0.496446382	0.880972259	-0.686658888	-0.453774079	NO	NO	NO	NO
1	192788713	192799729	esv3588361	11016	NONE	0.0008	0	0	0	1.027569848	1.341343034	0.358264988	1.09882666	NO	NO	NO	NO
1	192860399	192861923	esv3588362	1524	NONE	0.2572	0	0	0	-2.221246908	-0.815106026	-3.124699159	-4.359622113	NO	NO	NO	NO
1	192873589	192896066	esv3588363	22477	NONE	0	0.001	0	0	-0.459099809	0.419921408	-0.437803726	0.285023183	NO	NO	NO	NO
1	193074593	193077050	esv3588364	2457	GLRX2:3	0	0	0	0.0072	-0.540694701	1.202341271	-1.026821261	-0.837438212	NO	NO	NO	NO
1	193465845	193466753	esv3588366	908	NONE	0.0219	0	0	0	-0.135182883	0.922771289	1.617902975	0.556873945	NO	NO	NO	NO
1	193512331	193515875	esv3588367	3544	NONE	0	0	0	0.001	0.652134825	0.164676952	0.273997597	-0.087562656	NO	NO	NO	NO
1	193531543	193534412	esv3588368	2869	NONE	0.0083	0	0	0	-1.591587403	-1.393923703	-0.069497019	-3.137103028	NO	NO	NO	NO
1	193537875	193538952	esv3588369	1077	NONE	0.0023	0	0	0	2.385323812	0.437538933	3.437422619	2.733276457	NO	NO	NO	NO
1	193646553	193654283	esv3588372	7730	NONE	0	0	0	0	-0.049047851	-1.071735759	-0.294401788	-0.505734891	NO	NO	NO	NO
1	193661438	193711929	esv3588374	50491	NONE	0.0015	0	0	0	0.979757976	-0.18301994	0.561243805	2.161075116	NO	NO	NO	NO
1	193868336	193869255	esv3588376	919	NONE	0.0061	0	0	0	0.915520716	0.755250652	1.716640888	1.755865814	NO	NO	NO	NO
1	193895679	193907897	esv3588379	12218	NONE	0	0	0	0.0031	0.021032602	-0.530892763	-0.708146036	-0.177719339	NO	NO	NO	NO
1	193926831	193934057	esv3588380	7226	NONE	0	0	0.001	0	0.844921131	0.310498219	0.94550946	1.948667496	NO	NO	NO	NO
1	193968439	193969686	esv3588381	1247	NONE	0	0	0	0.001	0.293709737	0.837697868	0.55562526	1.729678021	NO	NO	NO	NO
1	193999047	194000246	esv3588382	1199	NONE	0.0174	0.005	0.0893	0.0327	1.729633282	1.730212037	2.608913918	1.208524071	NO	NO	NO	NO
1	194361239	194362804	esv3588390	1565	NONE	0	0	0	0.0061	1.317283478	0.893796398	0.137270492	0.160033057	NO	NO	NO	NO
1	194367496	194369537	esv3588391	2041	NONE	0	0	0	0	1.550302701	-0.505953533	0.198618012	-1.553524778	NO	NO	NO	NO
1	194428681	194448408	esv3588392	19727	NONE	0	0	0	0.0123	0.737525365	-0.755847886	0.02779657	-0.835466601	NO	NO	NO	NO
1	194451056	194454312	esv3588393	3256	NONE	0.4818	0.6481	0.6895	0.3691	2.23890984	3.469171625	2.783727969	3.842558913	NO	NO	NO	NO
1	194481169	194506491	esv3588394	25322	NONE	0	0.001	0	0	0.243286575	-0.512201118	0.080858728	-0.281768659	NO	NO	NO	NO
1	194517604	194517863	esv3588396	259	NONE	0.1679	0.7157	0.7083	0.546	4.154591731	-0.969965342	1.1330438	4.037695901	NO	NO	NO	NO
1	194575585	194578066	esv3588398	2481	NONE	0	0.001	0.001	0	2.300926996	3.335059295	1.833263727	6.330495817	NO	NO	NO	NO
1	194622395	194622981	esv3588401	586	NONE	0.0008	0	0	0	2.558584945	-0.097362167	2.064408603	0.214995717	NO	NO	NO	NO
1	194647204	194659758	esv3588402	12554	NONE	0	0	0	0	0.809518081	-0.520711827	0.15116164	-0.282533236	NO	NO	NO	NO
1	194759375	194760552	esv3588404	1177	NONE	0.0136	0.001	0	0	2.924312227	1.682996079	2.135890842	1.663258116	NO	NO	NO	NO
1	194802568	194807934	esv3588408	5366	NONE	0.0083	0	0	0	0.214340462	-1.050034521	-0.619323502	-1.563764974	NO	NO	NO	NO
1	194818491	194826583	esv3588409	8092	NONE	0	0	0.003	0	0.605087057	0.268064196	-0.229407492	-1.205886025	NO	NO	NO	NO
1	194925572	194932468	esv3588413	6896	NONE	0.0008	0	0	0	1.473835719	-0.050317141	0.854463667	-1.12812565	NO	NO	NO	NO
1	194936107	194946169	esv3588415	10062	NONE	0.0136	0	0	0	0.961782637	-0.207372655	0.488720709	-0.347068127	NO	NO	NO	NO
1	194964942	194969782	esv3588421	4840	NONE	0.0008	0	0	0	1.666034208	-0.618632577	0.623914572	-1.090555298	NO	NO	NO	NO
1	194973066	194975300	esv3588422	2234	NONE	0	0	0	0.0123	-1.713484299	-0.406538073	-1.252486085	0.754165534	NO	NO	NO	NO
1	194982068	194983213	esv3588423	1145	NONE	0.0008	0	0	0	-1.543035497	0.282600474	-0.23970708	0.504382947	NO	NO	NO	NO
1	195013816	195019755	esv3588425	5939	NONE	0	0	0.0099	0	1.342895529	-0.31988797	0.237924294	-0.397771645	NO	NO	NO	NO
1	195062655	195066398	esv3588426	3743	NONE	0.0008	0	0	0	-0.668637594	-1.133255211	-1.361758938	-1.974815167	NO	NO	NO	NO
1	195236301	195241676	esv3588430	5375	NONE	0.0008	0	0	0	1.125062531	0.230187152	1.02009434	-0.557579112	NO	NO	NO	NO
1	195289388	195291412	esv3588431	2024	NONE	0	0	0	0.002	1.075301621	0.332107699	0.695550321	-0.116207262	NO	NO	NO	NO
1	195342608	195409552	esv3588435	66944	NONE	0	0	0	0	0.282970057	-0.472203408	0.004834019	-0.615650305	NO	NO	NO	NO
1	195359320	195365491	esv3588436	6171	NONE	0.0083	0	0	0	0.055943192	-0.099171969	0.381550162	-0.004768107	NO	NO	NO	NO
1	195393895	195402273	esv3588437	8378	NONE	0	0.001	0	0	0.76293571	-0.521056176	0.474661444	-0.303983431	NO	NO	NO	NO
1	195409339	195416415	esv3588441	7076	NONE	0.034	0	0	0	0.901599319	-0.264849404	-0.388869387	-0.711534865	NO	NO	NO	NO
1	195450774	196025651	esv3588444	574877	LINC01724:1	0.0008	0	0	0	0.583384693	-0.239307261	0.079300563	-0.229152139	NO	NO	NO	NO
1	195456421	195679863	esv3588445	223442	NONE	0.0008	0	0	0	0.788232993	0.029009262	0.341918208	-0.125626643	NO	NO	NO	NO
1	195526129	195531476	esv3588446	5347	NONE	0.0023	0	0.002	0	1.592476185	1.908055083	1.619606819	3.228332283	NO	NO	NO	NO
1	195686623	195782865	esv3588448	96242	NONE	0.0008	0	0	0	0.477621797	-0.452674781	-0.134897199	-0.678784134	NO	NO	NO	NO
1	195739588	195747134	esv3588449	7546	NONE	0.0008	0	0	0	1.217825124	-0.824012592	0.303331534	-0.722799912	NO	NO	NO	NO
1	195826934	195875443	esv3588452	48509	NONE	0.0008	0.002	0	0.0031	0.493178076	-0.356265037	-0.112660354	-0.524764803	NO	NO	NO	NO
1	195885406	195888240	esv3588453	2834	NONE	0.0008	0	0	0.002	-0.132907179	-0.166026836	-0.537179585	-0.051075779	NO	NO	NO	NO
1	195904499	195906947	esv3588456	2448	NONE	0.0008	0	0.002	0	0.292871221	-0.233313047	0.562519163	0.360461551	NO	NO	NO	NO
1	195911251	196026922	esv3588457	115671	LINC01724:1	0.0008	0	0	0	0.172648583	-0.52954444	-0.229399574	-0.391042414	NO	NO	NO	NO
1	196004609	196013402	esv3588458	8793	NONE	0.0015	0	0	0	1.130749654	0.73404122	0.692845108	-0.33854141	NO	NO	NO	NO
1	196013175	196015027	esv3588459	1852	LINC01724:1	0.0008	0	0.001	0	2.797802575	0.730772783	1.489136615	-0.481608862	NO	NO	NO	NO
1	196232626	196233221	esv3588462	595	NONE	0	0	0.001	0	1.743856233	0.489496118	2.263321368	2.072055267	NO	NO	NO	NO
1	196490721	196491670	esv3588464	949	NONE	0	0	0	0.001	1.535100253	0.273478268	2.259570923	1.295748808	NO	NO	NO	NO
1	196560209	196562684	esv3588465	2475	NONE	0	0	0	0.002	0.488921549	-1.057986077	0.094001591	-0.114975479	NO	NO	NO	NO
1	196602664	196604033	esv3588466	1369	NONE	0.0129	0.005	0.0466	0.0982	1.224085617	0.959506725	-0.058207986	-0.21873263	NO	NO	NO	NO
1	196631002	196633220	esv3588467	2218	NONE	0.0008	0	0	0	0.18852605	0.238682776	-0.681710861	-1.394144025	NO	NO	NO	NO
1	196652962	196654502	esv3588468	1540	CFH:1	0	0	0.001	0	1.717126893	-0.254796866	1.336874985	1.025202717	NO	NO	NO	NO
1	196728877	196808865	esv3588469	79988	CFHR1:6|CFHR3:6	0.4486	0.1889	0.0476	0.3548	0.496917231	-8.825856288	0.030976976	0.707652894	NO	YES	NO	NO
1	196734744	196744476	esv3588470	9732	CFHR3:1	0.4486	0.1889	0.0476	0.3558	1.390573543	-11.36875443	0.833722248	0.120455778	NO	YES	NO	NO
1	196772365	196774588	esv3588475	2223	NONE	0.3759	0.1223	0.0714	0.2628	-10.30701756	-9.480888432	-10.23846011	-1.579011437	YES	YES	YES	NO
1	196782355	196903873	esv3588478	121518	CFHR4:11|CFHR1:6	0.0325	0.0139	0.0288	0.0082	0.721926264	-3.103486512	0.18169361	1.217652834	NO	NO	NO	NO
1	196852281	196858335	esv3588481	6054	CFHR4:1	0.0303	0.008	0.0278	0.0072	0.796059399	0.008118556	0.521205115	-0.548408088	NO	NO	NO	NO
1	196856323	196857256	esv3588482	933	CFHR4:1	0.0015	0	0	0	1.296461338	0.388848866	1.761561099	0.921910483	NO	NO	NO	NO
1	196939175	196952302	esv3588486	13127	CFHR5:2	0	0	0	0.0102	0.876079329	-0.394187896	-0.069347657	-0.238261838	NO	NO	NO	NO
1	196956286	196977060	esv3588489	20774	CFHR5:6	0.0038	0	0	0	0.824531804	0.103759248	1.134605867	0.755536562	NO	NO	NO	NO
1	197115894	197185635	esv3588492	69741	ZBTB41:12|CRB1:1	0.0008	0	0	0	0.279708525	0.443127259	-0.402507507	-0.491351634	NO	NO	NO	NO
1	197126675	197316656	esv3588493	189981	ZBTB41:12|CRB1:8	0.0008	0	0	0	0.315379599	0.016611232	-0.121872885	-0.190049571	NO	NO	NO	NO
1	197229896	197233856	esv3588494	3960	NONE	0.0008	0.001	0	0	0.969760487	0.613949456	1.126784976	0.607465016	NO	NO	NO	NO
1	197232585	197235905	esv3588495	3320	NONE	0.0008	0	0	0.002	0.469043004	0.349682884	0.931479505	-0.36034827	NO	NO	NO	NO
1	197268844	197269752	esv3588496	908	NONE	0.0174	0	0	0	-0.358273401	0.666185513	1.763670272	0.821641312	NO	NO	NO	NO
1	197311827	197442888	esv3588497	131061	CRB1:14	0.0015	0	0	0	-0.063748379	-0.54817875	-0.446227281	-0.314584382	NO	NO	NO	NO
1	197319751	197429680	esv3588498	109929	CRB1:12	0.0008	0	0	0	-0.04664896	-0.533485857	-0.43800811	-0.381872559	NO	NO	NO	NO
1	197330214	197334114	esv3588499	3900	NONE	0.0008	0	0	0	0.735171754	1.45991477	-0.147675377	-1.826665995	NO	NO	NO	NO
1	197573097	197614547	esv3588502	41450	DENND1B:4	0.0008	0	0	0	1.366728346	0.86458746	0.881076543	0.940638647	NO	NO	NO	NO
1	197631826	197717434	esv3588503	85608	DENND1B:5	0.0008	0	0	0	1.09689421	0.051859514	0.213150849	0.798383549	NO	NO	NO	NO
1	197663304	197734788	esv3588504	71484	DENND1B:3	0.0008	0	0	0	1.125594433	0.440078443	0.341966042	1.012015237	NO	NO	NO	NO
1	197720697	197722847	esv3588506	2150	NONE	0.0121	0	0	0	0.994871998	2.462459531	2.623765123	1.283691156	NO	NO	NO	NO
1	197894025	197894310	esv3588508	285	NONE	0.5272	0.4006	0.6944	0.5869	1.744399211	1.938965544	3.681916753	-3.028169114	NO	NO	NO	NO
1	197907928	197909912	esv3588509	1984	NONE	0.0008	0.001	0	0	0.43276567	0.292781727	-0.004860275	0.395308911	NO	NO	NO	NO
1	198003599	198007023	esv3588510	3424	NONE	0.0008	0.0139	0	0.0051	0.165761867	-0.10749581	-0.185201025	3.002621262	NO	NO	NO	NO
1	198017243	198019189	esv3588511	1946	NONE	0	0.001	0	0	1.348411795	0.074885116	0.884422311	0.124484071	NO	NO	NO	NO
1	198043979	198225783	esv3588513	181804	NEK7:3	0.0008	0	0	0	0.154626721	0.36045357	-0.067916452	0.277196628	NO	NO	NO	NO
1	198236233	198304138	esv3588517	67905	NEK7:5	0.0008	0	0	0	0.80959548	0.522862217	0.383219302	0.635647159	NO	NO	NO	NO
1	198261283	198273580	esv3588519	12297	NEK7:2	0.0008	0	0	0	1.217284935	0.532187747	0.351486609	-0.581925018	NO	NO	NO	NO
1	198285722	198738212	esv3588521	452490	PTPRC:36|ATP6V1G3:7|NEK7:1	0	0	0	0	0.239831804	-0.305985581	-0.061986439	-0.330931431	NO	NO	NO	NO
1	198304656	198310281	esv3588522	5625	NONE	0.1225	0.0437	0.1776	0.0879	0.032375674	-0.827958555	-0.94453062	-0.109147388	NO	NO	NO	NO
1	198309489	198320894	esv3588523	11405	NONE	0.0008	0	0	0	-0.22612799	-0.648955919	-0.674950784	-0.122931652	NO	NO	NO	NO
1	198374566	198411050	esv3588524	36484	NONE	0.0008	0	0	0	0.329335732	-0.255915702	-0.194535409	-0.188829901	NO	NO	NO	NO
1	198404384	198447571	esv3588525	43187	NONE	0.0008	0	0	0	0.507884552	0.081365985	0.323631341	0.15189703	NO	NO	NO	NO
1	198444762	198464811	esv3588526	20049	NONE	0.0008	0	0	0	-0.360069949	-0.477224944	-0.321156877	-0.463365444	NO	NO	NO	NO
1	198534282	198538386	esv3588531	4104	NONE	0	0	0.001	0	1.029153535	1.583901393	1.975856878	0.205399135	NO	NO	NO	NO
1	198594702	198601219	esv3588532	6517	NONE	0.0008	0	0	0	0.171801148	-0.68721882	-0.595592553	0.363204151	NO	NO	NO	NO
1	198757296	198761875	esv3588534	4579	NONE	0	0	0.001	0	-0.679579732	-0.764462683	0.377575762	0.552498739	NO	NO	NO	NO
1	198773749	198775415	esv3588535	1666	NONE	0.0499	0.2664	0.5188	0.4151	1.387933973	0.593743365	0.142118463	0.027763007	NO	NO	NO	NO
1	198886122	198886827	esv3588538	705	NONE	0.0318	0	0	0	-0.002939541	1.9784952	0.680546889	2.062980895	NO	NO	NO	NO
1	199110049	199113807	esv3588540	3758	NONE	0.4781	0.165	0.003	0.0869	0.917840199	-0.493322988	0.753035114	-0.253444776	NO	NO	NO	NO
1	199124821	199151595	esv3588541	26774	LINC02789:2	0.0008	0	0	0	0.181784511	-0.100923312	0.270478297	-0.112075534	NO	NO	NO	NO
1	199540885	199545852	esv3588547	4967	NONE	0.0008	0.002	0	0	-0.33344791	-0.702542771	0.038424657	0.149497162	NO	NO	NO	NO
1	199564008	199566657	esv3588548	2649	NONE	0.0008	0.0268	0	0.001	0.472380667	0.527471222	1.353689432	-0.237228258	NO	NO	NO	NO
1	199725907	199727182	esv3588549	1275	NONE	0	0.001	0	0	0.994871998	0.731553141	1.684955931	2.583849847	NO	NO	NO	NO
1	199982258	199994923	esv3588551	12665	NONE	0	0	0	0.001	-0.265177967	0.645261198	0.521805411	0.011137495	NO	NO	NO	NO
1	200063800	200064850	esv3588552	1050	NONE	0.0061	0	0.002	0	-1.214940992	0.280662608	-0.71007017	2.464880054	NO	NO	NO	NO
1	200125026	200139326	esv3588554	14300	NONE	0	0	0	0.001	-0.093293489	0.129870675	0.083717465	0.158994629	NO	NO	NO	NO
1	200189992	200190689	esv3588555	697	NONE	0	0.006	0	0.002	2.17111392	2.060088492	3.130055687	1.677861752	NO	NO	NO	NO
1	200219764	200221345	esv3588557	1581	NONE	0.0023	0	0	0	-0.776053403	0.846227847	-0.154308346	-0.342821536	NO	NO	NO	NO
1	200393086	200398322	esv3588558	5236	NONE	0	0.001	0	0	-0.314302925	1.157741775	-0.756160773	-1.792422348	NO	NO	NO	NO
1	200601154	200607231	esv3588561	6077	NONE	0	0.001	0	0	0.656448551	0.711428778	0.285812478	0.105225633	NO	NO	NO	NO
1	200652479	200655394	esv3588562	2915	NONE	0.0015	0	0	0	-0.007061507	1.393515964	0.093497087	1.182294129	NO	NO	NO	NO
1	200899318	200907205	esv3588566	7887	MROH3P:2	0	0	0	0	-1.090352406	-0.668813505	-0.902603399	0.884551677	NO	NO	NO	NO
1	200980825	200985484	esv3588567	4659	NONE	0	0.001	0	0	-2.853209734	-1.903201931	-2.813012989	-1.829669435	NO	NO	NO	NO
1	201152824	201154253	esv3588568	1429	NONE	0.0008	0	0	0	-2.231444658	-1.067364074	-2.180156263	-1.475973712	NO	NO	NO	NO
1	201276331	201281506	esv3588569	5175	NONE	0	0.001	0	0	-2.752202203	-2.116520466	-2.842027044	-2.218860161	NO	NO	NO	NO
1	201379336	201391175	esv3588570	11839	TNNI1:7	0	0	0	0.001	-1.915023087	-2.399633161	-3.048872928	-1.786835731	NO	NO	NO	NO
1	201391576	201392430	esv3588571	854	NONE	0	0	0.001	0	-1.061409879	-2.135608791	-1.062918062	-0.709916997	NO	NO	NO	NO
1	201527710	201528635	esv3588572	925	NONE	0.0008	0	0	0	-0.816776489	0.001533789	-0.032104033	0.145363438	NO	NO	NO	NO
1	201555926	201559281	esv3588573	3355	NONE	0.0008	0	0.001	0	0.466844155	1.731080794	0.872273924	0.945015277	NO	NO	NO	NO
1	201694484	201698394	esv3588574	3910	NONE	0	0	0.001	0	-1.220592688	0.745637021	0.036421005	-0.642095624	NO	NO	NO	NO
1	201810530	201815504	esv3588575	4974	NONE	0	0	0.001	0	0.08352036	0.766139258	-0.540414252	-0.836730035	NO	NO	NO	NO
1	202137568	202145992	esv3588576	8424	PTPRVP:6	0	0.001	0	0	-2.837586595	-2.512992658	-3.796597661	-3.143625084	NO	NO	NO	NO
1	202178617	202180847	esv3588577	2230	NONE	0	0.002	0	0	-1.343764171	-0.77322617	-2.713085273	-1.024289863	NO	NO	NO	NO
1	202293086	202294345	esv3588579	1259	NONE	0	0.001	0	0	0.767279397	0.671465818	0.730389699	0.318183744	NO	NO	NO	NO
1	202295105	202297677	esv3588580	2572	NONE	0.0189	0	0	0	-0.748405824	0.761702316	-0.496459602	0.556873945	NO	NO	NO	NO
1	202301683	202310795	esv3588581	9112	UBE2T:6	0.0015	0.001	0	0.001	-0.324985212	0.262302013	-0.453058061	-1.158070089	NO	NO	NO	NO
1	202551042	202555068	esv3588583	4026	PPP1R12B:2	0	0	0	0	-0.696793088	-0.036548731	-0.044952129	0.029399826	NO	NO	NO	NO
1	202583414	202586445	esv3588584	3031	NONE	0	0.002	0	0	-1.538891362	-1.668744275	-2.342076531	-0.89065494	NO	NO	NO	NO
1	202762275	202763927	esv3588586	1652	NONE	0	0	0.001	0	1.355148208	0.901873922	-0.217070819	0.53261963	NO	NO	NO	NO
1	203064255	203065189	esv3588590	934	NONE	0.0008	0.0119	0	0.0307	1.83163559	1.984477975	2.382166843	1.715160309	NO	NO	NO	NO
1	203165333	203168937	esv3588593	3604	NONE	0.0038	0	0	0	-1.372726381	-1.80698966	-1.867448102	-0.654953465	NO	NO	NO	NO
1	203165468	203166858	esv3588594	1390	NONE	0.0363	0	0	0	-0.629367046	-1.507627973	-1.581112416	-0.480861752	NO	NO	NO	NO
1	203543464	203549392	esv3588595	5928	NONE	0	0.001	0	0	-0.997985668	-0.496304501	-1.839644195	-0.653010496	NO	NO	NO	NO
1	203555921	203566174	esv3588596	10253	NONE	0	0	0	0.0031	-1.136201272	-0.031826169	-1.363004838	-0.633094364	NO	NO	NO	NO
1	203684252	203686389	esv3588598	2137	NONE	0.143	0.1759	0.2034	0.2935	-1.125666064	-0.82271493	-1.470051361	-15.10850799	NO	NO	NO	YES
1	203749617	203756134	esv3588599	6517	NONE	0	0	0.001	0	-0.277485673	0.274769348	-0.661598276	0.516910336	NO	NO	NO	NO
1	203779476	203780565	esv3588602	1089	NONE	0.0008	0	0	0	0.998930424	2.719792762	-0.706944864	-1.11723059	NO	NO	NO	NO
1	203786422	203787480	esv3588603	1058	NONE	0.0008	0.0189	0	0.0051	1.278234912	2.301693849	1.596134324	-0.768631245	NO	NO	NO	NO
1	203790503	203793507	esv3588604	3004	NONE	0	0	0.001	0	-0.245634429	0.365618929	-0.858636817	0.743609562	NO	NO	NO	NO
1	203826961	203831121	esv3588605	4160	SNRPE:3	0	0	0	0	-1.516842527	1.096392835	-1.72577456	0.316079904	NO	NO	NO	NO
1	203859252	203862035	esv3588606	2783	NONE	0.0008	0	0	0.0031	0.705576801	2.444969567	1.056701501	1.024791361	NO	NO	NO	NO
1	203887673	203889898	esv3588607	2225	NONE	0.1921	0.005	0	0	3.304002426	1.68178294	2.05674443	-1.397010065	NO	NO	NO	NO
1	203894270	203895883	esv3588608	1613	NONE	0.1944	0.005	0	0	-0.545466753	0.583221381	1.290265445	-14.60840338	NO	NO	NO	YES
1	203907439	203922055	esv3588609	14616	NONE	0	0.004	0	0	-0.321047245	-0.149776915	0.162075035	-0.051714211	NO	NO	NO	NO
1	203935832	203945458	esv3588611	9626	NONE	0.0023	0.003	0	0	-0.22152759	0.452364841	-0.16262048	0.144787439	NO	NO	NO	NO
1	204131231	204135846	esv3588613	4615	REN:2	0.0008	0	0	0	-1.944362832	-1.397433323	-3.041454705	-0.880022097	NO	NO	NO	NO
1	204315382	204316847	esv3588617	1465	NONE	0	0	0.0109	0	-0.307384121	1.167654269	2.086995071	4.591037033	NO	NO	NO	NO
1	204381864	204384631	esv3588619	2767	NONE	0.1989	0.004	0.0764	0.0337	0.061271931	1.110963977	-0.852159958	0.506191455	NO	NO	NO	NO
1	204570140	204572391	esv3588623	2251	NONE	0	0	0	0.001	-1.384448341	-1.254928074	-1.835344364	-0.840437504	NO	NO	NO	NO
1	205106089	205108223	esv3588629	2134	NONE	0.0333	0	0	0	-0.382032722	1.487185667	0.082906397	1.326692717	NO	NO	NO	NO
1	205249993	205252304	esv3588633	2311	NONE	0.0008	0	0	0	0.443135912	1.572628438	1.365948207	2.073949334	NO	NO	NO	NO
1	205251509	205252489	esv3588634	980	NONE	0.0318	0	0	0	-0.155132721	2.20703308	1.333805488	2.192307753	NO	NO	NO	NO
1	205471118	205481086	esv3588637	9968	CDK18:2	0.0008	0	0	0	-2.45818249	-1.771014302	-2.3437708	-2.071994024	NO	NO	NO	NO
1	205507728	205518761	esv3588638	11033	NONE	0	0	0.001	0	-1.588417347	-0.134075506	-1.196708553	-1.297089574	NO	NO	NO	NO
1	205572692	205576704	esv3588640	4012	NONE	0.0008	0	0	0	-0.818547984	1.355127507	-0.308972106	0.816537787	NO	NO	NO	NO
1	205616161	205617135	esv3588641	974	NONE	0.1271	0	0	0	-0.728661132	-0.003849659	0.036612154	-0.759532735	NO	NO	NO	NO
1	205660393	205675078	esv3588642	14685	NONE	0.0015	0	0	0	-1.375704825	0.618817176	-0.730092027	-0.991553894	NO	NO	NO	NO
1	206236368	206237056	esv3588648	688	NONE	0	0	0.001	0	0.327859647	2.35040261	2.250549993	1.255736647	NO	NO	NO	NO
1	206260414	206323764	esv3588649	63350	CTSE:4|RHEX:1	0	0	0.001	0	-0.925996752	-0.771037264	-1.026946261	-0.886464158	NO	NO	NO	NO
1	206281075	206283144	esv3588651	2069	NONE	0	0.001	0.0079	0	-0.348745567	-1.310705351	-1.483544615	-7.160452845	NO	NO	NO	YES
1	206286074	206292194	esv3588652	6120	RHEX:1	0	0	0.0129	0.0153	0.252249659	-0.517097219	-0.567487025	0.334273232	NO	NO	NO	NO
1	206316086	206332140	esv3588654	16054	CTSE:9	0.0008	0.0089	0	0.001	-1.175802865	-1.559314032	-1.28701026	-0.868247599	NO	NO	NO	NO
1	206792772	206793748	esv3588656	976	NONE	0.0144	0	0	0	0.129965684	1.37992225	-1.145253542	1.254781917	NO	NO	NO	NO
1	206814657	206815704	esv3588657	1047	NONE	0.0953	0.006	0.1508	0.0235	3.642285651	5.012102911	4.796033797	8.153362452	NO	NO	NO	NO
1	206919011	206920649	esv3588658	1638	NONE	0.0008	0	0	0	-0.982897137	-0.116559172	-0.986419336	-0.690668512	NO	NO	NO	NO
1	207040555	207045251	esv3588662	4696	IL20:2	0.0091	0.001	0	0	-1.058553744	-0.629121632	-0.443574394	0.369161248	NO	NO	NO	NO
1	207214581	207216659	esv3588665	2078	NONE	0	0.001	0	0	-0.082030771	2.052835302	1.805338113	2.350105865	NO	NO	NO	NO
1	207292375	207292595	esv3588666	220	NONE	0.3396	0.6282	0.7351	0.7505	2.350893606	-0.749913503	3.249171543	5.474326054	NO	NO	NO	NO
1	207292405	207293149	esv3588667	744	NONE	0.3351	0.6332	0.7361	0.7515	0.550335245	-1.258709438	0.61222618	1.849394212	NO	NO	NO	NO
1	207322003	207347292	esv3588668	25289	NONE	0.0015	0	0	0	0.456188757	0.257955505	0.396507444	-0.358122461	NO	NO	NO	NO
1	207376008	207376589	esv3588669	581	NONE	0	0	0.0069	0	0.232911237	-2.245868323	0.438843746	2.66027827	NO	NO	NO	NO
1	207841060	207845817	esv3588675	4757	NONE	0.121	0.003	0	0.001	-0.827979836	-1.082547045	-0.557345289	-1.081396174	NO	NO	NO	NO
1	207950005	207951782	esv3588676	1777	NONE	0	0.003	0	0	1.298716103	2.529100369	2.896053305	1.267141835	NO	NO	NO	NO
1	208016157	208021107	esv3588677	4950	NONE	0.003	0	0	0	-1.144256738	-0.424725786	-1.610592345	-0.41447462	NO	NO	NO	NO
1	208044378	208048715	esv3588678	4337	NONE	0	0	0	0.002	-1.226150558	0.225110977	-0.808062119	-0.574863597	NO	NO	NO	NO
1	208124980	208134964	esv3588681	9984	NONE	0	0	0	0	-1.549673949	-0.596903199	-1.44472867	-1.309279867	NO	NO	NO	NO
1	208434437	208435982	esv3588682	1545	NONE	0.0023	0	0	0	1.807758977	1.746321797	2.528783472	0.362368467	NO	NO	NO	NO
1	208605225	208607285	esv3588685	2060	NONE	0	0	0.001	0	-0.224458471	-0.436793623	-0.223293659	0.16786299	NO	NO	NO	NO
1	208624797	208626269	esv3588687	1472	NONE	0.0015	0	0	0	-0.562405634	-0.46842056	0.615851835	2.407847263	NO	NO	NO	NO
1	208643322	208645046	esv3588688	1724	NONE	0.0008	0	0	0	0.106588702	-0.701442108	0.331447393	0.045563723	NO	NO	NO	NO
1	208724567	208738573	esv3588690	14006	NONE	0	0	0.001	0	-0.768329256	-0.852661184	-0.041748142	0.230744669	NO	NO	NO	NO
1	208778518	208794630	esv3588693	16112	NONE	0	0	0	0	-0.358464731	-1.113063228	-0.499685472	-0.756182892	NO	NO	NO	NO
1	209008725	209012052	esv3588695	3327	NONE	0	0	0.001	0	-0.680476654	-1.110928817	-0.244102276	0.647198851	NO	NO	NO	NO
1	209094654	209096091	esv3588697	1437	NONE	0	0	0	0.0051	0.891327061	-1.266851565	-1.256918235	1.769792233	NO	NO	NO	NO
1	209390530	209394187	esv3588700	3657	NONE	0	0	0.001	0	-0.812296186	-1.205767404	-0.109840085	-0.467564118	NO	NO	NO	NO
1	209450431	209458688	esv3588701	8257	NONE	0	0	0	0.001	0.972837207	1.219892911	1.976054124	4.887842154	NO	NO	NO	NO
1	209670692	209684585	esv3588702	13893	NONE	0	0.001	0	0	-0.253903773	0.031854193	-0.260048389	0.134360391	NO	NO	NO	NO
1	209759497	209761267	esv3588705	1770	NONE	0	0.001	0	0	-0.095468875	-0.35285669	-1.018261531	1.507643091	NO	NO	NO	NO
1	209854801	209856741	esv3588707	1940	NONE	0	0	0.005	0	-0.168886905	-0.102802297	0.504661598	-0.145350984	NO	NO	NO	NO
1	210078053	210085978	esv3588710	7925	NONE	0.5915	0.5716	0.4524	0.5286	-0.322650573	0.036060296	0.282058358	-0.421445655	NO	NO	NO	NO
1	210141637	210144783	esv3588711	3146	NONE	0.0008	0.002	0	0	-0.530784014	0.385161585	0.453525298	2.136164443	NO	NO	NO	NO
1	210261492	210262208	esv3588714	716	NONE	0	0.003	0	0.001	2.449562673	3.403795454	5.027147604	5.089720861	NO	NO	NO	NO
1	210284577	210289343	esv3588715	4766	NONE	0.084	0	0	0	-0.722377417	0.165787946	0.007030595	1.246254247	NO	NO	NO	NO
1	210347804	210351343	esv3588716	3539	NONE	0.003	0	0	0	0.121936547	-0.810087328	-0.229148673	-0.229996617	NO	NO	NO	NO
1	210440846	210442113	esv3588717	1267	NONE	0	0	0	0.001	-0.128347864	2.624113378	0.061575343	1.331672006	NO	NO	NO	NO
1	210601128	210603755	esv3588718	2627	NONE	0.0295	0	0.001	0	-0.278693616	-0.309998298	-0.556593301	0.488238019	NO	NO	NO	NO
1	210601328	210614161	esv3588719	12833	NONE	0.0295	0	0	0	-0.497106211	-0.371094426	-0.614603882	-0.153443143	NO	NO	NO	NO
1	210722465	210724881	esv3588720	2416	NONE	0.1036	0.0258	0.3383	0.1043	-1.272259541	-0.834709969	0.292361785	0.805641297	NO	NO	NO	NO
1	210781490	210784987	esv3588721	3497	NONE	0.0015	0	0	0	0.592130368	0.869515749	0.828062647	1.307363622	NO	NO	NO	NO
1	210824126	210827703	esv3588722	3577	NONE	0.0008	0	0	0	3.076391867	-0.999571142	-0.923325919	6.230485067	NO	NO	NO	NO
1	211000542	211012829	esv3588723	12287	NONE	0.0008	0	0	0	-0.163779576	-0.046269676	0.950406916	1.20418602	NO	NO	NO	NO
1	211124158	211127833	esv3588724	3675	NONE	0	0	0.001	0	-0.237812799	-0.791304206	-0.043784713	1.031149749	NO	NO	NO	NO
1	211369240	211370427	esv3588727	1187	NONE	0.0991	0.002	0	0	0.729893018	2.415162354	0.214201974	2.092762603	NO	NO	NO	NO
1	211383638	211390485	esv3588729	6847	NONE	0.0008	0	0.002	0	0.463746603	1.045114297	-0.129995301	-0.505250385	NO	NO	NO	NO
1	211504530	211513639	esv3588730	9109	NONE	0	0	0	0.001	-1.567676538	-1.202814684	-1.443858365	-1.020074567	NO	NO	NO	NO
1	211553643	211557709	esv3588731	4066	LINC00467:1	0	0	0	0.001	0.019133946	0.158165642	-1.201435876	-0.625658125	NO	NO	NO	NO
1	211655460	211656792	esv3588734	1332	NONE	0.034	0	0	0	-0.455110399	-0.495210108	-0.187116391	-0.345561378	NO	NO	NO	NO
1	211965009	211965782	esv3588737	773	NONE	0.0015	0.0288	0	0.0072	-0.323011299	-9.264254328	-1.313188849	0.738294965	NO	YES	NO	NO
1	211980623	211981678	esv3588738	1055	NONE	0	0.003	0	0	2.021230638	3.329127986	2.644698868	3.12047457	NO	NO	NO	NO
1	212064080	212064574	esv3588739	494	NONE	0	0	0.001	0	0.176257065	0.261144515	-0.064617526	4.936790803	NO	NO	NO	NO
1	212096649	212097813	esv3588740	1164	NONE	0	0	0	0.0031	0.207641941	-1.427461433	0.129423515	-0.303695821	NO	NO	NO	NO
1	212290586	212291300	esv3588742	714	NONE	0.0008	0	0	0.001	0.665772865	2.560032905	3.180920377	0.332402638	NO	NO	NO	NO
1	212297167	212302229	esv3588743	5062	NONE	0	0	0	0	-1.482836799	-0.562313007	-1.679916539	-0.044702063	NO	NO	NO	NO
1	212323978	212324504	esv3588745	526	NONE	0.0053	0	0	0	-2.080381061	0.819001722	-3.692349771	-2.413956861	NO	NO	NO	NO
1	212324848	212327847	esv3588746	2999	NONE	0.0053	0	0	0	-0.019279145	-0.487707686	-1.167399482	-0.411762035	NO	NO	NO	NO
1	212384267	212386703	esv3588747	2436	LINC02608:1	0	0	0.0109	0	-0.654928176	1.82968844	-0.573692777	0.852943858	NO	NO	NO	NO
1	212407264	212408629	esv3588748	1365	LINC02608:1	0	0	0.001	0	-2.345480239	-0.752734681	-2.489370938	1.158629717	NO	NO	NO	NO
1	212471179	212472619	esv3588749	1440	NONE	0.9448	0.6441	0.5298	0.6462	9.031020628	5.459674321	8.849681767	-3.61688942	NO	NO	NO	NO
1	213002037	213013756	esv3588756	11719	SPATA45:2	0.0008	0.0368	0.0119	0.0378	-12.63057958	-10.27689159	-11.90512656	0.021788862	YES	YES	YES	NO
1	213059674	213061054	esv3588758	1380	NONE	0.0008	0	0	0	1.005547423	0.847654873	0.692280639	0.092315935	NO	NO	NO	NO
1	213081105	213082011	esv3588759	906	NONE	0	0	0.001	0	-0.36776471	1.327706175	0.338014623	2.060534388	NO	NO	NO	NO
1	213083966	213086597	esv3588760	2631	NONE	0.3192	0.7813	0.9087	0.8517	-3.519944204	-3.726572541	-4.727628358	1.858973895	NO	NO	NO	NO
1	213312458	213320229	esv3588764	7771	NONE	0.0015	0	0	0	0.493344073	1.549580073	0.432753513	-0.280993878	NO	NO	NO	NO
[truncated: 30,155 more rows]
