# Supplementary material for: Balancing selection on genomic deletion polymorphisms in humans
Source: eLife. 2023 Jan 10;12:e79111. doi: 10.7554/eLife.79111 (PMC9943071; doi:10.7554/eLife.79111)
Supplement: Supplementary file 2. [file elife-79111-supp2.csv]

CHR	START	END	ESV	GENE:NUMBER_OF_EXONS	YRI_FREQ	CEU_FREQ	CHB_FREQ	ARCHDELSTATUS	CHIMP_REF_STATUS	GWAS_TRAIT	TOP_GWAS_SNP	EFFECT_SIZE	GWAS_P_VALUE	YRI_BETAMAX	YRI_BETAPRIME	CEU_BETAMAX	CEU_BETAPRIME	CHB_BETAMAX	CHB_BETAPRIME	GEVA_MAXAGE	GEVA_AGEPRIME	RELATE_AGE	ASSOCIATED_PHENOTYPIC_CATEGORIES
19	22938999	22939548	esv3643969	ZNF99:1	0.365741	0.020202	0.0970874	Absent	NO_DUP_NO_DEL	NA	NA	NA	NA	0.996514	0.025443	5.210087	4.36858	4.355943	2.055764	38973.3	29576.6	794025.8345	NONE
19	52888800	52891387	esv3644692	ZNF880:1	0.263889	0.136364	0.121359	Absent	NO_DUP_NO_DEL	NA	NA	NA	NA	NA	NA	NA	NA	NA	NA	37347	8084.61	333411.14	NONE
19	9863483	9872020	esv3643641	ZNF846:4	0.0416667	0	0	Absent	NO_DUP_NO_DEL	NA	NA	NA	NA	1.154974	-0.26255	NA	NA	NA	NA	8558.89	8039.26	22223.5419	NONE
19	12164611	12177710	esv3643692	ZNF844:1	0	0	0.0631068	Absent	NO_DUP_NO_DEL	NA	NA	NA	NA	NA	NA	NA	NA	NA	NA	1162.9	1162.9	33553.114	NONE
1	227842501	227842995	esv3589037	ZNF678:1	0	0	0.0485437	Absent	NO_DUP_NO_DEL	NA	NA	NA	NA	NA	NA	NA	NA	-0.354545	-0.522366	1412.93	1343.61	62176.968	NONE
17	5085213	5085727	esv3639807	ZNF594:1	0.0462963	0	0	Absent	NO_DUP_NO_DEL	NA	NA	NA	NA	-0.047127	-0.373458	NA	NA	NA	NA	3223.67	1305.15	NA	NONE
19	57777623	57779772	esv3644900	ZNF460-AS1:1	0.0416667	0	0	Absent	NO_DUP_NO_DEL	NA	NA	NA	NA	0.265378	0.265378	NA	NA	NA	NA	14110.7	14110.7	219725.17	NONE
10	31199277	31204569	esv3622798	ZNF438:1	0.0138889	0	0	Absent	NO_DUP_NO_DEL	NA	NA	NA	NA	1.749646	0.013535	NA	NA	NA	NA	2065.45	1875.24	15658.419	NONE
7	64280112	64283091	esv3613425	ZNF138:1	0.101852	0	0	Absent	NO_DUP_NO_DEL	NA	NA	NA	NA	-0.761711	-6.648531	NA	NA	NA	NA	2235.27	1807.83	NA	NONE
8	106796535	106797312	esv3618291	ZFPM2-AS1:1	0.375	0	0	Absent	NO_DUP_NO_DEL	NA	NA	NA	NA	3.731155	2.996443	NA	NA	NA	NA	40082.9	31357.7	1577860.62	NONE
7	1191278	1191742	esv3611801	ZFAND2A:1	0.0138889	0	0	Absent	DEL_OR_PARTIAL_DEL	NA	NA	NA	NA	NA	NA	NA	NA	NA	NA	1450.42	664.228	24196.1895	NONE
9	14686751	14688644	esv3619752	ZDHHC21:2	0.171296	0	0	Absent	NO_DUP_NO_DEL	NA	NA	NA	NA	4.281878	0.157666	NA	NA	NA	NA	26459.1	7282.75	553630.604	NONE
2	98856218	98886610	esv3591725	VWA3B:3	0.0277778	0	0	Absent	NO_DUP_NO_DEL	NA	NA	NA	NA	0.665232	0.665232	NA	NA	NA	NA	875.259	595.188	5497.142	NONE
16	22156827	22157973	esv3638199	VWA3A:1	0	0.010101	0	Absent	NO_DUP_NO_DEL	NA	NA	NA	NA	NA	NA	-2.321748	-2.321748	NA	NA	319.082	319.082	NA	NONE
3	41564143	41667421	esv3595975	ULK4:2	0	0	0.00970874	Absent	NO_DUP_NO_DEL	NA	NA	NA	NA	NA	NA	NA	NA	0.930844	0.82974	1086.05	517.598	NA	NONE
6	150280503	150285181	esv3611218	ULBP1:2	0.0185185	0	0	Absent	NO_DUP_NO_DEL	NA	NA	NA	NA	NA	NA	NA	NA	NA	NA	4173.52	2471.84	NA	NONE
10	13275313	13276286	esv3622400	UCMA:3	0.00925926	0	0	Absent	NO_DUP_NO_DEL	NA	NA	NA	NA	1.069228	1.069228	NA	NA	NA	NA	954.944	575.512	NA	NONE
6	83735442	83737031	esv3609771	UBE3D:1	0.0185185	0	0	Absent	NO_DUP_NO_DEL	NA	NA	NA	NA	3.686314	2.525299	NA	NA	NA	NA	3717.09	3717.09	15042.118	NONE
2	130954939	130957401	esv3592442	TUBA3E:1	0.24537	0.343434	0.490291	Absent	NO_DUP_NO_DEL	NA	NA	NA	NA	NA	NA	NA	NA	NA	NA	51950.9	38063.8	NA	NONE
6	99967164	99972552	esv3610121	TSTD3:1	0.00925926	0	0	Absent	NO_DUP_NO_DEL	NA	NA	NA	NA	1.092036	0.594456	NA	NA	NA	NA	2263.38	843.842	NA	NONE
17	18596841	18605220	esv3640162	TRIM16L:4	0.0185185	0	0	Absent	NO_DUP_NO_DEL	NA	NA	NA	NA	-0.807111	-0.807111	NA	NA	NA	NA	7310.85	7310.85	NA	NONE
12	72655649	72657199	esv3629926	TRHDE-AS1:1	0	0	0.0145631	Absent	NO_DUP_NO_DEL	NA	NA	NA	NA	NA	NA	NA	NA	-1.753931	-1.753931	365.868	365.868	NA	NONE
11	36506536	36508682	esv3625956	TRAF6:1	0.00925926	0	0	Absent	NO_DUP_NO_DEL	NA	NA	NA	NA	1.782427	0.498536	NA	NA	NA	NA	61562.2	8559.13	NA	NONE
13	53159492	53178037	esv3632102	TPTE2P3:1	0.0138889	0	0	Absent	NO_DUP_NO_DEL	NA	NA	NA	NA	3.723967	1.202122	NA	NA	NA	NA	20493.4	2734.66	27436.15	NONE
13	45951543	45954145	esv3631955	TPT1-AS1:2	0.0185185	0	0	Recurrent	DUP	NA	NA	NA	NA	NA	NA	NA	NA	NA	NA	9613.3	9613.3	NA	NONE
1	154157587	154161373	esv3587601	TPM3:1	0.106481	0	0	Absent	NO_DUP_NO_DEL	NA	NA	NA	NA	-0.553454	-0.553454	NA	NA	NA	NA	1692.62	1692.62	325388.588	NONE
6	32025919	32029374	esv3608575	TNXB:2	0.0462963	0	0	Absent	NO_DUP_NO_DEL	NA	NA	NA	NA	1.881566	-0.9731	NA	NA	NA	NA	23758.3	2157.42	412521.76	NONE
6	10750307	10754128	esv3608084	TMEM14B:1	0.00925926	0	0	Absent	NO_DUP_NO_DEL	NA	NA	NA	NA	0.644149	0.644149	NA	NA	NA	NA	1600.47	1600.47	NA	NONE
15	71474402	71477933	esv3636851	THSD4-AS1:3	0	0.020202	0	Absent	NO_DUP_NO_DEL	NA	NA	NA	NA	NA	NA	0.131199	-1.398491	NA	NA	19857.2	7752.84	123500.657	NONE
5	78952091	78960030	esv3605543	TENT2:1	0	0	0.0194175	Absent	NO_DUP_NO_DEL	NA	NA	NA	NA	NA	NA	NA	NA	0.652887	0.652887	1244.36	1244.36	NA	NONE
17	25743065	25750927	esv3640291	TBC1D3P5:7	0.0462963	0	0	Absent	NO_DUP_NO_DEL	NA	NA	NA	NA	0.155071	-0.573476	NA	NA	NA	NA	5536.95	2781.13	81715.054	NONE
22	47570980	47571435	esv3647973	TBC1D22A:2	0.0185185	0	0	Absent	NO_DUP_NO_DEL	NA	NA	NA	NA	0.504868	0.504868	NA	NA	NA	NA	2030.09	2030.09	NA	NONE
6	147438410	147444450	esv3611163	STXBP5-AS1:1	0.0509259	0	0	Absent	NO_DUP_NO_DEL	NA	NA	NA	NA	-0.142319	-0.612602	NA	NA	NA	NA	21246.4	14640.9	165982.5347	NONE
15	80199891	80201110	esv3637011	ST20:1|ST20/gST20-MTHFS:1	0.087963	0	0	Absent	DUP	NA	NA	NA	NA	2.081297	-0.095531	NA	NA	NA	NA	19747.4	6177.16	548522.6982	NONE
6	44337502	44338912	esv3608829	SPATS1:1	0	0.010101	0	Absent	NO_DUP_NO_DEL	NA	NA	NA	NA	NA	NA	2.072584	-0.873829	NA	NA	247.441	211.823	NA	NONE
1	213002037	213013756	esv3588756	SPATA45:2	0	0.0505051	0.0145631	Introgressed	NO_DUP_NO_DEL	NA	NA	NA	NA	NA	NA	9.511022	2.399521	11.681578	2.87491	34412.2	9002.17	1705436.976	NONE
1	16751203	16755179	esv3585338	SPATA21:2	0	0	0.038835	Absent	NO_DUP_NO_DEL	NA	NA	NA	NA	NA	NA	NA	NA	-3.611144	-3.611144	844.333	844.333	134854.3	NONE
15	45131812	45145794	esv3636316	SORD2P:2	0.0185185	0	0	Absent	DUP	NA	NA	NA	NA	NA	NA	NA	NA	NA	NA	1220.49	1220.49	NA	NONE
15	25464528	25466696	esv3635921	SNORD115-27:1	0.125	0	0	Absent	NO_DUP_NO_DEL	NA	NA	NA	NA	1.792918	-0.138773	NA	NA	NA	NA	31077.4	13716.6	297557.559	NONE
20	37055110	37055815	esv3645784	SNHG17:1	0.037037	0.040404	0.106796	Absent	NO_DUP_NO_DEL	NA	NA	NA	NA	-0.103611	-0.393803	-0.331734	-1.834425	-0.492651	-2.00524	22428.1	11545	229719.28	NONE
15	25065537	25085018	esv3635908	SNHG14/gSNRPN:2|SNRPN:1	0.0185185	0	0	Absent	NO_DUP_NO_DEL	NA	NA	NA	NA	NA	NA	NA	NA	NA	NA	2688.45	2042.62	NA	NONE
15	25472182	25477682	esv3635922	SNHG14:6|SNORD115-21:1|SNORD115-31:1|SNORD115-32:1|SNORD115-33:1|SNORD115-34:1	0.111111	0	0	Absent	NO_DUP_NO_DEL	NA	NA	NA	NA	0.915677	0.654397	NA	NA	NA	NA	17532.3	11795.4	181239.7125	NONE
15	25436617	25438534	esv3635920	SNHG14:2|SNORD115-10/gSNORD115-12|SNORD115-9:1|SNORD115-13:1|SNORD115-5:1	0.0925926	0.010101	0	Ancient	DUP	NA	NA	NA	NA	0.416475	-2.018519	2.194858	-5.008006	NA	NA	34972.8	30642.9	1136131.048	NONE
15	25420083	25430785	esv3635919	SNHG14:11|SNORD115-10/gSNORD115-12|SNORD115-9:2|SNORD115-5:2|SNORD115-3:1|SNORD115-4:1|SNORD115-6:1|SNORD115-7:1|SNORD115-8:1	0	0.030303	0	Absent	DUP	NA	NA	NA	NA	NA	NA	-2.536365	-2.536365	NA	NA	856.826	856.826	8495.41	NONE
7	129141155	129143204	esv3614999	SMKR1:1	0.037037	0	0	Recurrent	NO_DUP_NO_DEL	NA	NA	NA	NA	-0.947532	-0.947532	NA	NA	NA	NA	1663.46	1663.46	36376.522	NONE
6	66496631	66498029	esv3609309	SLC25A51P1:1	0.0185185	0	0	Absent	NO_DUP_NO_DEL	NA	NA	NA	NA	1.018095	0.698587	NA	NA	NA	NA	15907.2	5483.5	NA	NONE
6	160627743	160638090	esv3611431	SLC22A2:1	0.0138889	0	0	Absent	NO_DUP_NO_DEL	NA	NA	NA	NA	0.349655	-1.765558	NA	NA	NA	NA	3817.63	1621.99	218845.9467	NONE
5	79409526	79413820	esv3605550	SERINC5:2	0.0138889	0	0	Absent	NO_DUP_NO_DEL	NA	NA	NA	NA	0.721947	0.721947	NA	NA	NA	NA	9219.05	9219.05	319937.1607	NONE
22	43595149	43595747	esv3647860	SCUBE1:1	0.0509259	0.0353535	0.00485437	Absent	NO_DUP_NO_DEL	NA	NA	NA	NA	5.286271	1.509535	5.949048	0.975548	10.047463	1.763288	25203	8866.73	2718611.954	NONE
2	167155630	167158770	esv3593247	SCN1A-AS1:1	0.143519	0	0	Absent	NO_DUP_NO_DEL	NA	NA	NA	NA	1.274347	0.116137	NA	NA	NA	NA	21019.7	5937.63	415811.2467	NONE
13	78171272	78172191	esv3632781	SCEL:1	0.037037	0	0	Absent	NO_DUP_NO_DEL	NA	NA	NA	NA	1.239947	1.220735	NA	NA	NA	NA	1972.2	1671.59	76727.62067	NONE
19	11517418	11518619	esv3643671	RGL3:1	0	0.010101	0	Absent	NO_DUP_NO_DEL	NA	NA	NA	NA	NA	NA	NA	NA	NA	NA	NA	NA	NA	NONE
12	72189187	72190569	esv3629917	RAB21:1	0.37037	0.116162	0.446602	Absent	NO_DUP_NO_DEL	NA	NA	NA	NA	1.358117	1.358117	1.150518	1.150518	1.643488	1.643488	28019.1	28019.1	523399.8	NONE
8	97348214	97351778	esv3618119	PTDSS1:1	0.0277778	0	0	Absent	NO_DUP_NO_DEL	NA	NA	NA	NA	0.647102	0.413757	NA	NA	NA	NA	11074	2451.92	16917.054	NONE
13	20249620	20250754	esv3631399	PSPC1:2	0	0	0.00970874	Absent	NO_DUP_NO_DEL	NA	NA	NA	NA	NA	NA	NA	NA	5.29641	5.29641	726.47	726.47	23674.266	NONE
21	14981354	15016529	esv3646398	POTED:11	0.856481	0.580808	0.805825	Ancient	NO_DUP_NO_DEL	NA	NA	NA	NA	NA	NA	NA	NA	NA	NA	53342.8	53342.8	NA	NONE
1	20498758	20500658	esv3585417	PLA2G2C:2	0.00925926	0	0	Absent	NO_DUP_NO_DEL	NA	NA	NA	NA	0.582649	0.582649	NA	NA	NA	NA	586.087	370.943	NA	NONE
1	111928797	111934864	esv3587183	PGBP:4	0	0.020202	0	Absent	NO_DUP_NO_DEL	NA	NA	NA	NA	NA	NA	0.425512	0.425512	NA	NA	648.117	648.117	16529.562	NONE
5	140222274	140239347	esv3606958	PCDHA10:3|PCDHA8:2|PCDHA9:2	0.0555556	0.111111	0.038835	Absent	NO_DUP_NO_DEL	NA	NA	NA	NA	1.016739	-0.993595	0.384819	-2.024048	-1.182491	-1.985339	3289.64	3289.64	87187.1	NONE
13	100734298	100740238	esv3633338	PCCA-DT:1	0.0185185	0	0	Absent	NO_DUP_NO_DEL	NA	NA	NA	NA	2.143185	2.143185	NA	NA	NA	NA	2411.88	2394.3	66132.5805	NONE
19	41949829	42007093	esv3644380	PCAT19:4|ERICH4:1	0.00925926	0	0	Absent	NO_DUP_NO_DEL	NA	NA	NA	NA	NA	NA	NA	NA	NA	NA	3252.2	3252.2	NA	NONE
19	41972631	42008216	esv3644382	PCAT19:3	0.00925926	0	0	Absent	NO_DUP_NO_DEL	NA	NA	NA	NA	0.832443	0.832443	NA	NA	NA	NA	2585.85	1489.45	NA	NONE
22	23878668	23880310	esv3647404	PCAT14:1	0.0185185	0	0	Absent	NO_DUP_NO_DEL	NA	NA	NA	NA	1.080134	1.080134	NA	NA	NA	NA	3816.47	2196.88	NA	NONE
3	189839696	189841096	esv3599065	P3H2:1	0.0925926	0	0	Absent	NO_DUP_NO_DEL	NA	NA	NA	NA	2.264995	1.593804	NA	NA	NA	NA	15102.5	2730.73	172507.7667	NONE
12	9635128	9688881	esv3628506	OVOS:11	0.416667	0.646465	0.441748	Ancient	DUP	NA	NA	NA	NA	NA	NA	NA	NA	NA	NA	109245	2670.18	NA	NONE
11	7846660	7847583	esv3625305	OR5P3:1	0.0972222	0	0	Absent	NO_DUP_NO_DEL	NA	NA	NA	NA	1.585383	1.256909	NA	NA	NA	NA	30129.2	6836.8	184313.1691	NONE
11	5784478	5809216	esv3625250	OR52N1:1|OR52N5:1	0.236111	0.227273	0.228155	Absent	NO_DUP_NO_DEL	NA	NA	NA	NA	-0.352558	-0.352558	0.783001	0.783001	1.689773	1.689773	9888.93	7989.95	148192.38	NONE
11	4508984	4562392	esv3625186	OR52K1:1	0	0	0.0145631	Absent	NO_DUP_NO_DEL	NA	NA	NA	NA	NA	NA	NA	NA	-2.878517	-2.878517	544.435	544.435	NA	NONE
11	5873986	5883494	esv3625252	OR52E8:1	0.194444	0	0	Absent	NO_DUP_NO_DEL	NA	NA	NA	NA	1.614381	0.537648	NA	NA	NA	NA	30433	30433	375675.58	NONE
7	44417481	44419558	esv3613008	NUDCD3:1	0.00925926	0	0	Absent	NO_DUP_NO_DEL	NA	NA	NA	NA	2.939742	2.047545	NA	NA	NA	NA	7557.03	6962.81	NA	NONE
1	182776909	182782177	esv3588106	NPL:1	0	0.020202	0	Absent	NO_DUP_NO_DEL	NA	NA	NA	NA	NA	NA	1.101819	0.798492	NA	NA	1263.76	1115.3	53482.00667	NONE
5	43582971	43583861	esv3604909	NNT-AS1:1	0.0185185	0	0	Absent	NO_DUP_NO_DEL	NA	NA	NA	NA	0.670191	0.670191	NA	NA	NA	NA	6365.55	6365.55	133160.426	NONE
15	23029633	23030479	esv3635825	NIPA2:1	0.00925926	0	0	Absent	NO_DUP_NO_DEL	NA	NA	NA	NA	0.33255	0.33255	NA	NA	NA	NA	625.789	625.789	NA	NONE
2	133671912	133674536	esv3592517	NCKAP5-AS1:1	0	0.010101	0	Absent	NO_DUP_NO_DEL	NA	NA	NA	NA	NA	NA	-0.13897	-0.13897	NA	NA	897.216	897.216	NA	NONE
11	71212740	71215726	esv3626777	NADSYN1:1	0.00925926	0	0	Absent	NO_DUP_NO_DEL	NA	NA	NA	NA	3.055543	0.631407	NA	NA	NA	NA	11947.4	6398.8	37402.9495	NONE
6	30996123	30997734	esv3608523	MUC22:3	0	0	0.00970874	Absent	DUP	NA	NA	NA	NA	NA	NA	NA	NA	0.333883	0.081799	895.725	831.353	NA	NONE
6	30994854	30996707	esv3608522	MUC22:2	0.00925926	0	0	Ancient	DUP	NA	NA	NA	NA	0.921794	-0.13213	NA	NA	NA	NA	25013	25013	144739.28	NONE
8	17580685	17581850	esv3616495	MTUS1:1	0	0.0252525	0	Absent	NO_DUP_NO_DEL	NA	NA	NA	NA	NA	NA	0.167846	0.167846	NA	NA	1188.28	1188.28	557867.5993	NONE
16	3420447	3425029	esv3637664	MTRNR2L4:1	0.0185185	0	0	Absent	NO_DUP_NO_DEL	NA	NA	NA	NA	2.270678	0.268548	NA	NA	NA	NA	15710	15710	20322.554	NONE
6	151326027	151328575	esv3611243	MTHFD1L:1	0.00925926	0	0	Absent	NO_DUP_NO_DEL	NA	NA	NA	NA	NA	NA	NA	NA	NA	NA	1705.95	1705.95	7596.89	NONE
11	60227950	60229400	esv3626558	MS4A1:1	0	0	0.0436893	Introgressed	NO_DUP_NO_DEL	NA	NA	NA	NA	NA	NA	NA	NA	-0.002493	-0.002493	1460.83	1382.06	246480.99	NONE
12	72243515	72244429	esv3629919	MRS2P2:1	0.00925926	0	0	Absent	NO_DUP_NO_DEL	NA	NA	NA	NA	1.180914	0.065522	NA	NA	NA	NA	1698.07	1359.34	NA	NONE
11	3238736	3244087	esv3625135	MRGPRG-AS1:2|MRGPRG:1	0.0138889	0.0353535	0	Ancient	NO_DUP_NO_DEL	NA	NA	NA	NA	0.536783	0.477848	1.125794	-0.830082	NA	NA	21278.8	19816.5	NA	NONE
16	15501749	15503018	esv3638030	MPV17L:1	0.00925926	0	0	Absent	NO_DUP_NO_DEL	NA	NA	NA	NA	NA	NA	NA	NA	NA	NA	629.947	629.947	NA	NONE
10	28564621	28572671	esv3622742	MPP7:2	0.0231481	0	0	Absent	NO_DUP_NO_DEL	NA	NA	NA	NA	2.213362	1.225492	NA	NA	NA	NA	48297.7	3182.04	135822.8312	NONE
4	21447699	21467367	esv3599869	MIR7978:1	0.0138889	0	0	Absent	NO_DUP_NO_DEL	NA	NA	NA	NA	1.015998	1.015998	NA	NA	NA	NA	1878.1	1878.1	NA	NONE
9	94395802	94403287	esv3621067	MIR3910-1:1|MIR3910-2:1	0	0.020202	0	Absent	NO_DUP_NO_DEL	NA	NA	NA	NA	NA	NA	-0.167339	-0.167339	NA	NA	1139.67	1139.67	NA	NONE
8	96079381	96082325	esv3618097	MIR3150BHG:1	0.0324074	0	0	Ancient	NO_DUP_NO_DEL	NA	NA	NA	NA	2.494942	2.494942	NA	NA	NA	NA	21324.3	21324.3	612138.8	NONE
12	12260272	12265256	esv3628601	MIR1244-1/gMIR1244-2|MIR1244-3|MIR1244-4:1	0.00925926	0	0	Absent	NO_DUP_NO_DEL	NA	NA	NA	NA	0.992664	0.872664	NA	NA	NA	NA	5189.41	4242.91	43472.4395	NONE
5	115584902	115621560	esv3606397	MIR12130:1	0.0416667	0	0	Absent	NO_DUP_NO_DEL	NA	NA	NA	NA	1.049846	0.040414	NA	NA	NA	NA	8801.85	7903.61	NA	NONE
1	78833892	78835891	esv3586541	MGC27382:2	0.0833333	0.00505051	0	Absent	NO_DUP_NO_DEL	NA	NA	NA	NA	0.293046	0.293046	1.291829	1.291829	NA	NA	36748.4	36748.4	244422.92	NONE
1	11097642	11106422	esv3585212	MASP2:5	0.0138889	0	0	Absent	NO_DUP_NO_DEL	NA	NA	NA	NA	-0.524205	-0.524205	NA	NA	NA	NA	1129.3	1129.3	NA	NONE
4	6617983	6621884	esv3599506	MAN2B2:2	0	0.010101	0	Absent	NO_DUP_NO_DEL	NA	NA	NA	NA	NA	NA	1.113764	1.113764	NA	NA	227.36	227.36	NA	NONE
21	47609728	47611004	esv3647164	LSS:3	0.194444	0	0	Recurrent	NO_DUP_NO_DEL	NA	NA	NA	NA	0.604338	0.604338	NA	NA	NA	NA	5420.19	5420.19	163472.54	NONE
5	2712712	2715364	esv3603837	LSINCT5:1	0.0138889	0	0	Absent	NO_DUP_NO_DEL	NA	NA	NA	NA	3.023159	3.023159	NA	NA	NA	NA	9896.06	9896.06	26023.116	NONE
12	9559047	9561263	esv3628502	LOC728715:1	0.162037	0.0707071	0.00970874	Ancient	DUP	NA	NA	NA	NA	NA	NA	NA	NA	NA	NA	49001.5	49001.5	NA	NONE
7	56493670	56496850	esv3613274	LOC650226:3	0.0509259	0	0	Absent	NO_DUP_NO_DEL	NA	NA	NA	NA	NA	NA	NA	NA	NA	NA	3327.88	3327.88	NA	NONE
7	29679134	29686209	esv3612699	LOC646762:1	0	0.030303	0	Absent	NO_DUP_NO_DEL	NA	NA	NA	NA	NA	NA	NA	NA	NA	NA	515.508	515.508	39529.182	NONE
7	29688451	29690144	esv3612700	LOC646762:1	0.00462963	0.0757576	0.0485437	Absent	DUP	NA	NA	NA	NA	-0.009258	-0.009258	-0.111405	-0.322719	4.194449	1.677108	15696.5	8979	97546.91333	NONE
8	138822743	138825730	esv3618972	LOC401478:1	0	0.0555556	0	Absent	NO_DUP_NO_DEL	NA	NA	NA	NA	NA	NA	-1.285621	-1.285621	NA	NA	806.615	806.615	NA	NONE
7	56877472	56879069	esv3613290	LOC401357:1	0.101852	0	0	Absent	NO_DUP_NO_DEL	NA	NA	NA	NA	NA	NA	NA	NA	NA	NA	36058.4	15855.7	NA	NONE
15	100416670	100423244	esv3637441	LOC400464:2	0.0138889	0.217172	0.315534	Absent	NO_DUP_NO_DEL	NA	NA	NA	NA	NA	NA	NA	NA	NA	NA	NA	NA	NA	NONE
1	231319871	231321978	esv3589108	LOC149373:2	0.0694444	0	0	Absent	NO_DUP_NO_DEL	NA	NA	NA	NA	0.467992	0.207883	NA	NA	NA	NA	5892.23	1481.79	175847.382	NONE
14	103779331	103784222	esv3635587	LOC105378183:1	0.00925926	0	0	Absent	NO_DUP_NO_DEL	NA	NA	NA	NA	2.121585	1.198118	NA	NA	NA	NA	1741.05	1736.09	NA	NONE
6	44511542	44515746	esv3608833	LOC105375075:1	0.037037	0	0	Absent	NO_DUP_NO_DEL	NA	NA	NA	NA	-0.317122	-0.623023	NA	NA	NA	NA	1077.12	1077.12	NA	NONE
13	64412737	64413759	esv3632427	LOC102723968:1	0.0185185	0	0	Absent	DUP	NA	NA	NA	NA	NA	NA	NA	NA	NA	NA	1408.7	1408.7	NA	NONE
5	95966477	95967328	esv3605862	LOC101929710:1	0.125	0.292929	0.281553	Absent	NO_DUP_NO_DEL	NA	NA	NA	NA	-0.400064	-0.400064	0.640349	0.640349	1.04429	1.04429	19087.2	19087.2	71922.2	NONE
4	106940458	106943260	esv3601672	LOC101929577:1	0.101852	0	0.199029	Absent	NO_DUP_NO_DEL	NA	NA	NA	NA	-0.37939	-0.37939	NA	NA	2.893416	2.893416	2082.06	2082.06	360768.59	NONE
17	18729995	18745198	esv3640165	LOC101929141:3	0.449074	0.489899	0.339806	Absent	DUP	NA	NA	NA	NA	1.938758	-0.099147	3.639756	0.61114	3.746009	1.145699	39243.2	28649.6	472863.0667	NONE
8	9054980	9062729	esv3616174	LOC101929128:2	0	0.020202	0.00485437	Ancient	NO_DUP_NO_DEL	NA	NA	NA	NA	NA	NA	4.172076	0.07066	6.794866	2.453358	1930.82	1835.65	515065.8901	NONE
13	114050112	114054638	esv3633608	LOC101928841:2	0	0.0505051	0.00485437	Absent	NO_DUP_NO_DEL	NA	NA	NA	NA	NA	NA	2.453991	0.540376	4.471576	2.104012	3430.8	2438.36	302243.865	NONE
4	47991694	47992070	esv3600457	LOC101927157:1	0.0324074	0	0	Absent	NO_DUP_NO_DEL	NA	NA	NA	NA	-0.32604	-0.32604	NA	NA	NA	NA	3091.89	3091.89	19517.092	NONE
19	28405394	28411097	esv3644089	LOC101927151:3	0.0324074	0	0	Absent	NO_DUP_NO_DEL	NA	NA	NA	NA	3.667965	-0.276382	NA	NA	NA	NA	12255.2	3495.87	224124.432	NONE
3	158287498	158288359	esv3598338	LOC100996447:1	0	0.0151515	0	Absent	NO_DUP_NO_DEL	NA	NA	NA	NA	NA	NA	-0.420898	-0.420898	NA	NA	1558.32	1558.32	21704.592	NONE
12	74678143	74679816	esv3629985	LOC100507377:2	0	0	0.0242718	Absent	NO_DUP_NO_DEL	NA	NA	NA	NA	NA	NA	NA	NA	0.079059	0.079059	979.307	979.307	43053.122	NONE
10	8936477	8943406	esv3622297	LINC02676:1	0	0	0.0145631	Absent	NO_DUP_NO_DEL	NA	NA	NA	NA	NA	NA	NA	NA	0.381379	0.381379	729.012	517.096	17912.706	NONE
6	3195370	3195959	esv3607925	LINC02525:1	0.24537	0	0	Absent	NO_DUP_NO_DEL	NA	NA	NA	NA	2.127926	0.613494	NA	NA	NA	NA	31043.8	6221.14	268530.92	NONE
12	43020212	43027450	esv3629331	LINC02402:1	0.0185185	0.0808081	0.199029	Absent	NO_DUP_NO_DEL	NA	NA	NA	NA	0.605377	0.605377	1.714816	1.714816	1.109439	1.109439	5244.5	5244.5	181937.42	NONE
14	41608767	41668648	esv3634197	LINC02315:1	0	0.181818	0.145631	Absent	NO_DUP_NO_DEL	NA	NA	NA	NA	NA	NA	2.312442	2.312442	0.115215	0.115215	84473.1	3171.74	107198.14	NONE
16	76661506	76671085	esv3639133	LINC02125:2	0.0833333	0	0	Absent	NO_DUP_NO_DEL	NA	NA	NA	NA	-1.225226	-1.225226	NA	NA	NA	NA	9226.72	9070.29	206112.9933	NONE
2	132765386	132806367	esv3592500	LINC01945:3	0.0648148	0	0	Absent	DUP	NA	NA	NA	NA	NA	NA	NA	NA	NA	NA	20669.1	20669.1	NA	NONE
2	231564425	231567653	esv3594610	LINC01907:1	0.0324074	0	0	Absent	NO_DUP_NO_DEL	NA	NA	NA	NA	NA	NA	NA	NA	NA	NA	NA	NA	NA	NONE
19	35308977	35309706	esv3644218	LINC01801:1	0.0277778	0	0	Absent	NO_DUP_NO_DEL	NA	NA	NA	NA	-0.146092	-0.146092	NA	NA	NA	NA	1822.11	1725.97	316373.54	NONE
16	4300541	4301600	esv3637694	LINC01569:1	0.0138889	0	0	Absent	NO_DUP_NO_DEL	NA	NA	NA	NA	4.947413	4.01284	NA	NA	NA	NA	4606.92	3523.59	NA	NONE
10	67330928	67337824	esv3623575	LINC01515:2	0.0509259	0	0	Absent	NO_DUP_NO_DEL	NA	NA	NA	NA	NA	NA	NA	NA	NA	NA	4050.11	4050.11	177788.9365	NONE
3	14385028	14392225	esv3595367	LINC01267:3	0.00925926	0	0	Absent	NO_DUP_NO_DEL	NA	NA	NA	NA	3.55788	-0.620957	NA	NA	NA	NA	5198.91	2995.48	NA	NONE
2	239456855	239460379	esv3594764	LINC01107:1	0	0.010101	0	Absent	NO_DUP_NO_DEL	NA	NA	NA	NA	NA	NA	0.855241	0.855241	NA	NA	736.934	736.934	16820.706	NONE
4	178884828	178893358	esv3603319	LINC01098:1	0.0185185	0	0	Absent	NO_DUP_NO_DEL	NA	NA	NA	NA	4.38515	4.38515	NA	NA	NA	NA	1042.92	1042.92	365969.8	NONE
1	187295957	187301311	esv3588163	LINC01036:1	0.00925926	0	0	Absent	NO_DUP_NO_DEL	NA	NA	NA	NA	1.307666	1.307666	NA	NA	NA	NA	1663.78	1663.78	79354.38	NONE
3	63104369	63107212	esv3596387	LINC00698:1	0.0231481	0	0	Absent	NO_DUP_NO_DEL	NA	NA	NA	NA	0.160906	0.160906	NA	NA	NA	NA	3284.36	2853.51	106500.1933	NONE
12	128424938	128429002	esv3631129	LINC00508:1	0.0138889	0	0	Absent	NO_DUP_NO_DEL	NA	NA	NA	NA	3.342339	1.188061	NA	NA	NA	NA	3456.85	1389.74	173551.56	NONE
8	66091895	66094769	esv3617456	LINC00251:1	0.319444	0.00505051	0	Absent	NO_DUP_NO_DEL	NA	NA	NA	NA	0.87294	-0.529633	NA	NA	NA	NA	26726.6	26726.6	495465.124	NONE
1	152760084	152770547	esv3587569	LCE1D:2|LCE1E:1	0.185185	0.343434	0.038835	Absent	NO_DUP_NO_DEL	NA	NA	NA	NA	0.532987	0.532987	-0.223541	-0.223541	-0.639019	-0.639019	34304.6	30661.6	712837.0667	NONE
6	149989316	149995424	esv3611212	LATS1:1	0.0231481	0	0	Absent	NO_DUP_NO_DEL	NA	NA	NA	NA	-0.04347	-0.04347	NA	NA	NA	NA	876.254	876.254	12319.328	NONE
19	54880614	54884937	esv3644806	LAIR1:1	0.0509259	0	0	Absent	NO_DUP_NO_DEL	NA	NA	NA	NA	2.401071	2.401071	NA	NA	NA	NA	26209.5	22139	NA	NONE
17	39421554	39432271	esv3640582	KRTAP9-6:1|KRTAP9-7:1	0.481481	0.691919	0.626214	Absent	NO_DUP_NO_DEL	NA	NA	NA	NA	2.093848	-0.725327	4.611367	-1.768988	4.981474	-1.52094	144922	4164.51	809654.2109	NONE
17	39265891	39289211	esv3640579	KRTAP4-11:1|KRTAP4-12:1|KRTAP4-8:1	0.0138889	0	0	Absent	NO_DUP_NO_DEL	NA	NA	NA	NA	0.439923	0.371759	NA	NA	NA	NA	498.646	498.646	NA	NONE
17	39506753	39525903	esv3640584	KRT33B:7|KRT33A:1	0.125	0	0	Absent	NO_DUP_NO_DEL	NA	NA	NA	NA	-0.574598	-0.574598	NA	NA	NA	NA	2697.33	1853.74	NA	NONE
12	10581300	10597036	esv3628538	KLRC2:6|KLRC1:1	0.185185	0.171717	0.169903	Absent	NO_DUP_NO_DEL	NA	NA	NA	NA	1.004433	1.004433	2.917085	-0.52925	0.457882	-0.636421	65043.8	17523.6	NA	NONE
7	23139865	23144324	esv3612536	KLHL7-DT:2	0.0462963	0	0	Absent	NO_DUP_NO_DEL	NA	NA	NA	NA	2.259525	-0.183514	NA	NA	NA	NA	6768.18	3947.93	104569.36	NONE
3	183266531	183266944	esv3598926	KLHL6-AS1:1	0.0462963	0	0	Ancient	NO_DUP_NO_DEL	NA	NA	NA	NA	4.778123	0.471503	NA	NA	NA	NA	42620.6	40722.3	1792718.6	NONE
17	68102863	68104450	esv3641143	KCNJ16:1	0	0	0.0145631	Absent	NO_DUP_NO_DEL	NA	NA	NA	NA	NA	NA	NA	NA	2.105558	-0.863703	354.765	354.765	43305.094	NONE
19	46622653	46628256	esv3644520	IGFL3:4	0.087963	0.030303	0.0776699	Absent	NO_DUP_NO_DEL	NA	NA	NA	NA	0.878281	0.043754	6.716957	0.743628	3.732761	1.726951	29742.6	24305.7	326763.4	NONE
3	50342786	50347824	esv3596141	HYAL1:1	0.125	0	0	Absent	NO_DUP_NO_DEL	NA	NA	NA	NA	0.337907	0.337907	NA	NA	NA	NA	3059.41	1672.43	NA	NONE
22	30443485	30447859	esv3647554	HORMAD2-AS1:1	0.0185185	0	0	Absent	NO_DUP_NO_DEL	NA	NA	NA	NA	1.404563	1.404563	NA	NA	NA	NA	620.47	620.47	NA	NONE
4	144833908	144940466	esv3602521	GYPB:7|LOC101927636:5	0.0601852	0	0	Absent	NO_DUP_NO_DEL	NA	NA	NA	NA	NA	NA	NA	NA	NA	NA	31135.1	8756.83	NA	NONE
22	24025584	24027537	esv3647412	GUSBP11:1	0.0509259	0.181818	0.0145631	Absent	NO_DUP_NO_DEL	NA	NA	NA	NA	NA	NA	NA	NA	NA	NA	37693.3	11488.5	259241.0917	NONE
10	114112179	114116659	esv3624582	GUCY2GP:2	0.314815	0.429293	0.616505	Ancient	NO_DUP_NO_DEL	NA	NA	NA	NA	4.284459	0.623717	5.763442	1.161328	5.268574	0.134974	26532.5	16098.7	2135108.267	NONE
7	66338193	66356825	esv3613527	GTF2IP23:3	0	0.010101	0	Absent	NO_DUP_NO_DEL	NA	NA	NA	NA	NA	NA	1.469842	1.469842	NA	NA	555.562	555.562	NA	NONE
14	96831203	96832675	esv3635422	GSKIP:1	0	0.010101	0	Absent	NO_DUP_NO_DEL	NA	NA	NA	NA	NA	NA	-1.222918	-1.222918	NA	NA	1127.48	1127.48	14226.702	NONE
8	144634055	144636240	esv3619112	GSDMD:1	0.00925926	0.166667	0.427184	Ancient	NO_DUP_NO_DEL	NA	NA	NA	NA	2.037031	0.612113	4.17726	0.547996	1.447674	0.151632	2708.72	2084.83	309144.29	NONE
9	132900520	132901859	esv3621854	GPR107:2	0	0	0.00970874	Absent	NO_DUP_NO_DEL	NA	NA	NA	NA	NA	NA	NA	NA	-1.961417	-2.510707	303.774	303.774	NA	NONE
19	22779109	22780476	esv3643958	GOLGA2P9:2	0.0277778	0	0	Absent	NO_DUP_NO_DEL	NA	NA	NA	NA	NA	NA	NA	NA	NA	NA	11282.5	2908.36	NA	NONE
1	89475930	89478613	esv3586751	GBP3:3	0.0231481	0.363636	0.218447	Absent	NO_DUP_NO_DEL	NA	NA	NA	NA	0.881973	0.881973	1.909113	1.909113	1.829217	1.829217	11867.5	1671.87	394859.43	NONE
11	71132854	71134392	esv3626776	FLJ42102:2	0.0277778	0	0	Absent	NO_DUP_NO_DEL	NA	NA	NA	NA	0.899853	0.899853	NA	NA	NA	NA	3035.85	2985.29	NA	NONE
1	60106249	60107104	esv3586190	FGGY:1	0.0787037	0.00505051	0	Absent	NO_DUP_NO_DEL	NA	NA	NA	NA	2.610031	1.078372	6.020401	-0.448626	NA	NA	13796.3	10747.8	191552.788	NONE
5	176524977	176529180	esv3607685	FGFR4:2	0.0416667	0	0	Absent	NO_DUP_NO_DEL	NA	NA	NA	NA	-0.308531	-0.308531	NA	NA	NA	NA	789.803	789.803	109734.016	NONE
20	34169372	34173106	esv3645716	FER1L4:7	0	0	0.0339806	Absent	NO_DUP_NO_DEL	NA	NA	NA	NA	NA	NA	NA	NA	5.060259	3.629924	1078.28	1010.21	34524.42	NONE
16	296386	300230	esv3637560	FAM234A:1	0.0138889	0	0	Absent	NO_DUP_NO_DEL	NA	NA	NA	NA	2.126034	2.126034	NA	NA	NA	NA	27581.4	3613.59	123573.7456	NONE
9	115854399	115875261	esv3621531	FAM225B:3|FAM225A:1	0.00925926	0	0	Absent	DUP	NA	NA	NA	NA	1.070636	0.335386	NA	NA	NA	NA	886.955	886.955	13568.198	NONE
4	187093487	187098252	esv3603522	FAM149A:2	0.185185	0.621212	0.349515	Absent	NO_DUP_NO_DEL	NA	NA	NA	NA	0.674802	0.131405	3.222161	3.222161	2.150947	2.150947	30161	27950	532146.5333	NONE
13	32532611	32538777	esv3631711	EEF1DP3:1	0.259259	0.0454545	0.228155	Absent	NO_DUP_NO_DEL	NA	NA	NA	NA	0.011715	0.011715	0.103403	0.103403	0.713691	0.713691	20173.9	20173.9	200237.8	NONE
20	18610225	18611259	esv3645442	DTD1:1	0	0.010101	0	Absent	NO_DUP_NO_DEL	NA	NA	NA	NA	NA	NA	-0.411722	-0.411722	NA	NA	365.99	365.99	10919.384	NONE
7	102823277	102825718	esv3614370	DPY19L2P2:1	0.0138889	0	0	Absent	NO_DUP_NO_DEL	NA	NA	NA	NA	4.059648	4.020295	NA	NA	NA	NA	16195.4	3671.94	NA	NONE
10	103355970	103356628	esv3624385	DPCD:1	0.00925926	0	0	Absent	NO_DUP_NO_DEL	NA	NA	NA	NA	0.752068	0.752068	NA	NA	NA	NA	871.7	871.7	NA	NONE
11	654249	655178	esv3625073	DEAF1:1	0.0601852	0	0	Absent	NO_DUP_NO_DEL	NA	NA	NA	NA	1.50524	-1.00303	NA	NA	NA	NA	34199.3	22557.7	739810.6001	NONE
1	206316086	206332140	esv3588654	CTSE:9	0	0.010101	0	Absent	NO_DUP_NO_DEL	NA	NA	NA	NA	NA	NA	1.002679	1.002679	NA	NA	284.975	284.975	NA	NONE
5	1178257	1180716	esv3603799	CTD-3080P12.3:1	0.0601852	0.439394	0.34466	Ancient	NO_DUP_NO_DEL	NA	NA	NA	NA	0.898721	0.898721	3.957265	2.813207	4.863846	2.890723	29764.9	23109.5	463120.72	NONE
8	19587252	19591067	esv3616548	CSGALNACT1:1	0	0.010101	0	Absent	NO_DUP_NO_DEL	NA	NA	NA	NA	NA	NA	0.154619	0.154619	NA	NA	446.42	407.2	NA	NONE
1	16809854	16811588	esv3585339	CROCCP3:3	0.185185	0	0	Absent	NO_DUP_NO_DEL	NA	NA	NA	NA	NA	NA	NA	NA	NA	NA	15895.3	1423.34	200558.0733	NONE
5	666727	668485	esv3603760	CEP72:1	0.0138889	0	0	Absent	NO_DUP_NO_DEL	NA	NA	NA	NA	1.837518	1.305239	NA	NA	NA	NA	3284.81	2510.29	NA	NONE
14	50825122	50827415	esv3634477	CDKL1:1	0	0.010101	0	Absent	NO_DUP_NO_DEL	NA	NA	NA	NA	NA	NA	NA	NA	NA	NA	732.231	732.231	NA	NONE
12	518338	519127	esv3628233	CCDC77:1	0.0416667	0	0	Absent	NO_DUP_NO_DEL	NA	NA	NA	NA	1.040418	1.040418	NA	NA	NA	NA	21367.4	1378.35	96922.455	NONE
15	40821891	40823560	esv3636227	CCDC32:1	0	0.030303	0	Absent	NO_DUP_NO_DEL	NA	NA	NA	NA	NA	NA	-0.077478	-0.83089	NA	NA	1387.2	1387.2	24100.937	NONE
17	20823295	20825773	esv3640223	CCDC144NL-AS1:1	0.101852	0	0	Ancient	NO_DUP_NO_DEL	NA	NA	NA	NA	NA	NA	NA	NA	NA	NA	40564.6	35225.7	204786.0593	NONE
9	141018924	141033836	esv3622055	CACNA1B:2	0	0.0505051	0	Absent	NO_DUP_NO_DEL	NA	NA	NA	NA	NA	NA	NA	NA	NA	NA	1473.27	1473.27	NA	NONE
3	37452880	37455583	esv3595892	C3orf35:2	0.0972222	0	0	Absent	NO_DUP_NO_DEL	NA	NA	NA	NA	1.190272	-0.184905	NA	NA	NA	NA	33533.8	16325.6	341970.02	NONE
3	37440508	37441973	esv3595891	C3orf35:1	0.00925926	0	0	Absent	NO_DUP_NO_DEL	NA	NA	NA	NA	0.532065	0.532065	NA	NA	NA	NA	10869.7	10869.7	32251.324	NONE
1	15486947	15491483	esv3585302	C1orf195:1	0.0185185	0	0	Absent	NO_DUP_NO_DEL	NA	NA	NA	NA	1.221591	1.067467	NA	NA	NA	NA	13853.4	4313.45	68039.762	NONE
18	46997684	47005315	esv3642494	C18orf32:1	0.226852	0	0	Absent	NO_DUP_NO_DEL	NA	NA	NA	NA	1.113958	-0.098832	NA	NA	NA	NA	4493.93	3100.55	32499.068	NONE
12	40301673	40315813	esv3629282	C12orf40:1	0.0277778	0	0	Absent	NO_DUP_NO_DEL	NA	NA	NA	NA	1.793216	-0.099306	NA	NA	NA	NA	4690.27	701.132	31307.4195	NONE
12	25083648	25107418	esv3628883	BCAT1:1	0	0.010101	0	Absent	NO_DUP_NO_DEL	NA	NA	NA	NA	NA	NA	-0.128763	-0.128763	NA	NA	86.122	86.122	NA	NONE
12	25093204	25133309	esv3628884	BCAT1:1	0	0.010101	0	Absent	NO_DUP_NO_DEL	NA	NA	NA	NA	NA	NA	-0.128763	-0.128763	NA	NA	86.122	86.122	NA	NONE
10	73862022	73866076	esv3623792	ASCC1:2	0.0138889	0	0	Absent	NO_DUP_NO_DEL	NA	NA	NA	NA	NA	NA	NA	NA	NA	NA	NA	NA	NA	NONE
10	52502727	52512754	esv3623214	ASAH2B:6	0.0509259	0	0	Recurrent	NO_DUP_NO_DEL	NA	NA	NA	NA	NA	NA	NA	NA	NA	NA	NA	NA	NA	NONE
12	7822643	7824321	esv3628432	APOBEC1:1	0.199074	0.212121	0.169903	Ancient	DEL_OR_PARTIAL_DEL	NA	NA	NA	NA	0.596568	-0.408346	0.182756	-0.189737	1.112672	0.86448	34794.9	33856	733768.9333	NONE
7	150552953	150562322	esv3615470	AOC1:5	0	0.010101	0	Absent	NO_DUP_NO_DEL	NA	NA	NA	NA	NA	NA	8.379451	0.720477	NA	NA	738.59	714.589	NA	NONE
17	48844118	48844503	esv3640753	ANKRD40CL:1	0.162037	0	0	Absent	NO_DUP_NO_DEL	NA	NA	NA	NA	1.096695	0.372812	NA	NA	NA	NA	18075.5	16349.2	310504.46	NONE
2	97812647	97825458	esv3591702	ANKRD36:6	0	0	0.0582524	Absent	NO_DUP_NO_DEL	NA	NA	NA	NA	NA	NA	NA	NA	NA	NA	1040.82	1040.82	NA	NONE
2	97854287	97856138	esv3591707	ANKRD36:2	0.0601852	0.747475	0.334951	Recurrent	NO_DUP_NO_DEL	NA	NA	NA	NA	NA	NA	NA	NA	NA	NA	18329.3	16441	NA	NONE
10	5903734	5906702	esv3622238	ANKRD16:1	0.00925926	0	0	Absent	NO_DUP_NO_DEL	NA	NA	NA	NA	-0.644471	-0.644471	NA	NA	NA	NA	905.233	905.233	NA	NONE
19	10212338	10214632	esv3643648	ANGPTL6:2	0	0.0151515	0	Absent	NO_DUP_NO_DEL	NA	NA	NA	NA	NA	NA	-0.969204	-0.969204	NA	NA	781.204	781.204	NA	NONE
3	129763168	129806784	esv3597754	ALG1L2:1	0.143519	0.40404	0.262136	Absent	NO_DUP_NO_DEL	NA	NA	NA	NA	0.435126	-2.568402	-1.649866	-7.58366	1.811976	-2.593771	35178.9	35178.9	NA	NONE
1	19599364	19614236	esv3585392	AKR7A3:6|AKR7L:1	0.0648148	0	0.00485437	Absent	NO_DUP_NO_DEL	NA	NA	NA	NA	0.402874	-0.073792	NA	NA	NA	NA	16974.3	1680.65	94816.77956	NONE
1	19612424	19614161	esv3585393	AKR7A3:2	0.0648148	0	0	Absent	DUP	NA	NA	NA	NA	0.091069	-0.073792	NA	NA	NA	NA	2302.93	1680.65	74984.896	NONE
1	49914496	49998562	esv3585997	AGBL4-IT1:2	0	0.0151515	0	Absent	NO_DUP_NO_DEL	NA	NA	NA	NA	NA	NA	-1.095625	-1.348438	NA	NA	985.924	827.056	12115.866	NONE
1	49931813	49947386	esv3585998	AGBL4-IT1:2	0	0.0151515	0	Absent	NO_DUP_NO_DEL	NA	NA	NA	NA	NA	NA	-1.095625	-1.348438	NA	NA	827.056	827.056	12115.866	NONE
8	39232005	39287823	esv3616948	ADAM5:7	0.0648148	0.449495	0.15534	Absent	NO_DUP_NO_DEL	NA	NA	NA	NA	0.415196	-1.180521	2.168394	-1.863914	0.286608	-2.772296	6292.23	6292.23	265121.276	NONE
8	39195825	39389230	esv3616947	ADAM3A:23|ADAM5:8	0.0648148	0.449495	0.15534	Absent	NO_DUP_NO_DEL	NA	NA	NA	NA	1.445095	-1.146292	2.703253	-1.603294	2.928091	-2.321921	15606.7	3101.16	359578.0671	NONE
3	132273085	132280237	esv3597827	ACAD11/gNPHP3-ACAD11:3|ACAD11:1	0	0.010101	0	Absent	NO_DUP_NO_DEL	NA	NA	NA	NA	NA	NA	-0.33678	-0.33678	NA	NA	431.304	431.304	NA	NONE
7	48391721	48401871	esv3613083	ABCA13:1	0.0416667	0	0	Absent	NO_DUP_NO_DEL	NA	NA	NA	NA	1.267307	1.267307	NA	NA	NA	NA	725.284	725.284	NA	NONE
12	9009995	9014429	esv3628483	A2ML1:4	0.0138889	0	0	Absent	NO_DUP_NO_DEL	NA	NA	NA	NA	1.97362	0.50152	NA	NA	NA	NA	1951.32	1506.97	68448.52	NONE
12	1028764	1029616	esv3628262	NONE	0.527778	0.449495	0.257282	Absent	NO_DUP_NO_DEL	Whole_body_fat-free_mass	rs4766373	-1.04E-01	9.47E-12	0.171201	-0.345798	0.456008	0.422302	0.489601	0.411599	45413.2	40300.2	710586.1	ANTHROPOMETRIC;METABOLISM
11	9525772	9526790	esv3625336	NONE	0.0601852	0.484848	0.334951	Absent	NO_DUP_NO_DEL	Water_intake	rs11042395	1.44E-02	3.54E-12	2.143391	-0.278239	1.38537	1.38537	2.050242	2.050242	38200.1	23371	404180	ANTHROPOMETRIC;METABOLISM;OTHERS
19	7258360	7259292	esv3643580	NONE	0.111111	0.0959596	0	Absent	NO_DUP_NO_DEL	Vascular/heart_problems_diagnosed_by_doctor:_High_blood_pressure	rs12978472	-2.12E-02	6.98E-44	-1.269169	-1.269169	-1.675948	-1.675948	NA	NA	17346.2	17346.2	NA	CARDIO;OTHERS
3	187732878	187734849	esv3599018	NONE	0.0231481	0.176768	0.140777	Ancient	NO_DUP_NO_DEL	Urea_(mmol/L)	rs73188630	-7.71E-02	1.50E-61	5.01527	0.455691	4.916614	-0.067926	5.513855	-0.712242	31186.1	30266.5	1034517.249	BLOOD
2	177265639	177272040	esv3593443	NONE	0.453704	0.833333	0.694175	Absent	NO_DUP_NO_DEL	Urate_(umol/L)	rs1520393	-1.28E+00	8.49E-10	-0.834364	-0.834364	-2.052167	-2.052167	-1.619273	-1.619273	38783.7	38783.7	461853	BLOOD
2	213370143	213371164	esv3594212	NONE	0	0.161616	0	Absent	NO_DUP_NO_DEL	Urate_(umol/L)	rs13422427	-1.81E+00	8.09E-15	NA	NA	1.352559	-0.431925	NA	NA	6131.62	2602.82	394983.5655	BLOOD
4	9576978	9577452	esv3599582	NONE	0.0509259	0.676768	0.451456	Absent	NO_DUP_NO_DEL	Urate_(umol/L)	rs6811619	5.08E+00	4.65E-180	NA	NA	NA	NA	NA	NA	21720.9	5164.3	NA	BLOOD
4	10272116	10274269	esv3599613	NONE	0	0.00505051	0.00970874	Ancient	NO_DUP_NO_DEL	Urate_(umol/L)	rs199838400	-7.89E+00	7.22E-14	NA	NA	3.387651	0.23152	0.663334	-0.031736	28833.6	7732.45	NA	BLOOD
5	161543256	161543860	esv3607413	NONE	0.0324074	0	0	Absent	NO_DUP_NO_DEL	Underlying_(primary)_cause_of_death:_ICD10:_G12.2_Motor_neuron_disease	rs114972096	6.04E+01	3.33E-36	1.407636	0.071052	NA	NA	NA	NA	1962.93	1626.62	NA	EYE;OTHERS;SKIN
7	159049413	159059533	esv3615762	NONE	0.00462963	0.00505051	0	Absent	NO_DUP_NO_DEL	Underlying_(primary)_cause_of_death:_ICD10:_G12.2_Motor_neuron_disease	rs141222232	1.64E-01	7.41E-09	4.64677	4.64677	-0.004514	-1.98848	NA	NA	4570.17	3304.08	NA	OTHERS
6	32026187	32027183	esv3608576	NONE	0.0462963	0	0	Absent	NO_DUP_NO_DEL	Underlying_(primary)_cause_of_death:_ICD10:_C45.9_Mesothelioma;_unspecified	rs547463127	4.07E-01	9.15E-09	1.881566	1.170949	NA	NA	NA	NA	23758.3	2640.38	412521.76	OTHERS
6	166497635	166502587	esv3611627	NONE	0.296296	0.00505051	0.0533981	Absent	NO_DUP_NO_DEL	Type_of_fat/oil_used_in_cooking:_Unknown_soft_margarine	rs73252852	3.54E-02	8.38E-12	1.563054	0.457129	3.653795	3.653795	4.71229	4.71229	8370.29	8370.29	315755.5567	OTHERS
11	740153	744738	esv3625078	NONE	0.0787037	0	0	Absent	NO_DUP_NO_DEL	Type_of_fat/oil_used_in_cooking:_Normal_fat_soya_margarine	rs114424122	4.88E-01	4.11E-37	1.461291	-1.22507	NA	NA	NA	NA	5020.5	4323.27	106828.103	CANCER;CARDIO;EYE;OTHERS;SKIN
6	19041250	19049391	esv3608258	NONE	0.0462963	0.146465	0.174757	Absent	NO_DUP_NO_DEL	Trunk_fat-free_mass	rs72828533	9.00E-02	1.40E-19	0.242687	0.112564	-0.549995	-1.630564	-1.15993	-2.183847	24883.7	1844.42	189430.92	ANTHROPOMETRIC;METABOLISM;OTHERS
11	68183089	68183404	esv3626737	NONE	0.412037	0.772727	0.81068	Absent	NO_DUP_NO_DEL	Trunk_fat-free_mass	rs685095	8.24E-02	5.35E-21	1.356684	0.331353	6.767269	1.833308	8.183389	2.280334	51436.6	47430.2	874986.3	ANTHROPOMETRIC;METABOLISM;OTHERS;RESPIRATORY
5	41901908	41903715	esv3604856	NONE	0.0972222	0	0	Absent	NO_DUP_NO_DEL	Treatment/medication_code:_vitamin_a	rs77869842	3.68E-03	3.46E-09	0.504991	-1.306654	NA	NA	NA	NA	35082.5	23094.8	269792.18	OTHERS
19	21156791	21166193	esv3643910	NONE	0.0277778	0	0	Absent	NO_DUP_NO_DEL	Treatment/medication_code:_tramacet_325mg/37.5mg_tablet	rs61734283	7.88E-02	1.41E-51	3.256779	0.294763	NA	NA	NA	NA	62757.8	5386.05	NA	BLOOD;INFLAMMATORY;NEURO;OTHERS
1	211655460	211656792	esv3588734	NONE	0.0277778	0	0	Absent	NO_DUP_NO_DEL	Treatment/medication_code:_timoptol_0.25%_eye_drops	rs61740158	5.32E-02	6.09E-38	6.916774	2.051915	NA	NA	NA	NA	49608.2	42780.4	2581038.74	CANCER;CARDIO;EYE;FEMALE;INFLAMMATORY;OTHERS;SKIN
3	28950217	28950806	esv3595704	NONE	0.0509259	0	0.0631068	Absent	NO_DUP_NO_DEL	Treatment/medication_code:_tetralysal_300_capsule	rs199870184	3.98E-03	2.73E-09	3.152511	0.104668	NA	NA	4.456113	1.281704	26620.2	10167.4	880002.2974	OTHERS
12	31828003	31830070	esv3629053	NONE	0.0462963	0	0	Absent	NO_DUP_NO_DEL	Treatment/medication_code:_strontium_product	rs115100488	7.39E-02	1.54E-49	2.863537	-0.810782	NA	NA	NA	NA	4455.74	4160.58	510174.4365	CANCER;EYE;IMMUNE;INFLAMMATORY;OTHERS
19	44957629	44963718	esv3644485	NONE	0.0694444	0	0	Absent	DUP	Treatment/medication_code:_stemetil_5mg_tablet	rs78530734	9.96E-02	3.75E-41	1.276766	-0.428305	NA	NA	NA	NA	25512.2	5481.22	706771.1933	BLOOD;CANCER;EYE;METABOLISM;NEURO;OTHERS;TEETH
19	50554711	50561348	esv3644638	NONE	0.240741	0	0	Absent	NO_DUP_NO_DEL	Treatment/medication_code:_reductil_10mg_capsule	rs61730172	1.51E-02	9.13E-22	7.14486	2.293356	NA	NA	NA	NA	31180	20367.1	2922760.315	NEURO;OTHERS;RESPIRATORY;SKIN
8	133060635	133061581	esv3618867	NONE	0.101852	0	0	Absent	NO_DUP_NO_DEL	Treatment/medication_code:_plaquenil_200mg_tablet	rs77225842	3.57E-03	3.42E-09	1.046128	1.046128	NA	NA	NA	NA	2153.18	1841.15	304141.9313	OTHERS
1	204381864	204384631	esv3588619	NONE	0.166667	0	0.0825243	Absent	NO_DUP_NO_DEL	Treatment/medication_code:_naramig_2.5mg_tablet	rs34146119	9.03E-03	1.11E-11	0.556624	0.556624	NA	NA	0.711018	0.711018	16597.1	16597.1	54484.22	OTHERS
6	77016708	77029161	esv3609600	NONE	0.00462963	0	0.0533981	Absent	NO_DUP_NO_DEL	Treatment/medication_code:_minocycline	rs547891884	4.62E-03	9.70E-12	2.128588	-0.209516	NA	NA	1.292154	-0.784209	10488.5	3153.42	390091.1751	OTHERS
7	90426002	90427625	esv3614110	NONE	0.0462963	0	0	Absent	NO_DUP_NO_DEL	Treatment/medication_code:_lymecycline	rs78919227	1.11E-01	3.46E-49	1.303765	-0.240299	NA	NA	NA	NA	2495.79	2201.45	167232.95	FEMALE;OTHERS
6	33292918	33295413	esv3608629	NONE	0.273148	0	0	Absent	NO_DUP_NO_DEL	Treatment/medication_code:_lumigan_0.3mg/ml_eye_drops	rs73410049	3.37E-02	1.19E-22	0.380416	-0.608021	NA	NA	NA	NA	2271.8	2205.54	271371.8	OTHERS
1	153857280	153858282	esv3587595	NONE	0.00925926	0	0	Absent	NO_DUP_NO_DEL	Treatment/medication_code:_lorazepam	rs187284284	6.83E-01	5.83E-26	1.075401	-1.444561	NA	NA	NA	NA	19709.1	3266.93	188657.4302	CANCER;FEMALE;OTHERS
19	22544651	22545499	esv3643949	NONE	0.0185185	0	0	Absent	NO_DUP_NO_DEL	Treatment/medication_code:_liquifilm_tears_1.4%_eye_drops	rs3906659	1.39E-01	3.63E-57	NA	NA	NA	NA	NA	NA	2102.58	2067.45	NA	CANCER;FEMALE;IMMUNE;OTHERS
2	71342540	71347886	esv3591223	NONE	0.194444	0	0	Absent	NO_DUP_NO_DEL	Treatment/medication_code:_ismn_-_isosorbide_mononitrate	rs72905540	3.47E-03	1.56E-09	1.936907	0.708521	NA	NA	NA	NA	28730.7	22850.3	1460520.535	OTHERS
6	33125925	33126851	esv3608622	NONE	0.0787037	0.20202	0.427184	Ancient	NO_DUP_NO_DEL	Treatment/medication_code:_insulin_product	rs9391755	-2.38E-03	4.66E-15	3.622264	0.136593	4.563176	0.394758	5.652876	0.902282	19819.8	11929.2	1803845.213	ANTHROPOMETRIC;INFLAMMATORY;OTHERS
6	33126442	33126764	esv3608623	NONE	0.0787037	0.20202	0.427184	Ancient	NO_DUP_NO_DEL	Treatment/medication_code:_insulin_product	rs9391755	-2.38E-03	4.66E-15	3.622264	0.136593	4.563176	0.394758	5.652876	0.902282	19819.8	11929.2	1803845.213	ANTHROPOMETRIC;INFLAMMATORY;OTHERS
11	88235631	88236787	esv3627146	NONE	0.0231481	0	0	Absent	NO_DUP_NO_DEL	Treatment/medication_code:_inderal_10mg_tablet	rs79345134	2.89E-02	4.58E-22	2.698168	-0.610939	NA	NA	NA	NA	45239.9	802.134	808255.548	EYE;INFLAMMATORY;OTHERS;SKIN
6	135608885	135610981	esv3610893	NONE	0.0231481	0	0	Absent	NO_DUP_NO_DEL	Treatment/medication_code:_gtn_-_glyceryl_trinitrate	rs115338154	4.94E-01	4.94E-64	2.391133	-0.179111	NA	NA	NA	NA	12073.2	2873.27	12317.081	OTHERS
14	45610942	45613055	esv3634343	NONE	0.0555556	0	0	Absent	NO_DUP_NO_DEL	Treatment/medication_code:_gamolenic_acid	rs61730251	9.98E-02	4.23E-69	1.30195	-0.406845	NA	NA	NA	NA	12937.2	5936.48	124880.8575	;INFLAMMATORY;NEURO;OTHERS;TEETH
1	53355267	53357912	esv3586055	NONE	0.0324074	0	0	Absent	NO_DUP_NO_DEL	Treatment/medication_code:_dorzolamide	rs111693547	1.50E-01	1.21E-85	2.525669	1.016077	NA	NA	NA	NA	30960.5	9109.33	601413.7896	CANCER;EYE;FEMALE;OTHERS
10	32988388	32989347	esv3622836	NONE	0.194444	0	0	Absent	NO_DUP_NO_DEL	Treatment/medication_code:_depakote_250mg_e/c_tablet	rs73259485	1.89E-03	8.31E-09	0.72743	-0.72638	NA	NA	NA	NA	31020.6	27180.8	NA	OTHERS
13	81805787	81814929	esv3632856	NONE	0.351852	0	0	Absent	NO_DUP_NO_DEL	Treatment/medication_code:_depakote_250mg_e/c_tablet	rs17073859	3.75E-03	8.62E-09	-0.343841	-0.343841	NA	NA	NA	NA	5009.94	4761	233678.8067	OTHERS
1	62437436	62452547	esv3586224	NONE	0.0324074	0	0	Absent	NO_DUP_NO_DEL	Treatment/medication_code:_co-amilozide	rs75900825	1.90E-01	1.15E-71	3.510849	-0.436621	NA	NA	NA	NA	5836.15	2389.59	103395.88	DIGESTIVE;IMMUNE;INFLAMMATORY;OTHERS
9	5133115	5133979	esv3619368	NONE	0.0324074	0	0	Absent	NO_DUP_NO_DEL	Treatment/medication_code:_calcium_carbonate+colecalciferol_1.25g/5micrograms_tablet	rs34832229	2.52E-01	4.02E-126	2.283016	0.713955	NA	NA	NA	NA	43552	34180.3	218683.3979	CARDIO;EYE;OTHERS
5	26009470	26011754	esv3604439	NONE	0.00925926	0	0	Absent	NO_DUP_NO_DEL	Treatment/medication_code:_brimonidine_tartrate	rs540809561	3.87E-03	1.59E-12	1.975084	-0.843357	NA	NA	NA	NA	9557.25	2003.71	NA	NONE
11	9503758	9509129	esv3625335	NONE	0.0740741	0	0	Absent	NO_DUP_NO_DEL	Treatment/medication_code:_adipine_mr_10_m/r_tablet	rs73406255	8.26E-02	3.65E-50	2.484059	2.484059	NA	NA	NA	NA	36638.6	3399.56	348343.94	CANCER;EYE;FEMALE;INFLAMMATORY;OTHERS;RESPIRATORY;TEETH
1	19647187	19648342	esv3585395	NONE	0.189815	0	0	Absent	NO_DUP_NO_DEL	Treatment/medication_code:_actonel_5mg_tablet	rs6656875	9.54E-03	4.01E-13	1.402246	1.402246	NA	NA	NA	NA	16339.2	3180.19	225401.1327	OTHERS
6	35626431	35629746	esv3608688	NONE	0.546296	0.69697	0.718447	Absent	NO_DUP_NO_DEL	Total_protein_(g/L)	rs9470080	7.32E-02	1.03E-11	0.228363	-0.839436	0.755663	-0.431758	0.986994	-0.720039	45957.6	45957.6	487310.8489	BLOOD
2	234543319	234544997	esv3594678	NONE	0.0925926	0.020202	0.00970874	Absent	NO_DUP_NO_DEL	Total_bilirubin_(umol/L)	rs4622711	-2.11E-01	7.01E-09	0.404953	-0.39047	1.127812	-0.747787	2.945334	-0.98194	30073.3	10276.2	NA	BLOOD
13	57768513	57786936	esv3632218	NONE	0.652778	0.141414	0.15534	Recurrent	NO_DUP_NO_DEL	Time_spent_using_computer	rs615008	2.04E-02	1.09E-09	0.660978	-0.334207	1.363334	-0.201477	0.559188	0.277325	9331.12	5692.07	558380.6044	OTHERS
11	29007143	29012766	esv3625787	NONE	0.49537	0.641414	0.398058	Absent	NO_DUP_NO_DEL	Time_spend_outdoors_in_summer	rs2356278	-1.35E-02	4.36E-10	0.654207	-1.119935	0.632267	-2.215277	2.297723	-2.308302	4885.3	4634.07	441420.9164	OTHERS
10	67306908	67315294	esv3623572	NONE	0.00925926	0.292929	0.383495	Absent	NO_DUP_NO_DEL	Testosterone_(nmol/L)	rs4746517	-6.35E-02	4.06E-18	0.288087	-0.209501	1.936578	0.468721	7.371573	1.206633	62419.5	2408.48	151531.24	BLOOD
2	225292994	225293946	esv3594470	NONE	0.652778	0.378788	0.456311	Absent	NO_DUP_NO_DEL	Standing_height	rs6734149	1.07E-01	8.79E-13	0.926045	0.926045	2.37114	-0.333316	3.122963	-0.310702	57372.9	40082.9	NA	ANTHROPOMETRIC
2	227342431	227347473	esv3594512	NONE	0	0.010101	0	Absent	NO_DUP_NO_DEL	Standing_height	rs116376456	-6.66E-01	5.18E-31	NA	NA	4.310898	0.163644	NA	NA	885.433	424.709	9001.622	ANTHROPOMETRIC;METABOLISM;RESPIRATORY
3	53027106	53038920	esv3596164	NONE	0	0.0757576	0.0679612	Absent	NO_DUP_NO_DEL	Standing_height	rs34943350	2.34E-01	4.16E-21	NA	NA	1.16672	-0.969358	1.41166	1.035556	3564.25	1714.29	291979.9283	ANTHROPOMETRIC;BLOOD;CARDIO;METABOLISM
4	145316454	145319900	esv3602540	NONE	0.435185	0.40404	0.475728	Absent	NO_DUP_NO_DEL	Standing_height	rs28839214	-2.01E-01	1.23E-39	1.922912	1.033705	2.713602	1.919298	2.846663	2.449972	46955.4	46955.4	538215.65	ANTHROPOMETRIC;OTHERS;RESPIRATORY
6	29650415	29651090	esv3608483	NONE	0	0.0707071	0.169903	Absent	NO_DUP_NO_DEL	Standing_height	rs183103224	-2.43E-01	1.30E-14	NA	NA	1.344976	1.267317	1.106508	1.106508	2012.89	2012.89	454753.0444	ANTHROPOMETRIC
6	141548586	141550030	esv3611051	NONE	0.0833333	0.429293	0.257282	Absent	NO_DUP_NO_DEL	Standing_height	rs9389889	-1.00E-01	9.47E-11	6.564899	-0.080486	8.009901	0.516735	8.388928	0.125709	21663.8	17509	1987124.845	ANTHROPOMETRIC
7	28214282	28214660	esv3612669	NONE	0.0648148	0.494949	0.00970874	Absent	NO_DUP_NO_DEL	Standing_height	rs702814	-2.51E-01	1.81E-63	0.103267	0.103267	0.399887	0.399887	3.294351	3.294351	3801.58	3801.58	196336.84	ANTHROPOMETRIC;BLOOD;INFLAMMATORY;METABOLISM;OTHERS;RESPIRATORY;SKIN
10	70786262	70787674	esv3623733	NONE	0.402778	0.40404	0.383495	Absent	NO_DUP_NO_DEL	Standing_height	rs2429011	1.12E-01	8.22E-14	-0.071634	-0.071634	-0.521499	-0.5215	-0.521776	-1.097529	29659.5	21524.9	452727.8	ANTHROPOMETRIC
10	70786356	70787310	esv3623734	NONE	0.393519	0.40404	0.383495	Absent	NO_DUP_NO_DEL	Standing_height	rs2429011	1.12E-01	8.22E-14	-0.026065	-0.071634	-0.521499	-0.5215	-0.521776	-1.097529	29659.5	21524.9	452727.8	ANTHROPOMETRIC
11	46161016	46162403	esv3626180	NONE	0.00462963	0.156566	0.0339806	Absent	NO_DUP_NO_DEL	Standing_height	rs77101145	1.21E-01	8.87E-10	1.022709	1.022709	-0.820471	-0.820471	-1.031946	-1.031946	25610.6	17582.4	259614.845	ANTHROPOMETRIC
11	66711479	66713552	esv3626701	NONE	0.402778	0.409091	0.543689	Absent	NO_DUP_NO_DEL	Standing_height	rs10791896	1.25E-01	4.99E-17	0.846406	-0.700949	1.504556	-1.246353	1.816678	-1.086937	54147.1	46584.7	1009787.1	ANTHROPOMETRIC;OTHERS
11	67642222	67644907	esv3626725	NONE	0.0462963	0.0808081	0.00485437	Absent	NO_DUP_NO_DEL	Standing_height	rs370185936	-2.42E-01	1.93E-17	NA	NA	NA	NA	NA	NA	26459.1	15718.3	1346984.065	ANTHROPOMETRIC
12	102102410	102107115	esv3630579	NONE	0.00925926	0.136364	0.126214	Absent	NO_DUP_NO_DEL	Standing_height	rs11110972	-1.29E-01	8.61E-09	0.504159	-0.270936	-0.267367	-0.628167	-0.116155	-0.613798	3549.96	2132.22	242165.21	ANTHROPOMETRIC
13	51069347	51075082	esv3632068	NONE	0.768519	0.767677	0.893204	Ancient	NO_DUP_NO_DEL	Standing_height	rs3116597	-3.23E-01	1.18E-79	3.584365	0.635141	4.804472	1.030778	5.620132	0.939638	80255.6	27265.3	1177470.525	ANTHROPOMETRIC;METABOLISM;OTHERS;RESPIRATORY
14	61058057	61059483	esv3634671	NONE	0.0138889	0.232323	0.383495	Absent	NO_DUP_NO_DEL	Standing_height	rs12889678	1.98E-01	1.10E-26	1.101174	-0.293016	-0.717806	-2.837682	-0.219987	-2.337786	2541.44	1997.11	208876.5467	ANTHROPOMETRIC;BLOOD;FEMALE;METABOLISM;RESPIRATORY
15	99574506	99575633	esv3637415	NONE	0.328704	0.727273	0.504854	Absent	NO_DUP_NO_DEL	Standing_height	rs2663101	-1.20E-01	6.23E-14	2.063199	-0.778476	1.192478	-1.073442	0.64417	-0.886619	18758.4	16515.4	657329.4	ANTHROPOMETRIC
15	100609946	100612578	esv3637459	NONE	0.0925926	0.0606061	0.0533981	Absent	NO_DUP_NO_DEL	Standing_height	rs75759672	1.80E-01	8.53E-09	1.331157	0.783286	2.802006	0.364424	0.64622	-1.387519	10472.3	9453.2	112747.068	ANTHROPOMETRIC
16	998832	1000718	esv3637599	NONE	0.75	0.378788	0.412621	Ancient	NO_DUP_NO_DEL	Standing_height	rs12447329	1.38E-01	1.26E-18	4.609575	2.074521	5.801843	1.066238	6.36008	1.823876	53305.9	51255.9	2499503.495	ANTHROPOMETRIC;BLOOD;METABOLISM
17	1654675	1655405	esv3639698	NONE	0.0185185	0.222222	0.475728	Absent	NO_DUP_NO_DEL	Standing_height	rs56679346	-1.10E-01	3.67E-11	1.265392	1.265392	1.555559	1.555559	0.431356	-0.830687	18320.6	16159.1	550828.054	ANTHROPOMETRIC
17	46904655	46907534	esv3640727	NONE	0.287037	0.040404	0.0582524	Absent	NO_DUP_NO_DEL	Standing_height	rs8076178	2.52E-01	2.67E-10	0.957349	-0.391974	1.238825	-0.725448	2.202636	0.001122	19702.6	8365.88	414951.6175	ANTHROPOMETRIC
12	14052329	14052822	esv3628638	NONE	0	0.292929	0	Absent	NO_DUP_NO_DEL	Spherical_power_(right)	rs61914291	-9.46E-02	4.07E-09	NA	NA	-0.10305	-0.10305	NA	NA	2682.12	2682.12	193725.28	EYE
17	1912668	1913537	esv3639703	NONE	0.337963	0.363636	0.504854	Ancient	NO_DUP_NO_DEL	Snoring	rs7217107	7.52E-03	1.62E-09	3.227595	1.01881	7.287752	1.913851	7.465412	3.400136	44181.7	34821.9	2378860.4	OTHERS
11	90193711	90196000	esv3627204	NONE	0.0694444	0.0757576	0.446602	Absent	NO_DUP_NO_DEL	Skin_colour	rs10765316	1.56E-02	1.76E-14	1.891815	0.095404	0.989824	0.721427	3.013169	0.041691	30677.7	3138.07	438457.62	SKIN
1	26460095	26464769	esv3585536	NONE	0.199074	0.186869	0.0436893	Absent	NO_DUP_NO_DEL	Sitting_height	rs111656050	1.13E-01	3.08E-23	3.603953	-0.665672	8.046249	-2.027983	7.332305	-1.355581	55641	28695.7	1090473.792	ANTHROPOMETRIC;BLOOD;METABOLISM;RESPIRATORY
6	131418012	131418980	esv3610804	NONE	0.0601852	0.267677	0.0436893	Absent	NO_DUP_NO_DEL	Sitting_height	rs4897496	-6.91E-02	6.68E-13	0.889207	-0.356161	0.415838	-0.200388	0.240936	0.240936	2370.33	2365.87	89443.69	ANTHROPOMETRIC;OTHERS
6	152389989	152392235	esv3611278	NONE	0.564815	0.0707071	0.320388	Absent	NO_DUP_NO_DEL	Sitting_height	rs11311524	1.02E-01	3.14E-13	1.955463	1.797172	3.880846	0.37259	3.521116	1.574416	28363.6	28363.6	1812962.34	ANTHROPOMETRIC;CARDIO
7	46113682	46115526	esv3613033	NONE	0.087963	0.0353535	0.0533981	Absent	NO_DUP_NO_DEL	Sitting_height	rs117974146	-2.55E-01	4.13E-13	6.724257	0.405612	8.487082	1.50733	7.995988	0.062789	33534.8	7742.74	2124167.67	ANTHROPOMETRIC
18	46979009	46979603	esv3642493	NONE	0.333333	0.282828	0.213592	Absent	DEL_OR_PARTIAL_DEL	Sitting_height	rs17725481	-1.16E-01	9.75E-33	-0.044833	-0.091848	0.562116	0.01349	0.681921	0.051025	57784.6	41215.1	456427.58	ANTHROPOMETRIC
18	50462570	50463032	esv3642558	NONE	0.393519	0.515152	0.223301	Absent	NO_DUP_NO_DEL	Sitting_height	rs151312837	5.77E-02	2.90E-11	2.70046	-0.011035	4.750104	1.065352	4.815711	-0.284001	28486.5	15896.1	1371437.604	ANTHROPOMETRIC;OTHERS
18	50612385	50612967	esv3642560	NONE	0.925926	0.641414	0.364078	Ancient	DEL_OR_PARTIAL_DEL	Sitting_height	rs4638654	7.94E-02	7.26E-19	2.125389	0.549473	2.906962	0.205836	5.867637	1.193304	91137.5	59413.4	935119.9368	ANTHROPOMETRIC;RESPIRATORY
19	37460720	37461278	esv3644274	NONE	0.361111	0.409091	0.0873786	Absent	NO_DUP_NO_DEL	Sitting_height	rs826294	-5.40E-02	1.06E-09	2.967849	1.373116	4.139849	2.088115	2.263655	1.845274	21912.6	18411.7	1122214.743	ANTHROPOMETRIC;BLOOD
22	29633088	29635394	esv3647527	NONE	0.268519	0.106061	0.092233	Ancient	NO_DUP_NO_DEL	Sitting_height	rs4547624	-8.93E-02	3.01E-09	0.356249	0.356249	-0.119515	-0.119515	-0.25489	-0.25489	46435.2	46435.2	603068.2	ANTHROPOMETRIC
22	35645163	35646142	esv3647661	NONE	0.0416667	0.661616	0.495146	Absent	NO_DUP_NO_DEL	Sitting_height	rs5755674	5.55E-02	1.77E-09	2.842853	-0.791678	3.566071	-0.315079	3.60801	-0.133902	9910.06	3733.51	677424.3255	ANTHROPOMETRIC
3	136020924	136026326	esv3597888	NONE	0.0416667	0.479798	0.825243	Absent	NO_DUP_NO_DEL	SHBG_(nmol/L)	rs1153877	-7.13E-01	2.68E-28	3.008279	0.286445	1.425354	-1.97179	3.383507	-1.030763	3222.86	2638.99	533594.2788	BLOOD;OTHERS
10	93633333	93634563	esv3624211	NONE	0.490741	0.469697	0.728155	Ancient	NO_DUP_NO_DEL	SHBG_(nmol/L)	rs11186721	4.62E-01	5.02E-13	1.717614	-2.592252	2.382	-3.068141	3.294944	-3.84591	77908.5	68733.7	992455.4	BLOOD
17	7336427	7337727	esv3639870	NONE	0.0185185	0.0959596	0.0582524	Absent	NO_DUP_NO_DEL	SHBG_(nmol/L)	rs113251489	-2.63E+00	3.91E-112	-1.303099	-1.303099	-3.309142	-3.309142	-3.20702	-3.20702	2883.56	2883.56	165359.6	BLOOD
17	47351759	47353066	esv3640736	NONE	0.208333	0.217172	0.276699	Absent	NO_DUP_NO_DEL	SHBG_(nmol/L)	rs78763027	7.83E-01	7.60E-25	1.031783	-0.900119	0.944592	-1.288772	1.151677	-1.011374	15978.7	5055.12	597460.7333	BLOOD
20	39906345	39907528	esv3645835	NONE	0.240741	0.151515	0.247573	Absent	NO_DUP_NO_DEL	SHBG_(nmol/L)	rs6124339	5.40E-01	4.88E-12	0.415865	0.071467	0.750139	-0.218375	1.651384	1.291387	28836.8	9224.67	303751.5133	BLOOD
12	99016624	99017950	esv3630513	NONE	0.106481	0	0	Absent	NO_DUP_NO_DEL	Sensorineural_hearing_loss	rs12322444	6.39E-03	7.22E-11	4.276284	-1.003384	NA	NA	NA	NA	7279.52	2637.82	329329.5911	NEURO
9	22496525	22504350	esv3619987	NONE	0.0277778	0.419192	0.0970874	Absent	NO_DUP_NO_DEL	Salt_added_to_food	rs55932598	-1.31E-02	1.43E-10	0.827997	-1.133218	-0.340179	-1.665635	1.904658	0.032557	73229.2	20934.3	138365.36	OTHERS
7	15413715	15418552	esv3612365	NONE	0.0138889	0	0	Absent	NO_DUP_NO_DEL	Retinal_detachment_with_retinal_break	rs80328842	1.21E+00	1.80E-64	-0.043968	-0.405582	NA	NA	NA	NA	2651.23	2377.31	NA	EYE;OTHERS
1	32874326	32875482	esv3585669	NONE	0.0324074	0	0	Absent	NO_DUP_NO_DEL	Reticulocyte_count	rs76813192	4.47E-01	1.71E-136	0.553741	0.067793	NA	NA	NA	NA	17732.2	11232.3	NA	BLOOD;CANCER;CARDIO;EYE;FEMALE;OTHERS
5	127335985	127336914	esv3606718	NONE	0.564815	0.308081	0.752427	Absent	NO_DUP_NO_DEL	Red_blood_cell_(erythrocyte)_distribution_width	rs4836354	1.50E-02	1.97E-09	-0.387661	-0.796771	-0.475791	-1.147168	-0.129224	-1.23487	60352.7	51135.3	906898.3	BLOOD
5	127407440	127410918	esv3606720	NONE	0.680556	0.217172	0.364078	Absent	NO_DUP_NO_DEL	Red_blood_cell_(erythrocyte)_distribution_width	rs62373701	3.39E-02	3.41E-36	0.533883	0.239333	1.169743	-0.023785	0.98798	-0.6306	60294.2	38010.1	552751.2667	BLOOD;OTHERS
7	32774939	32777677	esv3612746	NONE	0	0.222222	0.179612	Absent	NO_DUP_NO_DEL	Red_blood_cell_(erythrocyte)_distribution_width	rs112275123	2.09E-02	1.49E-13	NA	NA	4.748507	2.398139	5.771881	2.559455	21876.8	6487.19	NA	BLOOD
1	199110049	199113807	esv3588540	NONE	0.486111	0.126263	0	Absent	NO_DUP_NO_DEL	Red_blood_cell_(erythrocyte)_count	rs2648776	9.62E-03	8.68E-15	0.394568	0.394568	0.464033	0.464033	NA	NA	35029	34160.4	861585.2	BLOOD
3	70013451	70013889	esv3596506	NONE	0.328704	0.287879	0.31068	Absent	NO_DUP_NO_DEL	Red_blood_cell_(erythrocyte)_count	rs3821364	-5.54E-03	3.72E-09	4.955234	-0.320006	7.784539	-0.333632	6.756945	-0.273861	65514.2	3242.66	1399689.21	BLOOD
4	115511112	115513883	esv3601834	NONE	0.226852	0.121212	0.203883	Absent	NO_DUP_NO_DEL	Red_blood_cell_(erythrocyte)_count	rs34106205	-8.18E-03	4.62E-11	2.275369	0.195703	3.298122	-0.295716	3.725087	0.133453	32604.6	4722.36	1019479.421	BLOOD
11	10292738	10293842	esv3625353	NONE	0.305556	0.535354	0.31068	Ancient	NO_DUP_NO_DEL	Red_blood_cell_(erythrocyte)_count	rs7118500	-9.32E-03	1.01E-28	6.041168	4.195642	10.437968	8.116966	10.916818	6.862592	54485.8	44963.6	2615722.011	ANTHROPOMETRIC;BLOOD;METABOLISM;OTHERS
20	26092755	26094314	esv3645608	NONE	0.138889	0.186869	0.334951	Absent	NO_DUP_NO_DEL	Red_blood_cell_(erythrocyte)_count	rs28709652	-6.23E-03	3.27E-09	NA	NA	NA	NA	NA	NA	27827.1	6383.39	73355.8	BLOOD
5	106324752	106326434	esv3606186	NONE	0.291667	0.489899	0.582524	Absent	NO_DUP_NO_DEL	Recent_trouble_relaxing	rs34025237	-1.71E-02	1.69E-09	2.585711	0.002459	2.787574	0.686485	2.932814	0.592031	35451.9	31323.8	1112873.354	OTHERS
8	143494784	143495714	esv3619089	NONE	0.768519	0.828283	0.800971	Ancient	NO_DUP_NO_DEL	Qualifications:_None_of_the_above	rs6583627	6.59E-03	5.70E-09	7.861808	2.052021	8.382506	3.268069	8.672397	2.664377	55459.3	44321.5	2612732.833	OTHERS
2	142325290	142329147	esv3592716	NONE	0	0.106061	0	Absent	NO_DUP_NO_DEL	Qualifications:_College_or_University_degree	rs62166488	-1.29E-02	3.35E-09	NA	NA	2.482169	0.621769	NA	NA	2747.73	1716.19	549060.372	OTHERS
9	23362812	23377678	esv3620012	NONE	0.0787037	0.414141	0.543689	Absent	NO_DUP_NO_DEL	Qualifications:_College_or_University_degree	rs11793831	1.42E-02	1.68E-37	0.930781	0.245414	1.587525	-0.967068	1.517655	-0.18831	24541.3	3280.35	473416.6967	ANTHROPOMETRIC;METABOLISM;OTHERS
9	23370987	23372431	esv3620013	NONE	0.106481	0.414141	0.543689	Absent	NO_DUP_NO_DEL	Qualifications:_College_or_University_degree	rs11793831	1.42E-02	1.68E-37	0.466302	0.245414	1.587525	-0.967068	1.517655	-0.18831	24541.3	3280.35	490449.4875	ANTHROPOMETRIC;METABOLISM;OTHERS
18	35306041	35306639	esv3642249	NONE	0.324074	0.666667	0.747573	Recurrent	NO_DUP_NO_DEL	Qualifications:_College_or_University_degree	rs1365657	7.30E-03	5.94E-10	0.681444	-0.516743	2.049987	-2.36063	2.885794	-2.091114	46123.5	34198.3	495688.41	OTHERS
1	47623401	47625593	esv3585952	NONE	0	0	0.0582524	Introgressed	NO_DUP_NO_DEL	Pyogenic_granuloma	rs201802480	2.49E-02	2.24E-16	NA	NA	NA	NA	0.993592	0.177354	3281.54	1364.63	317900.45	CANCER;DIGESTIVE;HORMONAL;OTHERS;SKIN
7	93541824	93542540	esv3614174	NONE	0.337963	0.691919	0.800971	Absent	NO_DUP_NO_DEL	Pulse_rate;_automated_reading	rs28438575	-3.35E-01	1.81E-31	0.117561	0.117561	1.564719	1.564719	2.556278	2.556278	23176.9	23176.9	NA	CARDIO
12	33296520	33307372	esv3629097	NONE	0.0740741	0.217172	0.092233	Absent	NO_DUP_NO_DEL	Pulse_rate;_automated_reading	rs112801636	-2.35E-01	5.68E-13	0.926113	0.083268	1.547986	0.195421	1.10034	0.007767	18666.6	2707.44	345915.36	CARDIO
12	34845067	34849183	esv3629175	NONE	0	0.449495	0.0291262	Absent	DEL_OR_PARTIAL_DEL	Pulse_rate;_automated_reading	rs144552280	2.80E-01	1.35E-23	NA	NA	NA	NA	NA	NA	1763.1	1488.66	NA	BLOOD;CARDIO;OTHERS
12	37991227	37994637	esv3629182	NONE	0	0.449495	0.0339806	Absent	NO_DUP_NO_DEL	Pulse_rate;_automated_reading	rs34971260	2.91E-01	1.12E-24	NA	NA	NA	NA	NA	NA	26558.3	1606.38	NA	BLOOD;CARDIO;OTHERS
12	38009953	38018211	esv3629184	NONE	0	0.449495	0.0339806	Absent	NO_DUP_NO_DEL	Pulse_rate;_automated_reading	rs34971260	2.91E-01	1.12E-24	NA	NA	NA	NA	NA	NA	26558.3	1498.02	NA	BLOOD;CARDIO;OTHERS
14	23922251	23922650	esv3633777	NONE	0.342593	0.833333	0.606796	Absent	NO_DUP_NO_DEL	Pulse_rate;_automated_reading	rs10142383	-3.13E-01	2.49E-22	0.87832	0.691811	3.790814	2.934308	2.927616	1.739293	17828.7	12710.8	446879.055	CARDIO
18	26273060	26278418	esv3642064	NONE	0.314815	0.217172	0.466019	Absent	DEL_OR_PARTIAL_DEL	Pulse_rate;_automated_reading	rs7233387	2.32E-01	3.70E-13	3.34814	-0.752595	10.575675	-0.67904	6.856532	0.324286	2946.82	2276.34	805060.62	CARDIO
5	12811023	12820529	esv3604052	NONE	0.0324074	0.525253	0.135922	Absent	DEL_OR_PARTIAL_DEL	Plays_computer_games	rs34817600	-7.07E-03	1.76E-09	1.740195	1.740195	0.194399	0.194399	1.36391	1.36391	5565.41	1497.23	292989.2	OTHERS
3	47490669	47493444	esv3596080	NONE	0.226852	0.439394	0.567961	Absent	NO_DUP_NO_DEL	Platelet_distribution_width	rs148152356	-1.54E-02	4.11E-35	2.171614	-0.201267	1.735011	1.735011	1.183301	1.183301	47439.4	35204.2	430671.1733	BLOOD
6	32778682	32779821	esv3608616	NONE	0.453704	0.60101	0.708738	Ancient	NO_DUP_NO_DEL	Platelet_distribution_width	rs9276796	-1.47E-02	1.21E-31	3.292929	1.654876	3.978168	0.362803	3.933896	0.602916	50090.3	46724.4	872077.7333	ANTHROPOMETRIC;BLOOD;INFLAMMATORY;OTHERS;RESPIRATORY
8	11245530	11247217	esv3616249	NONE	0.787037	0.409091	0.0194175	Absent	NO_DUP_NO_DEL	Platelet_distribution_width	rs4841525	1.39E-02	1.46E-27	0.018625	-0.314479	-0.512154	-1.168629	1.216067	1.216067	50747.1	49130.7	NA	ANTHROPOMETRIC;BLOOD;OTHERS
17	57870031	57871487	esv3640911	NONE	0.087963	0.560606	0.398058	Absent	NO_DUP_NO_DEL	Platelet_distribution_width	rs1292064	-2.38E-02	1.75E-83	1.135921	0.381226	0.722031	0.145768	2.126352	2.126352	113438	4012.57	382640.8507	ANTHROPOMETRIC;BLOOD;IMMUNE
17	57870250	57871180	esv3640912	NONE	0.087963	0.560606	0.398058	Absent	NO_DUP_NO_DEL	Platelet_distribution_width	rs1292064	-2.38E-02	1.75E-83	1.135921	0.381226	0.722031	0.145768	2.126352	2.126352	113438	4012.57	382640.8507	ANTHROPOMETRIC;BLOOD;IMMUNE
22	43101430	43102189	esv3647838	NONE	0.12963	0.414141	0.252427	Absent	NO_DUP_NO_DEL	Platelet_distribution_width	rs1989502	-1.06E-02	1.51E-17	1.659878	1.11422	2.12775	1.785374	1.796826	1.577604	20733.3	20733.3	661421.8333	BLOOD
1	185009806	185011738	esv3588133	NONE	0.157407	0.0555556	0.150485	Absent	NO_DUP_NO_DEL	Platelet_crit	rs12403262	-1.58E-03	5.97E-11	0.290088	0.252421	1.970992	1.970992	0.732133	-0.542758	32702.3	7413.07	414634.5117	BLOOD
3	184125346	184125555	esv3598943	NONE	0.824074	0.585859	0.407767	Ancient	NO_DUP_NO_DEL	Platelet_crit	rs62287526	7.36E-04	8.41E-11	4.308254	2.893876	4.617942	2.838628	4.624155	3.301657	43406.2	36812.6	2555045	BLOOD
6	31337847	31341985	esv3608560	NONE	0	0.0252525	0.0679612	Absent	NO_DUP_NO_DEL	Platelet_crit	rs115258500	3.54E-03	1.26E-09	NA	NA	NA	NA	NA	NA	5616.23	3761.34	NA	BLOOD
9	91408347	91409218	esv3621011	NONE	0	0.030303	0	Absent	NO_DUP_NO_DEL	Platelet_crit	rs142550358	-4.37E-03	9.79E-68	NA	NA	NA	NA	NA	NA	NA	NA	NA	BLOOD
16	75429831	75430673	esv3639091	NONE	0.291667	0.590909	0.509709	Ancient	NO_DUP_NO_DEL	Platelet_crit	rs113251659	8.81E-04	7.99E-15	4.662843	2.095243	5.319854	3.519985	7.845261	4.144816	64856.6	8666.06	1613122.966	ANTHROPOMETRIC;BLOOD;CARDIO;OTHERS;RESPIRATORY
17	35755640	35758781	esv3640492	NONE	0.106481	0.378788	0.0194175	Absent	NO_DUP_NO_DEL	Platelet_crit	rs113593735	1.06E-03	4.22E-20	0.70454	-1.221552	-0.518359	-2.046289	1.394003	0.368121	2558.26	2558.26	436042.3667	BLOOD
14	68603032	68603740	esv3634815	NONE	0.305556	0.787879	0.898058	Absent	NO_DUP_NO_DEL	Platelet_count	rs2588833	2.24E+00	6.18E-33	1.860776	1.860776	5.991888	3.853646	5.786991	5.786991	196140	2659.69	472382.4	ANTHROPOMETRIC;BLOOD
2	151031127	151038285	esv3592885	NONE	0	0.020202	0	Absent	NO_DUP_NO_DEL	Peak_expiratory_flow_(PEF)	rs72855705	4.07E+00	6.25E-11	NA	NA	-0.680372	-1.29018	NA	NA	1000.85	977.517	13799.48733	RESPIRATORY
10	100688639	100702031	esv3624344	NONE	0.407407	0.0909091	0.092233	Absent	NO_DUP_NO_DEL	Pain_type(s)_experienced_in_last_month:_Headache	rs11189909	-1.07E-02	4.39E-10	1.151171	-0.218139	1.977778	0.346042	3.039021	-0.815674	26150.7	4482.86	410900.2315	OTHERS
12	23939446	23940212	esv3628853	NONE	0.185185	0.141414	0.106796	Absent	NO_DUP_NO_DEL	Pain_type(s)_experienced_in_last_month:_Back_pain	rs7977132	1.07E-02	1.10E-14	-0.731007	-0.731007	-0.550956	-0.550956	-2.742271	-2.742271	17470.7	17470.7	226769.62	OTHERS
19	48856495	48857287	esv3644585	NONE	0.00925926	0	0	Absent	NO_DUP_NO_DEL	Otitis_externa;_unspecified	rs144457270	2.81E-01	1.39E-136	3.586626	-0.026676	NA	NA	NA	NA	13968.7	678.931	40262.55178	EYE;INFLAMMATORY;NEURO;OTHERS;SKIN;TEETH
6	594995	596593	esv3607857	NONE	0.0277778	0	0	Absent	NO_DUP_NO_DEL	Other_ulcerative_colitis	rs59477170	7.34E-02	6.79E-28	1.586003	1.586003	NA	NA	NA	NA	20903	2985.04	187523.3693	CANCER;INFLAMMATORY;OTHERS
16	30916437	30924667	esv3638388	NONE	0.00925926	0	0	Absent	NO_DUP_NO_DEL	Other_other_unspecified_disorders_of_the_circulatory_system	rs201938176	1.95E+01	2.03E-44	3.643108	-0.69035	NA	NA	NA	NA	8798.68	673.87	752804.22	OTHERS
12	98956800	98963135	esv3630510	NONE	0.00925926	0	0	Absent	NO_DUP_NO_DEL	Other_melanin_hyperpigmentation	rs114074541	4.16E-01	1.31E-96	1.779303	0.475119	NA	NA	NA	NA	2763.61	923.043	13999.2055	CANCER;CARDIO;OTHERS;SKIN
1	45822649	45823485	esv3585905	NONE	0	0	0.038835	Introgressed	NO_DUP_NO_DEL	Other_enthesopathies	rs79702595	3.06E-02	3.19E-15	NA	NA	NA	NA	2.031261	-0.340307	4247.62	3086.84	164564.0343	OTHERS
5	21834195	21837538	esv3604328	NONE	0.0185185	0	0	Absent	NO_DUP_NO_DEL	Other_and_unspecified_degenerative_diseases_of_nervous_system	rs180706737	4.59E-03	1.05E-13	-0.019823	-0.167233	NA	NA	NA	NA	7786.21	7786.21	1536253.6	NEURO;OTHERS
13	55941166	55941469	esv3632157	NONE	0.273148	0.762626	0.747573	Absent	NO_DUP_NO_DEL	Oily_fish_intake	rs3124421	-1.95E-02	5.24E-16	4.390083	0.114472	8.405907	1.638743	9.059375	1.609212	9831.82	8377.48	1427385.104	OTHERS
18	11855845	11856681	esv3641817	NONE	0.115741	0	0	Absent	NO_DUP_NO_DEL	Oher_and_unspecified_postprocedural_disorders_of_eye_and_adnexa	rs73409565	2.45E-02	6.17E-32	0.716147	-0.531259	NA	NA	NA	NA	52767.9	7310.65	659320.4427	;EYE;FEMALE;OTHERS
12	2987464	2991843	esv3628325	NONE	0.00925926	0	0	Absent	NO_DUP_NO_DEL	Nonalcoholic_fatty_liver_disease	rs528302620	3.40E-01	6.07E-99	1.564056	0.504931	NA	NA	NA	NA	43437.4	2457.29	286165.2506	CARDIO;IMMUNE;METABOLISM;OTHERS;RESPIRATORY;SKIN
4	77781408	77790783	esv3601065	NONE	0.037037	0	0	Absent	NO_DUP_NO_DEL	Non-cancer_illness_code;_self-reported:_vitiligo	rs201629805	9.29E-02	4.16E-71	1.00872	0.564549	NA	NA	NA	NA	4025.61	1669.97	307960.5074	CARDIO;IMMUNE;OTHERS;RESPIRATORY
15	54890823	54893267	esv3636537	NONE	0	0.020202	0	Absent	NO_DUP_NO_DEL	Non-cancer_illness_code;_self-reported:_vitiligo	rs191633803	1.21E-03	6.76E-09	NA	NA	2.954611	-0.913069	NA	NA	1266.63	775.273	53310.78375	OTHERS
15	49544866	49547867	esv3636424	NONE	0.087963	0.207071	0.00485437	Absent	NO_DUP_NO_DEL	Non-cancer_illness_code;_self-reported:_thyroid_goitre	rs73392277	7.45E-04	1.40E-16	1.695953	0.066464	1.100582	-0.045387	2.380476	-0.347537	34377	1788.49	611918.8345	HORMONAL;OTHERS
2	136098337	136101573	esv3592575	NONE	0.259259	0	0	Absent	NO_DUP_NO_DEL	Non-cancer_illness_code;_self-reported:_scleroderma/systemic_sclerosis	rs58165671	5.29E-02	5.00E-36	1.611184	0.128724	NA	NA	NA	NA	17177.4	10363.7	339541.5747	CANCER;CARDIO;FEMALE;INFLAMMATORY;NEURO;OTHERS
6	27158546	27159910	esv3608423	NONE	0	0.010101	0.0145631	Absent	NO_DUP_NO_DEL	Non-cancer_illness_code;_self-reported:_psoriasis	rs112848996	1.32E-02	8.92E-11	NA	NA	0.120054	-0.568505	0.022982	-0.425554	5311.19	2618.95	77184.74283	OTHERS
17	41333881	41335571	esv3640621	NONE	0.0509259	0	0	Absent	NO_DUP_NO_DEL	Non-cancer_illness_code;_self-reported:_nephritis	rs34372250	4.46E-02	4.42E-32	1.895527	1.431596	NA	NA	NA	NA	62220.9	11240.7	285277.2094	;CANCER;EYE;INFLAMMATORY;OTHERS
6	32454946	32478407	esv3608584	NONE	0.847222	0.823232	0.84466	Ancient	NO_DUP_NO_DEL	Non-cancer_illness_code;_self-reported:_multiple_sclerosis	rs9269235	-4.26E-03	8.11E-105	NA	NA	NA	NA	NA	NA	79293.9	79293.9	NA	ANTHROPOMETRIC;BLOOD;DIGESTIVE;IMMUNE;INFLAMMATORY;METABOLISM;NEURO;OTHERS;RESPIRATORY;TEETH
6	32461337	32468848	esv3608585	NONE	0.847222	0.833333	0.84466	Ancient	NO_DUP_NO_DEL	Non-cancer_illness_code;_self-reported:_multiple_sclerosis	rs9269235	-4.26E-03	8.11E-105	NA	NA	NA	NA	NA	NA	79293.9	79293.9	NA	ANTHROPOMETRIC;BLOOD;DIGESTIVE;IMMUNE;INFLAMMATORY;METABOLISM;NEURO;OTHERS;RESPIRATORY;TEETH
6	31292091	31293878	esv3608555	NONE	0.759259	0.580808	0.558252	Ancient	NO_DUP_NO_DEL	Non-cancer_illness_code;_self-reported:_malabsorption/coeliac_disease	rs9265181	2.93E-03	2.60E-71	NA	NA	NA	NA	NA	NA	71282.9	66838.3	NA	ANTHROPOMETRIC;BLOOD;DIGESTIVE;IMMUNE;INFLAMMATORY;METABOLISM;OTHERS;RESPIRATORY;SKIN
6	32623533	32624604	esv3608605	NONE	0.509259	0.585859	0.587379	Ancient	DEL_OR_PARTIAL_DEL	Non-cancer_illness_code;_self-reported:_malabsorption/coeliac_disease	rs1071630	4.29E-03	1.00E-156	3.018509	2.925354	4.32489	4.32489	4.131512	4.131512	75774.8	66341.9	NA	BLOOD;DIGESTIVE;EYE;HORMONAL;IMMUNE;INFLAMMATORY;METABOLISM;NEURO;OTHERS;RESPIRATORY
6	32624896	32625863	esv3608606	NONE	0.50463	0.590909	0.587379	Ancient	DEL_OR_PARTIAL_DEL	Non-cancer_illness_code;_self-reported:_malabsorption/coeliac_disease	rs1071630	4.29E-03	1.00E-156	3.018509	2.925354	4.32489	4.32489	4.131512	4.131512	75774.8	66341.9	NA	ANTHROPOMETRIC;BLOOD;DIGESTIVE;EYE;HORMONAL;IMMUNE;INFLAMMATORY;METABOLISM;NEURO;OTHERS;RESPIRATORY;TEETH
6	32642926	32648023	esv3608607	NONE	0.268519	0.212121	0.38835	Ancient	NO_DUP_NO_DEL	Non-cancer_illness_code;_self-reported:_malabsorption/coeliac_disease	rs28891472	-3.97E-03	8.96E-102	NA	NA	NA	NA	NA	NA	72217.5	72217.5	NA	ANTHROPOMETRIC;BLOOD;DIGESTIVE;IMMUNE;INFLAMMATORY;METABOLISM;OTHERS;RESPIRATORY
6	33026721	33028605	esv3608619	NONE	0.740741	0.181818	0.626214	Absent	DEL_OR_PARTIAL_DEL	Non-cancer_illness_code;_self-reported:_malabsorption/coeliac_disease	rs17214573	6.98E-03	5.71E-143	7.459668	2.828705	12.108473	4.530472	5.335195	2.30971	64380.2	55155.8	13683815.89	BLOOD;DIGESTIVE;IMMUNE;OTHERS
6	33583080	33585984	esv3608638	NONE	0.439815	0.217172	0.470874	Absent	NO_DUP_NO_DEL	Non-cancer_illness_code;_self-reported:_malabsorption/coeliac_disease	rs407415	1.77E-03	8.82E-23	0.419091	-0.391259	2.124582	0.252178	0.737162	-0.567383	33887	9809.23	422921.6	DIGESTIVE;IMMUNE;OTHERS
6	34317077	34319589	esv3608655	NONE	0.115741	0.020202	0	Absent	NO_DUP_NO_DEL	Non-cancer_illness_code;_self-reported:_malabsorption/coeliac_disease	rs60208416	3.20E-03	6.18E-12	NA	NA	NA	NA	NA	NA	11491.1	11491.1	40571.58	ANTHROPOMETRIC;OTHERS
1	26268411	26269112	esv3585535	NONE	0.0462963	0	0	Absent	NO_DUP_NO_DEL	Non-cancer_illness_code;_self-reported:_lichen_sclerosis	rs34555067	1.26E-01	3.76E-82	0.619947	-0.814745	NA	NA	NA	NA	3441.18	1720.81	172079.7225	CANCER;MENTAL;OTHERS
6	167488092	167489637	esv3611645	NONE	0.37963	0.373737	0.38835	Ancient	NO_DUP_NO_DEL	Non-cancer_illness_code;_self-reported:_hypothyroidism/myxoedema	rs9459845	4.32E-03	6.71E-18	3.386198	0.093085	4.516678	0.484431	3.892559	0.446517	54091.6	47139.3	1783048.305	OTHERS
6	167488571	167488857	esv3611646	NONE	0.37963	0.373737	0.38835	Ancient	NO_DUP_NO_DEL	Non-cancer_illness_code;_self-reported:_hypothyroidism/myxoedema	rs9459845	4.32E-03	6.71E-18	3.386198	0.093085	4.516678	0.484431	3.892559	0.446517	54091.6	47139.3	1783048.305	OTHERS
6	167488659	167489084	esv3611647	NONE	0.37963	0.373737	0.38835	Ancient	NO_DUP_NO_DEL	Non-cancer_illness_code;_self-reported:_hypothyroidism/myxoedema	rs9459845	4.32E-03	6.71E-18	3.386198	0.093085	4.516678	0.484431	3.892559	0.446517	54091.6	47139.3	1783048.305	OTHERS
1	247186233	247187157	esv3589502	NONE	0.0601852	0	0	Absent	NO_DUP_NO_DEL	Non-cancer_illness_code;_self-reported:_gastroenteritis/dysentry	rs74155716	5.78E-02	2.66E-45	1.875967	0.739717	NA	NA	NA	NA	20546.3	2952.13	508112.7504	CANCER;EYE;FEMALE;INFLAMMATORY;NEURO;OTHERS
7	52425599	52429052	esv3613161	NONE	0	0.010101	0	Absent	NO_DUP_NO_DEL	Non-cancer_illness_code;_self-reported:_gastritis/gastric_erosions	rs560380385	5.77E-03	4.95E-09	NA	NA	-0.462146	-0.462146	NA	NA	1308.34	1308.34	16844.66	OTHERS
15	35196780	35197905	esv3636126	NONE	0.00925926	0	0	Absent	NO_DUP_NO_DEL	Non-cancer_illness_code;_self-reported:_fracture_skull_/_head	rs144662451	4.87E-01	1.25E-144	3.252328	-0.548888	NA	NA	NA	NA	7444.16	987.729	209755.56	CARDIO;FEMALE;IMMUNE;OTHERS;RESPIRATORY
1	193999047	194000246	esv3588382	NONE	0.0138889	0.00505051	0.0776699	Absent	NO_DUP_NO_DEL	Non-cancer_illness_code;_self-reported:_fracture_foot	rs12406963	5.35E-03	6.71E-11	4.970543	0.1564	4.763642	-0.514203	4.240646	-0.517137	4579.17	2559.96	769663.055	OTHERS
2	182733490	182735629	esv3593552	NONE	0.00925926	0	0	Absent	NO_DUP_NO_DEL	Non-cancer_illness_code;_self-reported:_food_intolerance	rs78894663	8.74E-02	6.64E-46	5.221593	3.841813	NA	NA	NA	NA	34166.1	7808.9	732323.4579	OTHERS
6	35332968	35334387	esv3608676	NONE	0.0555556	0	0	Absent	NO_DUP_NO_DEL	Non-cancer_illness_code;_self-reported:_chronic/degenerative_neurological_problem	rs6917127	1.53E-02	7.91E-21	1.291686	-0.319264	NA	NA	NA	NA	6164.85	3393.16	149387.238	EYE;INFLAMMATORY;OTHERS
9	20799537	20804677	esv3619943	NONE	0	0	0.0291262	Introgressed	NO_DUP_NO_DEL	Non-cancer_illness_code;_self-reported:_cholecystitis	rs17832431	3.61E-01	4.29E-82	NA	NA	NA	NA	3.227891	0.509888	13710.9	3042.67	425682.2629	INFLAMMATORY;NEURO;OTHERS;RESPIRATORY
2	242017590	242018331	esv3594817	NONE	0.00925926	0	0	Ancient	NO_DUP_NO_DEL	Non-cancer_illness_code;_self-reported:_cerebral_aneurysm	rs146796401	3.05E-02	4.22E-20	1.200705	1.200705	NA	NA	NA	NA	24259.3	8252.13	546649.0253	IMMUNE;INFLAMMATORY;NEURO;OTHERS
1	205106089	205108223	esv3588629	NONE	0.0231481	0	0	Absent	NO_DUP_NO_DEL	Non-cancer_illness_code;_self-reported:_carpal_tunnel_syndrome	rs35208779	1.59E-01	8.36E-43	3.811412	0.707121	NA	NA	NA	NA	25835.2	8468.52	1035444.838	CANCER;FEMALE;OTHERS
3	149585141	149588974	esv3598149	NONE	0	0.010101	0	Absent	NO_DUP_NO_DEL	Non-cancer_illness_code;_self-reported:_benign_neuroma	rs73155080	8.22E-04	9.43E-09	NA	NA	1.555489	-0.675269	NA	NA	1030.71	1030.71	69203.7696	OTHERS
7	133039953	133040599	esv3615068	NONE	0	0.010101	0	Absent	NO_DUP_NO_DEL	Non-cancer_illness_code;_self-reported:_benign_neuroma	rs184587898	2.39E-03	2.29E-10	NA	NA	-1.018277	-1.018277	NA	NA	329.936	265.664	NA	OTHERS
6	160648759	160655032	esv3611432	NONE	0.0462963	0	0	Absent	DEL_OR_PARTIAL_DEL	Non-cancer_illness_code;_self-reported:_bell's_palsy/facial_nerve_palsy	rs8177517	1.89E-02	1.54E-13	0.979196	-1.856079	NA	NA	NA	NA	2376.91	2376.91	NA	OTHERS
12	56031911	56034505	esv3629584	NONE	0.0509259	0	0	Absent	NO_DUP_NO_DEL	Non-butter_spread_type_details:_Hard_(block)_margarine	rs76940436	1.30E-01	1.17E-48	0.813208	0.813208	NA	NA	NA	NA	2385.29	2340.05	33692.39067	NEURO;OTHERS;SKIN
7	65316656	65317127	esv3613490	NONE	0.125	0.10101	0.160194	Absent	NO_DUP_NO_DEL	Neutrophill_percentage	rs34815098	2.22E-01	3.85E-11	2.212011	0.833497	3.386364	0.877215	3.196968	1.607931	59882.8	33392	745218.4	BLOOD
7	150300998	150306771	esv3615466	NONE	0.106481	0.227273	0.169903	Absent	NO_DUP_NO_DEL	Neutrophill_percentage	rs73161782	-1.92E-01	5.73E-16	2.094133	0.638002	9.15669	5.431873	6.685348	3.574536	43238.1	18857.4	435763.6993	BLOOD
15	86057007	86059202	esv3637116	NONE	0.333333	0.166667	0.194175	Absent	NO_DUP_NO_DEL	Neutrophill_percentage	rs67788925	-1.55E-01	3.48E-09	2.789885	-0.640389	-0.165513	-0.502941	2.669845	0.333091	16599.4	5109.63	414021.8756	BLOOD
8	87188294	87193738	esv3617904	NONE	0.101852	0.161616	0	Absent	NO_DUP_NO_DEL	Neutrophill_count	rs138382034	2.77E-02	1.19E-09	5.170355	1.966203	5.807337	1.389361	NA	NA	26829	2761.55	1355297.329	BLOOD
1	2024547	2027383	esv3585020	NONE	0.0185185	0	0	Recurrent	NO_DUP_NO_DEL	NA	NA	NA	NA	0.517148	0.517148	NA	NA	NA	NA	2613.8	2613.8	NA	NONE
1	5165240	5166206	esv3585085	NONE	0.037037	0	0	Absent	NO_DUP_NO_DEL	NA	NA	NA	NA	1.087878	1.087878	NA	NA	NA	NA	3451.4	1727.26	NA	NONE
1	5302073	5304597	esv3585089	NONE	0.00925926	0	0	Absent	NO_DUP_NO_DEL	NA	NA	NA	NA	-0.094283	-0.094283	NA	NA	NA	NA	2390.12	2390.12	NA	NONE
1	6458634	6459611	esv3585107	NONE	0.0740741	0	0	Absent	NO_DUP_NO_DEL	NA	NA	NA	NA	0.627554	0.474655	NA	NA	NA	NA	15124.3	11379.8	320440.61	NONE
1	7803121	7804431	esv3585130	NONE	0.00925926	0	0	Absent	NO_DUP_NO_DEL	NA	NA	NA	NA	1.983213	1.091828	NA	NA	NA	NA	1445.29	1015.94	NA	NONE
1	8182402	8190870	esv3585139	NONE	0.0416667	0	0	Absent	NO_DUP_NO_DEL	NA	NA	NA	NA	1.57757	-0.192213	NA	NA	NA	NA	28051.7	10747.5	751176.615	NONE
1	8247757	8250067	esv3585142	NONE	0.037037	0	0	Absent	NO_DUP_NO_DEL	NA	NA	NA	NA	1.141144	1.141144	NA	NA	NA	NA	31511	31511	22599.06133	NONE
1	8550232	8551315	esv3585149	NONE	0.180556	0	0	Absent	NO_DUP_NO_DEL	NA	NA	NA	NA	1.839662	-0.77986	NA	NA	NA	NA	41515.4	20298.4	321587.105	NONE
1	9595360	9597869	esv3585179	NONE	0.347222	0.126263	0.286408	Ancient	NO_DUP_NO_DEL	NA	NA	NA	NA	0.265591	0.265591	1.098802	1.098802	1.854578	1.854578	37623.3	37623.3	812692.3	NONE
1	10249536	10252077	esv3585197	NONE	0.037037	0	0	Absent	DEL_OR_PARTIAL_DEL	NA	NA	NA	NA	1.845007	1.472054	NA	NA	NA	NA	3409.19	2276.72	64207.28533	NONE
1	10369423	10378616	esv3585199	NONE	0.12963	0	0	Absent	NO_DUP_NO_DEL	NA	NA	NA	NA	1.610626	-0.613061	NA	NA	NA	NA	16206.6	12276.6	233274.4724	NONE
1	10543545	10545992	esv3585201	NONE	0.0277778	0	0	Absent	NO_DUP_NO_DEL	NA	NA	NA	NA	1.008315	1.008315	NA	NA	NA	NA	27678.7	19556.2	379917.664	NONE
1	11060112	11062310	esv3585211	NONE	0.12963	0	0.00485437	Absent	NO_DUP_NO_DEL	NA	NA	NA	NA	0.546403	-0.736596	NA	NA	NA	NA	6739.54	4994.27	829360.3733	NONE
1	11230358	11232287	esv3585215	NONE	0.00925926	0	0	Absent	NO_DUP_NO_DEL	NA	NA	NA	NA	2.25989	0.535408	NA	NA	NA	NA	11241	5660.61	316246.6618	NONE
1	11682873	11683189	esv3585224	NONE	0.333333	0.782828	0.398058	Ancient	NO_DUP_NO_DEL	NA	NA	NA	NA	-0.240823	-0.240823	-0.91461	-0.91461	-0.275066	-0.275066	33353.1	31868.5	NA	NONE
1	12743419	12746634	esv3585238	NONE	0.0787037	0	0	Absent	NO_DUP_NO_DEL	NA	NA	NA	NA	0.613163	0.613163	NA	NA	NA	NA	3803.48	3803.48	NA	NONE
1	12842004	12846594	esv3585240	NONE	0	0.040404	0.038835	Introgressed	NO_DUP_NO_DEL	NA	NA	NA	NA	NA	NA	1.546711	1.546711	0.455027	-0.764182	65956.9	44533.3	NA	NONE
1	14163092	14167002	esv3585266	NONE	0.115741	0	0	Recurrent	NO_DUP_NO_DEL	NA	NA	NA	NA	0.036427	0.036427	NA	NA	NA	NA	9938.66	9938.66	309948.8	NONE
1	14437074	14438948	esv3585274	NONE	0.347222	0.287879	0.529126	Ancient	NO_DUP_NO_DEL	NA	NA	NA	NA	3.630315	0.629206	10.783303	0.418879	7.850814	0.70918	50234.9	27641.9	1899716.133	NONE
1	14437868	14438136	esv3585275	NONE	0.347222	0.287879	0.529126	Ancient	NO_DUP_NO_DEL	NA	NA	NA	NA	3.630315	0.629206	10.783303	0.418879	7.850814	0.70918	50234.9	27641.9	1899716.133	NONE
1	15326657	15327606	esv3585298	NONE	0.0416667	0	0	Absent	NO_DUP_NO_DEL	NA	NA	NA	NA	2.328409	2.328409	NA	NA	NA	NA	4462.66	4462.66	61186.902	NONE
1	15343948	15344881	esv3585300	NONE	0	0	0.00970874	Absent	NO_DUP_NO_DEL	NA	NA	NA	NA	NA	NA	NA	NA	0.28126	0.28126	132.43	132.43	NA	NONE
1	15557847	15558602	esv3585306	NONE	0.0324074	0	0	Absent	NO_DUP_NO_DEL	NA	NA	NA	NA	0.603015	0.603015	NA	NA	NA	NA	10472	10472	227935.134	NONE
1	15935139	15938228	esv3585315	NONE	0.0185185	0	0	Absent	NO_DUP_NO_DEL	NA	NA	NA	NA	1.414548	-0.251397	NA	NA	NA	NA	2755.2	2439.58	NA	NONE
1	16429786	16435215	esv3585331	NONE	0.0787037	0	0	Absent	NO_DUP_NO_DEL	NA	NA	NA	NA	-0.393308	-0.393308	NA	NA	NA	NA	2546.59	2546.59	281452.92	NONE
1	17641948	17642976	esv3585365	NONE	0.0231481	0	0	Absent	NO_DUP_NO_DEL	NA	NA	NA	NA	5.113294	0.624833	NA	NA	NA	NA	46181.1	46181.1	763516.9647	NONE
1	20407144	20410753	esv3585413	NONE	0.0601852	0	0	Absent	NO_DUP_NO_DEL	NA	NA	NA	NA	-0.87091	-0.954617	NA	NA	NA	NA	2291.53	1931.47	NA	NONE
1	20497183	20497735	esv3585416	NONE	0.273148	0.212121	0.145631	Absent	NO_DUP_NO_DEL	NA	NA	NA	NA	1.459589	1.459589	1.433772	0.317151	0.41598	-0.884733	21873.7	20013	418747.42	NONE
1	20864015	20864732	esv3585423	NONE	0	0.116162	0.0776699	Absent	NO_DUP_NO_DEL	NA	NA	NA	NA	NA	NA	2.52107	1.623603	1.176576	-1.568092	1955.87	1955.87	123616.1733	NONE
1	22499759	22509308	esv3585464	NONE	0.0231481	0	0	Absent	NO_DUP_NO_DEL	NA	NA	NA	NA	-0.439313	-0.439313	NA	NA	NA	NA	10365.7	10365.7	12852.07	NONE
1	24895774	24900871	esv3585506	NONE	0.134259	0	0	Ancient	NO_DUP_NO_DEL	NA	NA	NA	NA	4.134286	3.729502	NA	NA	NA	NA	21813.8	16881.9	591405.2813	NONE
1	25055152	25061253	esv3585511	NONE	0	0	0.00970874	Absent	NO_DUP_NO_DEL	NA	NA	NA	NA	NA	NA	NA	NA	-0.738299	-0.738299	191.752	191.752	6243.874	NONE
1	25178181	25184721	esv3585515	NONE	0	0.010101	0	Absent	NO_DUP_NO_DEL	NA	NA	NA	NA	NA	NA	NA	NA	NA	NA	720.515	720.515	42669.466	NONE
1	26961278	26963544	esv3585544	NONE	0.037037	0	0.092233	Absent	NO_DUP_NO_DEL	NA	NA	NA	NA	0.871677	-6.598048	NA	NA	1.83035	-19.415972	18951.2	15928.3	320986.6178	NONE
1	28551353	28554072	esv3585575	NONE	0.0231481	0.0454545	0	Absent	NO_DUP_NO_DEL	NA	NA	NA	NA	0.398321	0.398321	0.795162	0.795162	NA	NA	6559.87	6559.87	75387.62	NONE
1	29304451	29306212	esv3585596	NONE	0.0787037	0	0	Absent	NO_DUP_NO_DEL	NA	NA	NA	NA	-0.229815	-0.229815	NA	NA	NA	NA	3131.73	3131.73	92346.03	NONE
1	31574934	31577199	esv3585642	NONE	0	0.0151515	0	Absent	NO_DUP_NO_DEL	NA	NA	NA	NA	NA	NA	-0.63705	-0.63705	NA	NA	371.261	371.261	9176.132	NONE
1	31720009	31722557	esv3585644	NONE	0	0	0.0582524	Absent	NO_DUP_NO_DEL	NA	NA	NA	NA	NA	NA	NA	NA	-0.327731	-0.327731	1239.78	1239.78	398006.84	NONE
1	33049926	33056997	esv3585672	NONE	0.0138889	0	0	Ancient	NO_DUP_NO_DEL	NA	NA	NA	NA	6.062903	0.334896	NA	NA	NA	NA	26662.3	12737.2	1571835.08	NONE
1	33102049	33102922	esv3585674	NONE	0.0138889	0	0	Absent	NO_DUP_NO_DEL	NA	NA	NA	NA	1.289344	-0.140966	NA	NA	NA	NA	2951.23	1388.01	6860.588	NONE
1	33418209	33421166	esv3585679	NONE	0	0.020202	0	Absent	NO_DUP_NO_DEL	NA	NA	NA	NA	NA	NA	-0.660278	-0.685412	NA	NA	693.556	693.556	5697.356	NONE
1	34028753	34029762	esv3585691	NONE	0.0138889	0	0	Absent	NO_DUP_NO_DEL	NA	NA	NA	NA	-0.091957	-0.091957	NA	NA	NA	NA	1205.69	1205.69	207569.32	NONE
1	35627104	35627431	esv3585717	NONE	0.490741	0.883838	0.368932	Ancient	NO_DUP_NO_DEL	NA	NA	NA	NA	1.775892	1.233884	4.244648	2.420154	3.576815	3.576815	35491.2	35491.2	1052518.289	NONE
1	36733282	36733515	esv3585731	NONE	0.555556	0.868687	0.951456	Absent	NO_DUP_NO_DEL	NA	NA	NA	NA	2.217312	2.217312	11.329415	11.329415	10.315296	10.315296	60197.3	60082.3	688148.6	NONE
1	37521869	37522704	esv3585744	NONE	0.00925926	0	0	Absent	NO_DUP_NO_DEL	NA	NA	NA	NA	0.060965	0.060965	NA	NA	NA	NA	940.551	940.551	NA	NONE
1	37816478	37816722	esv3585748	NONE	0.12963	0.555556	0.271845	Absent	NO_DUP_NO_DEL	NA	NA	NA	NA	0.379831	-0.596427	0.447149	-0.195449	-0.214222	-0.592234	21858	21858	400196.1708	NONE
1	38602522	38604793	esv3585763	NONE	0	0.040404	0	Absent	NO_DUP_NO_DEL	NA	NA	NA	NA	NA	NA	-0.188426	-0.240225	NA	NA	781.984	693.998	43859.396	NONE
1	38642131	38645112	esv3585764	NONE	0.0185185	0	0	Absent	NO_DUP_NO_DEL	NA	NA	NA	NA	0.433409	0.433409	NA	NA	NA	NA	1156.28	1156.28	25593.54	NONE
1	39084231	39085822	esv3585768	NONE	0.0231481	0.030303	0.184466	Absent	NO_DUP_NO_DEL	NA	NA	NA	NA	0.519704	0.519704	-1.318711	-1.318711	-1.662786	-1.662786	7443.33	7443.33	NA	NONE
1	39433022	39440878	esv3585777	NONE	0.0185185	0	0	Absent	NO_DUP_NO_DEL	NA	NA	NA	NA	2.237398	0.193435	NA	NA	NA	NA	2321.25	996.998	319450.7452	NONE
1	39561555	39562136	esv3585783	NONE	0.0185185	0	0	Absent	NO_DUP_NO_DEL	NA	NA	NA	NA	1.416136	1.416136	NA	NA	NA	NA	760.989	751.058	21768.229	NONE
1	39998246	40001288	esv3585790	NONE	0.282407	0.010101	0	Absent	NO_DUP_NO_DEL	NA	NA	NA	NA	1.404988	0.017775	4.975755	-1.210009	NA	NA	60149	5240.72	110611.62	NONE
1	40575439	40587374	esv3585799	NONE	0.0185185	0	0	Absent	NO_DUP_NO_DEL	NA	NA	NA	NA	-0.421412	-0.421412	NA	NA	NA	NA	1262.74	1262.74	14572.18	NONE
1	41021684	41028600	esv3585809	NONE	0.0601852	0.0505051	0.0291262	Absent	NO_DUP_NO_DEL	NA	NA	NA	NA	1.763895	0.607553	1.154923	0.451315	1.931386	-0.033636	14530.2	6152.21	111585.6	NONE
1	41571633	41573249	esv3585820	NONE	0.037037	0	0	Absent	NO_DUP_NO_DEL	NA	NA	NA	NA	4.501229	2.106589	NA	NA	NA	NA	2383.05	1938.71	NA	NONE
1	41743816	41744510	esv3585822	NONE	0.236111	0	0	Absent	NO_DUP_NO_DEL	NA	NA	NA	NA	-0.433972	-0.433972	NA	NA	NA	NA	39915.6	39915.6	257240.2	NONE
1	42071681	42072604	esv3585828	NONE	0.0462963	0	0	Absent	NO_DUP_NO_DEL	NA	NA	NA	NA	2.902565	0.111126	NA	NA	NA	NA	43437.4	6305.85	936867.7104	NONE
1	42144091	42144415	esv3585829	NONE	0.0277778	0	0	Absent	NO_DUP_NO_DEL	NA	NA	NA	NA	2.840234	1.400628	NA	NA	NA	NA	32632.6	2318.36	533436.2483	NONE
1	42648650	42652851	esv3585840	NONE	0.0138889	0	0	Absent	NO_DUP_NO_DEL	NA	NA	NA	NA	-0.427371	-0.427371	NA	NA	NA	NA	813.169	813.169	23260.328	NONE
1	43385223	43386566	esv3585859	NONE	0.0509259	0	0	Absent	NO_DUP_NO_DEL	NA	NA	NA	NA	1.377088	-0.040667	NA	NA	NA	NA	17057.8	16130.9	159038.9612	NONE
1	43694061	43695545	esv3585864	NONE	0.148148	0.0505051	0.184466	Absent	NO_DUP_NO_DEL	NA	NA	NA	NA	0.079579	0.079579	0.554408	0.554408	0.335365	0.335365	20205.8	20205.8	305271.96	NONE
1	45021223	45022311	esv3585888	NONE	0.12037	0	0.140777	Absent	NO_DUP_NO_DEL	NA	NA	NA	NA	1.932244	0.582015	NA	NA	1.142552	0.121448	39352.1	39352.1	643042.82	NONE
1	45629855	45647397	esv3585900	NONE	0	0.010101	0	Absent	NO_DUP_NO_DEL	NA	NA	NA	NA	NA	NA	-2.213136	-2.213136	NA	NA	512.403	512.403	NA	NONE
1	45708588	45709251	esv3585902	NONE	0.0601852	0	0	Absent	NO_DUP_NO_DEL	NA	NA	NA	NA	1.523273	0.950356	NA	NA	NA	NA	28152.9	24240.5	549145.52	NONE
1	46287087	46288448	esv3585918	NONE	0.0138889	0	0	Absent	NO_DUP_NO_DEL	NA	NA	NA	NA	1.241249	-0.72705	NA	NA	NA	NA	4932.51	4772.49	54440.54	NONE
1	48352571	48353250	esv3585961	NONE	0	0	0.0145631	Absent	NO_DUP_NO_DEL	NA	NA	NA	NA	NA	NA	NA	NA	-1.000258	-1.000258	788.076	788.076	NA	NONE
1	48722098	48723666	esv3585964	NONE	0.0694444	0	0	Absent	NO_DUP_NO_DEL	NA	NA	NA	NA	4.888847	-0.396204	NA	NA	NA	NA	20306.8	9950.79	301195.6407	NONE
1	49068909	49069541	esv3585973	NONE	0	0	0.00970874	Absent	NO_DUP_NO_DEL	NA	NA	NA	NA	NA	NA	NA	NA	1.249192	1.249192	757.874	757.874	NA	NONE
1	49535079	49537571	esv3585986	NONE	0.0185185	0	0	Absent	NO_DUP_NO_DEL	NA	NA	NA	NA	-0.657095	-0.689764	NA	NA	NA	NA	1888.8	1883.26	31782.569	NONE
1	50021162	50029568	esv3585999	NONE	0	0.0151515	0	Absent	NO_DUP_NO_DEL	NA	NA	NA	NA	NA	NA	-0.793363	-2.435501	NA	NA	662.886	662.886	9967.72	NONE
1	51102445	51103491	esv3586021	NONE	0	0	0.0436893	Absent	NO_DUP_NO_DEL	NA	NA	NA	NA	NA	NA	NA	NA	-1.653235	-1.653235	884.427	884.427	29535.184	NONE
1	51128231	51130313	esv3586022	NONE	0.0324074	0	0	Absent	NO_DUP_NO_DEL	NA	NA	NA	NA	1.128012	1.128012	NA	NA	NA	NA	24597.8	5617.63	64588.93	NONE
1	51915145	51917455	esv3586035	NONE	0.0185185	0	0	Absent	NO_DUP_NO_DEL	NA	NA	NA	NA	5.355097	5.355097	NA	NA	NA	NA	2918.61	2918.61	153889.1235	NONE
1	53594104	53594942	esv3586062	NONE	0.217593	0.237374	0.247573	Absent	NO_DUP_NO_DEL	NA	NA	NA	NA	0.676592	0.676592	0.269269	0.269269	0.530032	0.530032	2298.72	2298.72	441310.8	NONE
1	53594175	53595598	esv3586063	NONE	0.217593	0.237374	0.247573	Absent	NO_DUP_NO_DEL	NA	NA	NA	NA	0.676592	0.676592	0.269269	0.269269	0.530032	0.530032	2298.72	2298.72	441310.8	NONE
1	53595112	53595602	esv3586064	NONE	0.217593	0.237374	0.247573	Absent	NO_DUP_NO_DEL	NA	NA	NA	NA	0.676592	0.676592	0.269269	0.269269	0.530032	0.530032	2298.72	2298.72	441310.8	NONE
1	53933585	53933942	esv3586068	NONE	0	0.0252525	0	Absent	NO_DUP_NO_DEL	NA	NA	NA	NA	NA	NA	-0.762159	-0.762159	NA	NA	721.055	721.055	NA	NONE
1	54351275	54353398	esv3586078	NONE	0.0277778	0	0	Absent	NO_DUP_NO_DEL	NA	NA	NA	NA	1.238648	0.508855	NA	NA	NA	NA	12189.5	6936.23	86958.704	NONE
1	54367603	54369751	esv3586079	NONE	0.037037	0	0	Absent	NO_DUP_NO_DEL	NA	NA	NA	NA	1.05905	1.05905	NA	NA	NA	NA	9770.7	9770.7	21377.58	NONE
1	54611874	54615207	esv3586084	NONE	0.0416667	0	0	Absent	NO_DUP_NO_DEL	NA	NA	NA	NA	1.232036	-0.387189	NA	NA	NA	NA	7153.52	7153.52	294398.8297	NONE
1	54894007	54897603	esv3586089	NONE	0	0.0151515	0	Absent	NO_DUP_NO_DEL	NA	NA	NA	NA	NA	NA	0.526209	-0.791071	NA	NA	450.822	450.822	NA	NONE
1	55092043	55096006	esv3586099	NONE	0.0740741	0.292929	0.334951	Absent	NO_DUP_NO_DEL	NA	NA	NA	NA	5.612439	0.497867	6.230395	0.502424	6.340823	0.787833	25006.1	20765.5	1439542.417	NONE
1	55300973	55305530	esv3586102	NONE	0.0231481	0	0	Absent	NO_DUP_NO_DEL	NA	NA	NA	NA	0.646255	-0.156382	NA	NA	NA	NA	3219.47	628.483	NA	NONE
1	55363923	55369186	esv3586106	NONE	0.0324074	0	0	Absent	NO_DUP_NO_DEL	NA	NA	NA	NA	-0.554348	-0.554348	NA	NA	NA	NA	13000.4	12545.9	508264.4	NONE
1	55851980	55855453	esv3586111	NONE	0.0555556	0	0	Absent	NO_DUP_NO_DEL	NA	NA	NA	NA	1.675722	-0.380893	NA	NA	NA	NA	16638.1	3298.22	147659.1431	NONE
1	55927718	55929231	esv3586112	NONE	0.0185185	0.0151515	0.0582524	Ancient	NO_DUP_NO_DEL	NA	NA	NA	NA	2.106568	2.106568	2.869659	2.869659	2.582168	2.582168	18516.6	4593.41	474136.0089	NONE
1	58647370	58649137	esv3586156	NONE	0.0324074	0	0	Absent	NO_DUP_NO_DEL	NA	NA	NA	NA	1.54124	-0.59745	NA	NA	NA	NA	21977.7	11097.7	440285.9825	NONE
1	58743910	58744826	esv3586159	NONE	0.898148	0.924242	0.927184	Ancient	NO_DUP_NO_DEL	NA	NA	NA	NA	0.731071	0.731071	-0.215202	-0.215202	-0.214133	-0.214133	43001.5	35849.1	1552885.6	NONE
1	59845688	59846512	esv3586181	NONE	0.0787037	0	0	Absent	NO_DUP_NO_DEL	NA	NA	NA	NA	0.844571	0.844571	NA	NA	NA	NA	16380.9	16380.9	130383.806	NONE
1	60043095	60047811	esv3586185	NONE	0.0138889	0	0	Absent	NO_DUP_NO_DEL	NA	NA	NA	NA	4.398752	0.897045	NA	NA	NA	NA	38713.9	14681.1	303482.1853	NONE
1	60046725	60050638	esv3586186	NONE	0.125	0.0151515	0.00970874	Absent	NO_DUP_NO_DEL	NA	NA	NA	NA	2.48498	1.583354	3.246759	2.60355	4.335315	3.553992	32036.7	12257.2	607038.5125	NONE
1	60048628	60049655	esv3586187	NONE	0.273148	0.166667	0.174757	Ancient	NO_DUP_NO_DEL	NA	NA	NA	NA	0.3465	0.14909	3.018582	1.463828	3.497206	1.869272	49642.6	42190.5	934064.6	NONE
1	60487912	60488512	esv3586198	NONE	0	0	0.00970874	Absent	NO_DUP_NO_DEL	NA	NA	NA	NA	NA	NA	NA	NA	-0.69008	-0.69008	798.961	798.961	38852.044	NONE
1	62082822	62083701	esv3586218	NONE	0.62963	0.353535	0.218447	Ancient	NO_DUP_NO_DEL	NA	NA	NA	NA	1.568286	0.603599	3.271885	0.992045	3.800523	1.107678	41064.6	34418	1214965.36	NONE
1	62113386	62119528	esv3586219	NONE	0.00462963	0.156566	0.179612	Absent	NO_DUP_NO_DEL	NA	NA	NA	NA	0.210014	0.210014	0.327323	0.327323	0.199562	0.199562	12922.5	12922.5	268132.62	NONE
1	62622902	62624303	esv3586231	NONE	0.00462963	0.0909091	0	Absent	NO_DUP_NO_DEL	NA	NA	NA	NA	0.564932	0.564932	-0.189361	-0.189361	NA	NA	2075.66	1792.81	354495.1667	NONE
1	62654739	62657162	esv3586232	NONE	0	0.040404	0.354369	Absent	NO_DUP_NO_DEL	NA	NA	NA	NA	NA	NA	3.395404	3.395404	-0.142446	-0.142446	1537.08	1537.08	104367.06	NONE
1	62765360	62770786	esv3586233	NONE	0	0.010101	0	Absent	NO_DUP_NO_DEL	NA	NA	NA	NA	NA	NA	0.473414	0.473414	NA	NA	534.938	534.938	NA	NONE
1	63614619	63615963	esv3586243	NONE	0.0555556	0	0	Absent	NO_DUP_NO_DEL	NA	NA	NA	NA	0.952762	0.868381	NA	NA	NA	NA	1455.01	1263.58	91780.36	NONE
1	64839750	64851343	esv3586259	NONE	0.138889	0	0	Absent	NO_DUP_NO_DEL	NA	NA	NA	NA	5.14063	5.107348	NA	NA	NA	NA	11703.5	3115.89	160651.519	NONE
1	66040926	66043885	esv3586286	NONE	0.0555556	0	0	Absent	NO_DUP_NO_DEL	NA	NA	NA	NA	0.777737	0.605571	NA	NA	NA	NA	5079.56	4056.74	673937.18	NONE
1	69020016	69021218	esv3586323	NONE	0.0138889	0	0	Absent	NO_DUP_NO_DEL	NA	NA	NA	NA	3.171894	0.753174	NA	NA	NA	NA	14740.7	751.412	276731.6067	NONE
1	69073832	69075051	esv3586324	NONE	0.00925926	0	0	Absent	NO_DUP_NO_DEL	NA	NA	NA	NA	3.206717	1.38382	NA	NA	NA	NA	6957.99	4801.94	427069.5489	NONE
1	69479743	69480631	esv3586327	NONE	0.037037	0	0	Absent	NO_DUP_NO_DEL	NA	NA	NA	NA	2.196308	-0.745557	NA	NA	NA	NA	13903.8	1298.3	63731.612	NONE
1	69996359	70002732	esv3586332	NONE	0.0277778	0	0	Absent	NO_DUP_NO_DEL	NA	NA	NA	NA	0.404829	-0.354365	NA	NA	NA	NA	9941.69	6509.34	103583.076	NONE
1	71237361	71240331	esv3586363	NONE	0.12037	0.040404	0.00485437	Absent	NO_DUP_NO_DEL	NA	NA	NA	NA	1.210633	-0.821055	2.254633	-1.516019	1.990031	-1.789386	58344.6	3930.69	447794.6288	NONE
1	71244098	71249596	esv3586364	NONE	0	0.010101	0	Absent	NO_DUP_NO_DEL	NA	NA	NA	NA	NA	NA	-0.648283	-0.648283	NA	NA	504.735	504.735	10146.682	NONE
1	71487188	71489783	esv3586371	NONE	0.0277778	0	0	Absent	NO_DUP_NO_DEL	NA	NA	NA	NA	2.525577	1.289813	NA	NA	NA	NA	29829.3	9107.82	614059.9672	NONE
1	72449620	72450027	esv3586393	NONE	0.0509259	0.176768	0.485437	Absent	NO_DUP_NO_DEL	NA	NA	NA	NA	3.065943	0.364037	2.138534	0.450089	2.368527	0.659073	17748.4	2423.61	437960.8408	NONE
1	74312425	74312678	esv3586443	NONE	0.236111	0.363636	0.563107	Absent	NO_DUP_NO_DEL	NA	NA	NA	NA	0.423047	0.423047	1.431	1.431	1.632285	1.632285	21644	21644	201558	NONE
1	74432323	74435267	esv3586448	NONE	0.0231481	0	0	Absent	NO_DUP_NO_DEL	NA	NA	NA	NA	3.729278	1.67914	NA	NA	NA	NA	20610.7	20610.7	498587.88	NONE
1	76133952	76135001	esv3586489	NONE	0.0648148	0.00505051	0	Absent	NO_DUP_NO_DEL	NA	NA	NA	NA	2.561682	0.122118	3.055353	-0.262668	NA	NA	3842.79	3183.27	407087.94	NONE
1	76900598	76903357	esv3586497	NONE	0	0	0.0242718	Absent	NO_DUP_NO_DEL	NA	NA	NA	NA	NA	NA	NA	NA	NA	NA	729.497	729.497	24271.73	NONE
1	77774504	77781600	esv3586520	NONE	0.0138889	0	0	Absent	NO_DUP_NO_DEL	NA	NA	NA	NA	1.195662	0.637644	NA	NA	NA	NA	3533.86	1604.33	NA	NONE
1	78649157	78654148	esv3586536	NONE	0.152778	0.0707071	0	Absent	NO_DUP_NO_DEL	NA	NA	NA	NA	1.684565	0.264066	3.136532	1.665675	NA	NA	13211.8	12544.9	533268.932	NONE
1	79365463	79365811	esv3586563	NONE	0.00925926	0	0	Absent	NO_DUP_NO_DEL	NA	NA	NA	NA	2.984959	-0.713298	NA	NA	NA	NA	4224.6	252.148	NA	NONE
1	79393604	79399527	esv3586564	NONE	0.0740741	0.00505051	0	Absent	NO_DUP_NO_DEL	NA	NA	NA	NA	1.95272	0.461834	1.568235	0.471114	NA	NA	32572.1	6020.65	542879.4948	NONE
1	79514337	79514819	esv3586569	NONE	0.00925926	0	0	Absent	NO_DUP_NO_DEL	NA	NA	NA	NA	2.370123	-0.112904	NA	NA	NA	NA	1943.17	1766.52	199141.0655	NONE
1	80116488	80117280	esv3586581	NONE	0.0555556	0	0	Absent	NO_DUP_NO_DEL	NA	NA	NA	NA	8.197944	1.360533	NA	NA	NA	NA	32091.8	8680.96	2793671.133	NONE
1	80219618	80221295	esv3586583	NONE	0.0277778	0	0	Absent	NO_DUP_NO_DEL	NA	NA	NA	NA	0.200793	0.200793	NA	NA	NA	NA	3907.88	3733.51	211840.454	NONE
1	80221781	80223032	esv3586584	NONE	0.175926	0.484848	0.446602	Ancient	NO_DUP_NO_DEL	NA	NA	NA	NA	0.566298	0.566298	0.016605	0.016605	-0.199848	-0.199848	50481.9	50481.9	628867.4	NONE
1	81422415	81424642	esv3586607	NONE	0.0787037	0	0.0194175	Ancient	NO_DUP_NO_DEL	NA	NA	NA	NA	4.684434	2.319482	NA	NA	7.686544	4.142636	33410.5	32020.7	NA	NONE
1	84388330	84388946	esv3586656	NONE	0.101852	0.0353535	0.00485437	Absent	NO_DUP_NO_DEL	NA	NA	NA	NA	3.784835	-0.481898	4.792313	-1.287303	7.448195	-1.085302	39337.9	6000.49	965322.3905	NONE
1	84712009	84715872	esv3586662	NONE	0.296296	0.0505051	0.349515	Absent	NO_DUP_NO_DEL	NA	NA	NA	NA	0.483304	-0.446771	1.837408	-0.823686	2.73971	-0.745719	24981.8	22028.3	392790.02	NONE
1	84882972	84884736	esv3586665	NONE	0.0277778	0	0	Absent	NO_DUP_NO_DEL	NA	NA	NA	NA	1.129422	0.055525	NA	NA	NA	NA	8037.7	8037.7	NA	NONE
1	86400829	86404534	esv3586692	NONE	0.0833333	0.106061	0.194175	Ancient	NO_DUP_NO_DEL	NA	NA	NA	NA	1.88599	1.88599	2.519474	1.139476	2.806073	2.806073	38528.7	2920.64	413854.09	NONE
1	86994125	86994526	esv3586699	NONE	0.0509259	0	0	Absent	NO_DUP_NO_DEL	NA	NA	NA	NA	3.872466	0.463959	NA	NA	NA	NA	2151.39	1941.07	6026.65	NONE
1	87523395	87524655	esv3586712	NONE	0.037037	0	0	Absent	NO_DUP_NO_DEL	NA	NA	NA	NA	0.688861	-0.294889	NA	NA	NA	NA	2235.82	2235.82	31680.53467	NONE
1	89094521	89095354	esv3586739	NONE	0.0601852	0.0353535	0.0873786	Absent	NO_DUP_NO_DEL	NA	NA	NA	NA	1.099237	-0.018732	1.738738	1.738738	1.434773	1.434773	16103.7	7292.24	168885.2463	NONE
1	89811425	89812284	esv3586762	NONE	0.0694444	0.131313	0	Absent	DEL_OR_PARTIAL_DEL	NA	NA	NA	NA	NA	NA	NA	NA	NA	NA	7041.99	2019.54	NA	NONE
1	90169024	90174196	esv3586771	NONE	0.0231481	0	0	Absent	NO_DUP_NO_DEL	NA	NA	NA	NA	-0.166747	-0.166747	NA	NA	NA	NA	1278.23	1278.23	53140.92	NONE
1	92383248	92384147	esv3586799	NONE	0.0231481	0	0	Absent	NO_DUP_NO_DEL	NA	NA	NA	NA	2.115336	2.115336	NA	NA	NA	NA	2994.15	2012.95	NA	NONE
1	92579191	92585021	esv3586804	NONE	0.0231481	0	0	Absent	NO_DUP_NO_DEL	NA	NA	NA	NA	2.372389	0.631002	NA	NA	NA	NA	7317.54	5918.25	133387.513	NONE
1	93184649	93186054	esv3586816	NONE	0.0277778	0	0	Absent	NO_DUP_NO_DEL	NA	NA	NA	NA	1.052519	0.01278	NA	NA	NA	NA	1747.43	1747.43	29993.278	NONE
1	93357476	93361554	esv3586822	NONE	0.0185185	0	0	Absent	NO_DUP_NO_DEL	NA	NA	NA	NA	2.681687	0.023528	NA	NA	NA	NA	28201.4	3435.36	422177.08	NONE
1	94288372	94291260	esv3586832	NONE	0.0324074	0.338384	0.553398	Absent	NO_DUP_NO_DEL	NA	NA	NA	NA	0.701711	-0.142056	2.355317	-0.788931	2.78931	-0.042449	10399.4	5194.73	388768.2225	NONE
1	95522242	95526087	esv3586846	NONE	0	0	0.101942	Absent	NO_DUP_NO_DEL	NA	NA	NA	NA	NA	NA	NA	NA	6.964243	-0.184819	1693.98	1693.98	35234.64933	NONE
1	96996364	96997214	esv3586868	NONE	0.0462963	0	0	Absent	NO_DUP_NO_DEL	NA	NA	NA	NA	2.232806	0.018255	NA	NA	NA	NA	4826.22	4661.25	189029.75	NONE
1	98973787	98975234	esv3586903	NONE	0	0.010101	0	Absent	NO_DUP_NO_DEL	NA	NA	NA	NA	NA	NA	0.7919	0.7919	NA	NA	191.64	191.64	NA	NONE
1	99890888	99891651	esv3586923	NONE	0.125	0	0	Absent	NO_DUP_NO_DEL	NA	NA	NA	NA	2.580159	-0.4446	NA	NA	NA	NA	27230.5	18368.4	286357.86	NONE
1	101037986	101039681	esv3586945	NONE	0.0416667	0	0	Absent	NO_DUP_NO_DEL	NA	NA	NA	NA	1.168859	0.238163	NA	NA	NA	NA	4160.01	2708.79	270509.5307	NONE
1	101119949	101122359	esv3586949	NONE	0.106481	0	0	Absent	NO_DUP_NO_DEL	NA	NA	NA	NA	5.783121	-0.092493	NA	NA	NA	NA	25655.4	21708.9	1128018.293	NONE
1	101979071	101986917	esv3586973	NONE	0.00925926	0	0	Absent	NO_DUP_NO_DEL	NA	NA	NA	NA	0.092232	0.092232	NA	NA	NA	NA	394.886	394.886	NA	NONE
1	102096674	102098787	esv3586975	NONE	0.0231481	0	0	Absent	NO_DUP_NO_DEL	NA	NA	NA	NA	8.114132	1.365919	NA	NA	NA	NA	48997.4	12697.1	182014.175	NONE
1	102097881	102098558	esv3586976	NONE	0.0231481	0	0	Absent	NO_DUP_NO_DEL	NA	NA	NA	NA	8.114132	1.365919	NA	NA	NA	NA	48997.4	12697.1	182014.175	NONE
1	102321436	102326963	esv3586980	NONE	0.00925926	0	0	Absent	NO_DUP_NO_DEL	NA	NA	NA	NA	0.378304	-0.294309	NA	NA	NA	NA	15254.4	8409.82	NA	NONE
1	102325353	102327002	esv3586981	NONE	0.00925926	0	0	Absent	NO_DUP_NO_DEL	NA	NA	NA	NA	0.378304	-0.294309	NA	NA	NA	NA	15254.4	8409.82	NA	NONE
1	102983325	102984827	esv3586994	NONE	0.180556	0	0	Absent	NO_DUP_NO_DEL	NA	NA	NA	NA	0.645411	-0.073014	NA	NA	NA	NA	10399.1	6128.05	404940.5344	NONE
1	104384840	104385513	esv3587019	NONE	0.00925926	0	0	Absent	NO_DUP_NO_DEL	NA	NA	NA	NA	-0.241528	-0.241528	NA	NA	NA	NA	1137.56	1137.56	NA	NONE
1	104443176	104443721	esv3587022	NONE	0.180556	0.40404	0.165049	Absent	NO_DUP_NO_DEL	NA	NA	NA	NA	0.407491	-1.342064	0.742467	-1.729308	0.777266	-2.045769	23516.5	23516.5	402566.2433	NONE
1	104706647	104708051	esv3587035	NONE	0.0416667	0	0	Absent	NO_DUP_NO_DEL	NA	NA	NA	NA	3.257263	-0.51801	NA	NA	NA	NA	29293.5	11097	758232.6712	NONE
1	105218662	105219460	esv3587054	NONE	0	0.0858586	0	Ancient	NO_DUP_NO_DEL	NA	NA	NA	NA	NA	NA	4.159869	4.159869	NA	NA	2398.69	1634.35	281440.8467	NONE
1	105255038	105256195	esv3587056	NONE	0.25	0.0707071	0.524272	Absent	NO_DUP_NO_DEL	NA	NA	NA	NA	1.928728	-0.413754	2.435699	0.055103	3.726972	-0.757681	41168.3	3868.65	479048.6867	NONE
1	105625044	105630925	esv3587062	NONE	0.0324074	0	0	Recurrent	NO_DUP_NO_DEL	NA	NA	NA	NA	0.202589	0.202589	NA	NA	NA	NA	3464.81	3464.81	19302.815	NONE
1	105667567	105668446	esv3587063	NONE	0.236111	0.0909091	0.18932	Absent	NO_DUP_NO_DEL	NA	NA	NA	NA	-0.127961	-0.127961	-0.634823	-0.634823	-0.31104	-0.31104	23183.3	23183.3	449156.4	NONE
1	106015797	106023398	esv3587071	NONE	0.50463	0.262626	0.543689	Absent	NO_DUP_NO_DEL	NA	NA	NA	NA	0.051517	0.051517	0.183618	0.183618	-0.206156	-0.206156	59901.1	59901.1	942754.4	NONE
1	106135139	106137443	esv3587077	NONE	0	0.010101	0	Absent	NO_DUP_NO_DEL	NA	NA	NA	NA	NA	NA	NA	NA	NA	NA	335.004	335.004	NA	NONE
1	106164389	106215453	esv3587078	NONE	0.0231481	0	0	Absent	NO_DUP_NO_DEL	NA	NA	NA	NA	-0.119526	-0.119526	NA	NA	NA	NA	1444.16	1444.16	12834.654	NONE
1	106307493	106317948	esv3587080	NONE	0.0648148	0	0	Absent	NO_DUP_NO_DEL	NA	NA	NA	NA	-0.157696	-0.157696	NA	NA	NA	NA	4375.7	4321.23	18341.12	NONE
1	106978443	106981592	esv3587093	NONE	0.111111	0	0	Absent	NO_DUP_NO_DEL	NA	NA	NA	NA	2.371579	-0.008231	NA	NA	NA	NA	14010.5	5684.82	18432.435	NONE
1	107081794	107082334	esv3587097	NONE	0.0462963	0	0	Ancient	NO_DUP_NO_DEL	NA	NA	NA	NA	2.997284	-0.469876	NA	NA	NA	NA	24582.8	22901	551658.1	NONE
1	107095671	107101397	esv3587098	NONE	0.0972222	0	0	Absent	NO_DUP_NO_DEL	NA	NA	NA	NA	1.883527	-0.657273	NA	NA	NA	NA	18473.6	1194.02	227624.1434	NONE
1	107220681	107224674	esv3587099	NONE	0.0601852	0	0	Absent	NO_DUP_NO_DEL	NA	NA	NA	NA	1.133099	-0.167299	NA	NA	NA	NA	9725.32	3952.97	288808.6206	NONE
1	107403124	107405351	esv3587100	NONE	0.00925926	0	0	Absent	NO_DUP_NO_DEL	NA	NA	NA	NA	1.230335	-0.27488	NA	NA	NA	NA	11094.6	5050.78	NA	NONE
1	107896853	107899383	esv3587108	NONE	0	0	0.00970874	Absent	NO_DUP_NO_DEL	NA	NA	NA	NA	NA	NA	NA	NA	-1.206595	-1.206595	822.37	822.37	NA	NONE
1	109348674	109349553	esv3587137	NONE	0	0.010101	0	Absent	NO_DUP_NO_DEL	NA	NA	NA	NA	NA	NA	-0.700191	-0.700191	NA	NA	400.618	400.618	NA	NONE
1	109496490	109501636	esv3587143	NONE	0.0555556	0	0	Absent	NO_DUP_NO_DEL	NA	NA	NA	NA	0.420708	0.420708	NA	NA	NA	NA	21174.1	21174.1	NA	NONE
1	109573240	109575184	esv3587144	NONE	0.157407	0.292929	0.18932	Absent	NO_DUP_NO_DEL	NA	NA	NA	NA	0.126452	-0.887805	-0.139502	-1.060102	-0.32704	-1.153819	39196.4	23111.4	327407.85	NONE
1	109602616	109603316	esv3587146	NONE	0.138889	0.0555556	0.0145631	Absent	NO_DUP_NO_DEL	NA	NA	NA	NA	0.445906	0.445906	1.559673	1.510291	0.30016	0.30016	24797	7648.69	134233.12	NONE
1	110187159	110191392	esv3587152	NONE	0.513889	0.565657	0.68932	Ancient	NO_DUP_NO_DEL	NA	NA	NA	NA	NA	NA	NA	NA	NA	NA	43425.4	40486	NA	NONE
1	111013750	111014940	esv3587165	NONE	0	0	0.0145631	Absent	NO_DUP_NO_DEL	NA	NA	NA	NA	NA	NA	NA	NA	0.60466	0.60466	897.166	370.891	61466.58	NONE
1	111376650	111388643	esv3587173	NONE	0.157407	0.10101	0	Absent	NO_DUP_NO_DEL	NA	NA	NA	NA	0.243841	0.243841	0.579771	0.579771	NA	NA	3024.01	2301.27	NA	NONE
1	112691740	112704718	esv3587201	NONE	0.00925926	0.348485	0.402913	Absent	NO_DUP_NO_DEL	NA	NA	NA	NA	1.390659	1.390659	3.529336	3.529336	3.819566	3.819566	18238.6	18238.6	385268.03	NONE
1	113036692	113037956	esv3587213	NONE	0.0462963	0	0	Absent	NO_DUP_NO_DEL	NA	NA	NA	NA	1.298653	1.106261	NA	NA	NA	NA	4396.49	4253.5	45295.32	NONE
1	113529206	113532706	esv3587227	NONE	0.143519	0	0	Absent	NO_DUP_NO_DEL	NA	NA	NA	NA	1.803111	1.518565	NA	NA	NA	NA	13001.9	2829.18	116049.57	NONE
1	113955952	113958022	esv3587238	NONE	0	0.010101	0	Absent	NO_DUP_NO_DEL	NA	NA	NA	NA	NA	NA	-3.373694	-3.373694	NA	NA	354.254	354.254	NA	NONE
1	116229468	116232839	esv3587290	NONE	0.287037	0.262626	0.184466	Absent	NO_DUP_NO_DEL	NA	NA	NA	NA	0.130976	-0.140063	1.16936	1.16936	0.972837	0.972837	28026.8	28026.8	826451.2667	NONE
1	116831299	116836099	esv3587301	NONE	0.0138889	0	0	Absent	NO_DUP_NO_DEL	NA	NA	NA	NA	NA	NA	NA	NA	NA	NA	NA	NA	NA	NONE
1	117593370	117594971	esv3587307	NONE	0	0	0.0145631	Absent	NO_DUP_NO_DEL	NA	NA	NA	NA	NA	NA	NA	NA	1.122826	1.122826	532.129	470.622	9710.372	NONE
1	117880406	117881842	esv3587313	NONE	0.0787037	0.166667	0	Absent	NO_DUP_NO_DEL	NA	NA	NA	NA	3.721869	0.486833	4.168735	0.335645	NA	NA	18458.7	4084.95	426123.46	NONE
1	119482202	119483660	esv3587336	NONE	0.0509259	0	0	Absent	NO_DUP_NO_DEL	NA	NA	NA	NA	0.190442	-0.142751	NA	NA	NA	NA	2804.43	2677.44	56648.424	NONE
1	120012853	120013656	esv3587343	NONE	0.217593	0	0.0582524	Absent	NO_DUP_NO_DEL	NA	NA	NA	NA	NA	NA	NA	NA	NA	NA	27822.5	24522.2	NA	NONE
1	120151904	120154464	esv3587351	NONE	0.00925926	0	0	Absent	NO_DUP_NO_DEL	NA	NA	NA	NA	1.875494	1.875494	NA	NA	NA	NA	5924.15	5924.15	359404.5	NONE
1	147745982	147746749	esv3587451	NONE	0.00925926	0	0	Ancient	NO_DUP_NO_DEL	NA	NA	NA	NA	5.458371	-0.23213	NA	NA	NA	NA	7659.72	3996.37	NA	NONE
1	147807339	147810495	esv3587453	NONE	0.00925926	0	0	Absent	NO_DUP_NO_DEL	NA	NA	NA	NA	NA	NA	NA	NA	NA	NA	2397.62	1792.51	NA	NONE
1	149765121	149767735	esv3587495	NONE	0.0277778	0	0	Absent	NO_DUP_NO_DEL	NA	NA	NA	NA	NA	NA	NA	NA	NA	NA	2938.09	2938.09	NA	NONE
1	151423647	151426019	esv3587528	NONE	0	0	0.00970874	Absent	NO_DUP_NO_DEL	NA	NA	NA	NA	NA	NA	NA	NA	NA	NA	NA	NA	NA	NONE
1	153133703	153133960	esv3587577	NONE	0.282407	0.59596	0.582524	Absent	NO_DUP_NO_DEL	NA	NA	NA	NA	2.756741	2.756741	8.256901	8.256901	6.078706	6.078706	38536.2	37002.9	967612.8	NONE
1	153490736	153492377	esv3587587	NONE	0	0	0.00970874	Absent	NO_DUP_NO_DEL	NA	NA	NA	NA	NA	NA	NA	NA	3.83261	-0.289181	343.066	222.794	NA	NONE
1	154080945	154084660	esv3587598	NONE	0.111111	0	0	Absent	NO_DUP_NO_DEL	NA	NA	NA	NA	0.976195	0.976195	NA	NA	NA	NA	1572.29	1436.74	22846.306	NONE
1	155659699	155664464	esv3587631	NONE	0.578704	0	0	Ancient	NO_DUP_NO_DEL	NA	NA	NA	NA	1.530774	-0.548153	NA	NA	NA	NA	70906.5	41085.1	970006.1	NONE
1	156671984	156672739	esv3587640	NONE	0	0.010101	0	Absent	NO_DUP_NO_DEL	NA	NA	NA	NA	NA	NA	-5.392685	-5.392685	NA	NA	392.693	392.693	NA	NONE
1	157087252	157088503	esv3587646	NONE	0.0138889	0	0	Absent	NO_DUP_NO_DEL	NA	NA	NA	NA	1.442634	0.025167	NA	NA	NA	NA	3241.04	3029.46	NA	NONE
1	157173860	157175390	esv3587649	NONE	0.0277778	0.0909091	0.34466	Ancient	NO_DUP_NO_DEL	NA	NA	NA	NA	8.017082	0.527123	8.731692	-0.994686	7.627825	-0.995219	38879.4	1426.5	NA	NONE
1	157540655	157540871	esv3587652	NONE	0.0694444	0.328283	0.631068	Absent	NO_DUP_NO_DEL	NA	NA	NA	NA	2.120768	2.120768	1.25854	1.25854	0.182421	0.182421	2631.9	2631.9	172071.62	NONE
1	158867540	158869980	esv3587687	NONE	0.726852	0.707071	0.936893	Absent	NO_DUP_NO_DEL	NA	NA	NA	NA	3.267787	2.049063	3.819226	2.587041	4.177012	1.265071	69167.5	55970.4	2898147.204	NONE
1	158961353	158966208	esv3587689	NONE	0.143519	0.141414	0	Absent	NO_DUP_NO_DEL	NA	NA	NA	NA	4.264669	4.264669	4.834524	2.282225	NA	NA	15854.3	6291.19	229691.0233	NONE
1	159120062	159125564	esv3587695	NONE	0.0787037	0	0	Absent	NO_DUP_NO_DEL	NA	NA	NA	NA	-0.914256	-0.914256	NA	NA	NA	NA	9577.67	9577.67	99905.96	NONE
1	160205012	160205624	esv3587710	NONE	0.0185185	0	0	Absent	NO_DUP_NO_DEL	NA	NA	NA	NA	3.528814	2.806365	NA	NA	NA	NA	57587.9	7415.33	220560.4333	NONE
1	160935117	160939846	esv3587720	NONE	0	0.010101	0	Absent	NO_DUP_NO_DEL	NA	NA	NA	NA	NA	NA	-0.581316	-0.581316	NA	NA	1133.91	1133.91	46475.52	NONE
1	160953903	160960767	esv3587721	NONE	0.0138889	0	0	Absent	NO_DUP_NO_DEL	NA	NA	NA	NA	0.884776	0.884776	NA	NA	NA	NA	1072.56	1072.56	18537.12	NONE
1	160979498	160979991	esv3587722	NONE	0	0	0.00970874	Absent	NO_DUP_NO_DEL	NA	NA	NA	NA	NA	NA	NA	NA	1.451634	1.451634	706.75	706.75	23325.498	NONE
1	160997479	160999062	esv3587724	NONE	0.0185185	0	0	Absent	NO_DUP_NO_DEL	NA	NA	NA	NA	3.867599	-0.549984	NA	NA	NA	NA	1765.89	1234.37	20651.638	NONE
1	165421803	165424208	esv3587804	NONE	0.0324074	0	0	Absent	NO_DUP_NO_DEL	NA	NA	NA	NA	1.565866	1.565866	NA	NA	NA	NA	31793.5	31793.5	114984.0733	NONE
1	166396577	166397091	esv3587826	NONE	0.0231481	0	0	Ancient	NO_DUP_NO_DEL	NA	NA	NA	NA	2.237294	-0.034033	NA	NA	NA	NA	44931.2	3112.61	118795.4	NONE
1	166551470	166552838	esv3587831	NONE	0.152778	0	0	Absent	NO_DUP_NO_DEL	NA	NA	NA	NA	1.471165	1.32249	NA	NA	NA	NA	3708.76	3588.34	221653.6	NONE
1	166551580	166552537	esv3587832	NONE	0.157407	0	0	Absent	NO_DUP_NO_DEL	NA	NA	NA	NA	1.471165	1.32249	NA	NA	NA	NA	3708.76	3588.34	221653.6	NONE
1	167765305	167767578	esv3587855	NONE	0	0.0353535	0	Absent	NO_DUP_NO_DEL	NA	NA	NA	NA	NA	NA	-1.067893	-1.067893	NA	NA	1341.31	1341.31	NA	NONE
1	168287990	168290158	esv3587861	NONE	0.0185185	0.00505051	0	Absent	NO_DUP_NO_DEL	NA	NA	NA	NA	2.980296	2.980296	-0.410989	-0.410989	NA	NA	1265.54	1265.54	NA	NONE
1	168427027	168428839	esv3587864	NONE	0.0138889	0	0.126214	Absent	NO_DUP_NO_DEL	NA	NA	NA	NA	2.248024	2.248024	NA	NA	4.932801	4.247853	15653.5	15653.5	313828.27	NONE
1	168572217	168574233	esv3587867	NONE	0	0.010101	0	Absent	NO_DUP_NO_DEL	NA	NA	NA	NA	NA	NA	4.124829	4.124829	NA	NA	478.5	478.5	NA	NONE
1	169004356	169005229	esv3587877	NONE	0	0.151515	0.0145631	Introgressed	NO_DUP_NO_DEL	NA	NA	NA	NA	NA	NA	1.468333	-0.573944	2.437186	-0.449031	57616.7	1657.2	829021.72	NONE
1	169225213	169245324	esv3587880	NONE	0.0787037	0.348485	0.131068	Absent	NO_DUP_NO_DEL	NA	NA	NA	NA	3.669562	3.669562	1.281838	1.281838	0.573563	0.573563	4124.31	4124.31	NA	NONE
1	170367467	170387279	esv3587894	NONE	0.0231481	0	0	Absent	NO_DUP_NO_DEL	NA	NA	NA	NA	0.229859	0.229859	NA	NA	NA	NA	1332.93	1332.93	NA	NONE
1	171408915	171411997	esv3587915	NONE	0.0138889	0	0	Absent	NO_DUP_NO_DEL	NA	NA	NA	NA	0.944341	0.944341	NA	NA	NA	NA	6705.07	1062.15	55990.76	NONE
1	172759295	172762008	esv3587931	NONE	0.0185185	0	0	Absent	NO_DUP_NO_DEL	NA	NA	NA	NA	1.759715	0.42991	NA	NA	NA	NA	3476.84	2849.72	22078.56	NONE
1	173543896	173544936	esv3587946	NONE	0.00925926	0	0	Absent	NO_DUP_NO_DEL	NA	NA	NA	NA	-0.317214	-0.511083	NA	NA	NA	NA	1029.26	1029.26	NA	NONE
1	173963382	173968155	esv3587950	NONE	0.00925926	0	0	Absent	NO_DUP_NO_DEL	NA	NA	NA	NA	1.141435	1.141435	NA	NA	NA	NA	1762.66	1762.66	NA	NONE
1	174611702	174619381	esv3587966	NONE	0.00925926	0	0	Absent	NO_DUP_NO_DEL	NA	NA	NA	NA	0.836552	0.836552	NA	NA	NA	NA	591.374	416.653	NA	NONE
1	175022467	175026204	esv3587974	NONE	0.0601852	0	0	Absent	NO_DUP_NO_DEL	NA	NA	NA	NA	1.325947	-0.19848	NA	NA	NA	NA	19449.2	8513.94	61114.564	NONE
1	175411521	175412145	esv3587988	NONE	0.0324074	0	0	Absent	NO_DUP_NO_DEL	NA	NA	NA	NA	0.795899	0.795899	NA	NA	NA	NA	4013.57	2596.98	136005.1	NONE
1	178659627	178676241	esv3588039	NONE	0.0185185	0	0	Absent	NO_DUP_NO_DEL	NA	NA	NA	NA	0.865895	0.865895	NA	NA	NA	NA	971.521	971.521	32658.542	NONE
1	178892147	178896948	esv3588041	NONE	0.00925926	0	0	Absent	NO_DUP_NO_DEL	NA	NA	NA	NA	-0.165421	-0.165421	NA	NA	NA	NA	1562.51	1562.51	NA	NONE
1	179329682	179333698	esv3588050	NONE	0.24537	0.0505051	0	Ancient	NO_DUP_NO_DEL	NA	NA	NA	NA	1.311904	0.262398	0.891294	0.668812	NA	NA	27062	20227.6	600194.2333	NONE
1	179455593	179458303	esv3588053	NONE	0.180556	0.0505051	0	Ancient	NO_DUP_NO_DEL	NA	NA	NA	NA	2.265549	1.504328	1.244647	0.605267	NA	NA	58396.3	58396.3	1535530.033	NONE
1	179607260	179608065	esv3588056	NONE	0.24537	0.383838	0.368932	Ancient	NO_DUP_NO_DEL	NA	NA	NA	NA	2.392874	0.261991	3.028046	-0.14405	3.285862	-0.317747	29489.8	28213.1	943429.35	NONE
1	180272299	180273830	esv3588066	NONE	0	0.0454545	0.00970874	Absent	DEL_OR_PARTIAL_DEL	NA	NA	NA	NA	NA	NA	7.034508	1.574327	7.915064	1.55416	56015.4	1394.6	415677.7224	NONE
1	180749765	180755414	esv3588073	NONE	0	0.0151515	0	Absent	NO_DUP_NO_DEL	NA	NA	NA	NA	NA	NA	-0.402145	-0.402145	NA	NA	1276.36	1276.36	15180.354	NONE
1	181043348	181043808	esv3588077	NONE	0.472222	0.242424	0.320388	Absent	NO_DUP_NO_DEL	NA	NA	NA	NA	1.324622	-0.082862	2.412159	-0.270246	2.564241	-0.047649	47750.7	36277.9	1449898.262	NONE
1	183308627	183309115	esv3588111	NONE	0	0	0.0242718	Introgressed	NO_DUP_NO_DEL	NA	NA	NA	NA	NA	NA	NA	NA	4.01328	2.227709	2968.7	2560.89	279779.8724	NONE
1	185783709	185785298	esv3588145	NONE	0.12963	0.00505051	0	Ancient	NO_DUP_NO_DEL	NA	NA	NA	NA	1.99372	0.217035	11.551325	-0.734469	NA	NA	33486.5	31081.7	768951.274	NONE
1	186551957	186553834	esv3588152	NONE	0	0.010101	0	Absent	NO_DUP_NO_DEL	NA	NA	NA	NA	NA	NA	-0.396864	-0.396864	NA	NA	127.143	127.143	NA	NONE
1	187399793	187405046	esv3588164	NONE	0.0231481	0	0	Absent	NO_DUP_NO_DEL	NA	NA	NA	NA	3.112836	-0.024193	NA	NA	NA	NA	27177	2624.55	639816.24	NONE
1	187464747	187466829	esv3588165	NONE	0.796296	0.787879	1	Ancient	NO_DUP_NO_DEL	NA	NA	NA	NA	3.5037	1.827137	4.509378	3.219246	NA	NA	51496.5	37002.9	2009382.55	NONE
1	187572707	187582112	esv3588168	NONE	0.037037	0	0	Absent	NO_DUP_NO_DEL	NA	NA	NA	NA	1.443145	1.443145	NA	NA	NA	NA	3446.52	3446.52	359386.944	NONE
1	187593646	187596895	esv3588170	NONE	0.037037	0	0	Absent	NO_DUP_NO_DEL	NA	NA	NA	NA	1.443145	1.443145	NA	NA	NA	NA	3446.52	3446.52	482368.866	NONE
1	187716053	187722514	esv3588176	NONE	0.037037	0.494949	0	Absent	NO_DUP_NO_DEL	NA	NA	NA	NA	2.837281	2.837281	0.952033	0.952033	NA	NA	3500.24	2936.71	227021.55	NONE
1	188959002	188966468	esv3588222	NONE	0.0185185	0	0	Absent	NO_DUP_NO_DEL	NA	NA	NA	NA	2.023388	0.213195	NA	NA	NA	NA	25634.1	18247.7	105393.23	NONE
1	189071717	189077756	esv3588231	NONE	0.00925926	0	0	Absent	NO_DUP_NO_DEL	NA	NA	NA	NA	6.790815	-0.672601	NA	NA	NA	NA	2008.38	1099.77	NA	NONE
1	189087087	189093638	esv3588234	NONE	0.00925926	0	0	Absent	NO_DUP_NO_DEL	NA	NA	NA	NA	1.862643	1.862643	NA	NA	NA	NA	1124.52	1124.52	15601.614	NONE
1	189200860	189201831	esv3588237	NONE	0.0138889	0.020202	0	Ancient	NO_DUP_NO_DEL	NA	NA	NA	NA	1.895622	1.895622	0.91056	-2.857864	NA	NA	42302.9	2176.88	903617.232	NONE
1	189243964	189246900	esv3588239	NONE	0.125	0	0	Absent	NO_DUP_NO_DEL	NA	NA	NA	NA	1.788337	1.788337	NA	NA	NA	NA	21242.3	18118.1	201934.1324	NONE
1	189325961	189544439	esv3588247	NONE	0	0	0.0145631	Absent	NO_DUP_NO_DEL	NA	NA	NA	NA	NA	NA	NA	NA	-1.493394	-1.493394	809.436	809.436	38871.462	NONE
1	189530165	189530735	esv3588262	NONE	0.12037	0	0	Absent	DEL_OR_PARTIAL_DEL	NA	NA	NA	NA	1.539466	1.539466	NA	NA	NA	NA	22941.7	17257.5	374224.69	NONE
1	189853331	189854117	esv3588281	NONE	0.0694444	0	0	Absent	DEL_OR_PARTIAL_DEL	NA	NA	NA	NA	0.495626	-0.382032	NA	NA	NA	NA	13864.9	1398.13	146884.5793	NONE
1	190052658	190053873	esv3588295	NONE	0.162037	0	0	Absent	NO_DUP_NO_DEL	NA	NA	NA	NA	2.579181	0.931516	NA	NA	NA	NA	5732.28	4239.38	395546.2853	NONE
1	190873152	190876100	esv3588312	NONE	0.00925926	0	0	Absent	NO_DUP_NO_DEL	NA	NA	NA	NA	0.656541	-0.196442	NA	NA	NA	NA	1175.51	1175.51	NA	NONE
1	191716928	191726581	esv3588334	NONE	0.0185185	0	0	Absent	NO_DUP_NO_DEL	NA	NA	NA	NA	0.712167	0.712167	NA	NA	NA	NA	1215.02	1215.02	NA	NONE
1	191827807	191868768	esv3588341	NONE	0.0416667	0	0	Absent	NO_DUP_NO_DEL	NA	NA	NA	NA	-0.213623	-0.860119	NA	NA	NA	NA	1662.45	1619.2	286301.8445	NONE
1	191916438	191918546	esv3588345	NONE	0.546296	0.0909091	0.150485	Absent	NO_DUP_NO_DEL	NA	NA	NA	NA	-0.652755	-1.078787	1.359581	0.142757	0.323186	0.323186	19085.1	2902.8	307708.5667	NONE
1	192860399	192861923	esv3588362	NONE	0.277778	0	0	Absent	NO_DUP_NO_DEL	NA	NA	NA	NA	0.430554	-0.665074	NA	NA	NA	NA	17353.9	12125.5	151777.164	NONE
1	193868336	193869255	esv3588376	NONE	0.00925926	0	0	Absent	NO_DUP_NO_DEL	NA	NA	NA	NA	-0.008526	-0.008526	NA	NA	NA	NA	1834.88	308.825	NA	NONE
1	194451056	194454312	esv3588393	NONE	0.5	0.676768	0.68932	Absent	NO_DUP_NO_DEL	NA	NA	NA	NA	2.471399	-0.239967	3.62117	-0.469335	5.075864	1.824475	34355.1	3492	1130353.862	NONE
1	194517604	194517863	esv3588396	NONE	0.157407	0.777778	0.737864	Absent	NO_DUP_NO_DEL	NA	NA	NA	NA	-0.36065	-0.681352	0.819892	-0.200645	3.056312	0.043117	35664.8	2539.97	477633.8	NONE
1	194759375	194760552	esv3588404	NONE	0.0231481	0	0	Absent	NO_DUP_NO_DEL	NA	NA	NA	NA	1.416386	1.416386	NA	NA	NA	NA	1730.09	1730.09	NA	NONE
1	195359320	195365491	esv3588436	NONE	0.00925926	0	0	Absent	NO_DUP_NO_DEL	NA	NA	NA	NA	3.008067	-0.534052	NA	NA	NA	NA	21948.4	975.65	74731.02933	NONE
1	195409339	195416415	esv3588441	NONE	0.0509259	0	0	Absent	NO_DUP_NO_DEL	NA	NA	NA	NA	-0.354929	-0.354929	NA	NA	NA	NA	2167.01	2167.01	92341.9	NONE
1	196602664	196604033	esv3588466	NONE	0.00925926	0.00505051	0.0679612	Absent	NO_DUP_NO_DEL	NA	NA	NA	NA	0.579783	0.312065	4.409157	0.304184	2.142641	-0.69814	10347	5565.1	181390.524	NONE
1	197268844	197269752	esv3588496	NONE	0.0185185	0	0	Absent	NO_DUP_NO_DEL	NA	NA	NA	NA	4.377589	-0.271724	NA	NA	NA	NA	9296.02	1205.76	66512.25583	NONE
1	197720697	197722847	esv3588506	NONE	0.0185185	0	0	Absent	NO_DUP_NO_DEL	NA	NA	NA	NA	2.908361	-0.395921	NA	NA	NA	NA	1113.26	920.029	35042.34533	NONE
1	197894025	197894310	esv3588508	NONE	0.518519	0.363636	0.640777	Absent	NO_DUP_NO_DEL	NA	NA	NA	NA	NA	NA	NA	NA	NA	NA	NA	NA	NA	NONE
1	198304656	198310281	esv3588522	NONE	0.12037	0.030303	0.160194	Absent	NO_DUP_NO_DEL	NA	NA	NA	NA	0.917293	0.251699	2.318649	0.14059	1.18999	-1.673979	16946.6	4797.55	499211.4283	NONE
1	198773749	198775415	esv3588535	NONE	0.0601852	0.252525	0.495146	Absent	NO_DUP_NO_DEL	NA	NA	NA	NA	1.071484	-0.410806	-0.08799	-0.08799	0.358848	-0.797327	25556.8	10540.4	261628.4533	NONE
1	198886122	198886827	esv3588538	NONE	0.0324074	0	0	Absent	NO_DUP_NO_DEL	NA	NA	NA	NA	-0.032853	-0.139887	NA	NA	NA	NA	1789.43	1789.43	14029.057	NONE
1	199564008	199566657	esv3588548	NONE	0	0.0505051	0	Absent	NO_DUP_NO_DEL	NA	NA	NA	NA	NA	NA	-0.141974	-0.141974	NA	NA	907.368	907.368	26016.319	NONE
1	202295105	202297677	esv3588580	NONE	0.0138889	0	0	Absent	NO_DUP_NO_DEL	NA	NA	NA	NA	-0.629939	-0.629939	NA	NA	NA	NA	762.044	762.044	9561.902	NONE
1	203064255	203065189	esv3588590	NONE	0	0.0151515	0	Absent	NO_DUP_NO_DEL	NA	NA	NA	NA	NA	NA	0.422775	0.422775	NA	NA	1110.77	1110.77	50522.962	NONE
1	203684252	203686389	esv3588598	NONE	0.111111	0.176768	0.305825	Ancient	NO_DUP_NO_DEL	NA	NA	NA	NA	NA	NA	NA	NA	NA	NA	33741.7	33741.7	532648.2	NONE
1	203786422	203787480	esv3588603	NONE	0	0.040404	0	Absent	NO_DUP_NO_DEL	NA	NA	NA	NA	NA	NA	2.021821	2.021821	NA	NA	823.99	821.755	44190.58	NONE
1	203887673	203889898	esv3588607	NONE	0.222222	0.00505051	0	Absent	NO_DUP_NO_DEL	NA	NA	NA	NA	5.374578	2.002672	11.2558	2.759426	NA	NA	60583.9	54863.1	2348857.516	NONE
1	203894270	203895883	esv3588608	NONE	0.222222	0.00505051	0	Ancient	NO_DUP_NO_DEL	NA	NA	NA	NA	5.374578	0.78787	11.2558	1.380686	NA	NA	60583.9	60583.9	2348857.516	NONE
1	203935832	203945458	esv3588611	NONE	0.00462963	0.00505051	0	Absent	NO_DUP_NO_DEL	NA	NA	NA	NA	2.787473	0.917458	5.476432	0.125619	NA	NA	15423.1	3773.25	225201.0657	NONE
1	205251509	205252489	esv3588634	NONE	0.0416667	0	0	Absent	NO_DUP_NO_DEL	NA	NA	NA	NA	1.048708	1.027233	NA	NA	NA	NA	1811.49	1099.74	523861.45	NONE
1	206281075	206283144	esv3588651	NONE	0	0	0.0145631	Ancient	NO_DUP_NO_DEL	NA	NA	NA	NA	NA	NA	NA	NA	6.895312	-2.161614	1618.4	743.107	32062.87	NONE
1	206814657	206815704	esv3588657	NONE	0.087963	0.00505051	0.174757	Absent	NO_DUP_NO_DEL	NA	NA	NA	NA	-1.040154	-1.040154	-1.998366	-1.998366	-2.346624	-2.346624	22659.2	22659.2	157040.38	NONE
1	207292375	207292595	esv3588666	NONE	0.300926	0.666667	0.728155	Absent	NO_DUP_NO_DEL	NA	NA	NA	NA	6.939148	1.294516	8.132806	2.110744	10.860025	2.575734	36937.3	34059.3	2595236.735	NONE
1	207292405	207293149	esv3588667	NONE	0.291667	0.666667	0.728155	Absent	NO_DUP_NO_DEL	NA	NA	NA	NA	6.939148	1.294516	8.132806	2.110744	10.860025	2.575734	36937.3	34059.3	2595236.735	NONE
1	207841060	207845817	esv3588675	NONE	0.0925926	0	0	Absent	NO_DUP_NO_DEL	NA	NA	NA	NA	0.172301	-0.252118	NA	NA	NA	NA	33155	9102.27	429439.3	NONE
1	210078053	210085978	esv3588710	NONE	0.62037	0.570707	0.427184	Absent	NO_DUP_NO_DEL	NA	NA	NA	NA	0.84645	0.84645	4.601763	4.601763	3.653462	3.653462	4245.97	4245.97	305047.12	NONE
1	210284577	210289343	esv3588715	NONE	0.0601852	0	0	Absent	NO_DUP_NO_DEL	NA	NA	NA	NA	-0.264658	-0.380231	NA	NA	NA	NA	6298.51	6298.51	94506.44	NONE
1	210722465	210724881	esv3588720	NONE	0.115741	0.0252525	0.305825	Absent	NO_DUP_NO_DEL	NA	NA	NA	NA	1.715028	-0.428415	3.364426	-0.687855	2.680703	-0.791781	20534.9	20122.5	1234756.133	NONE
1	211369240	211370427	esv3588727	NONE	0.111111	0	0	Absent	NO_DUP_NO_DEL	NA	NA	NA	NA	1.896698	1.291005	NA	NA	NA	NA	28671.8	4929.5	1283599.652	NONE
1	211965009	211965782	esv3588737	NONE	0.00462963	0.030303	0	Ancient	NO_DUP_NO_DEL	NA	NA	NA	NA	1.240784	-0.137454	1.023343	0.081373	NA	NA	1596.48	1460.83	61697.33733	NONE
1	213083966	213086597	esv3588760	NONE	0.328704	0.80303	0.902913	Absent	DEL_OR_PARTIAL_DEL	NA	NA	NA	NA	8.244805	6.396447	12.35197	8.244604	15.099754	9.867335	57666.2	44516	2510264.938	NONE
1	214853028	214856282	esv3588791	NONE	0.0231481	0	0	Absent	NO_DUP_NO_DEL	NA	NA	NA	NA	2.881806	0.461158	NA	NA	NA	NA	5660.92	3974.39	213691.38	NONE
1	216231483	216232002	esv3588822	NONE	0.231481	0.0858586	0	Absent	NO_DUP_NO_DEL	NA	NA	NA	NA	0.031044	0.031044	-1.280685	-1.579639	NA	NA	16288.6	16288.6	222288.64	NONE
1	217457929	217458372	esv3588839	NONE	0.24537	0.106061	0.106796	Absent	NO_DUP_NO_DEL	NA	NA	NA	NA	1.016274	0.202758	2.796482	-0.421063	3.241314	0.576054	20201.9	14133.8	408622.3071	NONE
1	217695937	217697554	esv3588845	NONE	0.0231481	0	0	Absent	NO_DUP_NO_DEL	NA	NA	NA	NA	-0.075228	-0.827028	NA	NA	NA	NA	14313.5	7622.03	275102.73	NONE
1	218417920	218421665	esv3588868	NONE	0.037037	0	0	Absent	NO_DUP_NO_DEL	NA	NA	NA	NA	2.9026	0.767054	NA	NA	NA	NA	29981	29958.5	1868775.129	NONE
1	220502866	220503587	esv3588900	NONE	0.0185185	0.171717	0.18932	Absent	NO_DUP_NO_DEL	NA	NA	NA	NA	3.059121	1.867856	1.400408	1.400408	3.112439	1.412112	5612.03	3197.86	144098.2433	NONE
1	221071040	221072093	esv3588909	NONE	0.00925926	0	0	Absent	NO_DUP_NO_DEL	NA	NA	NA	NA	0.028801	0.028801	NA	NA	NA	NA	953.754	953.754	28687.568	NONE
1	221113786	221118700	esv3588911	NONE	0	0.00505051	0.0145631	Absent	NO_DUP_NO_DEL	NA	NA	NA	NA	NA	NA	-0.556528	-0.556528	-0.430704	-0.430704	1008.08	1008.08	58124.598	NONE
1	221325071	221326357	esv3588914	NONE	0.0138889	0	0	Absent	NO_DUP_NO_DEL	NA	NA	NA	NA	0.597415	0.597415	NA	NA	NA	NA	3608.99	3180.54	47648.02	NONE
1	221743901	221754476	esv3588928	NONE	0.0416667	0	0	Absent	NO_DUP_NO_DEL	NA	NA	NA	NA	0.446362	0.446362	NA	NA	NA	NA	1703.58	1703.58	14686.252	NONE
1	222374169	222380531	esv3588936	NONE	0.222222	0.358586	0.184466	Absent	NO_DUP_NO_DEL	NA	NA	NA	NA	0.371501	-0.02227	0.90795	0.899865	1.435081	-2.090832	17616.1	5551.08	514330.16	NONE
1	222550320	222551217	esv3588939	NONE	0	0.010101	0.262136	Introgressed	NO_DUP_NO_DEL	NA	NA	NA	NA	NA	NA	1.295383	-0.273651	2.944199	2.205045	3500.14	2788.54	343414.6275	NONE
1	223006127	223006612	esv3588951	NONE	0.0185185	0	0	Absent	NO_DUP_NO_DEL	NA	NA	NA	NA	1.41491	0.422616	NA	NA	NA	NA	843.467	787.901	310297.6492	NONE
1	224324265	224327250	esv3588968	NONE	0.0185185	0	0	Absent	NO_DUP_NO_DEL	NA	NA	NA	NA	1.747219	1.747219	NA	NA	NA	NA	38238.3	6228.73	6883.758	NONE
1	224815617	224818352	esv3588977	NONE	0	0	0.0533981	Introgressed	NO_DUP_NO_DEL	NA	NA	NA	NA	NA	NA	NA	NA	3.490575	-0.535217	3851.11	3658.53	354932.795	NONE
1	224993603	224996523	esv3588979	NONE	0.0231481	0	0	Absent	NO_DUP_NO_DEL	NA	NA	NA	NA	-1.435442	-1.435442	NA	NA	NA	NA	1112.43	1112.43	NA	NONE
1	226197046	226200018	esv3589007	NONE	0	0	0.0485437	Absent	NO_DUP_NO_DEL	NA	NA	NA	NA	NA	NA	NA	NA	3.519526	2.732718	2125.85	2125.85	43370.18	NONE
1	227444940	227449324	esv3589029	NONE	0.134259	0.00505051	0	Absent	NO_DUP_NO_DEL	NA	NA	NA	NA	0.922915	0.213853	1.018758	0.626808	NA	NA	12277.6	12263	266080.64	NONE
1	227776744	227779043	esv3589036	NONE	0.037037	0	0	Absent	NO_DUP_NO_DEL	NA	NA	NA	NA	NA	NA	NA	NA	NA	NA	2632.56	2632.56	NA	NONE
1	228160156	228161298	esv3589041	NONE	0.0694444	0	0	Absent	DUP	NA	NA	NA	NA	3.02972	3.02972	NA	NA	NA	NA	4366.98	4041.37	NA	NONE
1	228431306	228431923	esv3589048	NONE	0.0138889	0	0	Absent	NO_DUP_NO_DEL	NA	NA	NA	NA	-0.006915	-0.006915	NA	NA	NA	NA	863.166	863.166	NA	NONE
1	229411562	229413811	esv3589070	NONE	0.0833333	0	0	Ancient	NO_DUP_NO_DEL	NA	NA	NA	NA	2.351712	1.047931	NA	NA	NA	NA	35772.7	22667.4	387010.3098	NONE
1	229466870	229468128	esv3589073	NONE	0.0185185	0	0	Absent	NO_DUP_NO_DEL	NA	NA	NA	NA	NA	NA	NA	NA	NA	NA	NA	NA	NA	NONE
1	229812540	229820837	esv3589078	NONE	0.268519	0.232323	0.393204	Absent	NO_DUP_NO_DEL	NA	NA	NA	NA	-0.427831	-0.427831	-1.096502	-1.203043	-1.296132	-1.713159	30207	9190.48	1058627.5	NONE
1	230580029	230589419	esv3589092	NONE	0.0185185	0	0	Absent	NO_DUP_NO_DEL	NA	NA	NA	NA	2.915705	2.915705	NA	NA	NA	NA	1140.91	1140.91	NA	NONE
1	231535365	231546044	esv3589111	NONE	0	0	0.0291262	Absent	NO_DUP_NO_DEL	NA	NA	NA	NA	NA	NA	NA	NA	-0.342424	-0.342424	865.754	865.754	NA	NONE
1	232458585	232460249	esv3589130	NONE	0.180556	0.30303	0.23301	Absent	NO_DUP_NO_DEL	NA	NA	NA	NA	0.624233	0.624233	0.4761	0.4761	-0.012157	-0.701139	13545.5	6184.87	535432.1	NONE
1	233962115	233963557	esv3589155	NONE	0.986111	0.767677	0.825243	Ancient	NO_DUP_NO_DEL	NA	NA	NA	NA	6.127025	-0.475813	5.359807	0.082679	5.120546	-0.074376	58717.7	47215.1	2249198.272	NONE
1	234318645	234319749	esv3589165	NONE	0.00462963	0.0858586	0.898058	Absent	NO_DUP_NO_DEL	NA	NA	NA	NA	2.518439	0.155644	5.874243	0.673558	3.180278	3.180278	16833.8	2653.07	479706.9455	NONE
1	234646607	234647768	esv3589174	NONE	0.0138889	0	0	Absent	NO_DUP_NO_DEL	NA	NA	NA	NA	0.218441	0.218441	NA	NA	NA	NA	4039.69	4039.69	22027.054	NONE
1	235254964	235256111	esv3589190	NONE	0.300926	0.0808081	0.00970874	Absent	NO_DUP_NO_DEL	NA	NA	NA	NA	NA	NA	NA	NA	NA	NA	32200.5	31523.2	NA	NONE
1	235537077	235538345	esv3589194	NONE	0.287037	0.0959596	0.0291262	Absent	DEL_OR_PARTIAL_DEL	NA	NA	NA	NA	2.853855	-0.591483	6.345652	-0.496696	10.502456	0.12324	29096.9	2837.89	452438.98	NONE
1	235872733	235873254	esv3589199	NONE	0.162037	0	0	Ancient	NO_DUP_NO_DEL	NA	NA	NA	NA	3.755163	-0.805145	NA	NA	NA	NA	33991.4	30335.3	989479.6909	NONE
1	236279278	236279832	esv3589206	NONE	0.175926	0.166667	0.407767	Absent	NO_DUP_NO_DEL	NA	NA	NA	NA	2.123641	1.39632	4.420375	2.84483	3.812066	2.117885	20956.3	14907.9	1001435.307	NONE
1	236362868	236366073	esv3589211	NONE	0.0277778	0	0	Absent	NO_DUP_NO_DEL	NA	NA	NA	NA	1.666153	-0.218707	NA	NA	NA	NA	5656.37	1786.11	49552.93	NONE
1	236584123	236584886	esv3589220	NONE	0.0694444	0.0757576	0.0679612	Absent	NO_DUP_NO_DEL	NA	NA	NA	NA	1.873648	1.873648	-0.241854	-0.241854	0.424259	0.424259	2176.64	2176.64	458663.38	NONE
1	237342429	237343579	esv3589231	NONE	0.00925926	0	0	Absent	NO_DUP_NO_DEL	NA	NA	NA	NA	0.636236	-0.603272	NA	NA	NA	NA	4509.15	4509.15	NA	NONE
1	238316705	238318142	esv3589246	NONE	0.0740741	0	0	Absent	NO_DUP_NO_DEL	NA	NA	NA	NA	0.101666	0.101666	NA	NA	NA	NA	20347.4	20347.4	NA	NONE
1	238483830	238486630	esv3589250	NONE	0.0138889	0	0	Absent	NO_DUP_NO_DEL	NA	NA	NA	NA	2.013116	0.403152	NA	NA	NA	NA	13511.8	12247.7	48380.3572	NONE
1	238750631	238752207	esv3589259	NONE	0.0833333	0	0	Absent	NO_DUP_NO_DEL	NA	NA	NA	NA	1.645205	1.645205	NA	NA	NA	NA	17615.6	17615.6	219540.3	NONE
1	240393001	240394783	esv3589305	NONE	0.527778	0.212121	0.359223	Absent	NO_DUP_NO_DEL	NA	NA	NA	NA	0.668979	-0.149804	2.238428	-0.276643	2.066597	0.032925	37132.3	29981.8	746305.8	NONE
1	240641200	240641602	esv3589314	NONE	0.328704	0.419192	0.427184	Absent	NO_DUP_NO_DEL	NA	NA	NA	NA	2.200301	1.385092	3.495034	3.05481	5.207748	5.179537	32642.6	32642.6	1555407	NONE
1	241593829	241596418	esv3589341	NONE	0.00925926	0	0	Absent	NO_DUP_NO_DEL	NA	NA	NA	NA	2.623219	2.623219	NA	NA	NA	NA	1849.07	1849.07	70460.74933	NONE
1	241853736	241854384	esv3589350	NONE	0	0	0.0145631	Absent	NO_DUP_NO_DEL	NA	NA	NA	NA	NA	NA	NA	NA	0.940565	0.940565	456.707	446.606	NA	NONE
1	242122475	242124661	esv3589358	NONE	0	0	0.0145631	Absent	NO_DUP_NO_DEL	NA	NA	NA	NA	NA	NA	NA	NA	-0.931199	-0.931199	635.665	635.665	109790.45	NONE
1	243069842	243082100	esv3589381	NONE	0	0.010101	0	Absent	NO_DUP_NO_DEL	NA	NA	NA	NA	NA	NA	NA	NA	NA	NA	945.621	945.621	NA	NONE
1	243127774	243129222	esv3589384	NONE	0.203704	0.267677	0.373786	Absent	NO_DUP_NO_DEL	NA	NA	NA	NA	0.264139	0.264139	3.134591	3.134591	3.988895	3.988895	34486.7	30117.5	NA	NONE
1	244287365	244287934	esv3589402	NONE	0.00925926	0	0	Absent	NO_DUP_NO_DEL	NA	NA	NA	NA	0.138085	0.138085	NA	NA	NA	NA	1348.84	876.716	NA	NONE
1	245438490	245443495	esv3589438	NONE	0	0	0.0242718	Absent	NO_DUP_NO_DEL	NA	NA	NA	NA	NA	NA	NA	NA	0.608922	0.608922	1226.9	1226.9	52980.368	NONE
1	247031666	247032401	esv3589495	NONE	0.0138889	0	0	Recurrent	NO_DUP_NO_DEL	NA	NA	NA	NA	2.391124	2.391124	NA	NA	NA	NA	1977.18	1977.18	61194.7	NONE
1	247231007	247232769	esv3589505	NONE	0.115741	0	0	Absent	NO_DUP_NO_DEL	NA	NA	NA	NA	2.523813	0.662975	NA	NA	NA	NA	20136.5	7114.37	218664.1582	NONE
1	248154501	248155588	esv3589530	NONE	0.12037	0.0656566	0.174757	Absent	NO_DUP_NO_DEL	NA	NA	NA	NA	2.760683	1.293625	3.635302	0.046595	1.698894	-0.114904	32066.9	13227.9	NA	NONE
2	32145	34840	esv3589588	NONE	0	0.0252525	0	Absent	NO_DUP_NO_DEL	NA	NA	NA	NA	NA	NA	0.948315	0.948315	NA	NA	1079.45	1079.45	27599.11	NONE
2	2178325	2179490	esv3589636	NONE	0.0324074	0	0	Absent	NO_DUP_NO_DEL	NA	NA	NA	NA	5.592284	1.231486	NA	NA	NA	NA	57906.4	24655.8	1005056.081	NONE
2	2798774	2799246	esv3589650	NONE	0.458333	0.671717	0.169903	Absent	NO_DUP_NO_DEL	NA	NA	NA	NA	-0.785989	-0.785989	-1.453191	-1.453191	-2.384887	-2.384887	38191.7	38191.7	NA	NONE
2	3732802	3738024	esv3589665	NONE	0	0.0757576	0.140777	Introgressed	NO_DUP_NO_DEL	NA	NA	NA	NA	NA	NA	1.799191	1.799191	1.713545	1.713545	2304.4	2073.48	209300.84	NONE
2	4212110	4223633	esv3589676	NONE	0	0.171717	0.00970874	Introgressed	NO_DUP_NO_DEL	NA	NA	NA	NA	NA	NA	0.759756	-1.148303	3.778878	0.181389	10968.9	3126.27	461276.57	NONE
2	4651692	4654018	esv3589687	NONE	0.0555556	0	0	Absent	NO_DUP_NO_DEL	NA	NA	NA	NA	0.833417	-0.052041	NA	NA	NA	NA	20175.6	10003.6	242342.7816	NONE
2	5137419	5139641	esv3589695	NONE	0.0509259	0	0	Ancient	NO_DUP_NO_DEL	NA	NA	NA	NA	0.907386	0.907386	NA	NA	NA	NA	9295.25	3782.88	NA	NONE
2	5137508	5138165	esv3589696	NONE	0.0555556	0	0	Ancient	NO_DUP_NO_DEL	NA	NA	NA	NA	0.907386	0.907386	NA	NA	NA	NA	9030.15	3782.88	NA	NONE
2	5736031	5737325	esv3589710	NONE	0	0.030303	0	Absent	NO_DUP_NO_DEL	NA	NA	NA	NA	NA	NA	1.191374	1.191374	NA	NA	2251.81	1932.59	48425.09	NONE
2	6298254	6308734	esv3589716	NONE	0.0787037	0	0	Absent	NO_DUP_NO_DEL	NA	NA	NA	NA	3.935929	3.287682	NA	NA	NA	NA	20200.2	4247.14	351815.8508	NONE
2	6400504	6402196	esv3589719	NONE	0.0833333	0.136364	0.160194	Absent	NO_DUP_NO_DEL	NA	NA	NA	NA	0.818701	0.818701	1.252528	1.252528	-0.377081	-0.377081	2016.13	2016.13	194218.64	NONE
2	7229958	7235779	esv3589737	NONE	0.0462963	0	0	Absent	NO_DUP_NO_DEL	NA	NA	NA	NA	1.037442	0.075829	NA	NA	NA	NA	24709.1	4710.21	333804.8875	NONE
2	10076617	10077796	esv3589788	NONE	0.037037	0	0	Absent	NO_DUP_NO_DEL	NA	NA	NA	NA	2.529309	0.105304	NA	NA	NA	NA	9808.96	842.72	78086.66367	NONE
2	10702514	10706482	esv3589804	NONE	0	0	0.00970874	Absent	NO_DUP_NO_DEL	NA	NA	NA	NA	NA	NA	NA	NA	-0.373922	-1.124529	740.291	740.291	28692.538	NONE
2	11395086	11400668	esv3589814	NONE	0.0231481	0	0	Absent	NO_DUP_NO_DEL	NA	NA	NA	NA	-0.361934	-0.361934	NA	NA	NA	NA	4733.37	4733.37	NA	NONE
2	14236152	14236800	esv3589873	NONE	0.037037	0	0	Absent	NO_DUP_NO_DEL	NA	NA	NA	NA	-0.484456	-0.484456	NA	NA	NA	NA	1477.28	1477.28	8314.152	NONE
2	14452358	14455270	esv3589880	NONE	0.00462963	0.00505051	0	Absent	NO_DUP_NO_DEL	NA	NA	NA	NA	1.782028	-0.333153	2.746722	-0.984717	NA	NA	5535.1	5230.85	168474.8304	NONE
2	16560513	16561532	esv3589928	NONE	0.148148	0	0	Absent	NO_DUP_NO_DEL	NA	NA	NA	NA	0.742647	0.521571	NA	NA	NA	NA	22242.4	22242.4	606731.3	NONE
2	17585118	17590610	esv3589944	NONE	0.300926	0.0555556	0.0582524	Absent	NO_DUP_NO_DEL	NA	NA	NA	NA	-0.528843	-0.85878	-0.648859	-1.247615	3.197515	0.527822	73320.6	55247.6	872895.45	NONE
2	18118862	18120016	esv3589953	NONE	0.138889	0.0858586	0.0970874	Absent	NO_DUP_NO_DEL	NA	NA	NA	NA	0.931937	-0.6311	0.489019	-0.992548	0.459789	-0.618791	28208.4	28140.5	694046.15	NONE
2	18435638	18438983	esv3589961	NONE	0.00925926	0	0	Absent	NO_DUP_NO_DEL	NA	NA	NA	NA	1.498004	1.498004	NA	NA	NA	NA	467.801	467.801	NA	NONE
2	19002864	19003361	esv3589974	NONE	0.0138889	0.191919	0.466019	Absent	NO_DUP_NO_DEL	NA	NA	NA	NA	-0.135937	-0.40508	0.312622	-0.554601	0.706301	-0.681982	20180.6	15936.3	375042.64	NONE
2	19767565	19770555	esv3589987	NONE	0.217593	0.146465	0.0485437	Absent	NO_DUP_NO_DEL	NA	NA	NA	NA	1.078594	0.083367	6.521137	-0.37732	8.262051	-0.382246	33502.3	22823.7	607251.47	NONE
2	19987243	19987832	esv3589989	NONE	0.0185185	0	0	Absent	NO_DUP_NO_DEL	NA	NA	NA	NA	0.551013	-0.739141	NA	NA	NA	NA	1139.1	1025.13	NA	NONE
2	22307060	22308447	esv3590031	NONE	0.00925926	0	0	Absent	NO_DUP_NO_DEL	NA	NA	NA	NA	2.645232	2.645232	NA	NA	NA	NA	3639.72	1436.38	16911.006	NONE
2	22688399	22690107	esv3590042	NONE	0.12963	0.010101	0	Absent	NO_DUP_NO_DEL	NA	NA	NA	NA	1.420659	-0.338702	1.247688	-0.817584	NA	NA	32686	8769.22	442434.72	NONE
2	24547080	24548453	esv3590066	NONE	0.00925926	0	0	Absent	NO_DUP_NO_DEL	NA	NA	NA	NA	5.145743	2.504742	NA	NA	NA	NA	824.812	700.258	NA	NONE
2	24599970	24611523	esv3590068	NONE	0.0416667	0.0353535	0.0145631	Absent	NO_DUP_NO_DEL	NA	NA	NA	NA	4.699378	4.699378	5.131555	4.948143	7.819324	7.798777	2081.54	2028.86	129835.72	NONE
2	25052369	25052987	esv3590077	NONE	0.0231481	0.0454545	0	Absent	NO_DUP_NO_DEL	NA	NA	NA	NA	1.671132	0.60158	0.441711	0.441711	NA	NA	8172.47	7363.52	168390.6467	NONE
2	26376086	26378869	esv3590111	NONE	0.0462963	0	0	Absent	NO_DUP_NO_DEL	NA	NA	NA	NA	-0.577127	-0.577127	NA	NA	NA	NA	29365.9	29365.9	NA	NONE
2	26893489	26895041	esv3590126	NONE	0.0138889	0	0	Absent	NO_DUP_NO_DEL	NA	NA	NA	NA	-0.240369	-0.240369	NA	NA	NA	NA	821.869	821.869	NA	NONE
2	27765315	27778835	esv3590142	NONE	0.0138889	0	0	Absent	NO_DUP_NO_DEL	NA	NA	NA	NA	-0.159101	-0.159101	NA	NA	NA	NA	1131.74	1091.9	166121.9	NONE
2	28720773	28721321	esv3590161	NONE	0	0.020202	0	Absent	NO_DUP_NO_DEL	NA	NA	NA	NA	NA	NA	-1.332932	-1.332932	NA	NA	1575.51	1126.08	NA	NONE
2	29641655	29645379	esv3590179	NONE	0.0740741	0	0	Absent	NO_DUP_NO_DEL	NA	NA	NA	NA	-0.241547	-0.241547	NA	NA	NA	NA	2769.14	2769.14	NA	NONE
2	29957890	29963375	esv3590189	NONE	0.0185185	0	0	Absent	NO_DUP_NO_DEL	NA	NA	NA	NA	0.987252	-0.092518	NA	NA	NA	NA	6868.71	4327.46	NA	NONE
2	30607638	30608490	esv3590197	NONE	0.0138889	0	0	Absent	NO_DUP_NO_DEL	NA	NA	NA	NA	2.753768	2.683426	NA	NA	NA	NA	1097.79	1097.79	61585.069	NONE
2	31709968	31710919	esv3590220	NONE	0.0138889	0	0	Absent	DEL_OR_PARTIAL_DEL	NA	NA	NA	NA	1.284724	-0.428341	NA	NA	NA	NA	972.195	972.195	NA	NONE
2	32478859	32480414	esv3590244	NONE	0.0324074	0	0	Absent	DUP	NA	NA	NA	NA	0.6762	0.6762	NA	NA	NA	NA	2832.47	2832.47	NA	NONE
2	33224462	33227296	esv3590271	NONE	0.143519	0.29798	0.606796	Absent	NO_DUP_NO_DEL	NA	NA	NA	NA	0.678216	0.02105	0.985613	-0.011984	1.74853	1.74853	26725.9	22962.7	359323.02	NONE
2	34523576	34525669	esv3590324	NONE	0.37963	0.489899	0.834951	Absent	NO_DUP_NO_DEL	NA	NA	NA	NA	0.501924	0.464381	1.775502	1.197774	1.704456	-0.164807	45936	45936	1216415.2	NONE
2	34826730	34829313	esv3590341	NONE	0.0462963	0	0	Absent	NO_DUP_NO_DEL	NA	NA	NA	NA	-0.824635	-0.824635	NA	NA	NA	NA	9988.64	9988.64	31512.46	NONE
2	34965683	34967221	esv3590344	NONE	0	0.0909091	0	Absent	NO_DUP_NO_DEL	NA	NA	NA	NA	NA	NA	2.06588	2.06588	NA	NA	1385.24	1385.24	100824.92	NONE
2	35257431	35259930	esv3590349	NONE	0	0.030303	0	Absent	NO_DUP_NO_DEL	NA	NA	NA	NA	NA	NA	0.115768	0.115768	NA	NA	954.415	954.415	35196.434	NONE
2	35581372	35616477	esv3590361	NONE	0.0324074	0	0	Absent	NO_DUP_NO_DEL	NA	NA	NA	NA	-0.282705	-0.282705	NA	NA	NA	NA	3819.54	3819.54	250012.406	NONE
2	35975766	35997215	esv3590373	NONE	0.550926	0.520202	0.417476	Absent	DUP	NA	NA	NA	NA	2.944132	2.944132	4.844989	4.844989	5.076794	5.076794	53139.2	46493.1	1215274.631	NONE
2	36057900	36058763	esv3590375	NONE	0	0	0.00970874	Absent	NO_DUP_NO_DEL	NA	NA	NA	NA	NA	NA	NA	NA	6.081392	1.052977	447.275	441.389	NA	NONE
2	36332570	36342899	esv3590383	NONE	0.0277778	0.00505051	0.116505	Absent	NO_DUP_NO_DEL	NA	NA	NA	NA	-0.777863	-0.777863	NA	NA	-0.844269	-0.844269	15321.7	15321.7	228239.48	NONE
2	36820315	36821565	esv3590396	NONE	0	0	0.116505	Absent	NO_DUP_NO_DEL	NA	NA	NA	NA	NA	NA	NA	NA	-0.055292	-0.055292	2658.15	2658.15	28015.932	NONE
2	36836097	36840730	esv3590397	NONE	0.00925926	0	0	Absent	NO_DUP_NO_DEL	NA	NA	NA	NA	0.02122	-0.008086	NA	NA	NA	NA	489.58	298.194	NA	NONE
2	38185474	38187125	esv3590412	NONE	0.162037	0	0	Absent	NO_DUP_NO_DEL	NA	NA	NA	NA	0.936843	-0.02998	NA	NA	NA	NA	15650	10059.5	58257.3824	NONE
2	38464204	38465745	esv3590414	NONE	0.00925926	0	0	Absent	NO_DUP_NO_DEL	NA	NA	NA	NA	-0.822441	-0.822441	NA	NA	NA	NA	363.987	363.987	21700.784	NONE
2	38871926	38882398	esv3590418	NONE	0.0555556	0	0	Absent	NO_DUP_NO_DEL	NA	NA	NA	NA	1.229979	-0.817751	NA	NA	NA	NA	36885.1	23042.4	501547.32	NONE
2	38944839	38947071	esv3590420	NONE	0	0	0.0631068	Absent	NO_DUP_NO_DEL	NA	NA	NA	NA	NA	NA	NA	NA	2.389534	-2.228057	25140.2	1981.4	473555.4699	NONE
2	39712308	39712947	esv3590434	NONE	0.087963	0	0	Absent	NO_DUP_NO_DEL	NA	NA	NA	NA	-0.417643	-0.417643	NA	NA	NA	NA	2893.65	2893.65	29229.34	NONE
2	40612175	40614948	esv3590458	NONE	0.0972222	0	0	Absent	NO_DUP_NO_DEL	NA	NA	NA	NA	3.037484	3.037484	NA	NA	NA	NA	25837.3	9232.09	65994.72367	NONE
2	40861335	40862832	esv3590466	NONE	0.0138889	0	0	Absent	NO_DUP_NO_DEL	NA	NA	NA	NA	1.525126	-0.225372	NA	NA	NA	NA	6035.52	2400.61	NA	NONE
2	40926903	40949428	esv3590469	NONE	0	0	0.0291262	Absent	NO_DUP_NO_DEL	NA	NA	NA	NA	NA	NA	NA	NA	1.921289	-0.69003	925.117	868.541	31088.40233	NONE
2	41238373	41250303	esv3590473	NONE	0.24537	0.0505051	0.0776699	Absent	NO_DUP_NO_DEL	NA	NA	NA	NA	0.066987	0.066987	0.80501	-0.856593	0.28993	-0.560808	29095.3	29095.3	259077.4667	NONE
2	41638881	41639630	esv3590477	NONE	0.0138889	0	0	Absent	NO_DUP_NO_DEL	NA	NA	NA	NA	0.140644	0.140644	NA	NA	NA	NA	876.716	876.716	NA	NONE
2	41921735	41923047	esv3590484	NONE	0.0185185	0	0	Absent	NO_DUP_NO_DEL	NA	NA	NA	NA	2.632686	1.209455	NA	NA	NA	NA	4991.5	3491.23	109911.13	NONE
2	42005984	42009535	esv3590489	NONE	0.0231481	0	0	Absent	NO_DUP_NO_DEL	NA	NA	NA	NA	1.12636	0.127028	NA	NA	NA	NA	31428.2	1608.34	59445.238	NONE
2	42346265	42347320	esv3590498	NONE	0.277778	0.479798	0.257282	Absent	NO_DUP_NO_DEL	NA	NA	NA	NA	-0.300399	-0.300399	-0.666404	-0.666404	-0.36384	-0.36384	49159.3	49159.3	427760.2	NONE
2	42446866	42453609	esv3590500	NONE	0	0.010101	0	Absent	NO_DUP_NO_DEL	NA	NA	NA	NA	NA	NA	-0.422129	-0.422129	NA	NA	1204.79	1204.79	NA	NONE
2	42852272	42853549	esv3590508	NONE	0.0509259	0	0	Absent	NO_DUP_NO_DEL	NA	NA	NA	NA	2.52244	0.996117	NA	NA	NA	NA	44321.5	3151.58	197292.9546	NONE
2	43230818	43231517	esv3590517	NONE	0	0	0.00970874	Absent	NO_DUP_NO_DEL	NA	NA	NA	NA	NA	NA	NA	NA	1.965305	1.965305	2394.43	940.603	51074.9085	NONE
2	44308491	44308817	esv3590547	NONE	0.425926	0.00505051	0.0436893	Ancient	NO_DUP_NO_DEL	NA	NA	NA	NA	1.067191	1.067191	2.203762	2.160957	1.604848	1.550553	50894.9	48664.5	1791482	NONE
2	44318540	44321217	esv3590548	NONE	0	0	0.0436893	Absent	NO_DUP_NO_DEL	NA	NA	NA	NA	NA	NA	NA	NA	NA	NA	NA	NA	NA	NONE
2	44467103	44468828	esv3590550	NONE	0.0185185	0.191919	0.160194	Absent	NO_DUP_NO_DEL	NA	NA	NA	NA	2.105322	-0.28452	2.912005	-0.570511	2.613767	-0.769588	38840.7	3006.54	366162.08	NONE
2	44825028	44830283	esv3590565	NONE	0.0324074	0	0	Absent	NO_DUP_NO_DEL	NA	NA	NA	NA	0.566133	0.007258	NA	NA	NA	NA	32350.8	15594.2	145559.981	NONE
2	47152564	47158902	esv3590619	NONE	0	0	0.00970874	Absent	NO_DUP_NO_DEL	NA	NA	NA	NA	NA	NA	NA	NA	-1.421983	-1.421983	271.544	271.544	NA	NONE
2	48851155	48857938	esv3590656	NONE	0.0416667	0.237374	0.0631068	Absent	NO_DUP_NO_DEL	NA	NA	NA	NA	2.989787	0.158057	3.048168	1.100596	5.922323	1.15566	33220.3	2837.74	718542.2662	NONE
2	49532573	49542423	esv3590687	NONE	0	0.0505051	0.218447	Absent	NO_DUP_NO_DEL	NA	NA	NA	NA	NA	NA	-0.436699	-0.615193	0.710547	-0.479409	36883.1	3661.57	240117.92	NONE
2	50134710	50135566	esv3590708	NONE	0.0138889	0	0	Absent	NO_DUP_NO_DEL	NA	NA	NA	NA	1.807098	1.679555	NA	NA	NA	NA	27664.9	22627.2	NA	NONE
2	50480975	50481759	esv3590720	NONE	0.0277778	0	0	Absent	NO_DUP_NO_DEL	NA	NA	NA	NA	0.238794	-0.227571	NA	NA	NA	NA	2240.66	1982.5	NA	NONE
2	51224545	51225541	esv3590744	NONE	0.449074	0.10101	0.092233	Absent	NO_DUP_NO_DEL	NA	NA	NA	NA	0.280475	-0.573891	0.815797	0.815797	1.033566	1.033566	28227.2	25866.7	315448.7	NONE
2	51298425	51337653	esv3590745	NONE	0.00925926	0	0	Absent	NO_DUP_NO_DEL	NA	NA	NA	NA	-0.065559	-1.031034	NA	NA	NA	NA	1373.51	1373.51	NA	NONE
2	51433377	51435551	esv3590752	NONE	0.0416667	0	0	Ancient	NO_DUP_NO_DEL	NA	NA	NA	NA	2.705545	2.618018	NA	NA	NA	NA	35933.7	35825.3	1629985.928	NONE
2	51504564	51507674	esv3590755	NONE	0.0277778	0	0	Absent	NO_DUP_NO_DEL	NA	NA	NA	NA	4.008038	0.365178	NA	NA	NA	NA	13047.4	12646.1	NA	NONE
2	51543787	51545507	esv3590756	NONE	0.0324074	0	0	Absent	NO_DUP_NO_DEL	NA	NA	NA	NA	1.272534	0.54069	NA	NA	NA	NA	9963.48	7850.78	NA	NONE
2	51926595	51927817	esv3590770	NONE	0	0.116162	0	Absent	NO_DUP_NO_DEL	NA	NA	NA	NA	NA	NA	2.807306	1.109851	NA	NA	1433.68	1386.28	56843.08	NONE
2	51973822	51974238	esv3590772	NONE	0.148148	0.19697	0.291262	Absent	NO_DUP_NO_DEL	NA	NA	NA	NA	1.485755	1.168469	1.21637	1.21637	1.651785	1.651785	52614.6	20203	480541.32	NONE
2	53249410	53252623	esv3590809	NONE	0.0740741	0	0.0339806	Absent	NO_DUP_NO_DEL	NA	NA	NA	NA	1.440697	0.379007	NA	NA	2.447774	-2.664303	3379.18	3169.19	481461.94	NONE
2	53489816	53491886	esv3590819	NONE	0.0185185	0	0	Absent	NO_DUP_NO_DEL	NA	NA	NA	NA	0.706106	0.706106	NA	NA	NA	NA	1318.82	982.242	NA	NONE
2	54513084	54517809	esv3590836	NONE	0.0277778	0	0	Absent	NO_DUP_NO_DEL	NA	NA	NA	NA	0.441855	0.441855	NA	NA	NA	NA	2510.92	2510.92	24664.64	NONE
2	55323852	55336816	esv3590851	NONE	0.00925926	0	0	Absent	NO_DUP_NO_DEL	NA	NA	NA	NA	2.511885	1.786332	NA	NA	NA	NA	13015.2	1424.13	106862.7675	NONE
2	55634246	55636188	esv3590855	NONE	0.00925926	0	0	Absent	NO_DUP_NO_DEL	NA	NA	NA	NA	0.025715	-0.359555	NA	NA	NA	NA	1687.47	1687.47	34729.38	NONE
2	56652306	56655874	esv3590885	NONE	0.236111	0.474747	0.626214	Absent	NO_DUP_NO_DEL	NA	NA	NA	NA	0.877533	0.137364	3.882932	3.212527	3.67649	3.024665	15690	6573.52	408612.1947	NONE
2	56828123	56829864	esv3590892	NONE	0	0.010101	0	Absent	NO_DUP_NO_DEL	NA	NA	NA	NA	NA	NA	0.317215	-1.244365	NA	NA	1578.75	830.455	NA	NONE
2	57242150	57245233	esv3590907	NONE	0.0925926	0	0	Absent	NO_DUP_NO_DEL	NA	NA	NA	NA	2.921632	0.070985	NA	NA	NA	NA	31843.7	9477.86	421350.4858	NONE
2	57579801	57581980	esv3590931	NONE	0.101852	0.00505051	0	Absent	NO_DUP_NO_DEL	NA	NA	NA	NA	2.880801	-0.272785	NA	NA	NA	NA	19963.7	4551.21	227630.5273	NONE
2	58204652	58206770	esv3590951	NONE	0.0925926	0	0	Absent	NO_DUP_NO_DEL	NA	NA	NA	NA	1.709619	0.250506	NA	NA	NA	NA	27791.7	9175.46	451020.4337	NONE
2	58444217	58447306	esv3590956	NONE	0.0185185	0	0	Absent	NO_DUP_NO_DEL	NA	NA	NA	NA	2.040584	-0.025416	NA	NA	NA	NA	10554.1	10041.1	67624.06	NONE
2	61281769	61285763	esv3591011	NONE	0.0416667	0	0	Absent	NO_DUP_NO_DEL	NA	NA	NA	NA	0.973208	-0.165921	NA	NA	NA	NA	4233.63	4120.08	NA	NONE
2	62119680	62120675	esv3591028	NONE	0.0462963	0	0	Absent	NO_DUP_NO_DEL	NA	NA	NA	NA	-0.317665	-0.317665	NA	NA	NA	NA	1647.31	1647.31	NA	NONE
2	62350454	62351259	esv3591034	NONE	0.0231481	0	0	Absent	NO_DUP_NO_DEL	NA	NA	NA	NA	0.235891	-2.861433	NA	NA	NA	NA	30213.7	26242.2	353984.54	NONE
2	62483218	62483687	esv3591036	NONE	0.0694444	0	0	Ancient	NO_DUP_NO_DEL	NA	NA	NA	NA	4.051582	3.06146	NA	NA	NA	NA	21564.4	19680.2	NA	NONE
2	62611754	62614753	esv3591039	NONE	0.0185185	0	0	Absent	NO_DUP_NO_DEL	NA	NA	NA	NA	0.150344	0.104662	NA	NA	NA	NA	3902.57	3902.57	NA	NONE
2	64046397	64053516	esv3591065	NONE	0	0.010101	0	Absent	NO_DUP_NO_DEL	NA	NA	NA	NA	NA	NA	-0.493946	-0.493946	NA	NA	885.948	773.856	NA	NONE
2	65195683	65198992	esv3591089	NONE	0.0138889	0	0	Absent	NO_DUP_NO_DEL	NA	NA	NA	NA	2.52943	0.892101	NA	NA	NA	NA	1126.36	744.509	167575.569	NONE
2	65512669	65517512	esv3591098	NONE	0	0	0.0145631	Absent	NO_DUP_NO_DEL	NA	NA	NA	NA	NA	NA	NA	NA	3.228215	3.228215	437.479	437.479	79668.26	NONE
2	66008571	66009735	esv3591102	NONE	0	0	0.0970874	Introgressed	NO_DUP_NO_DEL	NA	NA	NA	NA	NA	NA	NA	NA	1.551941	0.909099	2836.95	2414.16	453021.2938	NONE
2	66185959	66197057	esv3591108	NONE	0	0.0757576	0.00485437	Absent	NO_DUP_NO_DEL	NA	NA	NA	NA	NA	NA	1.416789	1.416789	0.863506	0.863506	2559.75	1134.6	61308.1	NONE
2	66505568	66507543	esv3591113	NONE	0.037037	0.19697	0.228155	Ancient	NO_DUP_NO_DEL	NA	NA	NA	NA	3.291744	1.093713	4.907146	4.503933	5.194583	4.677109	27375.8	2689.64	167014.05	NONE
2	66978403	66983517	esv3591128	NONE	0	0.0151515	0	Absent	NO_DUP_NO_DEL	NA	NA	NA	NA	NA	NA	-1.589861	-1.589861	NA	NA	321.577	321.577	17327.73	NONE
2	67324274	67329189	esv3591142	NONE	0	0	0.038835	Absent	NO_DUP_NO_DEL	NA	NA	NA	NA	NA	NA	NA	NA	0.4169	0.4169	1335.04	1335.04	49904.134	NONE
2	67612188	67613283	esv3591148	NONE	0.0185185	0	0	Absent	NO_DUP_NO_DEL	NA	NA	NA	NA	1.164382	0.423175	NA	NA	NA	NA	17879.2	14577	NA	NONE
2	68709992	68716288	esv3591169	NONE	0.00925926	0	0	Absent	NO_DUP_NO_DEL	NA	NA	NA	NA	4.17467	4.17467	NA	NA	NA	NA	779.042	727.296	NA	NONE
2	69215796	69217346	esv3591174	NONE	0.0324074	0	0	Absent	NO_DUP_NO_DEL	NA	NA	NA	NA	1.383061	1.057709	NA	NA	NA	NA	11352.4	2330.21	26512.99	NONE
2	70988633	70992378	esv3591211	NONE	0.037037	0	0	Absent	NO_DUP_NO_DEL	NA	NA	NA	NA	2.069036	0.476509	NA	NA	NA	NA	5389.78	5389.78	89560.401	NONE
2	71318596	71321827	esv3591222	NONE	0.0277778	0	0	Absent	NO_DUP_NO_DEL	NA	NA	NA	NA	3.492028	-0.673742	NA	NA	NA	NA	12019.1	10086.8	85565.34	NONE
2	73106151	73108626	esv3591252	NONE	0	0	0.00970874	Absent	NO_DUP_NO_DEL	NA	NA	NA	NA	NA	NA	NA	NA	NA	NA	565.347	565.347	NA	NONE
2	73983143	73984310	esv3591269	NONE	0	0	0.00970874	Absent	NO_DUP_NO_DEL	NA	NA	NA	NA	NA	NA	NA	NA	-0.10331	-0.368622	484.103	321.577	NA	NONE
2	74677137	74679264	esv3591282	NONE	0.0231481	0.00505051	0	Absent	NO_DUP_NO_DEL	NA	NA	NA	NA	3.534158	-0.63597	4.886062	-0.356304	NA	NA	13362.1	13362.1	478297.26	NONE
2	75908442	75910645	esv3591304	NONE	0.0231481	0	0	Absent	NO_DUP_NO_DEL	NA	NA	NA	NA	-0.671288	-0.671288	NA	NA	NA	NA	4753.08	4753.08	6998.81	NONE
2	76336914	76338115	esv3591313	NONE	0.0324074	0	0	Absent	NO_DUP_NO_DEL	NA	NA	NA	NA	4.681177	0.614755	NA	NA	NA	NA	35971.5	6366.08	292762.3533	NONE
2	76557061	76557292	esv3591320	NONE	0.226852	0.727273	0.582524	Absent	NO_DUP_NO_DEL	NA	NA	NA	NA	2.272717	-0.363748	2.796143	-1.46364	2.418998	-1.456985	23374.9	22923.2	572885.6	NONE
2	76773559	76775450	esv3591324	NONE	0.800926	0.747475	0.757282	Ancient	NO_DUP_NO_DEL	NA	NA	NA	NA	4.337203	1.547973	5.313284	1.563561	5.852243	1.517064	62639.6	54731	1878654.435	NONE
2	76844767	76845509	esv3591327	NONE	0	0.116162	0.0291262	Absent	NO_DUP_NO_DEL	NA	NA	NA	NA	NA	NA	-0.980903	-0.980903	-1.151599	-1.151599	3687.54	3687.54	117127.57	NONE
2	77100652	77102037	esv3591340	NONE	0.0185185	0	0	Absent	NO_DUP_NO_DEL	NA	NA	NA	NA	0.509518	0.261443	NA	NA	NA	NA	4745.06	3636.39	466902.45	NONE
2	77363854	77364654	esv3591350	NONE	0.0555556	0	0	Absent	NO_DUP_NO_DEL	NA	NA	NA	NA	0.964018	-0.711012	NA	NA	NA	NA	12392.9	10618.1	NA	NONE
2	77657685	77659039	esv3591354	NONE	0.236111	0	0	Absent	NO_DUP_NO_DEL	NA	NA	NA	NA	-0.0059	-0.0059	NA	NA	NA	NA	26058.1	25186.2	218182.02	NONE
2	78117886	78118362	esv3591362	NONE	0.287037	0.459596	0.796117	Absent	NO_DUP_NO_DEL	NA	NA	NA	NA	1.098852	1.098852	2.00153	2.00153	4.273243	3.21201	36484.6	31914.4	961947.2333	NONE
2	78426993	78427962	esv3591370	NONE	0.0324074	0	0	Absent	NO_DUP_NO_DEL	NA	NA	NA	NA	2.849816	-0.521118	NA	NA	NA	NA	3430.51	3136.25	172222.2266	NONE
2	79076573	79081208	esv3591397	NONE	0.106481	0.212121	0.237864	Absent	NO_DUP_NO_DEL	NA	NA	NA	NA	0.758638	0.758638	1.162545	0.02165	0.71714	-0.12488	22815.5	5822.58	452564.63	NONE
2	79331382	79339676	esv3591404	NONE	0.0462963	0	0	Absent	NO_DUP_NO_DEL	NA	NA	NA	NA	NA	NA	NA	NA	NA	NA	1640.43	1640.43	NA	NONE
2	80679286	80680057	esv3591423	NONE	0.0972222	0.00505051	0	Absent	NO_DUP_NO_DEL	NA	NA	NA	NA	0.163111	0.163111	-0.554323	-0.554323	NA	NA	6691.52	4057.42	242911.62	NONE
2	81073403	81074059	esv3591436	NONE	0.0138889	0	0	Absent	NO_DUP_NO_DEL	NA	NA	NA	NA	1.102012	1.102012	NA	NA	NA	NA	883.521	883.521	NA	NONE
2	81584261	81584988	esv3591444	NONE	0.0277778	0	0	Absent	NO_DUP_NO_DEL	NA	NA	NA	NA	-0.111379	-0.111379	NA	NA	NA	NA	5095.63	2249.81	42264.32	NONE
2	81812092	81816817	esv3591448	NONE	0.037037	0	0	Absent	NO_DUP_NO_DEL	NA	NA	NA	NA	1.416499	-0.427494	NA	NA	NA	NA	20318.7	20318.7	240479.2507	NONE
2	82092083	82092895	esv3591453	NONE	0.0138889	0	0	Absent	NO_DUP_NO_DEL	NA	NA	NA	NA	2.914141	0.434269	NA	NA	NA	NA	6300.61	5178.92	226064.706	NONE
2	82877077	82879090	esv3591479	NONE	0.0185185	0	0	Absent	NO_DUP_NO_DEL	NA	NA	NA	NA	-0.702053	-0.702053	NA	NA	NA	NA	731.258	731.258	12189.184	NONE
2	83035655	83036422	esv3591480	NONE	0.208333	0.19697	0.276699	Absent	NO_DUP_NO_DEL	NA	NA	NA	NA	0.956313	0.956313	0.861902	0.861902	1.663035	-1.382314	33914.2	19695.5	313586.308	NONE
2	84298252	84299363	esv3591505	NONE	0.0601852	0	0	Absent	NO_DUP_NO_DEL	NA	NA	NA	NA	0.560323	-0.080317	NA	NA	NA	NA	3815.31	3097.81	94493.252	NONE
2	85941275	85944943	esv3591535	NONE	0	0	0.00970874	Introgressed	NO_DUP_NO_DEL	NA	NA	NA	NA	NA	NA	NA	NA	1.264966	0.697858	40610.7	2245.64	465125.2184	NONE
2	86209200	86214487	esv3591536	NONE	0.0277778	0	0	Absent	NO_DUP_NO_DEL	NA	NA	NA	NA	-0.229548	-0.229548	NA	NA	NA	NA	57882.3	57882.3	NA	NONE
2	88317645	88319383	esv3591583	NONE	0.0185185	0	0	Absent	NO_DUP_NO_DEL	NA	NA	NA	NA	1.695557	-0.089082	NA	NA	NA	NA	2350.71	2127.85	11314.0545	NONE
2	88821903	88822498	esv3591590	NONE	0.143519	0.156566	0.184466	Ancient	NO_DUP_NO_DEL	NA	NA	NA	NA	2.34673	2.34673	1.703178	1.606983	1.39432	1.032033	35003.8	28493.6	1454693.063	NONE
2	92071673	92073888	esv3591641	NONE	0	0	0.00970874	Absent	DUP	NA	NA	NA	NA	NA	NA	NA	NA	NA	NA	2892.28	2892.28	NA	NONE
2	95730614	95737180	esv3591664	NONE	0	0	0.0291262	Absent	NO_DUP_NO_DEL	NA	NA	NA	NA	NA	NA	NA	NA	-3.89127	-3.89127	990.8	990.8	24629.948	NONE
2	95936359	95938301	esv3591666	NONE	0.0231481	0	0	Absent	NO_DUP_NO_DEL	NA	NA	NA	NA	3.157756	3.157756	NA	NA	NA	NA	1334.71	1063.91	NA	NONE
2	98544769	98547877	esv3591721	NONE	0.0833333	0	0	Absent	NO_DUP_NO_DEL	NA	NA	NA	NA	0.376061	0.181744	NA	NA	NA	NA	3048.92	1948.46	67072.94533	NONE
2	100103689	100105021	esv3591737	NONE	0.351852	0.424242	0.330097	Ancient	NO_DUP_NO_DEL	NA	NA	NA	NA	1.780489	-0.685897	3.042309	-0.85864	2.618382	-0.61597	70237.7	44592.6	932865.5538	NONE
2	102232538	102233564	esv3591773	NONE	0.111111	0.136364	0.0291262	Absent	NO_DUP_NO_DEL	NA	NA	NA	NA	1.533192	-0.316144	1.33654	-0.965563	1.000271	-0.67954	10083.5	1913.41	745788.5096	NONE
2	103109644	103110900	esv3591793	NONE	0.0231481	0	0	Absent	NO_DUP_NO_DEL	NA	NA	NA	NA	1.714202	0.114066	NA	NA	NA	NA	13543.6	5322.98	188860.7323	NONE
2	105207930	105208705	esv3591818	NONE	0.0138889	0.00505051	0	Ancient	NO_DUP_NO_DEL	NA	NA	NA	NA	0.098478	0.098478	0.803142	0.803142	NA	NA	10283.3	10283.3	662855.2	NONE
2	106347794	106353319	esv3591835	NONE	0	0.010101	0	Absent	NO_DUP_NO_DEL	NA	NA	NA	NA	NA	NA	-1.363972	-1.363972	NA	NA	287.921	287.921	NA	NONE
2	106438730	106440738	esv3591844	NONE	0.037037	0	0	Absent	NO_DUP_NO_DEL	NA	NA	NA	NA	2.434154	-0.484336	NA	NA	NA	NA	6974.01	1944.84	205163.8974	NONE
2	106694799	106696035	esv3591851	NONE	0.467593	0.454545	0.480583	Absent	NO_DUP_NO_DEL	NA	NA	NA	NA	0.131554	0.131554	0.173897	0.173897	0.508579	0.508579	29476.7	27398.6	513896.6	NONE
2	106695055	106695893	esv3591852	NONE	0.467593	0.454545	0.480583	Absent	NO_DUP_NO_DEL	NA	NA	NA	NA	0.131554	0.131554	0.173897	0.173897	0.508579	0.508579	29476.7	27398.6	513896.6	NONE
2	106695492	106695752	esv3591853	NONE	0.472222	0.454545	0.480583	Absent	NO_DUP_NO_DEL	NA	NA	NA	NA	0.131554	0.131554	0.173897	0.173897	0.508579	0.508579	29476.7	27398.6	513896.6	NONE
2	107899178	107903913	esv3591890	NONE	0.037037	0	0	Absent	NO_DUP_NO_DEL	NA	NA	NA	NA	5.40413	0.551191	NA	NA	NA	NA	9122.22	1701.32	167817.6395	NONE
2	108183222	108184702	esv3591901	NONE	0.00925926	0	0	Absent	NO_DUP_NO_DEL	NA	NA	NA	NA	NA	NA	NA	NA	NA	NA	NA	NA	NA	NONE
2	108275314	108279104	esv3591906	NONE	0.171296	0.0909091	0.11165	Absent	NO_DUP_NO_DEL	NA	NA	NA	NA	0.615877	-0.61822	6.253716	1.063648	-0.078404	-0.36833	37079.9	36981.4	382588.192	NONE
2	108855423	108856274	esv3591922	NONE	0.263889	0.424242	0.0825243	Ancient	NO_DUP_NO_DEL	NA	NA	NA	NA	NA	NA	NA	NA	NA	NA	27669.5	27669.5	NA	NONE
2	109307890	109311178	esv3591930	NONE	0.0185185	0	0	Absent	NO_DUP_NO_DEL	NA	NA	NA	NA	NA	NA	NA	NA	NA	NA	2702.94	2510.08	NA	NONE
2	109689981	109695337	esv3591938	NONE	0	0.0808081	0	Absent	NO_DUP_NO_DEL	NA	NA	NA	NA	NA	NA	-0.103855	-0.388707	NA	NA	1090.97	1066.69	172316.2	NONE
2	111576391	111576633	esv3591972	NONE	0.0555556	0.479798	0.383495	Absent	NO_DUP_NO_DEL	NA	NA	NA	NA	-0.347003	-0.347003	-1.616311	-1.616311	-2.218147	-2.218147	26560.5	26560.5	NA	NONE
2	114570369	114572849	esv3592037	NONE	0	0	0.0194175	Absent	NO_DUP_NO_DEL	NA	NA	NA	NA	NA	NA	NA	NA	-0.782801	-0.82151	1089.36	1089.36	12833.86533	NONE
2	115628104	115628838	esv3592059	NONE	0.185185	0.232323	0.597087	Absent	NO_DUP_NO_DEL	NA	NA	NA	NA	-0.665529	-0.939456	-1.383297	-2.234461	0.182179	-2.072887	23992.5	20501.4	272748	NONE
2	116501213	116503407	esv3592071	NONE	0	0.0353535	0	Absent	NO_DUP_NO_DEL	NA	NA	NA	NA	NA	NA	-0.69818	-1.883735	NA	NA	1214.25	1188.84	116163.74	NONE
2	116662058	116662652	esv3592077	NONE	0.101852	0.0959596	0.106796	Absent	NO_DUP_NO_DEL	NA	NA	NA	NA	0.075349	-0.556982	0.608339	-2.072886	0.458621	-1.500626	45985.7	45985.7	925628.04	NONE
2	118881398	118882286	esv3592149	NONE	0.00925926	0.0454545	0	Absent	NO_DUP_NO_DEL	NA	NA	NA	NA	-0.647327	-0.647327	0.371248	0.371248	NA	NA	3245.63	3245.63	291621.68	NONE
2	119653321	119659377	esv3592161	NONE	0.393519	0.151515	0.674757	Absent	DEL_OR_PARTIAL_DEL	NA	NA	NA	NA	5.208838	4.407054	9.558357	7.701186	6.492609	4.707986	39841.5	35285.3	2474769.88	NONE
2	120045608	120050535	esv3592165	NONE	0	0	0.0194175	Absent	NO_DUP_NO_DEL	NA	NA	NA	NA	NA	NA	NA	NA	-0.192681	-0.438549	1937.63	1923.61	NA	NONE
2	121137206	121140705	esv3592177	NONE	0	0.040404	0	Absent	NO_DUP_NO_DEL	NA	NA	NA	NA	NA	NA	4.763534	4.763534	NA	NA	664.781	664.781	NA	NONE
2	121427316	121428119	esv3592183	NONE	0	0	0.00970874	Absent	NO_DUP_NO_DEL	NA	NA	NA	NA	NA	NA	NA	NA	-2.242789	-2.242789	423.345	423.345	NA	NONE
2	121797802	121798397	esv3592195	NONE	0.277778	0.722222	0.543689	Absent	NO_DUP_NO_DEL	NA	NA	NA	NA	5.600107	2.208011	9.957855	5.174913	9.201135	4.556593	22485.9	7376.39	2769290.83	NONE
2	122056855	122058006	esv3592202	NONE	0.481481	0.0505051	0.00485437	Absent	NO_DUP_NO_DEL	NA	NA	NA	NA	1.100193	-0.121774	5.199172	1.721213	2.032122	0.344959	33707.2	29299.2	529617.13	NONE
2	122092147	122093716	esv3592205	NONE	0.0277778	0	0	Absent	NO_DUP_NO_DEL	NA	NA	NA	NA	2.02851	-0.337408	NA	NA	NA	NA	22978.6	6796.94	111128.8967	NONE
2	123364885	123365367	esv3592236	NONE	0.0694444	0.621212	0.684466	Ancient	NO_DUP_NO_DEL	NA	NA	NA	NA	2.724351	0.055469	6.83524	1.558144	8.919178	2.836687	24709.1	23815.6	1623408.025	NONE
2	123477289	123482545	esv3592238	NONE	0.0555556	0.131313	0.373786	Absent	NO_DUP_NO_DEL	NA	NA	NA	NA	0.903589	0.263138	1.539733	0.983865	4.770599	2.6984	37677.6	13726.5	423905.272	NONE
2	124843831	124845469	esv3592274	NONE	0.0509259	0	0	Absent	NO_DUP_NO_DEL	NA	NA	NA	NA	1.920592	-0.334296	NA	NA	NA	NA	3076.67	2475.06	266144.6521	NONE
2	126108118	126111000	esv3592302	NONE	0.00925926	0	0	Absent	NO_DUP_NO_DEL	NA	NA	NA	NA	4.459988	2.21698	NA	NA	NA	NA	3370.48	1191.41	8692.684	NONE
2	126187090	126187654	esv3592306	NONE	0.0185185	0	0	Absent	NO_DUP_NO_DEL	NA	NA	NA	NA	1.521547	1.521547	NA	NA	NA	NA	9831.55	9831.55	466239.487	NONE
2	126368481	126370218	esv3592314	NONE	0	0.116162	0.00485437	Introgressed	NO_DUP_NO_DEL	NA	NA	NA	NA	NA	NA	0.733957	-0.832613	3.495587	-0.138159	2710.59	2433.5	165493.02	NONE
2	126378563	126385327	esv3592316	NONE	0.00462963	0.020202	0	Absent	NO_DUP_NO_DEL	NA	NA	NA	NA	4.289163	0.533222	1.437473	1.437473	NA	NA	4257.4	4043.83	203182.8862	NONE
2	126443247	126451831	esv3592317	NONE	0.680556	0.621212	0.830097	Absent	NO_DUP_NO_DEL	NA	NA	NA	NA	0.878025	0.190743	0.90651	-0.110384	2.763772	1.057366	67665.8	52454.4	679287.4	NONE
2	126478985	126482378	esv3592318	NONE	0.00925926	0	0	Absent	NO_DUP_NO_DEL	NA	NA	NA	NA	3.101258	2.374379	NA	NA	NA	NA	5232.73	4748.74	110834.955	NONE
2	126678199	126682039	esv3592324	NONE	0	0.00505051	0.00485437	Absent	NO_DUP_NO_DEL	NA	NA	NA	NA	NA	NA	2.106186	-0.461485	3.756615	-1.185282	3671.43	1635.62	173796.26	NONE
2	127044986	127047147	esv3592336	NONE	0	0	0.00970874	Absent	NO_DUP_NO_DEL	NA	NA	NA	NA	NA	NA	NA	NA	-0.855888	-0.855888	782.548	782.548	5153.4	NONE
2	127674757	127677270	esv3592348	NONE	0.226852	0.863636	0.849515	Absent	NO_DUP_NO_DEL	NA	NA	NA	NA	0.183187	-0.285967	1.708099	0.009104	0.327561	0.246694	32805.8	32805.8	796779.2	NONE
2	127718881	127722339	esv3592349	NONE	0.162037	0.0505051	0.00970874	Absent	NO_DUP_NO_DEL	NA	NA	NA	NA	3.388071	1.147378	10.127602	2.042626	7.208715	2.783348	21345.5	18287.1	2121320.189	NONE
2	128220311	128222543	esv3592362	NONE	0.0277778	0	0	Absent	NO_DUP_NO_DEL	NA	NA	NA	NA	0.706383	0.706383	NA	NA	NA	NA	2393.57	2113.98	326681.0222	NONE
2	128223692	128225830	esv3592363	NONE	0.087963	0	0	Absent	NO_DUP_NO_DEL	NA	NA	NA	NA	0.93403	0.93403	NA	NA	NA	NA	4481.99	4481.99	30974.342	NONE
2	129784536	129787192	esv3592415	NONE	0	0.030303	0	Absent	NO_DUP_NO_DEL	NA	NA	NA	NA	NA	NA	-0.680015	-0.680015	NA	NA	666.607	666.607	31698.24	NONE
2	130196031	130200577	esv3592420	NONE	0	0.010101	0	Absent	NO_DUP_NO_DEL	NA	NA	NA	NA	NA	NA	0.377567	0.377567	NA	NA	558.495	558.495	NA	NONE
2	130437865	130445375	esv3592428	NONE	0.12037	0	0	Absent	NO_DUP_NO_DEL	NA	NA	NA	NA	2.649911	0.805378	NA	NA	NA	NA	4819.94	2080.27	37180.5	NONE
2	130554209	130558782	esv3592433	NONE	0.171296	0	0	Absent	NO_DUP_NO_DEL	NA	NA	NA	NA	0.535136	-0.923953	NA	NA	NA	NA	23976.5	7790.96	1121103.9	NONE
2	131639070	131647330	esv3592461	NONE	0.0185185	0	0	Absent	NO_DUP_NO_DEL	NA	NA	NA	NA	0.444572	0.444572	NA	NA	NA	NA	55622.5	783.025	22326.332	NONE
2	131893726	131894801	esv3592463	NONE	0.0277778	0	0	Absent	NO_DUP_NO_DEL	NA	NA	NA	NA	0.888793	0.550753	NA	NA	NA	NA	2965.33	2913.28	144743.9933	NONE
2	132087249	132096607	esv3592473	NONE	0.0648148	0	0.00485437	Absent	NO_DUP_NO_DEL	NA	NA	NA	NA	NA	NA	NA	NA	NA	NA	7007.14	5731.65	NA	NONE
2	132221719	132223868	esv3592482	NONE	0.611111	0.0454545	0.00485437	Ancient	DUP	NA	NA	NA	NA	NA	NA	NA	NA	NA	NA	65586.9	47147.1	NA	NONE
2	132534284	132534838	esv3592495	NONE	0.5	0.626263	0.694175	Absent	NO_DUP_NO_DEL	NA	NA	NA	NA	NA	NA	NA	NA	NA	NA	68412.5	56834.8	NA	NONE
2	132534497	132534923	esv3592496	NONE	0.5	0.626263	0.694175	Absent	NO_DUP_NO_DEL	NA	NA	NA	NA	NA	NA	NA	NA	NA	NA	68412.5	56834.8	NA	NONE
2	133179986	133180916	esv3592508	NONE	0.0416667	0	0	Absent	NO_DUP_NO_DEL	NA	NA	NA	NA	2.905763	-0.134501	NA	NA	NA	NA	15013.2	15013.2	95622.52467	NONE
2	133246414	133248415	esv3592510	NONE	0.0231481	0	0	Absent	NO_DUP_NO_DEL	NA	NA	NA	NA	1.758753	1.758753	NA	NA	NA	NA	19466.5	19466.5	454598.76	NONE
2	134423453	134426303	esv3592537	NONE	0.0231481	0	0	Absent	NO_DUP_NO_DEL	NA	NA	NA	NA	0.920841	0.920841	NA	NA	NA	NA	1293.09	1008.92	9478.378	NONE
2	135846650	135847045	esv3592571	NONE	0.0138889	0	0	Absent	NO_DUP_NO_DEL	NA	NA	NA	NA	1.581578	-0.74561	NA	NA	NA	NA	35041.7	24555.6	NA	NONE
2	136970889	136972549	esv3592592	NONE	0.00925926	0	0	Absent	NO_DUP_NO_DEL	NA	NA	NA	NA	-0.686918	-0.686918	NA	NA	NA	NA	1365.05	672.135	125389.11	NONE
2	137081932	137083024	esv3592595	NONE	0	0	0.00970874	Absent	NO_DUP_NO_DEL	NA	NA	NA	NA	NA	NA	NA	NA	NA	NA	710.088	710.088	NA	NONE
2	138469144	138469611	esv3592633	NONE	0.143519	0	0	Absent	NO_DUP_NO_DEL	NA	NA	NA	NA	5.999352	1.601927	NA	NA	NA	NA	33500.4	29836.7	3638523.105	NONE
2	138490123	138490496	esv3592634	NONE	0.402778	0.191919	0.116505	Ancient	NO_DUP_NO_DEL	NA	NA	NA	NA	3.769801	2.056604	6.426296	3.777574	6.524062	2.928203	44679.2	30718.6	2283336.14	NONE
2	138611854	138613242	esv3592635	NONE	0.0138889	0	0	Absent	NO_DUP_NO_DEL	NA	NA	NA	NA	0.849967	0.510106	NA	NA	NA	NA	7720.89	7534.24	773344.32	NONE
2	138637457	138639831	esv3592637	NONE	0.00925926	0	0	Absent	NO_DUP_NO_DEL	NA	NA	NA	NA	0.182208	0.182208	NA	NA	NA	NA	943.893	853.248	NA	NONE
2	139975647	139976131	esv3592657	NONE	0.0277778	0	0	Absent	NO_DUP_NO_DEL	NA	NA	NA	NA	2.352935	2.003564	NA	NA	NA	NA	6018.98	5682.3	312413.332	NONE
2	140116889	140117517	esv3592664	NONE	0.0277778	0	0	Absent	NO_DUP_NO_DEL	NA	NA	NA	NA	2.732612	1.538115	NA	NA	NA	NA	17124.6	14314.3	NA	NONE
2	140716324	140718793	esv3592673	NONE	0.087963	0	0	Absent	NO_DUP_NO_DEL	NA	NA	NA	NA	0.546073	0.546073	NA	NA	NA	NA	2586.78	2071.01	108549.1353	NONE
2	143615014	143616012	esv3592742	NONE	0.0787037	0	0	Absent	NO_DUP_NO_DEL	NA	NA	NA	NA	0.45826	-0.909237	NA	NA	NA	NA	14135	12595.4	112004.9933	NONE
2	143667758	143670027	esv3592745	NONE	0.0138889	0	0	Absent	NO_DUP_NO_DEL	NA	NA	NA	NA	5.908473	-0.243019	NA	NA	NA	NA	1208.24	987.401	NA	NONE
2	145480751	145485356	esv3592778	NONE	0.0277778	0	0	Absent	NO_DUP_NO_DEL	NA	NA	NA	NA	1.570846	0.355824	NA	NA	NA	NA	7905.15	6579.17	137164.3	NONE
2	146884867	146889535	esv3592800	NONE	0	0	0.0242718	Absent	NO_DUP_NO_DEL	NA	NA	NA	NA	NA	NA	NA	NA	0.183103	0.183103	938.468	938.468	NA	NONE
2	147941322	147946801	esv3592813	NONE	0.222222	0.0151515	0.199029	Absent	NO_DUP_NO_DEL	NA	NA	NA	NA	0.97096	0.102699	0.689754	-0.951218	1.951777	0.369039	25934.9	24686.6	368973.227	NONE
2	148574379	148575562	esv3592828	NONE	0	0.0151515	0	Absent	NO_DUP_NO_DEL	NA	NA	NA	NA	NA	NA	0.979531	0.979531	NA	NA	1951.48	1910.07	43977.26433	NONE
2	149199590	149203772	esv3592845	NONE	0.101852	0	0	Absent	NO_DUP_NO_DEL	NA	NA	NA	NA	-0.147888	-0.147888	NA	NA	NA	NA	2579.33	2579.33	51409.26	NONE
2	151393999	151394678	esv3592891	NONE	0.0694444	0	0.0291262	Absent	NO_DUP_NO_DEL	NA	NA	NA	NA	2.175628	-0.29557	NA	NA	3.120185	0.502626	24093.8	13257.3	324963.0378	NONE
2	151686646	151687993	esv3592902	NONE	0.166667	0	0	Absent	NO_DUP_NO_DEL	NA	NA	NA	NA	1.878627	1.878627	NA	NA	NA	NA	9526.05	1636.89	552365.7729	NONE
2	154895775	154899188	esv3592976	NONE	0	0.323232	0.116505	Introgressed	NO_DUP_NO_DEL	NA	NA	NA	NA	NA	NA	1.308234	-0.468151	2.855949	-1.189733	17765.6	16460.1	379445.0965	NONE
2	155373522	155374616	esv3592996	NONE	0.00925926	0.0252525	0.160194	Absent	NO_DUP_NO_DEL	NA	NA	NA	NA	0.614618	0.074359	2.553296	0.161718	2.225694	0.53867	15846.4	4210.11	248337.985	NONE
2	156833715	156835494	esv3593035	NONE	0	0.0454545	0	Ancient	NO_DUP_NO_DEL	NA	NA	NA	NA	NA	NA	1.952345	-0.503546	NA	NA	1824.99	1625.81	163858.0421	NONE
2	158119004	158119794	esv3593056	NONE	0.0648148	0	0	Absent	NO_DUP_NO_DEL	NA	NA	NA	NA	0.011366	-0.391164	NA	NA	NA	NA	4103.44	2429.93	608472.396	NONE
2	158985289	158986229	esv3593069	NONE	0.0185185	0	0	Absent	NO_DUP_NO_DEL	NA	NA	NA	NA	3.594377	3.594377	NA	NA	NA	NA	2572.84	2489.51	NA	NONE
2	159661933	159662894	esv3593087	NONE	0.0648148	0.121212	0	Absent	NO_DUP_NO_DEL	NA	NA	NA	NA	0.073511	0.073511	-0.155224	-0.155224	NA	NA	8477.91	8477.91	283767.12	NONE
2	160290708	160291884	esv3593114	NONE	0	0.0505051	0	Absent	NO_DUP_NO_DEL	NA	NA	NA	NA	NA	NA	0.79911	-0.776299	NA	NA	1052.77	1052.77	70374.472	NONE
2	162001727	162002451	esv3593151	NONE	0.0185185	0	0	Absent	NO_DUP_NO_DEL	NA	NA	NA	NA	-0.384882	-0.384882	NA	NA	NA	NA	1304.9	1304.9	10585.568	NONE
2	162332269	162334045	esv3593158	NONE	0.560185	0.848485	0.834951	Absent	NO_DUP_NO_DEL	NA	NA	NA	NA	2.425767	1.308469	3.594393	2.627399	4.61031	2.660282	47403.9	24575.3	448588.4683	NONE
2	163178366	163180421	esv3593180	NONE	0.0416667	0	0	Absent	NO_DUP_NO_DEL	NA	NA	NA	NA	1.043018	-0.303326	NA	NA	NA	NA	1978.99	1978.99	67820.2	NONE
2	164438211	164443792	esv3593203	NONE	0.0185185	0	0	Absent	NO_DUP_NO_DEL	NA	NA	NA	NA	4.033453	2.262382	NA	NA	NA	NA	4910.55	2795.51	158248.832	NONE
2	164641195	164646485	esv3593207	NONE	0.0555556	0.0707071	0.0339806	Absent	NO_DUP_NO_DEL	NA	NA	NA	NA	1.547205	1.547205	-1.809476	-1.809476	-1.309458	-1.309458	27632.7	27632.7	765931.6	NONE
2	166014697	166016751	esv3593232	NONE	0.37037	0.111111	0.572816	Ancient	NO_DUP_NO_DEL	NA	NA	NA	NA	6.120388	1.201068	8.590773	2.150683	5.272724	1.272345	30692.2	28990.6	1975481.55	NONE
2	167545980	167547056	esv3593258	NONE	0.189815	0.671717	0.470874	Absent	NO_DUP_NO_DEL	NA	NA	NA	NA	-0.311733	-0.311733	-0.891795	-0.891795	-0.572018	-0.572018	43360.5	43360.5	NA	NONE
2	169267581	169297868	esv3593310	NONE	0.00925926	0	0	Absent	NO_DUP_NO_DEL	NA	NA	NA	NA	2.446581	2.446581	NA	NA	NA	NA	779.215	779.215	7116.83	NONE
2	169586999	169588199	esv3593317	NONE	0	0	0.0194175	Recurrent	NO_DUP_NO_DEL	NA	NA	NA	NA	NA	NA	NA	NA	-0.380891	-0.380891	771.629	738.079	7691.306	NONE
2	172832488	172841076	esv3593354	NONE	0.0972222	0	0	Absent	NO_DUP_NO_DEL	NA	NA	NA	NA	0.644011	-0.489532	NA	NA	NA	NA	2090.21	1443.56	47899.383	NONE
2	172906293	172910665	esv3593357	NONE	0.0601852	0.373737	0.11165	Absent	NO_DUP_NO_DEL	NA	NA	NA	NA	3.04055	1.084085	3.777385	3.741675	2.310761	2.148149	26797.8	2745.07	240808.04	NONE
2	173004248	173007476	esv3593358	NONE	0.314815	0.272727	0.218447	Absent	NO_DUP_NO_DEL	NA	NA	NA	NA	1.422312	1.084081	0.785262	0.123749	1.187287	0.441432	61676.7	55368.7	1227536.24	NONE
2	173391384	173392558	esv3593367	NONE	0.0185185	0	0	Absent	NO_DUP_NO_DEL	NA	NA	NA	NA	1.290671	0.426526	NA	NA	NA	NA	37136.4	2866.83	320465.74	NONE
2	173554461	173556241	esv3593372	NONE	0	0.0555556	0.223301	Introgressed	NO_DUP_NO_DEL	NA	NA	NA	NA	NA	NA	3.688775	1.632675	1.274222	0.385256	7918.96	2482.41	364573.8815	NONE
2	174540659	174549349	esv3593388	NONE	0.00925926	0	0	Absent	NO_DUP_NO_DEL	NA	NA	NA	NA	1.498239	1.029056	NA	NA	NA	NA	3845.24	3845.24	NA	NONE
2	174719239	174722104	esv3593390	NONE	0.00925926	0	0	Absent	NO_DUP_NO_DEL	NA	NA	NA	NA	2.608755	2.608755	NA	NA	NA	NA	3985.53	118.409	NA	NONE
2	175169143	175171478	esv3593405	NONE	0.0277778	0	0	Absent	NO_DUP_NO_DEL	NA	NA	NA	NA	1.401262	1.401262	NA	NA	NA	NA	1173.78	1173.78	30936.626	NONE
2	175507333	175508397	esv3593411	NONE	0.24537	0	0	Ancient	NO_DUP_NO_DEL	NA	NA	NA	NA	-0.086288	-0.086288	NA	NA	NA	NA	40223.2	39798.5	743941.8	NONE
2	175910715	175911105	esv3593417	NONE	0.0138889	0.00505051	0.00970874	Absent	NO_DUP_NO_DEL	NA	NA	NA	NA	1.364638	-0.459081	2.01405	-1.166306	3.053553	-1.564553	1370.62	1305.51	387394.112	NONE
2	176101349	176105063	esv3593418	NONE	0	0	0.00970874	Absent	NO_DUP_NO_DEL	NA	NA	NA	NA	NA	NA	NA	NA	2.813087	-0.682969	27180	913.904	180384.1918	NONE
2	177591365	177591810	esv3593452	NONE	0	0.0151515	0	Introgressed	NO_DUP_NO_DEL	NA	NA	NA	NA	NA	NA	1.474163	0.149064	NA	NA	38950.6	3439.37	251045.5868	NONE
2	177799375	177802749	esv3593454	NONE	0.0277778	0	0	Absent	NO_DUP_NO_DEL	NA	NA	NA	NA	1.097252	1.097252	NA	NA	NA	NA	1332.27	1170.79	NA	NONE
2	178740972	178742103	esv3593478	NONE	0.171296	0.0757576	0.0242718	Absent	NO_DUP_NO_DEL	NA	NA	NA	NA	2.68585	-0.034804	2.782406	-0.358827	3.953628	0.058479	57738.1	50093.1	445669.952	NONE
2	178838511	178847938	esv3593480	NONE	0	0.0757576	0.0242718	Absent	NO_DUP_NO_DEL	NA	NA	NA	NA	NA	NA	5.400216	0.794853	6.08279	0.906706	3181.07	2033.92	1219435.484	NONE
2	179117115	179117879	esv3593487	NONE	0.00925926	0	0	Absent	NO_DUP_NO_DEL	NA	NA	NA	NA	1.975452	-0.546479	NA	NA	NA	NA	7126.02	1200.66	451491.054	NONE
2	180065283	180082019	esv3593502	NONE	0.421296	0.181818	0.101942	Absent	NO_DUP_NO_DEL	NA	NA	NA	NA	1.308087	-0.47139	2.162239	0.688034	2.751648	1.214225	48753.6	45857.1	958017.6025	NONE
2	180226925	180227456	esv3593503	NONE	0.0694444	0.00505051	0	Absent	NO_DUP_NO_DEL	NA	NA	NA	NA	2.249648	-0.364878	1.450026	-0.761357	NA	NA	23234.7	17395.3	222515.5625	NONE
2	180411408	180422236	esv3593510	NONE	0.143519	0.0555556	0	Absent	NO_DUP_NO_DEL	NA	NA	NA	NA	1.229937	-0.305752	1.265521	-0.151559	NA	NA	44778.3	27596	339944.18	NONE
2	182443196	182445142	esv3593543	NONE	0.0138889	0	0	Absent	NO_DUP_NO_DEL	NA	NA	NA	NA	1.722188	-0.978284	NA	NA	NA	NA	24131.9	5495.37	254186.2842	NONE
2	182856891	182857589	esv3593555	NONE	0.25463	0.313131	0.169903	Absent	NO_DUP_NO_DEL	NA	NA	NA	NA	1.01622	-0.608679	1.617967	-0.876547	2.218765	-1.871547	4351.27	3106.57	395901.2867	NONE
2	183090392	183091625	esv3593563	NONE	0.208333	0	0	Absent	NO_DUP_NO_DEL	NA	NA	NA	NA	4.216594	0.244918	NA	NA	NA	NA	25962.2	3032.9	323124.62	NONE
2	183989628	183990196	esv3593583	NONE	0.037037	0	0	Absent	NO_DUP_NO_DEL	NA	NA	NA	NA	0.856267	-0.216229	NA	NA	NA	NA	2577.33	2577.33	31965.71467	NONE
2	184085515	184090985	esv3593584	NONE	0	0.0656566	0	Absent	NO_DUP_NO_DEL	NA	NA	NA	NA	NA	NA	0.669655	0.224683	NA	NA	1481.75	1409.99	101194.779	NONE
2	184601722	184604741	esv3593595	NONE	0.0648148	0	0	Absent	NO_DUP_NO_DEL	NA	NA	NA	NA	1.961155	0.541504	NA	NA	NA	NA	35386.2	6184.52	631108.7274	NONE
2	184686695	184699262	esv3593598	NONE	0	0.010101	0	Absent	NO_DUP_NO_DEL	NA	NA	NA	NA	NA	NA	-1.444764	-1.444764	NA	NA	433.941	433.941	13934.8888	NONE
2	184794427	184804039	esv3593600	NONE	0	0.010101	0	Absent	NO_DUP_NO_DEL	NA	NA	NA	NA	NA	NA	-1.049689	-1.049689	NA	NA	1127.33	1127.33	157521.42	NONE
2	184848755	184850436	esv3593602	NONE	0.0138889	0	0	Absent	NO_DUP_NO_DEL	NA	NA	NA	NA	1.536277	-0.518916	NA	NA	NA	NA	1799.98	1799.98	NA	NONE
2	185099104	185136330	esv3593610	NONE	0.0138889	0	0	Absent	NO_DUP_NO_DEL	NA	NA	NA	NA	1.769059	-0.898849	NA	NA	NA	NA	2416.43	1366.3	90373.052	NONE
2	185117288	185121984	esv3593611	NONE	0.0138889	0	0	Absent	NO_DUP_NO_DEL	NA	NA	NA	NA	1.769059	-0.898849	NA	NA	NA	NA	2416.37	1366.3	100893.065	NONE
2	185246734	185264716	esv3593617	NONE	0.115741	0	0	Absent	NO_DUP_NO_DEL	NA	NA	NA	NA	2.184763	0.150646	NA	NA	NA	NA	7734.38	6764.24	573232.31	NONE
2	186740850	186748926	esv3593655	NONE	0.0185185	0.00505051	0	Absent	NO_DUP_NO_DEL	NA	NA	NA	NA	1.479226	-0.741393	0.062819	-1.110662	NA	NA	2686.14	2686.14	167282.22	NONE
2	187656556	187658040	esv3593677	NONE	0.0972222	0	0	Absent	NO_DUP_NO_DEL	NA	NA	NA	NA	0.953343	0.4047	NA	NA	NA	NA	18510.5	6876.52	214580.8127	NONE
2	187674589	187676519	esv3593679	NONE	0.0277778	0	0	Absent	NO_DUP_NO_DEL	NA	NA	NA	NA	1.668787	1.668787	NA	NA	NA	NA	3167.34	2499.81	117300.322	NONE
2	188096287	188097072	esv3593687	NONE	0.00925926	0	0	Absent	NO_DUP_NO_DEL	NA	NA	NA	NA	-0.171601	-0.21411	NA	NA	NA	NA	2150.2	1748.21	NA	NONE
2	188096547	188105763	esv3593688	NONE	0.00925926	0	0	Absent	NO_DUP_NO_DEL	NA	NA	NA	NA	-0.171601	-0.21411	NA	NA	NA	NA	2150.2	1748.21	NA	NONE
2	188384243	188389799	esv3593692	NONE	0.0138889	0	0	Absent	NO_DUP_NO_DEL	NA	NA	NA	NA	0.083588	0.083588	NA	NA	NA	NA	1001.09	1001.09	NA	NONE
2	189119663	189120979	esv3593712	NONE	0.393519	0.181818	0.281553	Ancient	NO_DUP_NO_DEL	NA	NA	NA	NA	1.737254	0.148459	2.39397	0.183785	3.185615	0.67196	75930.4	45276.2	1292144.108	NONE
2	193554625	193559157	esv3593790	NONE	0	0	0.0145631	Absent	NO_DUP_NO_DEL	NA	NA	NA	NA	NA	NA	NA	NA	-3.293147	-3.529952	1029.48	1029.48	28699.888	NONE
2	194810988	194813535	esv3593819	NONE	0.0185185	0	0.00485437	Absent	NO_DUP_NO_DEL	NA	NA	NA	NA	0.441954	0.372438	NA	NA	2.123148	1.414278	2471.22	2205.42	191323.88	NONE
2	195021173	195021716	esv3593828	NONE	0.00925926	0	0	Absent	NO_DUP_NO_DEL	NA	NA	NA	NA	8.092974	0.386134	NA	NA	NA	NA	25113.7	21170.6	934923.8996	NONE
2	195297143	195298453	esv3593832	NONE	0.106481	0.0606061	0.0242718	Ancient	NO_DUP_NO_DEL	NA	NA	NA	NA	1.395151	1.043729	1.922963	0.279394	3.91847	0.253859	12679.1	1583.44	1638577.263	NONE
2	195312477	195326422	esv3593833	NONE	0.0185185	0	0	Absent	NO_DUP_NO_DEL	NA	NA	NA	NA	1.394107	1.165523	NA	NA	NA	NA	32845.8	1991.31	NA	NONE
2	195689083	195691692	esv3593847	NONE	0.00925926	0	0	Absent	NO_DUP_NO_DEL	NA	NA	NA	NA	3.536947	2.251123	NA	NA	NA	NA	3892.09	2388.2	32774.042	NONE
2	195979320	195984295	esv3593856	NONE	0.282407	0.0454545	0.121359	Ancient	NO_DUP_NO_DEL	NA	NA	NA	NA	1.883359	-0.820913	1.861206	-0.036525	1.368177	0.484563	39011.1	32909.6	1394712.06	NONE
2	196162906	196164329	esv3593862	NONE	0.0601852	0	0	Absent	NO_DUP_NO_DEL	NA	NA	NA	NA	-0.362686	-0.362686	NA	NA	NA	NA	5141.31	5141.31	15967.84	NONE
2	196172288	196174028	esv3593863	NONE	0.00462963	0.0151515	0	Absent	NO_DUP_NO_DEL	NA	NA	NA	NA	2.708625	0.785414	3.156478	3.156478	NA	NA	2589.36	2589.36	419923.238	NONE
2	196214818	196215228	esv3593865	NONE	0.671296	0.939394	0.558252	Ancient	NO_DUP_NO_DEL	NA	NA	NA	NA	0.179723	-0.072335	3.771615	2.079625	0.725179	0.526113	50365.9	44689.1	496902	NONE
2	198141598	198143236	esv3593904	NONE	0.0231481	0	0	Absent	NO_DUP_NO_DEL	NA	NA	NA	NA	1.321951	1.321951	NA	NA	NA	NA	629.563	629.563	NA	NONE
2	200312454	200312679	esv3593946	NONE	0.152778	0.636364	0.378641	Absent	NO_DUP_NO_DEL	NA	NA	NA	NA	0.783194	0.783194	2.822519	2.822519	2.250736	2.250736	29203.5	28327.5	624836.3333	NONE
2	202373659	202375063	esv3593980	NONE	0.115741	0	0	Absent	NO_DUP_NO_DEL	NA	NA	NA	NA	0.434818	0.434818	NA	NA	NA	NA	47985.5	3337.21	481486.2967	NONE
2	203304840	203308781	esv3593997	NONE	0.236111	0	0	Absent	NO_DUP_NO_DEL	NA	NA	NA	NA	0.229033	-0.347258	NA	NA	NA	NA	9196.08	7777.8	198737.3197	NONE
2	203344118	203344921	esv3593998	NONE	0.00925926	0	0	Absent	NO_DUP_NO_DEL	NA	NA	NA	NA	1.933243	1.121029	NA	NA	NA	NA	4091.29	4002.25	NA	NONE
2	204127828	204129577	esv3594010	NONE	0.00925926	0	0	Absent	NO_DUP_NO_DEL	NA	NA	NA	NA	0.129684	-0.27034	NA	NA	NA	NA	1051.98	1042.23	23999.08	NONE
2	204181530	204191631	esv3594013	NONE	0	0.0151515	0	Absent	NO_DUP_NO_DEL	NA	NA	NA	NA	NA	NA	-0.63578	-0.63578	NA	NA	1095.15	1057.45	5054.966	NONE
2	204515168	204517745	esv3594017	NONE	0.00925926	0	0	Absent	NO_DUP_NO_DEL	NA	NA	NA	NA	1.665847	1.665847	NA	NA	NA	NA	1316.59	1316.59	NA	NONE
2	205343854	205349162	esv3594031	NONE	0.0138889	0	0	Absent	NO_DUP_NO_DEL	NA	NA	NA	NA	0.999139	-0.682571	NA	NA	NA	NA	7620.76	1203.06	1087872.8	NONE
2	205706110	205712057	esv3594042	NONE	0.00925926	0	0	Absent	NO_DUP_NO_DEL	NA	NA	NA	NA	-0.222777	-0.222777	NA	NA	NA	NA	1899.14	850.321	87582.18	NONE
2	205999231	205999657	esv3594048	NONE	0.00462963	0	0.0339806	Absent	NO_DUP_NO_DEL	NA	NA	NA	NA	-0.214838	-0.214838	NA	NA	-0.577531	-0.577531	7158.48	7158.48	NA	NONE
2	206128030	206129895	esv3594052	NONE	0.0231481	0.040404	0.0339806	Absent	NO_DUP_NO_DEL	NA	NA	NA	NA	1.183457	1.086742	0.810952	0.810952	0.589059	-0.396523	2406.94	2033.13	323951.355	NONE
2	208144301	208147087	esv3594082	NONE	0.0555556	0	0	Absent	NO_DUP_NO_DEL	NA	NA	NA	NA	1.158445	1.158445	NA	NA	NA	NA	1577.74	1577.74	28847.56	NONE
2	208351101	208359313	esv3594087	NONE	0.00925926	0.181818	0	Absent	NO_DUP_NO_DEL	NA	NA	NA	NA	0.906303	-0.441718	1.246301	-0.820343	NA	NA	5181.94	2287.72	442241.6727	NONE
2	209942971	209948927	esv3594137	NONE	0.263889	0.318182	0.038835	Absent	DEL_OR_PARTIAL_DEL	NA	NA	NA	NA	1.707655	0.778694	2.360613	1.237294	2.147858	1.135844	20843.4	20843.4	963847.3843	NONE
2	210405218	210406361	esv3594150	NONE	0.12963	0	0	Ancient	NO_DUP_NO_DEL	NA	NA	NA	NA	2.996224	0.685636	NA	NA	NA	NA	41483.2	23640	1451588.995	NONE
2	211768315	211779821	esv3594161	NONE	0.0138889	0	0	Absent	NO_DUP_NO_DEL	NA	NA	NA	NA	4.160997	4.160997	NA	NA	NA	NA	1522.88	1522.88	NA	NONE
2	212078738	212080509	esv3594167	NONE	0.037037	0	0	Absent	NO_DUP_NO_DEL	NA	NA	NA	NA	5.974543	0.564567	NA	NA	NA	NA	4860.59	3705.06	344383.157	NONE
2	213183956	213192007	esv3594201	NONE	0	0.0656566	0	Absent	NO_DUP_NO_DEL	NA	NA	NA	NA	NA	NA	1.133374	1.133374	NA	NA	702.61	702.61	30567.306	NONE
2	213620975	213624780	esv3594218	NONE	0.115741	0	0	Absent	DEL_OR_PARTIAL_DEL	NA	NA	NA	NA	1.437649	1.066888	NA	NA	NA	NA	74216	4782.82	558036.4835	NONE
2	214349758	214354592	esv3594238	NONE	0.00925926	0	0	Absent	NO_DUP_NO_DEL	NA	NA	NA	NA	4.848666	2.171325	NA	NA	NA	NA	7843.17	6747.95	122645.7002	NONE
2	214874705	214876211	esv3594251	NONE	0.314815	0.0858586	0.106796	Absent	NO_DUP_NO_DEL	NA	NA	NA	NA	0.798155	0.798155	0.483239	-0.627694	-0.069194	-1.20837	21093.3	21093.3	597060.765	NONE
2	215728762	215730832	esv3594270	NONE	0.162037	0.358586	0.359223	Absent	NO_DUP_NO_DEL	NA	NA	NA	NA	0.830531	0.830531	-0.225383	-0.225383	-0.168362	-0.551442	3973.73	3112.69	293917.344	NONE
2	216920212	216923457	esv3594289	NONE	0.00925926	0	0	Absent	NO_DUP_NO_DEL	NA	NA	NA	NA	-0.497087	-0.497087	NA	NA	NA	NA	1330.61	1330.61	NA	NONE
2	219521362	219523384	esv3594347	NONE	0	0	0.00970874	Absent	NO_DUP_NO_DEL	NA	NA	NA	NA	NA	NA	NA	NA	NA	NA	281.631	281.631	NA	NONE
2	221394018	221396755	esv3594382	NONE	0.0416667	0	0	Absent	NO_DUP_NO_DEL	NA	NA	NA	NA	0.927576	-0.271361	NA	NA	NA	NA	59278.5	19488.1	370053.24	NONE
2	222678551	222681033	esv3594412	NONE	0.0231481	0	0	Absent	NO_DUP_NO_DEL	NA	NA	NA	NA	2.906467	-0.407087	NA	NA	NA	NA	3412.87	1902.46	25621.89	NONE
2	223865068	223869900	esv3594435	NONE	0.125	0.0606061	0.0145631	Absent	NO_DUP_NO_DEL	NA	NA	NA	NA	0.612052	0.612052	3.44065	3.059445	8.37683	7.204491	23169.1	20947.6	673903.216	NONE
2	224682195	224682711	esv3594454	NONE	0.037037	0	0	Absent	NO_DUP_NO_DEL	NA	NA	NA	NA	0.799029	0.355648	NA	NA	NA	NA	23171.1	23171.1	452334.9367	NONE
2	225161407	225166836	esv3594463	NONE	0.12963	0	0	Absent	NO_DUP_NO_DEL	NA	NA	NA	NA	0.358322	0.358322	NA	NA	NA	NA	8697.82	8697.82	44313.92	NONE
2	225219878	225220569	esv3594466	NONE	0.111111	0	0	Absent	NO_DUP_NO_DEL	NA	NA	NA	NA	1.108017	0.256303	NA	NA	NA	NA	3999.58	3785.6	176562.3129	NONE
2	227447554	227448007	esv3594514	NONE	0.0185185	0	0	Absent	NO_DUP_NO_DEL	NA	NA	NA	NA	0.599968	-0.609275	NA	NA	NA	NA	5108.64	2963.28	100481.9713	NONE
2	227515286	227515820	esv3594516	NONE	0.0277778	0	0	Absent	NO_DUP_NO_DEL	NA	NA	NA	NA	0.539249	-0.827148	NA	NA	NA	NA	11233.5	4723.15	NA	NONE
2	228268940	228270088	esv3594538	NONE	0.0509259	0	0	Absent	NO_DUP_NO_DEL	NA	NA	NA	NA	1.433356	0.584628	NA	NA	NA	NA	4954.84	4954.84	27842.122	NONE
2	229148265	229149281	esv3594550	NONE	0.0138889	0	0	Absent	NO_DUP_NO_DEL	NA	NA	NA	NA	0.569205	0.569205	NA	NA	NA	NA	2154.26	2154.26	84682.08	NONE
2	229264315	229268329	esv3594552	NONE	0.087963	0.323232	0.140777	Absent	NO_DUP_NO_DEL	NA	NA	NA	NA	2.255834	0.788332	1.734589	-0.382588	5.173072	1.110506	3668.38	2519.98	755760.4235	NONE
2	229449512	229452066	esv3594560	NONE	0.231481	0.00505051	0	Absent	NO_DUP_NO_DEL	NA	NA	NA	NA	2.57153	0.083581	7.73236	-0.495968	NA	NA	33585	12567.2	1007807.192	NONE
2	231705918	231706902	esv3594614	NONE	0.0462963	0	0	Absent	NO_DUP_NO_DEL	NA	NA	NA	NA	-0.314381	-0.314381	NA	NA	NA	NA	4108.11	4108.11	27530.16	NONE
2	232844067	232847808	esv3594637	NONE	0.00925926	0	0	Absent	NO_DUP_NO_DEL	NA	NA	NA	NA	0.202162	-0.416167	NA	NA	NA	NA	793.687	469.281	NA	NONE
2	233332725	233333474	esv3594654	NONE	0.208333	0.277778	0.0194175	Absent	NO_DUP_NO_DEL	NA	NA	NA	NA	NA	NA	NA	NA	NA	NA	22888.3	16501.2	NA	NONE
2	233827006	233828287	esv3594666	NONE	0.0277778	0	0	Absent	NO_DUP_NO_DEL	NA	NA	NA	NA	4.353663	-0.257748	NA	NA	NA	NA	26084.8	20923.8	293779.096	NONE
2	234942614	234955966	esv3594684	NONE	0.0138889	0	0	Absent	NO_DUP_NO_DEL	NA	NA	NA	NA	2.640516	0.756664	NA	NA	NA	NA	3846.31	1145.09	365656.7628	NONE
2	234991834	234994975	esv3594687	NONE	0.0277778	0	0	Absent	NO_DUP_NO_DEL	NA	NA	NA	NA	2.23756	1.162799	NA	NA	NA	NA	21175.9	7176.75	184777.376	NONE
2	235259876	235261495	esv3594689	NONE	0.0555556	0	0	Absent	NO_DUP_NO_DEL	NA	NA	NA	NA	1.656103	1.656103	NA	NA	NA	NA	2286.39	2199.07	12365.696	NONE
2	235714294	235716218	esv3594699	NONE	0.0462963	0	0	Absent	NO_DUP_NO_DEL	NA	NA	NA	NA	0.58682	0.58682	NA	NA	NA	NA	27529.5	14628.8	72475.88133	NONE
2	235840973	235843313	esv3594703	NONE	0.0185185	0	0	Absent	NO_DUP_NO_DEL	NA	NA	NA	NA	2.040053	-0.158709	NA	NA	NA	NA	3876.27	3819.22	239955.66	NONE
2	237333267	237335187	esv3594724	NONE	0.0185185	0	0	Absent	NO_DUP_NO_DEL	NA	NA	NA	NA	4.02467	0.886519	NA	NA	NA	NA	30048.3	7500.9	887409.3049	NONE
2	237355509	237356224	esv3594725	NONE	0.0601852	0	0	Absent	NO_DUP_NO_DEL	NA	NA	NA	NA	2.336982	0.338344	NA	NA	NA	NA	18818.2	15965	295358.0583	NONE
2	239482925	239484867	esv3594767	NONE	0.0138889	0	0	Absent	NO_DUP_NO_DEL	NA	NA	NA	NA	0.205595	0.061514	NA	NA	NA	NA	9516.81	3936.24	NA	NONE
2	239500362	239501719	esv3594768	NONE	0.361111	0.126263	0.237864	Absent	NO_DUP_NO_DEL	NA	NA	NA	NA	1.357932	0.14112	1.495881	0.638933	1.757407	0.0051	18131.2	14485.9	649923.6022	NONE
2	241477966	241478652	esv3594803	NONE	0.00925926	0	0	Absent	NO_DUP_NO_DEL	NA	NA	NA	NA	-0.259893	-0.259893	NA	NA	NA	NA	743.911	743.911	37282.49	NONE
2	242506075	242507330	esv3594836	NONE	0.407407	0.262626	0.451456	Absent	DUP	NA	NA	NA	NA	-2.587952	-2.587952	-3.562445	-3.562445	-3.390867	-3.390867	42315.8	42315.8	560998.2	NONE
3	330022	330855	esv3594896	NONE	0.00925926	0	0	Absent	NO_DUP_NO_DEL	NA	NA	NA	NA	2.338005	-0.456985	NA	NA	NA	NA	6074.28	4720.79	302703.3209	NONE
3	853770	860977	esv3594930	NONE	0	0.010101	0	Absent	DEL_OR_PARTIAL_DEL	NA	NA	NA	NA	NA	NA	NA	NA	NA	NA	686.423	686.423	NA	NONE
3	990646	996756	esv3594937	NONE	0.00925926	0	0	Absent	NO_DUP_NO_DEL	NA	NA	NA	NA	1.040747	-0.716207	NA	NA	NA	NA	6300.08	1687.89	312250.953	NONE
3	1032830	1039519	esv3594939	NONE	0.0416667	0	0	Absent	NO_DUP_NO_DEL	NA	NA	NA	NA	0.204729	-0.759579	NA	NA	NA	NA	5535.57	1786.56	51889.992	NONE
3	1044150	1046219	esv3594940	NONE	0.0416667	0	0	Absent	NO_DUP_NO_DEL	NA	NA	NA	NA	0.204729	-0.759579	NA	NA	NA	NA	5535.57	1786.56	51889.992	NONE
3	1782264	1788485	esv3594974	NONE	0	0.0252525	0	Absent	NO_DUP_NO_DEL	NA	NA	NA	NA	NA	NA	0.191155	0.191155	NA	NA	796.905	793.555	54560.408	NONE
3	1917803	1923217	esv3594986	NONE	0.12037	0.00505051	0	Absent	NO_DUP_NO_DEL	NA	NA	NA	NA	0.689416	0.689416	NA	NA	NA	NA	13993.1	13993.1	1889693.4	NONE
3	1987331	1988125	esv3595000	NONE	0	0	0.0242718	Absent	NO_DUP_NO_DEL	NA	NA	NA	NA	NA	NA	NA	NA	1.544084	1.544084	1500.72	968.43	40977.741	NONE
3	2028330	2029193	esv3595006	NONE	0.138889	0.00505051	0	Recurrent	DUP	NA	NA	NA	NA	1.645014	1.645014	1.182513	1.182513	NA	NA	33054	29259.4	1094708.44	NONE
3	2320438	2320885	esv3595023	NONE	0.0416667	0	0	Absent	NO_DUP_NO_DEL	NA	NA	NA	NA	5.971113	0.821692	NA	NA	NA	NA	54485.8	6037.53	2415334.412	NONE
3	3014475	3015547	esv3595045	NONE	0.0231481	0.00505051	0	Absent	NO_DUP_NO_DEL	NA	NA	NA	NA	2.173629	1.017739	2.423291	1.756231	NA	NA	27768.6	7819.73	299502.98	NONE
3	3173187	3177075	esv3595052	NONE	0	0	0.0194175	Absent	NO_DUP_NO_DEL	NA	NA	NA	NA	NA	NA	NA	NA	4.653672	-0.980821	12781.4	5278.03	286886.3403	NONE
3	3481036	3483353	esv3595060	NONE	0.0416667	0.010101	0.373786	Ancient	NO_DUP_NO_DEL	NA	NA	NA	NA	1.471428	0.532074	0.893596	0.531689	1.816867	0.097472	24330.6	23274	922012.875	NONE
3	5535382	5539274	esv3595134	NONE	0	0.116162	0.262136	Absent	NO_DUP_NO_DEL	NA	NA	NA	NA	NA	NA	5.423891	5.423891	3.682607	3.682607	15998.7	15998.7	374990.84	NONE
3	5670320	5671038	esv3595139	NONE	0.0231481	0	0	Absent	NO_DUP_NO_DEL	NA	NA	NA	NA	4.725276	0.823124	NA	NA	NA	NA	18725.1	13592.9	2302982.521	NONE
3	5945602	5949124	esv3595148	NONE	0.0185185	0	0	Absent	NO_DUP_NO_DEL	NA	NA	NA	NA	1.802242	0.13307	NA	NA	NA	NA	25868.9	3395.61	325977.6623	NONE
3	6218943	6240293	esv3595153	NONE	0.0185185	0	0	Absent	NO_DUP_NO_DEL	NA	NA	NA	NA	1.739212	1.14776	NA	NA	NA	NA	20978.4	7608.1	13049.99267	NONE
3	6650202	6654630	esv3595165	NONE	0	0.166667	0.00485437	Introgressed	NO_DUP_NO_DEL	NA	NA	NA	NA	NA	NA	2.944287	-1.227126	2.683255	-1.465585	23400.8	5144.87	402207.4	NONE
3	6700872	6701254	esv3595168	NONE	0.0925926	0.363636	0.34466	Absent	NO_DUP_NO_DEL	NA	NA	NA	NA	0.483304	0.178407	2.262851	-0.108079	4.047922	2.676732	39522.6	27188.3	490404.6	NONE
3	7399980	7402162	esv3595190	NONE	0.203704	0.0656566	0	Recurrent	NO_DUP_NO_DEL	NA	NA	NA	NA	0.959719	0.959719	-0.67332	-0.67332	NA	NA	29812.8	29812.8	690677.4	NONE
3	7400637	7402125	esv3595191	NONE	0.208333	0.0656566	0	Ancient	NO_DUP_NO_DEL	NA	NA	NA	NA	1.160088	0.959719	-0.67332	-0.67332	NA	NA	29812.8	29812.8	494960.1533	NONE
3	8325606	8326807	esv3595214	NONE	0.0138889	0.242424	0.242718	Absent	NO_DUP_NO_DEL	NA	NA	NA	NA	-0.223619	-0.569047	0.58137	-0.315374	0.047431	-0.672157	18766.2	17675.7	228252.57	NONE
3	9560878	9563343	esv3595238	NONE	0.0138889	0	0	Absent	NO_DUP_NO_DEL	NA	NA	NA	NA	1.004928	0.073542	NA	NA	NA	NA	15006.5	15006.5	238831.18	NONE
3	9639252	9643836	esv3595245	NONE	0.0185185	0	0	Absent	NO_DUP_NO_DEL	NA	NA	NA	NA	1.05572	-0.295988	NA	NA	NA	NA	37194.1	2178.15	197833.888	NONE
3	9895331	9896785	esv3595251	NONE	0.148148	0	0	Absent	NO_DUP_NO_DEL	NA	NA	NA	NA	1.8304	1.8304	NA	NA	NA	NA	28812.8	23178.1	315854.7	NONE
3	10021836	10023862	esv3595256	NONE	0.0185185	0	0	Absent	NO_DUP_NO_DEL	NA	NA	NA	NA	-0.456564	-0.456564	NA	NA	NA	NA	527.46	527.46	NA	NONE
3	10060220	10060819	esv3595258	NONE	0.0185185	0	0.00970874	Ancient	NO_DUP_NO_DEL	NA	NA	NA	NA	2.744952	2.065617	NA	NA	5.310215	3.127802	43842.6	41952.6	NA	NONE
3	10226169	10228944	esv3595267	NONE	0.0925926	0	0	Absent	NO_DUP_NO_DEL	NA	NA	NA	NA	1.090894	0.164394	NA	NA	NA	NA	25170.9	1798.63	72739.919	NONE
3	10991769	10992269	esv3595285	NONE	0	0	0.121359	Absent	NO_DUP_NO_DEL	NA	NA	NA	NA	NA	NA	NA	NA	2.041794	-1.158948	2224.45	1889.69	155821.89	NONE
3	11108255	11111870	esv3595286	NONE	0.152778	0.0505051	0.31068	Absent	NO_DUP_NO_DEL	NA	NA	NA	NA	-0.525439	-0.756012	-1.199468	-1.405929	-0.394646	-1.188662	12816.2	12496	196097.58	NONE
3	11410108	11414728	esv3595291	NONE	0.0324074	0.020202	0	Absent	NO_DUP_NO_DEL	NA	NA	NA	NA	1.164758	1.164758	0.310397	-1.353468	NA	NA	15355.3	6809.19	121964.9932	NONE
3	11699680	11700120	esv3595301	NONE	0.0138889	0	0	Absent	NO_DUP_NO_DEL	NA	NA	NA	NA	3.630366	0.187457	NA	NA	NA	NA	42035.2	4011.24	67550.88667	NONE
3	11782241	11784276	esv3595306	NONE	0.180556	0	0.00485437	Absent	NO_DUP_NO_DEL	NA	NA	NA	NA	0.496538	0.153592	NA	NA	0.966251	-0.513497	18804.7	18804.7	1310414	NONE
3	11975472	11976122	esv3595313	NONE	0.00925926	0	0	Absent	NO_DUP_NO_DEL	NA	NA	NA	NA	3.556784	1.864457	NA	NA	NA	NA	35831.2	8391.19	223243.2261	NONE
3	12259083	12261321	esv3595319	NONE	0.037037	0	0	Absent	NO_DUP_NO_DEL	NA	NA	NA	NA	6.180858	0.881397	NA	NA	NA	NA	30893.6	3790.96	1458926.169	NONE
3	12365546	12366528	esv3595320	NONE	0.0185185	0	0	Absent	NO_DUP_NO_DEL	NA	NA	NA	NA	1.31517	0.570161	NA	NA	NA	NA	6204.27	5966.67	163575.3	NONE
3	12771189	12771871	esv3595335	NONE	0.0601852	0	0	Absent	NO_DUP_NO_DEL	NA	NA	NA	NA	1.951668	1.951668	NA	NA	NA	NA	8600.74	6798.63	240390.8716	NONE
3	13141433	13142591	esv3595346	NONE	0.125	0.0909091	0	Absent	NO_DUP_NO_DEL	NA	NA	NA	NA	0.881495	0.778946	1.410797	0.754846	NA	NA	30781.7	24903	1443990.45	NONE
3	13681157	13682269	esv3595352	NONE	0	0.242424	0.0194175	Absent	NO_DUP_NO_DEL	NA	NA	NA	NA	NA	NA	2.540464	-0.556139	3.316048	-0.8657	5745.16	4569.03	301573.51	NONE
3	14028240	14033105	esv3595358	NONE	0.0138889	0	0	Absent	NO_DUP_NO_DEL	NA	NA	NA	NA	4.635547	1.080543	NA	NA	NA	NA	21275.9	4374.25	222151.9951	NONE
3	14291146	14296095	esv3595366	NONE	0.0277778	0	0	Absent	NO_DUP_NO_DEL	NA	NA	NA	NA	0.035245	0.035245	NA	NA	NA	NA	742.345	742.345	NA	NONE
3	15012729	15013435	esv3595378	NONE	0.0648148	0	0	Absent	NO_DUP_NO_DEL	NA	NA	NA	NA	2.890444	0.169697	NA	NA	NA	NA	23000.2	19884.1	1214683.188	NONE
3	15164944	15166075	esv3595379	NONE	0	0	0.00970874	Absent	NO_DUP_NO_DEL	NA	NA	NA	NA	NA	NA	NA	NA	0.479211	0.479211	466.131	466.131	NA	NONE
3	16239410	16241213	esv3595400	NONE	0.263889	0.212121	0.228155	Absent	NO_DUP_NO_DEL	NA	NA	NA	NA	0.827185	0.827185	0.203978	0.203978	0.215994	0.215994	41695.3	41695.3	297215.66	NONE
3	17540906	17545575	esv3595420	NONE	0.180556	0.0151515	0.0339806	Absent	NO_DUP_NO_DEL	NA	NA	NA	NA	1.852895	-1.469084	6.030156	-3.00838	5.282116	-1.68376	36283.9	15094.5	364127.5925	NONE
3	17720059	17725038	esv3595425	NONE	0.087963	0	0	Absent	NO_DUP_NO_DEL	NA	NA	NA	NA	1.520134	-0.587426	NA	NA	NA	NA	7583.47	7134.51	184230.7308	NONE
3	18729954	18730777	esv3595438	NONE	0.0509259	0.0959596	0.116505	Absent	NO_DUP_NO_DEL	NA	NA	NA	NA	2.700072	0.148661	2.583643	0.912367	3.799847	-0.053452	27371.3	6016.15	349521.6126	NONE
3	20311445	20317721	esv3595474	NONE	0.0185185	0.20202	0.0873786	Absent	NO_DUP_NO_DEL	NA	NA	NA	NA	0.562813	0.04212	0.82462	0.82462	0.496515	0.246753	3595.61	3595.61	184869.86	NONE
3	20413477	20416825	esv3595480	NONE	0	0.010101	0	Absent	NO_DUP_NO_DEL	NA	NA	NA	NA	NA	NA	1.984724	0.211047	NA	NA	948.377	948.377	14851.599	NONE
3	20416873	20417313	esv3595481	NONE	0	0.010101	0	Absent	NO_DUP_NO_DEL	NA	NA	NA	NA	NA	NA	1.984724	-0.556546	NA	NA	948.377	234.892	14851.599	NONE
3	21009497	21013508	esv3595494	NONE	0	0.040404	0.101942	Absent	DEL_OR_PARTIAL_DEL	NA	NA	NA	NA	NA	NA	1.359201	-3.07699	0.88014	-2.898991	2807.07	2003.21	246064.9673	NONE
3	21723722	21725954	esv3595516	NONE	0.0694444	0.0606061	0.135922	Ancient	NO_DUP_NO_DEL	NA	NA	NA	NA	4.378268	0.273765	5.144422	0.036381	4.965804	0.041131	50799.1	41127.2	2070715.15	NONE
3	21756515	21757805	esv3595517	NONE	0	0	0.0194175	Absent	NO_DUP_NO_DEL	NA	NA	NA	NA	NA	NA	NA	NA	-0.356926	-0.356926	786.766	786.766	NA	NONE
3	21991553	21993631	esv3595531	NONE	0.0648148	0	0	Absent	NO_DUP_NO_DEL	NA	NA	NA	NA	1.154176	1.154176	NA	NA	NA	NA	30386.7	26235.7	766829.7	NONE
3	22279327	22286414	esv3595541	NONE	0.101852	0.0252525	0.0631068	Absent	NO_DUP_NO_DEL	NA	NA	NA	NA	-0.149043	-0.149043	-0.996591	-0.996591	-0.814061	-0.814061	21845.3	21845.3	NA	NONE
3	22907514	22910937	esv3595553	NONE	0.0277778	0	0	Absent	NO_DUP_NO_DEL	NA	NA	NA	NA	0.679472	0.679472	NA	NA	NA	NA	1809.28	1550.05	NA	NONE
3	23088835	23092112	esv3595556	NONE	0.0416667	0	0	Absent	NO_DUP_NO_DEL	NA	NA	NA	NA	-0.119042	-0.119042	NA	NA	NA	NA	2296.11	2227.84	220116.085	NONE
3	23233524	23234174	esv3595559	NONE	0	0.0151515	0	Absent	NO_DUP_NO_DEL	NA	NA	NA	NA	NA	NA	1.349287	1.349287	NA	NA	722.635	722.635	7382.396	NONE
3	23513987	23518649	esv3595563	NONE	0.037037	0	0	Absent	NO_DUP_NO_DEL	NA	NA	NA	NA	-0.155475	-0.155475	NA	NA	NA	NA	2624.76	2624.76	92557.92	NONE
3	23685700	23686174	esv3595567	NONE	0	0.0555556	0.194175	Ancient	NO_DUP_NO_DEL	NA	NA	NA	NA	NA	NA	-0.308856	-0.308856	0.410304	0.410304	22212.2	22212.2	496671	NONE
3	23913189	23914490	esv3595568	NONE	0	0	0.0145631	Absent	NO_DUP_NO_DEL	NA	NA	NA	NA	NA	NA	NA	NA	1.002771	-1.090775	651.846	562.394	NA	NONE
3	24780902	24785635	esv3595589	NONE	0.0462963	0	0.00485437	Absent	NO_DUP_NO_DEL	NA	NA	NA	NA	0.198534	0.198534	NA	NA	NA	NA	1810.08	1810.08	34923.756	NONE
3	24802890	24804506	esv3595590	NONE	0.00925926	0	0	Absent	NO_DUP_NO_DEL	NA	NA	NA	NA	0.493776	0.493776	NA	NA	NA	NA	7888.51	1143.91	82780.012	NONE
3	25030880	25032246	esv3595595	NONE	0.550926	0.333333	0.543689	Absent	NO_DUP_NO_DEL	NA	NA	NA	NA	0.706846	0.529857	2.282944	2.069636	2.269022	0.20121	36262.8	16748.6	730343.4727	NONE
3	25849760	25855460	esv3595613	NONE	0.0324074	0	0	Absent	NO_DUP_NO_DEL	NA	NA	NA	NA	0.711164	-0.545682	NA	NA	NA	NA	16386.4	4659.44	280220.36	NONE
3	26450940	26452301	esv3595637	NONE	0.00925926	0.520202	0.315534	Absent	NO_DUP_NO_DEL	NA	NA	NA	NA	1.093814	-0.838593	0.514265	-0.857074	0.708823	-1.774218	3902.03	3902.03	561870.344	NONE
3	26451164	26451660	esv3595638	NONE	0.00925926	0.520202	0.315534	Absent	NO_DUP_NO_DEL	NA	NA	NA	NA	1.093814	-0.838593	0.514265	-0.857074	0.708823	-1.774218	3902.03	3902.03	561870.344	NONE
3	26461522	26463052	esv3595639	NONE	0.0324074	0	0	Absent	NO_DUP_NO_DEL	NA	NA	NA	NA	1.59902	1.59902	NA	NA	NA	NA	40915.7	1753.35	177700.2123	NONE
3	28392087	28393315	esv3595686	NONE	0.0601852	0.00505051	0	Absent	NO_DUP_NO_DEL	NA	NA	NA	NA	2.006492	0.323461	0.545143	-0.722723	NA	NA	11461.2	11461.2	148861.6267	NONE
3	28639495	28644442	esv3595693	NONE	0.00925926	0	0	Absent	NO_DUP_NO_DEL	NA	NA	NA	NA	0.029451	0.029451	NA	NA	NA	NA	866.714	866.714	216187.44	NONE
3	28765934	28766552	esv3595700	NONE	0.0138889	0	0	Absent	NO_DUP_NO_DEL	NA	NA	NA	NA	1.001044	0.359225	NA	NA	NA	NA	3805.8	2739.9	223812.0656	NONE
3	28809969	28817808	esv3595701	NONE	0	0.010101	0	Introgressed	NO_DUP_NO_DEL	NA	NA	NA	NA	NA	NA	2.103173	-0.69554	NA	NA	1972.09	1429.35	590789.2157	NONE
3	29401628	29402854	esv3595714	NONE	0.0277778	0	0	Absent	NO_DUP_NO_DEL	NA	NA	NA	NA	2.978093	0.358465	NA	NA	NA	NA	1367.73	942.168	92773.758	NONE
3	30067459	30071110	esv3595730	NONE	0.0185185	0	0	Absent	NO_DUP_NO_DEL	NA	NA	NA	NA	0.949421	0.239662	NA	NA	NA	NA	40852.3	3806.54	284280.7158	NONE
3	30994735	30999842	esv3595742	NONE	0.0462963	0	0	Absent	NO_DUP_NO_DEL	NA	NA	NA	NA	2.215695	-0.055272	NA	NA	NA	NA	8991.45	6709.91	NA	NONE
3	32806741	32808056	esv3595781	NONE	0.671296	0.742424	0.786408	Absent	NO_DUP_NO_DEL	NA	NA	NA	NA	-0.389809	-0.576577	-0.434599	-0.434599	0.272441	0.272441	55410.1	53680.9	606331.6	NONE
3	33421845	33422633	esv3595794	NONE	0	0	0.0291262	Absent	NO_DUP_NO_DEL	NA	NA	NA	NA	NA	NA	NA	NA	1.160943	1.160943	748.543	748.543	NA	NONE
3	34119667	34120477	esv3595800	NONE	0.0185185	0	0	Absent	NO_DUP_NO_DEL	NA	NA	NA	NA	-0.069094	-0.069094	NA	NA	NA	NA	3866.83	1375.87	NA	NONE
3	36711608	36719277	esv3595870	NONE	0.00925926	0	0	Absent	NO_DUP_NO_DEL	NA	NA	NA	NA	1.238685	-0.868219	NA	NA	NA	NA	3787.28	3787.28	NA	NONE
3	37798413	37800208	esv3595897	NONE	0.0694444	0	0	Absent	NO_DUP_NO_DEL	NA	NA	NA	NA	0.024348	0.024348	NA	NA	NA	NA	1254.54	1254.54	14776.832	NONE
3	39026381	39027875	esv3595919	NONE	0.157407	0.00505051	0	Ancient	NO_DUP_NO_DEL	NA	NA	NA	NA	1.328442	0.626259	2.248736	-0.157465	NA	NA	33626	33582.2	707477.8433	NONE
3	40753752	40754435	esv3595956	NONE	0	0.0151515	0	Absent	NO_DUP_NO_DEL	NA	NA	NA	NA	NA	NA	NA	NA	NA	NA	NA	NA	NA	NONE
3	41416869	41418502	esv3595969	NONE	0.0972222	0	0.213592	Absent	NO_DUP_NO_DEL	NA	NA	NA	NA	2.208744	0.040643	NA	NA	2.205224	0.048709	48489.5	31339.4	1138071.16	NONE
3	41598788	41601039	esv3595976	NONE	0	0	0.0194175	Introgressed	NO_DUP_NO_DEL	NA	NA	NA	NA	NA	NA	NA	NA	1.206593	0.233729	6127.71	4777.65	315957.9003	NONE
3	42639891	42640531	esv3596002	NONE	0.0231481	0	0	Absent	NO_DUP_NO_DEL	NA	NA	NA	NA	3.018781	0.700205	NA	NA	NA	NA	4594.55	3259.24	206934.9497	NONE
3	45496766	45497805	esv3596049	NONE	0	0.020202	0	Absent	NO_DUP_NO_DEL	NA	NA	NA	NA	NA	NA	1.14441	-0.549161	NA	NA	1247.99	1247.99	NA	NONE
3	46605821	46606737	esv3596063	NONE	0.00925926	0	0	Absent	NO_DUP_NO_DEL	NA	NA	NA	NA	0.707956	0.707956	NA	NA	NA	NA	364.633	337.745	NA	NONE
3	47984926	47987969	esv3596096	NONE	0	0.0151515	0	Absent	NO_DUP_NO_DEL	NA	NA	NA	NA	NA	NA	-1.771585	-1.771585	NA	NA	1228.63	1228.63	NA	NONE
3	48942710	48946201	esv3596115	NONE	0.0138889	0	0	Absent	NO_DUP_NO_DEL	NA	NA	NA	NA	1.255376	-0.597696	NA	NA	NA	NA	7531.11	4365.29	78400.23333	NONE
3	50443407	50444839	esv3596144	NONE	0	0	0.126214	Absent	NO_DUP_NO_DEL	NA	NA	NA	NA	NA	NA	NA	NA	-1.692689	-1.692689	1324.76	1324.76	77909.02	NONE
3	50942050	50954963	esv3596148	NONE	0.0185185	0	0	Absent	NO_DUP_NO_DEL	NA	NA	NA	NA	4.443668	0.037448	NA	NA	NA	NA	24240.5	24061.8	360151.7877	NONE
3	51053171	51058778	esv3596151	NONE	0.0231481	0	0	Absent	NO_DUP_NO_DEL	NA	NA	NA	NA	-0.579217	-0.579217	NA	NA	NA	NA	1339.19	1339.19	23771.167	NONE
3	53046588	53047797	esv3596165	NONE	0.0601852	0	0	Absent	NO_DUP_NO_DEL	NA	NA	NA	NA	2.335616	1.897009	NA	NA	NA	NA	14472.3	7983.75	138484.243	NONE
3	56607750	56621624	esv3596213	NONE	0	0	0.126214	Absent	NO_DUP_NO_DEL	NA	NA	NA	NA	NA	NA	NA	NA	-1.429802	-1.429802	1468.22	1468.22	51921.24	NONE
3	56982835	56986306	esv3596221	NONE	0.0138889	0	0	Absent	NO_DUP_NO_DEL	NA	NA	NA	NA	3.410257	-0.034498	NA	NA	NA	NA	1481.01	1363.68	180218.325	NONE
3	57877534	57878791	esv3596237	NONE	0	0	0.038835	Absent	NO_DUP_NO_DEL	NA	NA	NA	NA	NA	NA	NA	NA	-0.872203	-0.872203	933.591	933.591	90807.08	NONE
3	58534782	58537332	esv3596251	NONE	0.592593	0.0454545	0.228155	Absent	DEL_OR_PARTIAL_DEL	NA	NA	NA	NA	1.805737	0.742758	4.497055	2.892644	4.67687	3.000052	66218.8	40547.7	1126010.55	NONE
3	58798126	58801938	esv3596257	NONE	0.037037	0	0	Absent	NO_DUP_NO_DEL	NA	NA	NA	NA	0.098267	0.098267	NA	NA	NA	NA	5786.71	1503.34	NA	NONE
3	61127169	61128172	esv3596333	NONE	0	0.0505051	0	Absent	NO_DUP_NO_DEL	NA	NA	NA	NA	NA	NA	-0.313104	-0.313104	NA	NA	3038.37	3038.37	45345.398	NONE
3	61416016	61416806	esv3596342	NONE	0	0.0151515	0	Absent	NO_DUP_NO_DEL	NA	NA	NA	NA	NA	NA	NA	NA	NA	NA	791.03	791.03	NA	NONE
3	62610534	62612183	esv3596375	NONE	0.106481	0	0	Absent	NO_DUP_NO_DEL	NA	NA	NA	NA	1.540155	-0.299075	NA	NA	NA	NA	2917.56	2917.56	223827.17	NONE
3	62711315	62715989	esv3596378	NONE	0.0509259	0	0	Absent	NO_DUP_NO_DEL	NA	NA	NA	NA	0.363965	0.363965	NA	NA	NA	NA	8414.95	3827.59	281119.7993	NONE
3	63134847	63135305	esv3596388	NONE	0.212963	0.0454545	0.0728155	Recurrent	NO_DUP_NO_DEL	NA	NA	NA	NA	0.799336	0.027152	3.597586	-0.434106	2.208383	-0.127682	22452.3	22452.3	872412.52	NONE
3	65117753	65119706	esv3596414	NONE	0.0416667	0.0606061	0.0339806	Absent	NO_DUP_NO_DEL	NA	NA	NA	NA	1.039632	1.039632	0.919908	0.919908	-0.239902	-0.239902	6522.34	6522.34	618099.51	NONE
3	65123010	65123543	esv3596415	NONE	0.111111	0.0656566	0.00485437	Absent	NO_DUP_NO_DEL	NA	NA	NA	NA	0.07189	0.07189	-0.971919	-0.971919	-1.408851	-1.408851	11265.9	11265.9	160298.88	NONE
3	65188826	65214723	esv3596416	NONE	0	0.0757576	0.0339806	Absent	NO_DUP_NO_DEL	NA	NA	NA	NA	NA	NA	4.390453	-0.83061	5.33515	-0.638414	2939.39	2608.88	151865.397	NONE
3	66054571	66055518	esv3596433	NONE	0.0462963	0	0	Absent	NO_DUP_NO_DEL	NA	NA	NA	NA	2.714933	0.027735	NA	NA	NA	NA	37056.2	2040.13	191262.932	NONE
3	67562033	67563622	esv3596460	NONE	0.087963	0	0	Absent	NO_DUP_NO_DEL	NA	NA	NA	NA	1.225771	-0.729154	NA	NA	NA	NA	30745.8	30745.8	198261.1633	NONE
3	67571966	67573328	esv3596461	NONE	0.00925926	0	0	Absent	NO_DUP_NO_DEL	NA	NA	NA	NA	1.643428	1.643428	NA	NA	NA	NA	2388.47	2137.72	78813.434	NONE
3	68634740	68640254	esv3596484	NONE	0.273148	0.338384	0.815534	Absent	NO_DUP_NO_DEL	NA	NA	NA	NA	0.159222	-0.72366	4.669624	3.380467	0.663955	-0.273658	48591.7	48591.7	681058.9333	NONE
3	68739655	68747879	esv3596486	NONE	0.453704	0.651515	0.883495	Absent	NO_DUP_NO_DEL	NA	NA	NA	NA	0.409723	-0.56897	0.550638	-1.341055	0.29158	-2.57555	58267	54697.6	696938.9	NONE
3	69316901	69318692	esv3596495	NONE	0.00925926	0	0	Absent	NO_DUP_NO_DEL	NA	NA	NA	NA	5.457956	1.961645	NA	NA	NA	NA	28894.4	2610.76	160938.8416	NONE
3	72000669	72002836	esv3596530	NONE	0.00925926	0	0	Absent	NO_DUP_NO_DEL	NA	NA	NA	NA	-0.424383	-0.424383	NA	NA	NA	NA	928.173	928.173	97015.1	NONE
3	73939038	73939386	esv3596564	NONE	0.152778	0.0151515	0	Absent	NO_DUP_NO_DEL	NA	NA	NA	NA	-0.022082	-0.022082	-0.484771	-0.484771	NA	NA	21708.3	21708.3	NA	NONE
3	74147584	74154796	esv3596567	NONE	0.037037	0	0	Absent	NO_DUP_NO_DEL	NA	NA	NA	NA	0.352801	-0.229681	NA	NA	NA	NA	11140.5	11140.5	153411.5209	NONE
3	74402750	74407165	esv3596573	NONE	0.0231481	0	0	Absent	NO_DUP_NO_DEL	NA	NA	NA	NA	-0.592146	-0.592146	NA	NA	NA	NA	1758.27	1758.27	NA	NONE
3	74565355	74566008	esv3596575	NONE	0.138889	0	0	Absent	NO_DUP_NO_DEL	NA	NA	NA	NA	-0.778967	-0.778967	NA	NA	NA	NA	16418.2	16418.2	331613.66	NONE
3	74807804	74812949	esv3596581	NONE	0.0462963	0	0	Absent	NO_DUP_NO_DEL	NA	NA	NA	NA	2.674034	-0.372489	NA	NA	NA	NA	8967.31	8168.62	70012.66475	NONE
3	75433678	75434440	esv3596600	NONE	0.0462963	0	0	Absent	NO_DUP_NO_DEL	NA	NA	NA	NA	1.161751	0.047963	NA	NA	NA	NA	9686.58	5880.64	98935.62	NONE
3	75583324	75590596	esv3596609	NONE	0.324074	0.419192	0.436893	Absent	NO_DUP_NO_DEL	NA	NA	NA	NA	NA	NA	NA	NA	NA	NA	61533.2	61194.8	NA	NONE
3	76083640	76096073	esv3596624	NONE	0.00925926	0	0	Absent	NO_DUP_NO_DEL	NA	NA	NA	NA	5.887647	0.528355	NA	NA	NA	NA	3036.6	1657.2	73640.8295	NONE
3	77809742	77813874	esv3596666	NONE	0.0509259	0	0	Absent	NO_DUP_NO_DEL	NA	NA	NA	NA	1.101323	-0.148323	NA	NA	NA	NA	17501.7	16117.5	863838.388	NONE
3	77909072	77910243	esv3596670	NONE	0.00925926	0	0	Absent	NO_DUP_NO_DEL	NA	NA	NA	NA	1.172018	1.172018	NA	NA	NA	NA	4619.96	274.906	NA	NONE
3	78342659	78343176	esv3596681	NONE	0.0925926	0	0	Absent	NO_DUP_NO_DEL	NA	NA	NA	NA	-0.84565	-0.84565	NA	NA	NA	NA	1692.15	1692.15	161586.74	NONE
3	78371304	78372051	esv3596682	NONE	0.0509259	0	0	Absent	NO_DUP_NO_DEL	NA	NA	NA	NA	0.892589	0.448684	NA	NA	NA	NA	4636	3026.02	332859.5875	NONE
3	78587887	78589337	esv3596685	NONE	0.0185185	0	0	Absent	NO_DUP_NO_DEL	NA	NA	NA	NA	0.573161	0.121991	NA	NA	NA	NA	2232.98	2232.98	NA	NONE
3	79960816	79961241	esv3596710	NONE	0	0.00505051	0.0485437	Absent	NO_DUP_NO_DEL	NA	NA	NA	NA	NA	NA	NA	NA	NA	NA	NA	NA	NA	NONE
3	80062916	80064350	esv3596711	NONE	0.287037	0.60101	0.601942	Absent	NO_DUP_NO_DEL	NA	NA	NA	NA	-0.014036	-0.534736	-0.392344	-2.005964	0.200002	-1.891646	38698.8	30289.1	638999.865	NONE
3	80361316	80362811	esv3596717	NONE	0.00925926	0	0	Absent	NO_DUP_NO_DEL	NA	NA	NA	NA	3.406526	2.06713	NA	NA	NA	NA	5394.56	3811.71	117812.9867	NONE
3	80402024	80405847	esv3596720	NONE	0.00925926	0	0	Absent	NO_DUP_NO_DEL	NA	NA	NA	NA	1.352193	-0.085024	NA	NA	NA	NA	5958.57	5758.87	386880.3018	NONE
3	81222876	81223930	esv3596744	NONE	0.0185185	0	0	Absent	NO_DUP_NO_DEL	NA	NA	NA	NA	-0.577264	-0.577264	NA	NA	NA	NA	2381.4	2358.21	40956.72	NONE
3	82868833	82872878	esv3596774	NONE	0.125	0.0757576	0.0194175	Absent	NO_DUP_NO_DEL	NA	NA	NA	NA	1.058634	-0.296713	4.668248	-0.912886	4.529325	-0.120269	3083.84	2235.64	534951.1785	NONE
3	82909126	82911280	esv3596775	NONE	0.0231481	0.00505051	0	Absent	NO_DUP_NO_DEL	NA	NA	NA	NA	0.461904	0.317356	1.330566	-0.356779	NA	NA	3935.59	3661.07	74679.71	NONE
3	83017233	83020228	esv3596778	NONE	0.0462963	0	0	Ancient	NO_DUP_NO_DEL	NA	NA	NA	NA	1.995842	0.751319	NA	NA	NA	NA	18655.7	5707.39	448377.0667	NONE
3	83339283	83342730	esv3596788	NONE	0.0277778	0	0	Absent	NO_DUP_NO_DEL	NA	NA	NA	NA	2.026838	0.626971	NA	NA	NA	NA	26617.2	3394.2	NA	NONE
3	83859883	83863636	esv3596800	NONE	0.0277778	0	0	Absent	NO_DUP_NO_DEL	NA	NA	NA	NA	1.9045	-0.35486	NA	NA	NA	NA	44064.3	4304.98	299832.442	NONE
3	84104923	84107402	esv3596808	NONE	0	0.207071	0.18932	Absent	NO_DUP_NO_DEL	NA	NA	NA	NA	NA	NA	1.36124	-0.384549	1.093135	-0.615506	38228.7	3827.49	392925.3944	NONE
3	84470977	84477323	esv3596817	NONE	0.0231481	0	0	Absent	NO_DUP_NO_DEL	NA	NA	NA	NA	3.133174	1.235573	NA	NA	NA	NA	2167.91	2152.76	NA	NONE
3	86622745	86624135	esv3596868	NONE	0.0231481	0	0	Absent	NO_DUP_NO_DEL	NA	NA	NA	NA	3.899941	0.312979	NA	NA	NA	NA	8875.33	7940.72	39471.12925	NONE
3	87701740	87703224	esv3596894	NONE	0.106481	0	0	Absent	NO_DUP_NO_DEL	NA	NA	NA	NA	2.676139	0.388508	NA	NA	NA	NA	32504.4	22782.6	384586.692	NONE
3	87888973	87903491	esv3596902	NONE	0.037037	0	0	Absent	NO_DUP_NO_DEL	NA	NA	NA	NA	0.684556	-0.103906	NA	NA	NA	NA	10779.7	10557.9	213104.8426	NONE
3	88457330	88465494	esv3596921	NONE	0.00925926	0	0	Absent	NO_DUP_NO_DEL	NA	NA	NA	NA	NA	NA	NA	NA	NA	NA	NA	NA	NA	NONE
3	89670049	89678142	esv3596967	NONE	0.00462963	0.0353535	0	Absent	NO_DUP_NO_DEL	NA	NA	NA	NA	1.035408	-0.572715	1.888445	1.888445	NA	NA	787.945	787.945	17649.0454	NONE
3	90453975	90456307	esv3597001	NONE	0.00925926	0	0	Absent	DEL_OR_PARTIAL_DEL	NA	NA	NA	NA	NA	NA	NA	NA	NA	NA	28427.3	4875.16	NA	NONE
3	90464913	90467200	esv3597003	NONE	0.212963	0.00505051	0	Absent	DEL_OR_PARTIAL_DEL	NA	NA	NA	NA	NA	NA	NA	NA	NA	NA	17247	11485	NA	NONE
3	90487470	90490386	esv3597005	NONE	0.0138889	0	0	Absent	DEL_OR_PARTIAL_DEL	NA	NA	NA	NA	NA	NA	NA	NA	NA	NA	833.614	833.614	NA	NONE
3	93954860	93958526	esv3597018	NONE	0.0324074	0	0	Ancient	NO_DUP_NO_DEL	NA	NA	NA	NA	1.817968	0.962488	NA	NA	NA	NA	34792	5429.06	999036.766	NONE
3	95146876	95149587	esv3597045	NONE	0.0138889	0	0	Absent	NO_DUP_NO_DEL	NA	NA	NA	NA	1.080286	0.296134	NA	NA	NA	NA	5367.42	4046.64	NA	NONE
3	95465761	95468120	esv3597054	NONE	0.305556	0.388889	0.393204	Absent	NO_DUP_NO_DEL	NA	NA	NA	NA	0.209215	-1.55619	1.532018	-2.981185	1.337207	-3.128406	64291.1	45325.2	586959.0094	NONE
3	95699140	95714789	esv3597062	NONE	0.0138889	0	0	Absent	NO_DUP_NO_DEL	NA	NA	NA	NA	1.090082	1.090082	NA	NA	NA	NA	3985.64	1181.12	22261.925	NONE
3	96050615	96051872	esv3597067	NONE	0.148148	0	0	Absent	NO_DUP_NO_DEL	NA	NA	NA	NA	1.87829	0.264845	NA	NA	NA	NA	19497.8	11849.4	225318.128	NONE
3	97220079	97221661	esv3597097	NONE	0.0231481	0	0	Absent	NO_DUP_NO_DEL	NA	NA	NA	NA	-0.023433	-0.023433	NA	NA	NA	NA	887.496	887.496	12951.974	NONE
3	98943804	98949516	esv3597140	NONE	0	0.272727	0	Absent	NO_DUP_NO_DEL	NA	NA	NA	NA	NA	NA	0.164546	0.164546	NA	NA	1199.4	1199.4	174975.08	NONE
3	99243255	99244884	esv3597152	NONE	0.0740741	0	0	Absent	NO_DUP_NO_DEL	NA	NA	NA	NA	1.741482	-0.094625	NA	NA	NA	NA	17338.5	2841.67	306688.5338	NONE
3	99628781	99629631	esv3597161	NONE	0.0787037	0.277778	0.15534	Absent	NO_DUP_NO_DEL	NA	NA	NA	NA	2.436071	0.398782	0.637906	-1.077905	0.775487	-1.608985	88663.6	5768.14	366236.4	NONE
3	99922681	99924937	esv3597169	NONE	0.199074	0	0.140777	Absent	NO_DUP_NO_DEL	NA	NA	NA	NA	0.260066	0.260066	NA	NA	-1.470762	-1.470762	38343.3	38343.3	218713.88	NONE
3	100521568	100522471	esv3597180	NONE	0	0.267677	0.0679612	Introgressed	NO_DUP_NO_DEL	NA	NA	NA	NA	NA	NA	6.45899	1.85001	7.443872	2.131091	28786.5	2805.6	1740986.865	NONE
3	100669240	100670862	esv3597183	NONE	0.0185185	0	0	Absent	NO_DUP_NO_DEL	NA	NA	NA	NA	0.909045	-0.814954	NA	NA	NA	NA	9671.29	7784.7	132145.405	NONE
3	101251485	101253982	esv3597188	NONE	0.0277778	0	0	Absent	NO_DUP_NO_DEL	NA	NA	NA	NA	2.10585	-0.450622	NA	NA	NA	NA	7398.5	4503.03	247753.2937	NONE
3	101357527	101359730	esv3597190	NONE	0.111111	0.136364	0.131068	Absent	NO_DUP_NO_DEL	NA	NA	NA	NA	-0.836094	-1.114326	-1.354001	-2.315313	0.075869	-1.934226	3254.09	2636.79	304570.8867	NONE
3	101412167	101419455	esv3597193	NONE	0.0324074	0	0	Absent	NO_DUP_NO_DEL	NA	NA	NA	NA	0.463088	0.135308	NA	NA	NA	NA	33389.2	6391.36	102726.2936	NONE
3	101521218	101521776	esv3597196	NONE	0.0416667	0	0	Absent	NO_DUP_NO_DEL	NA	NA	NA	NA	0.060422	-1.188877	NA	NA	NA	NA	4088.8	3245.18	44187.185	NONE
3	102807611	102810507	esv3597218	NONE	0.0138889	0	0	Absent	NO_DUP_NO_DEL	NA	NA	NA	NA	-0.428536	-0.428536	NA	NA	NA	NA	2991.58	2991.58	NA	NONE
3	103593811	103603285	esv3597235	NONE	0.0138889	0	0	Absent	NO_DUP_NO_DEL	NA	NA	NA	NA	3.041671	0.736147	NA	NA	NA	NA	1825.45	1127.98	204469.1196	NONE
3	103870224	103870829	esv3597242	NONE	0	0	0.0679612	Absent	NO_DUP_NO_DEL	NA	NA	NA	NA	NA	NA	NA	NA	0.43724	0.43724	1476.91	1476.91	38672.2	NONE
3	103922941	103925286	esv3597244	NONE	0.0277778	0	0	Absent	NO_DUP_NO_DEL	NA	NA	NA	NA	0.679012	-1.769118	NA	NA	NA	NA	11062.7	10643.4	212382.68	NONE
3	104278168	104279030	esv3597257	NONE	0.0925926	0.378788	0.092233	Absent	NO_DUP_NO_DEL	NA	NA	NA	NA	1.136122	1.136122	3.823418	3.814777	0.711277	0.623349	2508.42	2037.48	243614.35	NONE
3	104291795	104300447	esv3597258	NONE	0.00925926	0	0	Absent	NO_DUP_NO_DEL	NA	NA	NA	NA	6.246342	0.455056	NA	NA	NA	NA	3969.55	1225.27	1301298.344	NONE
3	104400122	104401608	esv3597261	NONE	0.0138889	0	0	Absent	NO_DUP_NO_DEL	NA	NA	NA	NA	0.23332	0.23332	NA	NA	NA	NA	514.266	514.266	NA	NONE
3	104411771	104412614	esv3597262	NONE	0.0138889	0	0	Absent	NO_DUP_NO_DEL	NA	NA	NA	NA	0.23332	0.23332	NA	NA	NA	NA	514.266	514.266	NA	NONE
3	107037955	107040334	esv3597307	NONE	0.384259	0.323232	0.791262	Recurrent	NO_DUP_NO_DEL	NA	NA	NA	NA	3.957063	0.983273	5.801156	1.605015	6.429191	0.770111	43599.1	26614.3	NA	NONE
3	107997419	107998041	esv3597321	NONE	0.0416667	0	0	Absent	NO_DUP_NO_DEL	NA	NA	NA	NA	0.231212	-0.872517	NA	NA	NA	NA	5467.11	5309.13	280941.64	NONE
3	108400580	108402197	esv3597328	NONE	0.12037	0	0	Absent	NO_DUP_NO_DEL	NA	NA	NA	NA	0.744564	0.373368	NA	NA	NA	NA	59674.1	21192.3	167247.92	NONE
3	108583727	108587026	esv3597332	NONE	0.0231481	0	0	Absent	NO_DUP_NO_DEL	NA	NA	NA	NA	1.644773	1.644773	NA	NA	NA	NA	1543.79	1080.53	141323.329	NONE
3	108599221	108600080	esv3597335	NONE	0.0462963	0	0	Absent	NO_DUP_NO_DEL	NA	NA	NA	NA	1.358825	1.358825	NA	NA	NA	NA	1438.29	1438.29	NA	NONE
3	108630759	108632701	esv3597337	NONE	0.00925926	0.00505051	0	Absent	NO_DUP_NO_DEL	NA	NA	NA	NA	3.348786	3.348786	3.848671	3.848671	NA	NA	1200.49	1200.49	NA	NONE
3	108964431	108966678	esv3597345	NONE	0.0185185	0	0	Absent	NO_DUP_NO_DEL	NA	NA	NA	NA	1.474796	-0.745328	NA	NA	NA	NA	10387.3	8271.82	86101.505	NONE
3	109414882	109416298	esv3597358	NONE	0.0462963	0	0	Absent	NO_DUP_NO_DEL	NA	NA	NA	NA	1.640169	0.458392	NA	NA	NA	NA	28918.4	14734.5	549498.46	NONE
3	110667097	110670229	esv3597382	NONE	0.00925926	0	0	Absent	NO_DUP_NO_DEL	NA	NA	NA	NA	4.919928	-0.66171	NA	NA	NA	NA	4307	334.392	867150.6967	NONE
3	110694257	110699082	esv3597383	NONE	0.0324074	0	0	Absent	NO_DUP_NO_DEL	NA	NA	NA	NA	-0.340518	-0.644176	NA	NA	NA	NA	4124.19	4124.19	NA	NONE
3	111243593	111248855	esv3597393	NONE	0.273148	0.313131	0.0873786	Absent	NO_DUP_NO_DEL	NA	NA	NA	NA	NA	NA	NA	NA	NA	NA	NA	NA	NA	NONE
3	114656928	114668576	esv3597466	NONE	0.365741	0.00505051	0.00970874	Absent	NO_DUP_NO_DEL	NA	NA	NA	NA	0.605516	0.605516	3.627226	-1.420363	4.2877	-1.635423	32677.9	16188.7	832182.1822	NONE
3	116204459	116218332	esv3597492	NONE	0.00925926	0	0	Absent	NO_DUP_NO_DEL	NA	NA	NA	NA	2.176594	0.591401	NA	NA	NA	NA	3791.7	3440.89	390717.6	NONE
3	116204836	116205180	esv3597493	NONE	0.189815	0.181818	0.436893	Absent	NO_DUP_NO_DEL	NA	NA	NA	NA	3.589871	2.915684	3.826224	2.999645	2.819064	2.63899	41642.2	35617.4	1519885.8	NONE
3	116523376	116526826	esv3597500	NONE	0.0277778	0	0	Absent	NO_DUP_NO_DEL	NA	NA	NA	NA	1.903815	1.903815	NA	NA	NA	NA	3432.51	3428.23	223241.592	NONE
3	117770251	117776191	esv3597534	NONE	0.00925926	0	0	Absent	NO_DUP_NO_DEL	NA	NA	NA	NA	1.797056	1.797056	NA	NA	NA	NA	725.243	725.243	16834.02	NONE
3	118281607	118281829	esv3597538	NONE	0.319444	0.823232	0.84466	Absent	NO_DUP_NO_DEL	NA	NA	NA	NA	-0.346873	-0.346873	-0.673593	-0.673593	-0.816956	-0.816956	47542	47542	480683	NONE
3	119419882	119420336	esv3597567	NONE	0.194444	0.146465	0.247573	Absent	NO_DUP_NO_DEL	NA	NA	NA	NA	4.09722	2.873578	6.530461	5.133325	9.035636	5.869112	28327.5	27554.7	1417417.978	NONE
3	119655167	119656859	esv3597569	NONE	0.0277778	0	0	Absent	NO_DUP_NO_DEL	NA	NA	NA	NA	1.752323	-0.423959	NA	NA	NA	NA	1504.46	1279.97	NA	NONE
3	119893984	119894448	esv3597570	NONE	0.847222	0.929293	0.927184	Ancient	NO_DUP_NO_DEL	NA	NA	NA	NA	2.870275	0.643006	3.618038	0.527832	3.838711	0.839209	72834.5	62698.6	1148584.003	NONE
3	121062061	121065629	esv3597592	NONE	0.0138889	0	0	Absent	NO_DUP_NO_DEL	NA	NA	NA	NA	1.149299	0.195822	NA	NA	NA	NA	6745.15	2231.18	NA	NONE
3	122082125	122082746	esv3597607	NONE	0.0462963	0	0	Absent	NO_DUP_NO_DEL	NA	NA	NA	NA	-0.21862	-0.21862	NA	NA	NA	NA	2359.39	2359.39	138443.48	NONE
3	123315415	123316945	esv3597627	NONE	0.0138889	0	0	Absent	NO_DUP_NO_DEL	NA	NA	NA	NA	0.870659	0.209213	NA	NA	NA	NA	5039.74	2097.64	NA	NONE
3	125398960	125399871	esv3597661	NONE	0.25	0.0505051	0.0679612	Ancient	DEL_OR_PARTIAL_DEL	NA	NA	NA	NA	NA	NA	NA	NA	NA	NA	58918.2	45565.8	NA	NONE
3	125563034	125567720	esv3597670	NONE	0.00925926	0	0	Absent	NO_DUP_NO_DEL	NA	NA	NA	NA	NA	NA	NA	NA	NA	NA	4683.65	3705.68	NA	NONE
3	125672301	125676371	esv3597673	NONE	0.50463	0.20202	0.0291262	Absent	NO_DUP_NO_DEL	NA	NA	NA	NA	1.487141	1.281786	1.342881	1.342881	1.52707	1.52707	40496.1	33937.7	396387.635	NONE
3	125712247	125722076	esv3597674	NONE	0.125	0	0	Absent	NO_DUP_NO_DEL	NA	NA	NA	NA	1.614261	1.077099	NA	NA	NA	NA	19785.7	6424.39	214522.2489	NONE
3	127529693	127530117	esv3597701	NONE	0.203704	0	0	Absent	NO_DUP_NO_DEL	NA	NA	NA	NA	-0.549287	-0.549287	NA	NA	NA	NA	27030.5	27030.5	239581.02	NONE
3	128410586	128415481	esv3597722	NONE	0	0	0.00970874	Absent	NO_DUP_NO_DEL	NA	NA	NA	NA	NA	NA	NA	NA	-0.881951	-0.881951	1216.6	1209.78	NA	NONE
3	128465576	128466800	esv3597725	NONE	0.0648148	0	0	Absent	NO_DUP_NO_DEL	NA	NA	NA	NA	2.297185	-0.08146	NA	NA	NA	NA	52800.1	3983.54	NA	NONE
3	129046095	129047387	esv3597736	NONE	0	0.0151515	0	Absent	NO_DUP_NO_DEL	NA	NA	NA	NA	NA	NA	4.141443	-0.766515	NA	NA	784.219	629.511	19045.985	NONE
3	129048130	129048753	esv3597737	NONE	0.259259	0	0	Absent	NO_DUP_NO_DEL	NA	NA	NA	NA	2.092156	-0.20513	NA	NA	NA	NA	29067.9	3133.55	382600.7467	NONE
3	129075845	129082792	esv3597738	NONE	0.574074	0.0656566	0.315534	Ancient	NO_DUP_NO_DEL	NA	NA	NA	NA	6.461882	2.769367	16.603375	2.956649	14.633522	3.694388	37678.6	25282.7	2595171.305	NONE
3	129774132	129780957	esv3597755	NONE	0.138889	0.40404	0.262136	Absent	NO_DUP_NO_DEL	NA	NA	NA	NA	0.435126	-2.568402	-1.649866	-7.58366	1.811976	-2.593771	35178.9	35178.9	NA	NONE
3	131546139	131547024	esv3597807	NONE	0.0138889	0	0	Absent	NO_DUP_NO_DEL	NA	NA	NA	NA	3.795647	3.795647	NA	NA	NA	NA	3573.16	1532.24	74251.905	NONE
3	131708252	131713384	esv3597813	NONE	0.00925926	0.348485	0.359223	Absent	NO_DUP_NO_DEL	NA	NA	NA	NA	-0.942844	-0.942844	-0.523616	-0.523616	-0.613073	-0.759483	27288	25775.1	520258.2	NONE
3	132330418	132332905	esv3597828	NONE	0.0277778	0	0	Absent	NO_DUP_NO_DEL	NA	NA	NA	NA	-0.168903	-0.168903	NA	NA	NA	NA	31734.5	31734.5	9842.336	NONE
3	132718627	132723951	esv3597836	NONE	0.226852	0	0	Absent	NO_DUP_NO_DEL	NA	NA	NA	NA	1.089394	0.50112	NA	NA	NA	NA	10013.3	8626.28	402151.14	NONE
3	135697032	135701146	esv3597881	NONE	0.0509259	0	0	Absent	NO_DUP_NO_DEL	NA	NA	NA	NA	0.616076	0.616076	NA	NA	NA	NA	2306.63	2306.63	57694.28	NONE
3	136515180	136517702	esv3597893	NONE	0.0277778	0	0	Absent	NO_DUP_NO_DEL	NA	NA	NA	NA	0.173722	-0.796504	NA	NA	NA	NA	2686.36	1469.68	136005.6973	NONE
3	137029377	137044017	esv3597899	NONE	0.0462963	0.00505051	0	Absent	NO_DUP_NO_DEL	NA	NA	NA	NA	-0.793313	-0.793313	-1.312892	-1.312892	NA	NA	2277.1	2277.1	8141.56	NONE
3	137314460	137316441	esv3597902	NONE	0.236111	0.0808081	0.0194175	Absent	NO_DUP_NO_DEL	NA	NA	NA	NA	0.636465	0.636465	-0.130255	-0.130255	-1.626922	-1.626922	4029.29	4029.29	NA	NONE
3	138602785	138604076	esv3597926	NONE	0.00925926	0	0	Absent	NO_DUP_NO_DEL	NA	NA	NA	NA	3.642268	2.71773	NA	NA	NA	NA	22100.4	6665.24	236734.4109	NONE
3	139003740	139005342	esv3597936	NONE	0.0185185	0	0	Absent	NO_DUP_NO_DEL	NA	NA	NA	NA	3.924024	1.563822	NA	NA	NA	NA	2401.75	1587.96	1203668.13	NONE
3	140522349	140523517	esv3597964	NONE	0	0	0.0970874	Introgressed	NO_DUP_NO_DEL	NA	NA	NA	NA	NA	NA	NA	NA	7.460025	2.262466	15054.4	2512.03	3087959.017	NONE
3	140544407	140547047	esv3597966	NONE	0.319444	0.257576	0.582524	Absent	NO_DUP_NO_DEL	NA	NA	NA	NA	0.408011	0.370009	0.905431	0.827636	-0.238114	-0.238114	21251.1	19091.4	NA	NONE
3	140760337	140765195	esv3597968	NONE	0.0185185	0	0	Absent	NO_DUP_NO_DEL	NA	NA	NA	NA	-0.604779	-0.604779	NA	NA	NA	NA	1165.77	1158.97	NA	NONE
3	141683948	141685852	esv3597992	NONE	0.037037	0	0	Absent	NO_DUP_NO_DEL	NA	NA	NA	NA	-0.155571	-0.58995	NA	NA	NA	NA	1818.93	1384.67	16210.964	NONE
3	141849749	141852486	esv3597998	NONE	0.208333	0.00505051	0.00970874	Absent	NO_DUP_NO_DEL	NA	NA	NA	NA	-0.108707	-1.035062	NA	NA	3.120776	0.497047	23620.4	16853.9	309784.4633	NONE
3	142610366	142612743	esv3598011	NONE	0.0138889	0	0	Absent	NO_DUP_NO_DEL	NA	NA	NA	NA	2.157864	2.153657	NA	NA	NA	NA	24964.5	4830.51	447874.9065	NONE
3	143219590	143221215	esv3598021	NONE	0.125	0	0	Absent	NO_DUP_NO_DEL	NA	NA	NA	NA	-0.895418	-0.895418	NA	NA	NA	NA	21966.7	21966.7	1401591.8	NONE
3	144281417	144293275	esv3598038	NONE	0.0277778	0	0	Absent	NO_DUP_NO_DEL	NA	NA	NA	NA	0.188361	0.188361	NA	NA	NA	NA	556.333	556.333	18652.93733	NONE
3	144888422	144888910	esv3598057	NONE	0.0833333	0.434343	0.228155	Absent	NO_DUP_NO_DEL	NA	NA	NA	NA	1.360046	-0.205403	4.053461	1.128965	3.868628	1.395323	32449.5	29540.5	1080160.2	NONE
3	145644966	145649185	esv3598082	NONE	0.217593	0.378788	0.101942	Absent	NO_DUP_NO_DEL	NA	NA	NA	NA	2.690826	-0.230462	2.830332	-0.973639	0.704625	-1.216946	25502.3	13594.8	553361.326	NONE
3	146385228	146390409	esv3598100	NONE	0.87037	0.676768	0.572816	Ancient	NO_DUP_NO_DEL	NA	NA	NA	NA	10.229328	6.355848	9.15247	5.807281	9.858841	6.311432	55648.7	34260.9	2241121.892	NONE
3	146415335	146417891	esv3598101	NONE	0.0277778	0	0	Absent	NO_DUP_NO_DEL	NA	NA	NA	NA	0.521163	-0.501142	NA	NA	NA	NA	7476.21	7476.21	NA	NONE
3	146427446	146428289	esv3598102	NONE	0.0324074	0	0	Absent	NO_DUP_NO_DEL	NA	NA	NA	NA	3.074571	1.436292	NA	NA	NA	NA	10238.7	10177	NA	NONE
3	147627177	147628081	esv3598124	NONE	0.037037	0	0	Absent	NO_DUP_NO_DEL	NA	NA	NA	NA	1.296859	1.296859	NA	NA	NA	NA	30448.2	30448.2	335850.06	NONE
3	147836953	147839922	esv3598125	NONE	0.106481	0	0	Absent	NO_DUP_NO_DEL	NA	NA	NA	NA	1.957191	0.13524	NA	NA	NA	NA	16617.3	13731.8	400075.5267	NONE
3	148410848	148413240	esv3598131	NONE	0.0185185	0	0	Absent	NO_DUP_NO_DEL	NA	NA	NA	NA	2.545141	0.571262	NA	NA	NA	NA	9263.61	9263.61	331796.5	NONE
3	148827568	148830820	esv3598138	NONE	0	0.0252525	0.00485437	Introgressed	DEL_OR_PARTIAL_DEL	NA	NA	NA	NA	NA	NA	2.014313	-1.360093	2.673586	-1.717464	31256.2	3865.11	284963.8313	NONE
3	148963333	148969710	esv3598142	NONE	0.00462963	0.0252525	0.0436893	Absent	NO_DUP_NO_DEL	NA	NA	NA	NA	0.865011	0.865011	-0.634524	-0.977841	1.82163	1.82163	20501.9	16969.2	226457.07	NONE
3	149230997	149231978	esv3598146	NONE	0.0324074	0	0	Absent	NO_DUP_NO_DEL	NA	NA	NA	NA	-0.031733	-0.126573	NA	NA	NA	NA	28767.3	28767.3	471590.042	NONE
3	150553858	150555776	esv3598166	NONE	0.143519	0	0	Absent	NO_DUP_NO_DEL	NA	NA	NA	NA	2.453037	0.905025	NA	NA	NA	NA	26831.3	22584	1069297.277	NONE
3	151764935	151765381	esv3598195	NONE	0.0601852	0	0.203883	Absent	NO_DUP_NO_DEL	NA	NA	NA	NA	2.646228	1.7196	NA	NA	3.580539	2.369521	23078.8	4846.46	1126874.753	NONE
3	152346864	152355915	esv3598211	NONE	0	0.00505051	0.00485437	Introgressed	NO_DUP_NO_DEL	NA	NA	NA	NA	NA	NA	5.339281	0.136516	5.148954	0.862141	5713.72	2251.87	279342.397	NONE
3	152723006	152724161	esv3598219	NONE	0.00925926	0	0	Absent	NO_DUP_NO_DEL	NA	NA	NA	NA	1.287551	-0.285691	NA	NA	NA	NA	3003.54	432.225	7445.69	NONE
3	153217423	153218779	esv3598229	NONE	0	0	0.00970874	Absent	NO_DUP_NO_DEL	NA	NA	NA	NA	NA	NA	NA	NA	-0.878188	-0.878188	521.254	521.254	5775.434	NONE
3	153465022	153470189	esv3598236	NONE	0.0509259	0	0	Absent	NO_DUP_NO_DEL	NA	NA	NA	NA	2.067547	0.3265	NA	NA	NA	NA	20812.8	1268.42	39672.7905	NONE
3	153599221	153613941	esv3598240	NONE	0	0	0.0145631	Absent	NO_DUP_NO_DEL	NA	NA	NA	NA	NA	NA	NA	NA	3.162979	3.162979	767.257	754.165	NA	NONE
3	153746543	153747870	esv3598246	NONE	0.00925926	0	0	Absent	NO_DUP_NO_DEL	NA	NA	NA	NA	4.59309	-0.268407	NA	NA	NA	NA	5803.41	2767.91	141052.8	NONE
3	155757150	155759190	esv3598293	NONE	0.00925926	0	0	Absent	NO_DUP_NO_DEL	NA	NA	NA	NA	6.73837	6.73837	NA	NA	NA	NA	438.135	438.135	NA	NONE
3	156092162	156093688	esv3598301	NONE	0.564815	0.156566	0.0485437	Absent	NO_DUP_NO_DEL	NA	NA	NA	NA	1.784192	1.633323	2.882613	-0.356266	2.496187	-1.065662	38551.1	33763.3	796552.596	NONE
3	157339275	157343044	esv3598314	NONE	0.0138889	0	0	Absent	NO_DUP_NO_DEL	NA	NA	NA	NA	1.001834	1.001834	NA	NA	NA	NA	341.131	341.131	NA	NONE
3	158898201	158900704	esv3598360	NONE	0.0416667	0	0	Absent	NO_DUP_NO_DEL	NA	NA	NA	NA	0.486966	-0.059541	NA	NA	NA	NA	4604.88	4604.88	135787.358	NONE
3	160234065	160235658	esv3598385	NONE	0.0555556	0	0	Absent	NO_DUP_NO_DEL	NA	NA	NA	NA	0.949608	0.117374	NA	NA	NA	NA	23375.5	4555	NA	NONE
3	160680272	160686012	esv3598396	NONE	0	0.010101	0	Absent	NO_DUP_NO_DEL	NA	NA	NA	NA	NA	NA	0.493597	0.493597	NA	NA	590.981	590.981	26444.964	NONE
3	160696507	160698494	esv3598397	NONE	0	0.010101	0	Absent	NO_DUP_NO_DEL	NA	NA	NA	NA	NA	NA	-0.775191	-0.775191	NA	NA	647.184	628.639	NA	NONE
3	162448908	162449811	esv3598436	NONE	0.00925926	0.0505051	0.0776699	Absent	NO_DUP_NO_DEL	NA	NA	NA	NA	NA	NA	0.335739	0.335739	1.106976	1.106976	4076.92	2347.65	131644.94	NONE
3	162512202	162525833	esv3598438	NONE	0.546296	0.30303	0.878641	Ancient	NO_DUP_NO_DEL	NA	NA	NA	NA	0.624596	-0.27176	3.2236	-0.100155	3.810772	-0.06029	45772.1	5421.09	1002923.32	NONE
3	162514471	162625647	esv3598439	NONE	0.546296	0.30303	0.878641	Ancient	NO_DUP_NO_DEL	NA	NA	NA	NA	2.612665	1.936107	4.641483	4.641483	5.687823	4.718743	57369.7	45404.4	1740087.611	NONE
3	162558858	162601552	esv3598441	NONE	0.546296	0.30303	0.878641	Ancient	NO_DUP_NO_DEL	NA	NA	NA	NA	1.936107	1.936107	4.641483	4.641483	4.718743	4.718743	45404.4	45404.4	1209485.2	NONE
3	162717258	162723563	esv3598444	NONE	0.407407	0.439394	0.456311	Absent	NO_DUP_NO_DEL	NA	NA	NA	NA	4.221794	1.961172	5.082986	2.691697	6.276175	3.208792	26412.9	20396.5	2132296.345	NONE
3	162764905	162769085	esv3598446	NONE	0.810185	0.722222	0.980583	Absent	NO_DUP_NO_DEL	NA	NA	NA	NA	6.092334	2.375356	8.016241	4.377155	11.332797	7.590961	56415.8	40512.9	2267349.666	NONE
3	164097636	164113645	esv3598480	NONE	0	0	0.00970874	Absent	NO_DUP_NO_DEL	NA	NA	NA	NA	NA	NA	NA	NA	0.143786	0.143786	706.574	706.574	NA	NONE
3	164102917	164119239	esv3598481	NONE	0	0	0.00970874	Absent	NO_DUP_NO_DEL	NA	NA	NA	NA	NA	NA	NA	NA	0.143786	0.143786	706.574	706.574	NA	NONE
3	165263402	165296646	esv3598504	NONE	0.0462963	0	0	Absent	NO_DUP_NO_DEL	NA	NA	NA	NA	0.142819	-1.176698	NA	NA	NA	NA	4034.32	681.155	46828.656	NONE
3	165264524	165269269	esv3598505	NONE	0.0462963	0.00505051	0	Absent	NO_DUP_NO_DEL	NA	NA	NA	NA	0.142819	-1.176698	NA	NA	NA	NA	4034.32	681.155	46828.656	NONE
3	165654325	165655583	esv3598524	NONE	0.0231481	0	0	Absent	NO_DUP_NO_DEL	NA	NA	NA	NA	2.594632	-0.600324	NA	NA	NA	NA	4418.48	2610.4	38199.665	NONE
3	166054713	166056091	esv3598534	NONE	0.162037	0	0	Absent	NO_DUP_NO_DEL	NA	NA	NA	NA	6.217952	1.870254	NA	NA	NA	NA	24998.4	21764.3	2087724.994	NONE
3	166844615	166849275	esv3598558	NONE	0.180556	0	0.0582524	Absent	NO_DUP_NO_DEL	NA	NA	NA	NA	2.277234	-2.77255	NA	NA	2.507376	-3.758734	7517.55	3565.14	534680.1062	NONE
3	168263347	168264369	esv3598578	NONE	0.037037	0	0	Absent	NO_DUP_NO_DEL	NA	NA	NA	NA	0.899707	0.847109	NA	NA	NA	NA	5860.47	5797.63	328537.4766	NONE
3	168428946	168432644	esv3598584	NONE	0.00925926	0	0	Absent	NO_DUP_NO_DEL	NA	NA	NA	NA	0.803193	0.56495	NA	NA	NA	NA	18576.8	14801.7	155905.7267	NONE
3	168755186	168756543	esv3598588	NONE	0.0185185	0	0	Absent	NO_DUP_NO_DEL	NA	NA	NA	NA	1.874164	0.873605	NA	NA	NA	NA	8637.76	2971.17	NA	NONE
3	169641305	169642153	esv3598615	NONE	0	0	0.00970874	Absent	NO_DUP_NO_DEL	NA	NA	NA	NA	NA	NA	NA	NA	-0.279038	-0.279038	297.698	215.363	NA	NONE
3	170062624	170063795	esv3598625	NONE	0.152778	0	0	Absent	NO_DUP_NO_DEL	NA	NA	NA	NA	-0.143723	-1.225708	NA	NA	NA	NA	4605.52	4242.09	238171.08	NONE
3	170356077	170358509	esv3598629	NONE	0	0	0.0242718	Absent	NO_DUP_NO_DEL	NA	NA	NA	NA	NA	NA	NA	NA	1.543814	-2.134872	633.712	633.712	40278.448	NONE
3	173207888	173217861	esv3598693	NONE	0.0416667	0	0	Absent	NO_DUP_NO_DEL	NA	NA	NA	NA	7.698583	6.771691	NA	NA	NA	NA	37756	32744	2596702.389	NONE
3	173240736	173241904	esv3598697	NONE	0	0.030303	0.00485437	Introgressed	NO_DUP_NO_DEL	NA	NA	NA	NA	NA	NA	4.309852	0.315705	4.366527	2.147149	15715.2	2435.12	523282.0469	NONE
3	174077063	174080655	esv3598726	NONE	0.0277778	0	0	Absent	NO_DUP_NO_DEL	NA	NA	NA	NA	0.264889	0.007119	NA	NA	NA	NA	3988.18	3988.18	244695.458	NONE
3	175079070	175083846	esv3598742	NONE	0.0833333	0.10101	0.140777	Ancient	NO_DUP_NO_DEL	NA	NA	NA	NA	3.203861	-7.30E-05	1.288843	-1.627798	1.310198	-2.262834	20173.9	7885.67	849722.664	NONE
3	175885553	175915007	esv3598758	NONE	0	0.030303	0	Absent	NO_DUP_NO_DEL	NA	NA	NA	NA	NA	NA	-1.603493	-1.603493	NA	NA	669.44	669.44	23031.372	NONE
3	176194720	176197944	esv3598768	NONE	0	0.0151515	0	Absent	NO_DUP_NO_DEL	NA	NA	NA	NA	NA	NA	-0.467638	-0.467638	NA	NA	716.731	716.731	26099.584	NONE
3	176691358	176710323	esv3598780	NONE	0.00925926	0	0	Absent	NO_DUP_NO_DEL	NA	NA	NA	NA	0.119032	-0.01064	NA	NA	NA	NA	2862.54	1394.18	41792.10933	NONE
3	177294475	177297489	esv3598800	NONE	0	0.0656566	0	Absent	NO_DUP_NO_DEL	NA	NA	NA	NA	NA	NA	-0.820478	-0.820478	NA	NA	3397.87	3397.87	126126.42	NONE
3	177381336	177385447	esv3598804	NONE	0.138889	0.0858586	0	Absent	NO_DUP_NO_DEL	NA	NA	NA	NA	1.527503	0.918001	1.525632	0.164121	NA	NA	25168.1	8145.56	1833939.333	NONE
3	178550124	178550897	esv3598826	NONE	0.958333	0.606061	0.271845	Ancient	NO_DUP_NO_DEL	NA	NA	NA	NA	7.171532	1.54633	7.229017	1.85712	6.337893	1.955487	56295.5	39973.1	2210308.426	NONE
3	178567629	178568339	esv3598828	NONE	0.037037	0.277778	0.0436893	Absent	NO_DUP_NO_DEL	NA	NA	NA	NA	5.088468	0.69649	1.223471	-0.22962	0.412288	-0.542207	4072.06	1576.26	455100.408	NONE
3	179264607	179267996	esv3598844	NONE	0.0787037	0	0.00485437	Absent	NO_DUP_NO_DEL	NA	NA	NA	NA	0.109545	-1.103287	NA	NA	0.00777	-1.634838	4180.93	4180.93	52001.81	NONE
3	180917895	180918620	esv3598886	NONE	0	0.0252525	0	Absent	NO_DUP_NO_DEL	NA	NA	NA	NA	NA	NA	-1.381897	-1.381897	NA	NA	604.33	604.33	20184.822	NONE
3	181640918	181643445	esv3598898	NONE	0.00925926	0	0	Absent	NO_DUP_NO_DEL	NA	NA	NA	NA	0.803902	0.803902	NA	NA	NA	NA	2142.82	2142.82	NA	NONE
3	183876797	183877385	esv3598939	NONE	0.527778	0.494949	0.538835	Ancient	NO_DUP_NO_DEL	NA	NA	NA	NA	2.54825	-0.721611	2.902969	-0.293228	4.897777	-0.788698	43226.1	43226.1	603876	NONE
3	185100842	185109232	esv3598968	NONE	0	0	0.0145631	Absent	NO_DUP_NO_DEL	NA	NA	NA	NA	NA	NA	NA	NA	-0.276605	-0.276605	644.213	644.213	55955.606	NONE
3	185565495	185567699	esv3598975	NONE	0.0231481	0	0	Absent	NO_DUP_NO_DEL	NA	NA	NA	NA	-0.12816	-0.12816	NA	NA	NA	NA	14756.2	14756.2	142716.623	NONE
3	186094727	186096799	esv3598988	NONE	0.171296	0	0	Absent	NO_DUP_NO_DEL	NA	NA	NA	NA	3.845482	0.979189	NA	NA	NA	NA	16949	5156.72	2355142.191	NONE
3	189224472	189225385	esv3599055	NONE	0.0185185	0.0252525	0	Absent	NO_DUP_NO_DEL	NA	NA	NA	NA	2.775327	2.430723	3.096299	1.882358	NA	NA	6938.54	2132.57	343286.82	NONE
3	189363410	189370903	esv3599059	NONE	0.203704	0.0808081	0.398058	Absent	NO_DUP_NO_DEL	NA	NA	NA	NA	4.579083	-0.01447	5.639644	-0.52561	3.36815	-0.152053	22153.8	10863.7	996473.9157	NONE
3	189737175	189740648	esv3599063	NONE	0.199074	0.328283	0.529126	Absent	NO_DUP_NO_DEL	NA	NA	NA	NA	1.807545	-0.23838	1.200824	-0.279217	0.868552	-1.427762	26814.9	25106.8	455670.88	NONE
3	190787021	190788046	esv3599083	NONE	0.226852	0	0	Absent	NO_DUP_NO_DEL	NA	NA	NA	NA	3.901144	0.419309	NA	NA	NA	NA	16766.8	16766.8	336512.1433	NONE
3	191011204	191013666	esv3599101	NONE	0.037037	0	0	Absent	NO_DUP_NO_DEL	NA	NA	NA	NA	0.509654	0.509654	NA	NA	NA	NA	3245.72	3245.72	775414.283	NONE
3	191064690	191071659	esv3599104	NONE	0.0740741	0.267677	0	Absent	NO_DUP_NO_DEL	NA	NA	NA	NA	-0.416014	-0.416014	-0.166037	-0.166037	NA	NA	11102.6	11102.6	101525.62	NONE
3	191240443	191246711	esv3599109	NONE	0.0138889	0	0	Absent	NO_DUP_NO_DEL	NA	NA	NA	NA	0.044608	-0.635958	NA	NA	NA	NA	907.494	907.494	191870	NONE
3	191264238	191266195	esv3599110	NONE	0	0.0858586	0.0582524	Absent	NO_DUP_NO_DEL	NA	NA	NA	NA	NA	NA	-0.975363	-0.975363	-0.593931	-0.593931	2911.83	2911.83	NA	NONE
3	191788578	191794386	esv3599134	NONE	0.0324074	0	0	Absent	NO_DUP_NO_DEL	NA	NA	NA	NA	-0.086487	-0.086487	NA	NA	NA	NA	3410.04	3410.04	34302.464	NONE
3	191889929	191891307	esv3599137	NONE	0	0.0454545	0.0145631	Introgressed	NO_DUP_NO_DEL	NA	NA	NA	NA	NA	NA	8.905999	5.055228	9.535785	5.20803	17474.1	11877	2667129.998	NONE
3	191897196	191897942	esv3599138	NONE	0.0231481	0	0	Absent	NO_DUP_NO_DEL	NA	NA	NA	NA	1.383971	-0.113707	NA	NA	NA	NA	2751.69	2751.69	115622.64	NONE
3	192264658	192268305	esv3599152	NONE	0	0	0.00970874	Absent	NO_DUP_NO_DEL	NA	NA	NA	NA	NA	NA	NA	NA	1.014921	1.014921	535.546	535.546	NA	NONE
3	192304862	192312839	esv3599155	NONE	0	0.010101	0	Introgressed	NO_DUP_NO_DEL	NA	NA	NA	NA	NA	NA	0.337211	-0.04532	NA	NA	5783.02	1115.36	196921.536	NONE
3	192389851	192392048	esv3599157	NONE	0	0.0606061	0	Introgressed	NO_DUP_NO_DEL	NA	NA	NA	NA	NA	NA	0.094491	-1.318088	NA	NA	21375.7	3217.15	95005.9425	NONE
3	192597973	192609937	esv3599162	NONE	0.0185185	0	0	Absent	NO_DUP_NO_DEL	NA	NA	NA	NA	0.270887	0.270887	NA	NA	NA	NA	1210.08	1210.08	73327.24	NONE
3	192602270	192603849	esv3599163	NONE	0.0185185	0	0	Absent	NO_DUP_NO_DEL	NA	NA	NA	NA	0.270887	0.270887	NA	NA	NA	NA	1210.08	1210.08	73327.24	NONE
3	192744357	192744899	esv3599171	NONE	0.393519	0.464646	0.631068	Absent	NO_DUP_NO_DEL	NA	NA	NA	NA	3.130294	1.583022	1.512487	-0.805811	1.88743	-0.776093	5084.77	3966.47	572394.97	NONE
3	192875329	192885405	esv3599177	NONE	0.472222	0.646465	0.898058	Absent	NO_DUP_NO_DEL	NA	NA	NA	NA	0.440727	-0.372273	-0.061817	-0.43744	6.421356	-0.013943	30841.4	24018.4	576373.6873	NONE
3	193135464	193142938	esv3599184	NONE	0.0601852	0.010101	0.199029	Absent	DEL_OR_PARTIAL_DEL	NA	NA	NA	NA	0.96322	0.451014	-0.043696	-0.778766	-0.729463	-0.963618	22638.5	12871.4	119682.36	NONE
3	193192216	193196503	esv3599186	NONE	0.00925926	0	0	Absent	NO_DUP_NO_DEL	NA	NA	NA	NA	2.107444	-0.806625	NA	NA	NA	NA	1735.61	1054.96	94062.5924	NONE
3	194355344	194356602	esv3599210	NONE	0.0555556	0.00505051	0	Absent	NO_DUP_NO_DEL	NA	NA	NA	NA	0.584656	0.49223	-0.827707	-0.911228	NA	NA	26721.4	26721.4	484550.5	NONE
3	194398762	194400296	esv3599213	NONE	0.481481	0.727273	0.873786	Absent	NO_DUP_NO_DEL	NA	NA	NA	NA	5.222817	1.500224	4.707085	1.977429	3.469498	0.969548	42130.9	36333.2	2152730.267	NONE
3	194442031	194444321	esv3599216	NONE	0.00925926	0	0	Absent	NO_DUP_NO_DEL	NA	NA	NA	NA	1.796766	-0.277351	NA	NA	NA	NA	23679.4	6106.52	364831.54	NONE
3	194560581	194568562	esv3599219	NONE	0.0185185	0	0	Absent	NO_DUP_NO_DEL	NA	NA	NA	NA	2.13695	2.13695	NA	NA	NA	NA	4208.36	4208.36	38858.736	NONE
3	194710814	194714330	esv3599227	NONE	0	0.010101	0	Absent	NO_DUP_NO_DEL	NA	NA	NA	NA	NA	NA	-0.072132	-0.072132	NA	NA	470.544	470.544	NA	NONE
3	195133538	195144630	esv3599234	NONE	0	0	0.00970874	Absent	NO_DUP_NO_DEL	NA	NA	NA	NA	NA	NA	NA	NA	-1.057385	-1.057385	212.599	212.599	NA	NONE
3	195198396	195222983	esv3599238	NONE	0.592593	0.60101	0.849515	Ancient	NO_DUP_NO_DEL	NA	NA	NA	NA	0.64298	0.64298	0.618098	0.618098	2.700012	2.700012	58286.4	58286.4	854932.4	NONE
3	195569206	195569923	esv3599255	NONE	0.305556	0.292929	0.791262	Absent	NO_DUP_NO_DEL	NA	NA	NA	NA	NA	NA	NA	NA	NA	NA	32789.5	32789.5	483378	NONE
3	195773919	195774981	esv3599265	NONE	0.0231481	0.0454545	0.621359	Absent	NO_DUP_NO_DEL	NA	NA	NA	NA	NA	NA	-0.052559	-0.052559	0.700769	0.700769	3071.14	3071.14	NA	NONE
3	195926633	195928422	esv3599274	NONE	0.0277778	0	0	Absent	NO_DUP_NO_DEL	NA	NA	NA	NA	0.83466	0.83466	NA	NA	NA	NA	3213.59	3213.59	355430.04	NONE
3	196130914	196132260	esv3599283	NONE	0	0	0.0145631	Absent	NO_DUP_NO_DEL	NA	NA	NA	NA	NA	NA	NA	NA	1.442113	-0.178116	1362.17	1362.17	41213.256	NONE
3	196342066	196343251	esv3599290	NONE	0	0.010101	0	Absent	NO_DUP_NO_DEL	NA	NA	NA	NA	NA	NA	1.88311	-0.14551	NA	NA	27197.4	3883.58	93370.676	NONE
3	196494411	196498609	esv3599294	NONE	0.0138889	0	0	Absent	NO_DUP_NO_DEL	NA	NA	NA	NA	0.575665	0.388001	NA	NA	NA	NA	25570.9	568.963	9446.388	NONE
3	196565720	196566733	esv3599298	NONE	0.111111	0.00505051	0	Absent	NO_DUP_NO_DEL	NA	NA	NA	NA	3.045976	1.825739	16.818909	5.962217	NA	NA	26012.7	13037.2	2573074.013	NONE
3	196934563	196939253	esv3599303	NONE	0	0.176768	0.0825243	Absent	NO_DUP_NO_DEL	NA	NA	NA	NA	NA	NA	0.415347	0.008377	0.624144	0.313336	12975.2	6645.5	251430.3867	NONE
3	197050451	197057068	esv3599305	NONE	0	0.0151515	0	Absent	NO_DUP_NO_DEL	NA	NA	NA	NA	NA	NA	-0.199916	-0.199916	NA	NA	616.083	616.083	NA	NONE
3	197307326	197314512	esv3599315	NONE	0.0601852	0	0	Absent	NO_DUP_NO_DEL	NA	NA	NA	NA	1.245371	1.245371	NA	NA	NA	NA	28227.9	28227.9	1129251.368	NONE
3	197781683	197783599	esv3599336	NONE	0.0185185	0	0	Absent	NO_DUP_NO_DEL	NA	NA	NA	NA	NA	NA	NA	NA	NA	NA	1964.51	1964.51	NA	NONE
4	1609471	1611501	esv3599393	NONE	0.00925926	0	0	Absent	NO_DUP_NO_DEL	NA	NA	NA	NA	1.15578	1.15578	NA	NA	NA	NA	1102.18	838.364	NA	NONE
4	2550339	2551281	esv3599406	NONE	0	0.0555556	0	Absent	DEL_OR_PARTIAL_DEL	NA	NA	NA	NA	NA	NA	NA	NA	NA	NA	1126.89	1126.89	NA	NONE
4	3491885	3493256	esv3599433	NONE	0	0.0151515	0	Recurrent	NO_DUP_NO_DEL	NA	NA	NA	NA	NA	NA	-0.415883	-0.415883	NA	NA	1125.05	485.715	NA	NONE
4	4154472	4157122	esv3599454	NONE	0.0694444	0.0656566	0.412621	Absent	NO_DUP_NO_DEL	NA	NA	NA	NA	NA	NA	NA	NA	NA	NA	26838	26838	NA	NONE
4	5405614	5412150	esv3599482	NONE	0.0138889	0	0	Absent	NO_DUP_NO_DEL	NA	NA	NA	NA	0.657302	0.657302	NA	NA	NA	NA	2561.31	2561.31	20975.08	NONE
4	6682399	6685862	esv3599510	NONE	0.231481	0.0505051	0.242718	Absent	NO_DUP_NO_DEL	NA	NA	NA	NA	NA	NA	NA	NA	NA	NA	NA	NA	NA	NONE
4	6897351	6900401	esv3599513	NONE	0.523148	0.545455	0.393204	Recurrent	NO_DUP_NO_DEL	NA	NA	NA	NA	0.697299	0.428527	1.435857	1.435857	1.305365	0.853864	37764.4	21226.4	575913.8	NONE
4	9104534	9126906	esv3599559	NONE	0.0277778	0.0555556	0.0873786	Absent	DUP	NA	NA	NA	NA	NA	NA	NA	NA	NA	NA	19153.4	3828.76	NA	NONE
4	9863700	9865954	esv3599596	NONE	0.0138889	0	0	Absent	NO_DUP_NO_DEL	NA	NA	NA	NA	1.895385	1.895385	NA	NA	NA	NA	4841.63	4214.08	NA	NONE
4	11041500	11042657	esv3599639	NONE	0.166667	0	0	Absent	NO_DUP_NO_DEL	NA	NA	NA	NA	0.110044	-0.921135	NA	NA	NA	NA	4770.11	4770.11	460661.964	NONE
4	11666558	11670697	esv3599656	NONE	0.0972222	0	0	Absent	NO_DUP_NO_DEL	NA	NA	NA	NA	2.468105	0.083731	NA	NA	NA	NA	29699	16870.2	222436.354	NONE
4	11935338	11936131	esv3599666	NONE	0	0.0656566	0	Introgressed	NO_DUP_NO_DEL	NA	NA	NA	NA	NA	NA	3.308571	0.924146	NA	NA	22760.6	1941.82	310070.4305	NONE
4	12153837	12157169	esv3599673	NONE	0	0.0505051	0	Introgressed	NO_DUP_NO_DEL	NA	NA	NA	NA	NA	NA	1.183895	0.711076	NA	NA	2141.75	2020.1	798442.4061	NONE
4	12159337	12162881	esv3599674	NONE	0	0.0505051	0	Introgressed	NO_DUP_NO_DEL	NA	NA	NA	NA	NA	NA	1.183895	0.313095	NA	NA	2141.75	1827.47	798442.4061	NONE
4	14376136	14377220	esv3599721	NONE	0.00925926	0	0	Absent	NO_DUP_NO_DEL	NA	NA	NA	NA	-0.402105	-0.402105	NA	NA	NA	NA	341.614	341.614	NA	NONE
4	15760381	15768825	esv3599742	NONE	0.0185185	0	0	Absent	NO_DUP_NO_DEL	NA	NA	NA	NA	1.986559	1.986559	NA	NA	NA	NA	22869.3	19359.4	102069.8	NONE
4	16153415	16154307	esv3599747	NONE	0.00925926	0	0	Absent	NO_DUP_NO_DEL	NA	NA	NA	NA	1.135612	0.165606	NA	NA	NA	NA	4556.89	4356.83	85687.5208	NONE
4	17036083	17040153	esv3599768	NONE	0.0185185	0	0	Absent	NO_DUP_NO_DEL	NA	NA	NA	NA	2.669089	1.665036	NA	NA	NA	NA	13281.9	3011.96	83332.48	NONE
4	18769420	18769868	esv3599798	NONE	0.0833333	0	0	Absent	NO_DUP_NO_DEL	NA	NA	NA	NA	-0.123348	-0.129157	NA	NA	NA	NA	1783.89	1783.89	112490.994	NONE
4	19735120	19739696	esv3599821	NONE	0.037037	0	0	Absent	NO_DUP_NO_DEL	NA	NA	NA	NA	2.008262	-0.265414	NA	NA	NA	NA	5381.72	2270.04	145303.9868	NONE
4	19823059	19824935	esv3599824	NONE	0.0185185	0	0	Absent	NO_DUP_NO_DEL	NA	NA	NA	NA	2.414991	-0.067034	NA	NA	NA	NA	3128.61	2130.92	610944.88	NONE
4	20407542	20408530	esv3599842	NONE	0	0.186869	0.456311	Absent	NO_DUP_NO_DEL	NA	NA	NA	NA	NA	NA	-0.265469	-1.084428	-0.653531	-1.771776	3643.76	3345.73	128643.5033	NONE
4	20555716	20566121	esv3599848	NONE	0.0462963	0.00505051	0	Absent	NO_DUP_NO_DEL	NA	NA	NA	NA	0.953393	-1.095951	0.574693	-2.104372	NA	NA	2387.41	2387.41	NA	NONE
4	21081046	21086626	esv3599856	NONE	0.0324074	0	0	Absent	NO_DUP_NO_DEL	NA	NA	NA	NA	2.462618	1.426723	NA	NA	NA	NA	10856.7	7964.08	NA	NONE
4	21081277	21082590	esv3599857	NONE	0.0324074	0	0	Absent	NO_DUP_NO_DEL	NA	NA	NA	NA	2.462618	1.426723	NA	NA	NA	NA	10856.7	7964.08	NA	NONE
4	21105258	21110763	esv3599858	NONE	0.0555556	0	0	Absent	NO_DUP_NO_DEL	NA	NA	NA	NA	0.157994	-0.502413	NA	NA	NA	NA	9797.28	9338.62	35253.68	NONE
4	22047499	22072085	esv3599890	NONE	0	0.010101	0	Absent	NO_DUP_NO_DEL	NA	NA	NA	NA	NA	NA	-0.324672	-0.324672	NA	NA	902.978	798.319	46254.152	NONE
4	22495655	22497363	esv3599904	NONE	0.0416667	0	0	Absent	NO_DUP_NO_DEL	NA	NA	NA	NA	1.358433	-0.062846	NA	NA	NA	NA	1156.6	1014.11	116378.6167	NONE
4	22663115	22666260	esv3599911	NONE	0.134259	0	0	Absent	NO_DUP_NO_DEL	NA	NA	NA	NA	1.872015	-0.131387	NA	NA	NA	NA	13521.1	4248.79	393401.148	NONE
4	24966460	24967138	esv3599951	NONE	0.143519	0	0.0339806	Absent	NO_DUP_NO_DEL	NA	NA	NA	NA	1.36347	1.36347	NA	NA	0.677035	-0.040478	22342.4	15253.5	494299.428	NONE
4	25471114	25472581	esv3599964	NONE	0.0277778	0	0	Absent	NO_DUP_NO_DEL	NA	NA	NA	NA	1.478215	1.478215	NA	NA	NA	NA	4196.02	4196.02	11582.298	NONE
4	26255332	26256393	esv3599983	NONE	0.226852	0.00505051	0	Ancient	NO_DUP_NO_DEL	NA	NA	NA	NA	1.38461	0.569079	2.268018	1.136253	NA	NA	26320.9	20605.6	980669.9	NONE
4	26290280	26295528	esv3599985	NONE	0.0462963	0.0252525	0.092233	Absent	NO_DUP_NO_DEL	NA	NA	NA	NA	1.007239	1.007239	0.828812	0.828812	0.215685	0.215685	3608.58	3608.58	92822.38	NONE
4	26442780	26454174	esv3599987	NONE	0.0231481	0	0	Absent	NO_DUP_NO_DEL	NA	NA	NA	NA	-0.16841	-0.16841	NA	NA	NA	NA	2166.29	2166.29	9091.516	NONE
4	28421593	28421942	esv3600020	NONE	0.333333	0.505051	0.509709	Absent	DEL_OR_PARTIAL_DEL	NA	NA	NA	NA	4.076274	-0.204635	5.141696	0.088881	5.597778	0.408854	54192.1	38222.4	1136871.883	NONE
4	28511962	28513203	esv3600021	NONE	0.101852	0	0	Absent	NO_DUP_NO_DEL	NA	NA	NA	NA	0.488871	-0.547996	NA	NA	NA	NA	53479	53479	176602.8775	NONE
4	28943964	28953049	esv3600031	NONE	0.0324074	0	0	Absent	NO_DUP_NO_DEL	NA	NA	NA	NA	0.261173	-0.489549	NA	NA	NA	NA	3397.11	3397.11	NA	NONE
4	29226564	29233981	esv3600041	NONE	0.0555556	0	0	Absent	NO_DUP_NO_DEL	NA	NA	NA	NA	0.246936	0.246936	NA	NA	NA	NA	2450.35	1782.9	235138.645	NONE
4	29461018	29462168	esv3600047	NONE	0.0231481	0	0	Absent	NO_DUP_NO_DEL	NA	NA	NA	NA	-0.867302	-0.867302	NA	NA	NA	NA	3529.75	3529.75	269173.38	NONE
4	30151415	30152518	esv3600063	NONE	0.0601852	0.00505051	0.0242718	Absent	NO_DUP_NO_DEL	NA	NA	NA	NA	10.704591	3.927106	25.043409	8.075756	21.906285	6.989133	33621.3	26347.1	3130031.961	NONE
4	31013960	31014962	esv3600080	NONE	0	0.0454545	0.281553	Absent	NO_DUP_NO_DEL	NA	NA	NA	NA	NA	NA	1.864098	-0.272515	1.508395	-0.211986	3440.8	2043.64	449923.18	NONE
4	31324905	31330030	esv3600087	NONE	0.0138889	0	0	Absent	NO_DUP_NO_DEL	NA	NA	NA	NA	1.86178	-0.519789	NA	NA	NA	NA	1980.25	1809.23	36929.886	NONE
4	31447961	31450531	esv3600091	NONE	0	0.0151515	0	Absent	NO_DUP_NO_DEL	NA	NA	NA	NA	NA	NA	2.490562	2.490562	NA	NA	633.238	298.839	NA	NONE
4	31463510	31469536	esv3600092	NONE	0	0	0.116505	Ancient	NO_DUP_NO_DEL	NA	NA	NA	NA	NA	NA	NA	NA	0.611546	-1.915783	30825.2	2113.45	184471.6067	NONE
4	32137695	32138926	esv3600107	NONE	0.0833333	0	0	Absent	NO_DUP_NO_DEL	NA	NA	NA	NA	1.182644	1.024802	NA	NA	NA	NA	4600.29	3343.87	202749.12	NONE
4	33065189	33073297	esv3600141	NONE	0.00925926	0	0	Absent	NO_DUP_NO_DEL	NA	NA	NA	NA	4.683002	1.679069	NA	NA	NA	NA	20286.6	3231.45	583942.2727	NONE
4	33085065	33085644	esv3600142	NONE	0.0138889	0	0	Absent	NO_DUP_NO_DEL	NA	NA	NA	NA	0.370587	0.370587	NA	NA	NA	NA	1061.82	1061.82	NA	NONE
4	33085188	33085849	esv3600143	NONE	0.0138889	0	0	Absent	NO_DUP_NO_DEL	NA	NA	NA	NA	0.370587	0.370587	NA	NA	NA	NA	1061.82	1061.82	NA	NONE
4	33378230	33386465	esv3600152	NONE	0.087963	0	0	Absent	NO_DUP_NO_DEL	NA	NA	NA	NA	3.375577	2.553656	NA	NA	NA	NA	4998.7	4225.19	476644.6205	NONE
4	34489238	34491676	esv3600171	NONE	0.00925926	0	0	Absent	DUP	NA	NA	NA	NA	0.920242	0.368111	NA	NA	NA	NA	7642.76	7642.76	NA	NONE
4	34779788	34780532	esv3600179	NONE	0.12963	0.287879	0.0194175	Ancient	NO_DUP_NO_DEL	NA	NA	NA	NA	3.063654	-0.459338	5.105699	1.663613	7.519555	1.402515	17816.4	17816.4	2389725.164	NONE
4	34779933	34828997	esv3600180	NONE	0.12963	0.287879	0.0194175	Ancient	NO_DUP_NO_DEL	NA	NA	NA	NA	3.063654	-2.046357	5.105699	-2.862723	7.519555	-0.529285	17816.4	1838.65	2389725.164	NONE
4	34781317	34849886	esv3600181	NONE	0.12963	0.287879	0.0194175	Ancient	NO_DUP_NO_DEL	NA	NA	NA	NA	3.063654	-0.459338	5.105699	1.663613	7.519555	1.402515	17816.4	17816.4	2389725.164	NONE
4	34956604	34958176	esv3600184	NONE	0.111111	0	0	Absent	NO_DUP_NO_DEL	NA	NA	NA	NA	NA	NA	NA	NA	NA	NA	1932.59	1932.59	NA	NONE
4	35240260	35244433	esv3600190	NONE	0.0972222	0.176768	0.038835	Ancient	NO_DUP_NO_DEL	NA	NA	NA	NA	-0.562721	-0.562721	-0.475418	-0.475418	-0.031801	-0.860276	37186.9	37186.9	658694.8667	NONE
4	35495310	35496885	esv3600194	NONE	0.125	0	0	Absent	NO_DUP_NO_DEL	NA	NA	NA	NA	3.44223	1.67022	NA	NA	NA	NA	4737.44	3729.48	60355.05	NONE
4	35694020	35698441	esv3600200	NONE	0.00925926	0	0	Absent	NO_DUP_NO_DEL	NA	NA	NA	NA	4.802753	2.636473	NA	NA	NA	NA	13292.3	2734.51	NA	NONE
4	35848018	35856606	esv3600208	NONE	0.0462963	0	0	Absent	NO_DUP_NO_DEL	NA	NA	NA	NA	2.790317	1.195384	NA	NA	NA	NA	23921.5	3605.99	211158.8329	NONE
4	35873595	35875293	esv3600209	NONE	0.0277778	0	0	Absent	DUP	NA	NA	NA	NA	0.602389	0.211958	NA	NA	NA	NA	1540.03	1540.03	18074.91	NONE
4	35884489	35884957	esv3600211	NONE	0.0416667	0	0	Absent	NO_DUP_NO_DEL	NA	NA	NA	NA	1.27143	0.30562	NA	NA	NA	NA	14271.5	13279	333802.98	NONE
4	36671803	36673824	esv3600233	NONE	0.0462963	0	0	Absent	NO_DUP_NO_DEL	NA	NA	NA	NA	0.98426	0.021363	NA	NA	NA	NA	2145.62	2039.57	176485.82	NONE
4	37462561	37463774	esv3600245	NONE	0.0231481	0	0	Absent	NO_DUP_NO_DEL	NA	NA	NA	NA	0.099454	0.03622	NA	NA	NA	NA	21977.7	12869.2	344993.3667	NONE
4	38264296	38265498	esv3600257	NONE	0.208333	0.141414	0.00970874	Recurrent	NO_DUP_NO_DEL	NA	NA	NA	NA	0.74987	0.049615	1.692545	-0.244137	2.611075	-0.243154	30020.9	27573	255628.52	NONE
4	39424503	39426357	esv3600281	NONE	0.037037	0	0	Absent	NO_DUP_NO_DEL	NA	NA	NA	NA	2.022473	1.779682	NA	NA	NA	NA	3105.54	3105.54	62858.082	NONE
4	39707736	39712071	esv3600289	NONE	0	0.0151515	0	Absent	NO_DUP_NO_DEL	NA	NA	NA	NA	NA	NA	0.987784	0.987784	NA	NA	1004.35	1004.35	53473.434	NONE
4	39971206	39972864	esv3600295	NONE	0.0185185	0	0	Absent	NO_DUP_NO_DEL	NA	NA	NA	NA	-0.390435	-0.390435	NA	NA	NA	NA	1138.82	1138.82	NA	NONE
4	39994708	39997898	esv3600296	NONE	0.0416667	0	0	Absent	NO_DUP_NO_DEL	NA	NA	NA	NA	NA	NA	NA	NA	NA	NA	8097.62	8097.62	NA	NONE
4	40024928	40026278	esv3600297	NONE	0.37037	0.611111	0.364078	Ancient	NO_DUP_NO_DEL	NA	NA	NA	NA	NA	NA	NA	NA	NA	NA	56236.3	47757.3	NA	NONE
4	40028198	40028934	esv3600298	NONE	0	0	0.0194175	Absent	NO_DUP_NO_DEL	NA	NA	NA	NA	NA	NA	NA	NA	NA	NA	656.196	656.196	NA	NONE
4	40635598	40637180	esv3600314	NONE	0.0416667	0	0	Absent	NO_DUP_NO_DEL	NA	NA	NA	NA	0.173082	0.173082	NA	NA	NA	NA	25067.8	25067.8	NA	NONE
4	41969868	41977780	esv3600343	NONE	0	0.00505051	0.0242718	Absent	NO_DUP_NO_DEL	NA	NA	NA	NA	NA	NA	NA	NA	NA	NA	NA	NA	NA	NONE
4	42706126	42709434	esv3600357	NONE	0.0324074	0.020202	0	Absent	NO_DUP_NO_DEL	NA	NA	NA	NA	1.952965	-0.081415	4.465687	-0.363099	NA	NA	41829.6	32428.9	659210.3117	NONE
4	42762647	42769523	esv3600359	NONE	0.680556	0.146465	0.208738	Ancient	NO_DUP_NO_DEL	NA	NA	NA	NA	6.122353	1.33583	9.253881	0.234558	10.070794	-0.126242	33411.4	28488.1	2689033.441	NONE
4	42905160	42905861	esv3600365	NONE	0.0462963	0.0252525	0.368932	Absent	NO_DUP_NO_DEL	NA	NA	NA	NA	4.314438	0.548881	1.889104	0.126852	1.395721	0.972442	3486.29	2154.61	337921.66	NONE
4	43269154	43269935	esv3600370	NONE	0.0231481	0.00505051	0	Absent	NO_DUP_NO_DEL	NA	NA	NA	NA	7.373813	3.965265	7.371676	3.468433	NA	NA	30820.1	29048.5	1939911.867	NONE
4	43751813	43752122	esv3600378	NONE	0.185185	0.550505	0.567961	Absent	NO_DUP_NO_DEL	NA	NA	NA	NA	3.383659	0.124877	4.650776	-0.163327	5.412472	-0.383955	5994.68	4928.41	375219.62	NONE
4	44323852	44331415	esv3600391	NONE	0.0231481	0	0	Absent	NO_DUP_NO_DEL	NA	NA	NA	NA	1.925711	1.109681	NA	NA	NA	NA	4676.65	3258.16	54343.94	NONE
4	45520652	45527898	esv3600412	NONE	0.0185185	0	0	Absent	NO_DUP_NO_DEL	NA	NA	NA	NA	5.132866	0.561101	NA	NA	NA	NA	42744.8	14662.4	331623.8063	NONE
4	46202797	46205026	esv3600429	NONE	0.134259	0.530303	0.592233	Absent	NO_DUP_NO_DEL	NA	NA	NA	NA	4.094526	-0.001567	7.703595	1.666176	6.946153	1.650797	33556.2	3695.52	929933.34	NONE
4	48718173	48722249	esv3600467	NONE	0.00462963	0.0454545	0.0242718	Absent	NO_DUP_NO_DEL	NA	NA	NA	NA	2.858735	-0.976193	1.201832	-1.435204	2.052142	1.143192	5134.62	1726.4	268400.2883	NONE
4	53212839	53213482	esv3600499	NONE	0.0185185	0	0	Absent	NO_DUP_NO_DEL	NA	NA	NA	NA	2.655366	-0.72763	NA	NA	NA	NA	25182.7	3351.76	180690.6242	NONE
4	53391063	53395437	esv3600506	NONE	0.0555556	0	0	Absent	NO_DUP_NO_DEL	NA	NA	NA	NA	5.004259	0.642177	NA	NA	NA	NA	44524.6	5198.33	1543622.781	NONE
4	54565831	54567774	esv3600531	NONE	0.087963	0.0353535	0	Absent	NO_DUP_NO_DEL	NA	NA	NA	NA	1.33499	0.356386	1.769267	-0.594686	NA	NA	12041.8	12041.8	291777.528	NONE
4	55069885	55072165	esv3600537	NONE	0	0.0151515	0.00485437	Absent	NO_DUP_NO_DEL	NA	NA	NA	NA	NA	NA	-0.480988	-0.480988	-0.863227	-0.863227	935.87	935.87	NA	NONE
4	55219493	55220351	esv3600539	NONE	0.0972222	0	0	Absent	NO_DUP_NO_DEL	NA	NA	NA	NA	0.424157	0.424157	NA	NA	NA	NA	4890.85	4617.53	108497.935	NONE
4	55930294	55931287	esv3600547	NONE	0.00925926	0	0	Absent	NO_DUP_NO_DEL	NA	NA	NA	NA	0.266425	-1.017406	NA	NA	NA	NA	2010.5	1930.61	NA	NONE
4	56266730	56269021	esv3600549	NONE	0.162037	0	0	Absent	NO_DUP_NO_DEL	NA	NA	NA	NA	1.812647	0.04275	NA	NA	NA	NA	14990.7	9605.58	315543.06	NONE
4	57536971	57538520	esv3600582	NONE	0.0185185	0	0	Absent	NO_DUP_NO_DEL	NA	NA	NA	NA	3.030495	3.002952	NA	NA	NA	NA	5308.69	3375.16	16894.164	NONE
4	57539983	57544713	esv3600583	NONE	0.0740741	0	0	Absent	NO_DUP_NO_DEL	NA	NA	NA	NA	1.227655	1.219163	NA	NA	NA	NA	20074.6	4822.75	102715.893	NONE
4	57719899	57722493	esv3600590	NONE	0	0	0.00970874	Absent	NO_DUP_NO_DEL	NA	NA	NA	NA	NA	NA	NA	NA	0.608999	0.603184	564.972	458.648	NA	NONE
4	57761147	57762110	esv3600594	NONE	0	0.020202	0	Absent	NO_DUP_NO_DEL	NA	NA	NA	NA	NA	NA	1.497724	0.423476	NA	NA	894.46	874.095	398751.5805	NONE
4	58252079	58262333	esv3600601	NONE	0	0.010101	0.0485437	Absent	NO_DUP_NO_DEL	NA	NA	NA	NA	NA	NA	-1.445087	-1.445087	-2.000907	-2.000907	1147.18	1147.18	36300.04	NONE
4	58425952	58435251	esv3600604	NONE	0.106481	0.00505051	0.00970874	Absent	NO_DUP_NO_DEL	NA	NA	NA	NA	4.531181	1.937515	NA	NA	6.074969	4.644715	50669.8	48686.1	2203590.233	NONE
4	58486254	58490694	esv3600606	NONE	0.226852	0	0	Absent	NO_DUP_NO_DEL	NA	NA	NA	NA	0.596704	-0.301594	NA	NA	NA	NA	5265.03	3214.83	218779.015	NONE
4	58884544	58886672	esv3600617	NONE	0.00925926	0	0	Absent	NO_DUP_NO_DEL	NA	NA	NA	NA	2.746736	0.022675	NA	NA	NA	NA	41921.2	4219.57	385210.78	NONE
4	60816340	60817890	esv3600657	NONE	0.300926	0.0505051	0.451456	Ancient	NO_DUP_NO_DEL	NA	NA	NA	NA	0.343348	0.343348	5.339388	5.339388	2.483247	2.483247	41486.7	39144.3	623951.44	NONE
4	61330102	61333188	esv3600669	NONE	0.175926	0.691919	0.631068	Absent	NO_DUP_NO_DEL	NA	NA	NA	NA	0.553223	0.553223	-0.565609	-0.565609	-0.969121	-0.969121	2062.59	2062.59	565721.8	NONE
4	61500241	61502228	esv3600670	NONE	0.12963	0.0959596	0.0242718	Absent	NO_DUP_NO_DEL	NA	NA	NA	NA	1.32179	0.805983	1.039853	0.150698	1.132177	0.622531	39352.1	39352.1	378433.72	NONE
4	61939189	61942243	esv3600678	NONE	0.180556	0.626263	0.223301	Absent	NO_DUP_NO_DEL	NA	NA	NA	NA	-0.117093	-0.117093	0.00303	0.00303	-0.669253	-0.669253	31690.6	31048.1	547173.2	NONE
4	61999387	62001947	esv3600680	NONE	0.296296	0.0151515	0.0776699	Absent	NO_DUP_NO_DEL	NA	NA	NA	NA	1.478682	1.478682	0.033666	-0.59843	2.253618	1.32852	55792.3	39210.6	569969.9091	NONE
4	62028315	62028602	esv3600681	NONE	0.425926	0.287879	0.0970874	Absent	NO_DUP_NO_DEL	NA	NA	NA	NA	4.868906	0.311595	6.204502	0.324431	6.662357	0.685261	53867.2	12430.7	2476713.909	NONE
4	62284131	62285272	esv3600683	NONE	0.0740741	0	0.203883	Absent	NO_DUP_NO_DEL	NA	NA	NA	NA	3.912105	2.030058	NA	NA	7.026593	0.777	18175	13392.1	1017064.277	NONE
4	63301189	63301672	esv3600703	NONE	0.300926	0.20202	0.76699	Ancient	NO_DUP_NO_DEL	NA	NA	NA	NA	1.378578	0.827689	3.269808	2.340656	5.385758	4.231822	27376.6	20643.3	1474813.338	NONE
4	63516136	63517939	esv3600708	NONE	0.00925926	0	0	Absent	NO_DUP_NO_DEL	NA	NA	NA	NA	1.717023	0.259802	NA	NA	NA	NA	5219.56	2224.7	386449.5615	NONE
4	63668999	63676240	esv3600715	NONE	0.0833333	0.181818	0.378641	Absent	NO_DUP_NO_DEL	NA	NA	NA	NA	3.083383	3.083383	2.952121	-0.299068	2.066335	-0.678473	27265.3	16926.4	427843.6035	NONE
4	63670474	63671759	esv3600717	NONE	0.0740741	0.181818	0.378641	Absent	NO_DUP_NO_DEL	NA	NA	NA	NA	3.083383	3.083383	2.952121	-0.299068	2.066335	-0.678473	27265.3	16926.4	390251.344	NONE
4	64133341	64138531	esv3600732	NONE	0.0277778	0.0959596	0.00485437	Absent	DEL_OR_PARTIAL_DEL	NA	NA	NA	NA	-0.830783	-0.830783	0.161722	-0.697697	-2.534297	-2.534297	1656.61	1656.61	376147.52	NONE
4	64694317	64714363	esv3600747	NONE	0	0.333333	0.160194	Absent	NO_DUP_NO_DEL	NA	NA	NA	NA	NA	NA	5.017151	0.667786	3.543482	-2.366342	2493.72	2444.25	538379.5375	NONE
4	65097097	65097834	esv3600755	NONE	0.231481	0.141414	0.169903	Absent	NO_DUP_NO_DEL	NA	NA	NA	NA	0.544095	-1.665005	0.796585	-3.804741	1.031431	-3.127644	65781.6	18271.4	499186.5964	NONE
4	65127049	65128018	esv3600758	NONE	0	0.020202	0	Absent	NO_DUP_NO_DEL	NA	NA	NA	NA	NA	NA	-1.605886	-1.953708	NA	NA	1415.99	1395.53	12452.86	NONE
4	65719067	65719554	esv3600772	NONE	0.0972222	0.237374	0.446602	Absent	NO_DUP_NO_DEL	NA	NA	NA	NA	1.230887	-0.109227	0.348307	-0.28465	1.487753	0.543566	2849.24	2825.49	290003.504	NONE
4	65819700	65841180	esv3600775	NONE	0.00925926	0	0	Absent	NO_DUP_NO_DEL	NA	NA	NA	NA	1.443289	0.970675	NA	NA	NA	NA	2957.62	2439.99	36707.314	NONE
4	66660061	66661172	esv3600801	NONE	0.0138889	0	0	Absent	NO_DUP_NO_DEL	NA	NA	NA	NA	5.539929	1.476868	NA	NA	NA	NA	1795.49	1713.95	NA	NONE
4	68352938	68354013	esv3600850	NONE	0.0324074	0	0	Ancient	NO_DUP_NO_DEL	NA	NA	NA	NA	0.064366	0.064366	NA	NA	NA	NA	39513.8	39513.8	654026.8	NONE
4	70388894	70390232	esv3600913	NONE	0	0	0.0145631	Absent	NO_DUP_NO_DEL	NA	NA	NA	NA	NA	NA	NA	NA	NA	NA	1098.49	786.309	NA	NONE
4	70434807	70436192	esv3600916	NONE	0.0138889	0	0	Absent	NO_DUP_NO_DEL	NA	NA	NA	NA	-1.2114	-1.2114	NA	NA	NA	NA	1221.2	1221.1	NA	NONE
4	70467470	70472805	esv3600917	NONE	0.435185	0.267677	0.184466	Ancient	NO_DUP_NO_DEL	NA	NA	NA	NA	2.944137	2.300553	2.757814	2.296567	3.834852	3.169817	36545.3	36489.6	1440529.68	NONE
4	70973544	70984223	esv3600931	NONE	0.0138889	0	0	Absent	NO_DUP_NO_DEL	NA	NA	NA	NA	11.892942	0.994303	NA	NA	NA	NA	9672.1	1263.12	127815.1	NONE
4	71372427	71373326	esv3600935	NONE	0.0509259	0	0	Ancient	NO_DUP_NO_DEL	NA	NA	NA	NA	1.984223	0.145167	NA	NA	NA	NA	44953.7	4255.16	228262.7511	NONE
4	71372491	71373121	esv3600936	NONE	0.0509259	0	0	Ancient	NO_DUP_NO_DEL	NA	NA	NA	NA	1.984223	0.145167	NA	NA	NA	NA	44953.7	4255.16	228262.7511	NONE
4	71945535	71955945	esv3600945	NONE	0.00925926	0	0	Absent	NO_DUP_NO_DEL	NA	NA	NA	NA	1.691152	1.691152	NA	NA	NA	NA	1746.03	1600.86	21273.483	NONE
4	72517521	72520457	esv3600955	NONE	0	0.010101	0	Absent	NO_DUP_NO_DEL	NA	NA	NA	NA	NA	NA	0.750222	-1.378904	NA	NA	442.982	407.754	4660.425	NONE
4	73420219	73425877	esv3600971	NONE	0.0601852	0	0	Absent	NO_DUP_NO_DEL	NA	NA	NA	NA	1.579101	0.455857	NA	NA	NA	NA	5973.94	3084.87	204888.18	NONE
4	73552204	73561115	esv3600976	NONE	0.101852	0.0454545	0	Absent	NO_DUP_NO_DEL	NA	NA	NA	NA	1.927617	0.014819	5.260796	0.278158	NA	NA	15111.7	2770.98	353052	NONE
4	73729974	73735818	esv3600981	NONE	0.0324074	0	0	Ancient	NO_DUP_NO_DEL	NA	NA	NA	NA	1.922916	-0.051375	NA	NA	NA	NA	31886.1	3128.61	442531.8461	NONE
4	73831245	73831819	esv3600986	NONE	0.550926	0.489899	0.456311	Recurrent	DEL_OR_PARTIAL_DEL	NA	NA	NA	NA	0.867671	0.867671	2.047295	2.047295	1.772577	1.772577	34567.1	34567.1	NA	NONE
4	74942249	74945488	esv3601007	NONE	0	0.010101	0	Absent	DUP	NA	NA	NA	NA	NA	NA	-1.752773	-1.752773	NA	NA	1185.58	1185.58	NA	NONE
4	74942911	74944408	esv3601008	NONE	0	0.010101	0	Absent	NO_DUP_NO_DEL	NA	NA	NA	NA	NA	NA	-1.752773	-1.752773	NA	NA	1185.58	1185.58	NA	NONE
4	75014299	75015249	esv3601009	NONE	0	0.0454545	0	Absent	NO_DUP_NO_DEL	NA	NA	NA	NA	NA	NA	-0.314178	-2.63069	NA	NA	1065.69	981.426	36605.331	NONE
4	75079647	75083402	esv3601011	NONE	0.0416667	0	0	Absent	NO_DUP_NO_DEL	NA	NA	NA	NA	1.680276	1.132294	NA	NA	NA	NA	3260.32	1873.53	493522.208	NONE
4	75203186	75203605	esv3601013	NONE	0.319444	0.106061	0.218447	Absent	NO_DUP_NO_DEL	NA	NA	NA	NA	3.664606	2.334692	4.287009	1.899312	4.607507	0.534799	34716.9	34716.9	2010402.585	NONE
4	76742956	76743790	esv3601037	NONE	0.226852	0	0	Absent	NO_DUP_NO_DEL	NA	NA	NA	NA	0.254436	0.134683	NA	NA	NA	NA	8449.53	3077.78	476488.6933	NONE
4	76743034	76744546	esv3601038	NONE	0.226852	0	0	Absent	NO_DUP_NO_DEL	NA	NA	NA	NA	0.254436	0.134683	NA	NA	NA	NA	8449.53	3077.78	476488.6933	NONE
4	76964716	76972212	esv3601042	NONE	0	0.0151515	0	Absent	NO_DUP_NO_DEL	NA	NA	NA	NA	NA	NA	2.469132	-0.449375	NA	NA	641.238	569.688	49423.206	NONE
4	78267972	78268471	esv3601072	NONE	0.0231481	0	0	Absent	NO_DUP_NO_DEL	NA	NA	NA	NA	NA	NA	NA	NA	NA	NA	10723.4	2728.91	NA	NONE
4	78491879	78497439	esv3601077	NONE	0.0416667	0	0	Absent	NO_DUP_NO_DEL	NA	NA	NA	NA	-1.063612	-1.739587	NA	NA	NA	NA	3220.18	3220.18	80008.194	NONE
4	79298943	79300651	esv3601101	NONE	0.0277778	0	0	Absent	NO_DUP_NO_DEL	NA	NA	NA	NA	0.578405	0.578405	NA	NA	NA	NA	2745.07	2745.07	111535.1067	NONE
4	80360637	80362723	esv3601119	NONE	0.0648148	0.176768	0.398058	Absent	NO_DUP_NO_DEL	NA	NA	NA	NA	0.739072	0.640604	-0.872982	-0.872982	-0.878067	-1.252082	25096.3	20085.8	229592.02	NONE
4	81509003	81509910	esv3601138	NONE	0.087963	0	0	Absent	NO_DUP_NO_DEL	NA	NA	NA	NA	1.130545	-0.605059	NA	NA	NA	NA	7432.62	7432.62	122743.11	NONE
4	81531158	81535890	esv3601139	NONE	0.0185185	0	0	Absent	NO_DUP_NO_DEL	NA	NA	NA	NA	0.311039	0.311039	NA	NA	NA	NA	723.938	723.938	NA	NONE
4	82584651	82585689	esv3601159	NONE	0.0138889	0	0	Absent	NO_DUP_NO_DEL	NA	NA	NA	NA	1.266491	-0.092801	NA	NA	NA	NA	2258.62	2258.62	7321.398	NONE
4	83316411	83317721	esv3601173	NONE	0.0231481	0	0	Absent	NO_DUP_NO_DEL	NA	NA	NA	NA	2.649015	1.483452	NA	NA	NA	NA	30156	8467.82	127891.9028	NONE
4	85125837	85133543	esv3601215	NONE	0.00925926	0	0	Absent	NO_DUP_NO_DEL	NA	NA	NA	NA	3.139829	-0.078044	NA	NA	NA	NA	9058.73	2243.09	126823.9665	NONE
4	86571297	86572908	esv3601245	NONE	0.208333	0	0	Absent	NO_DUP_NO_DEL	NA	NA	NA	NA	1.266174	0.598303	NA	NA	NA	NA	23196.1	7809.98	553845.46	NONE
4	86976375	86979957	esv3601253	NONE	0.138889	0.0757576	0	Absent	NO_DUP_NO_DEL	NA	NA	NA	NA	1.428526	-0.578035	1.011633	-1.291986	NA	NA	22485.9	13737.9	158767.9	NONE
4	88074780	88079211	esv3601264	NONE	0	0.010101	0	Absent	NO_DUP_NO_DEL	NA	NA	NA	NA	NA	NA	2.444185	2.398594	NA	NA	711.822	696.947	NA	NONE
4	90427882	90428681	esv3601321	NONE	0.143519	0.0505051	0.0776699	Absent	NO_DUP_NO_DEL	NA	NA	NA	NA	3.877043	1.349092	6.656094	1.341623	6.418006	2.018678	52215.1	48482.8	3145893.124	NONE
4	90580413	90592228	esv3601325	NONE	0.0277778	0	0	Absent	NO_DUP_NO_DEL	NA	NA	NA	NA	1.119747	0.188457	NA	NA	NA	NA	2047.72	1434.83	77060.886	NONE
4	90885934	90891426	esv3601330	NONE	0.0324074	0	0	Absent	NO_DUP_NO_DEL	NA	NA	NA	NA	1.662569	1.662569	NA	NA	NA	NA	1371.83	1371.83	10038.896	NONE
4	91719260	91719674	esv3601352	NONE	0.00925926	0	0	Absent	NO_DUP_NO_DEL	NA	NA	NA	NA	-0.1316	-0.1316	NA	NA	NA	NA	2901.35	2901.35	61974.22	NONE
4	91802927	91804638	esv3601353	NONE	0	0.010101	0	Absent	NO_DUP_NO_DEL	NA	NA	NA	NA	NA	NA	2.013257	-1.498338	NA	NA	560.371	533.857	8092.9485	NONE
4	91931556	91935838	esv3601356	NONE	0.0231481	0.409091	0.330097	Absent	NO_DUP_NO_DEL	NA	NA	NA	NA	2.329243	0.043731	2.154239	0.082903	2.292967	-0.039297	3510.92	2572.48	744581.1629	NONE
4	91931666	91933538	esv3601357	NONE	0.0231481	0.409091	0.330097	Absent	NO_DUP_NO_DEL	NA	NA	NA	NA	2.329243	0.114051	2.154239	0.838946	2.292967	0.828809	3510.92	2545.6	744581.1629	NONE
4	91933849	91936097	esv3601358	NONE	0.0231481	0.409091	0.330097	Absent	NO_DUP_NO_DEL	NA	NA	NA	NA	2.329243	0.043731	2.154239	0.082903	2.292967	-0.039297	3510.92	2572.48	753885.7988	NONE
4	92073856	92081228	esv3601361	NONE	0	0.010101	0	Absent	NO_DUP_NO_DEL	NA	NA	NA	NA	NA	NA	-2.786994	-2.786994	NA	NA	602.507	587.437	NA	NONE
4	92472835	92478331	esv3601369	NONE	0.0138889	0	0	Absent	NO_DUP_NO_DEL	NA	NA	NA	NA	3.745981	1.525802	NA	NA	NA	NA	34059.3	34059.3	295308.412	NONE
4	92545284	92548184	esv3601371	NONE	0	0.0353535	0.0485437	Absent	DEL_OR_PARTIAL_DEL	NA	NA	NA	NA	NA	NA	1.97894	0.598856	7.068537	1.503204	10214.6	3942.25	224419.5625	NONE
4	92756644	92760623	esv3601376	NONE	0.00925926	0	0	Absent	NO_DUP_NO_DEL	NA	NA	NA	NA	1.724999	1.250007	NA	NA	NA	NA	19784.7	12006.8	457592.8622	NONE
4	93855459	93861498	esv3601419	NONE	0	0.126263	0.276699	Absent	NO_DUP_NO_DEL	NA	NA	NA	NA	NA	NA	-0.954565	-2.285459	-1.782158	-1.782158	2879.73	2787.15	363116.88	NONE
4	93899418	93909979	esv3601423	NONE	0	0	0.00970874	Absent	NO_DUP_NO_DEL	NA	NA	NA	NA	NA	NA	NA	NA	0.807768	-2.857259	786.832	786.832	12257.105	NONE
4	94599894	94601115	esv3601438	NONE	0.0648148	0.030303	0	Absent	NO_DUP_NO_DEL	NA	NA	NA	NA	4.968732	3.74708	6.624168	2.8245	NA	NA	25169.5	20198.5	2821215.977	NONE
4	95637741	95638660	esv3601453	NONE	0.106481	0	0	Absent	NO_DUP_NO_DEL	NA	NA	NA	NA	-0.303848	-0.303848	NA	NA	NA	NA	40746	40746	1644746.6	NONE
4	96528417	96529682	esv3601469	NONE	0.115741	0	0	Absent	NO_DUP_NO_DEL	NA	NA	NA	NA	1.12645	1.12645	NA	NA	NA	NA	12555.3	10401.7	412799.9867	NONE
4	97319259	97325794	esv3601487	NONE	0.0185185	0	0	Absent	NO_DUP_NO_DEL	NA	NA	NA	NA	0.315441	0.315441	NA	NA	NA	NA	1307.79	1307.79	31649.506	NONE
4	97784763	97790265	esv3601502	NONE	0.125	0.020202	0	Absent	NO_DUP_NO_DEL	NA	NA	NA	NA	4.657158	1.225202	6.878223	1.328564	NA	NA	8737.93	4139.77	2292014.514	NONE
4	98989760	98992145	esv3601531	NONE	0.0185185	0	0	Absent	NO_DUP_NO_DEL	NA	NA	NA	NA	0.929472	-0.186451	NA	NA	NA	NA	3280.45	2178.75	377814.9282	NONE
4	99680781	99682889	esv3601544	NONE	0.138889	0	0	Absent	NO_DUP_NO_DEL	NA	NA	NA	NA	0.502583	0.502583	NA	NA	NA	NA	1886.71	1886.71	NA	NONE
4	100918553	100919293	esv3601563	NONE	0	0.010101	0	Absent	NO_DUP_NO_DEL	NA	NA	NA	NA	NA	NA	-1.129943	-1.129943	NA	NA	772.763	772.763	NA	NONE
4	101599658	101601597	esv3601578	NONE	0.208333	0	0	Absent	NO_DUP_NO_DEL	NA	NA	NA	NA	2.020048	0.092901	NA	NA	NA	NA	4987.91	3458	98234.2095	NONE
4	101702366	101703772	esv3601583	NONE	0.00925926	0	0	Absent	NO_DUP_NO_DEL	NA	NA	NA	NA	0.820951	0.244209	NA	NA	NA	NA	630.122	472.74	NA	NONE
4	101960161	101961196	esv3601587	NONE	0.0833333	0.20202	0.0194175	Absent	NO_DUP_NO_DEL	NA	NA	NA	NA	0.146191	0.146191	0.327316	0.327316	1.625311	1.625311	14463.5	2792.95	218003.5667	NONE
4	102081094	102085256	esv3601591	NONE	0.00925926	0	0	Absent	NO_DUP_NO_DEL	NA	NA	NA	NA	0.183563	-0.749027	NA	NA	NA	NA	1152.89	1152.89	NA	NONE
4	103778986	103783711	esv3601622	NONE	0	0.030303	0	Absent	NO_DUP_NO_DEL	NA	NA	NA	NA	NA	NA	0.878797	0.878797	NA	NA	2204.81	2204.81	NA	NONE
4	104201728	104248847	esv3601627	NONE	0.0740741	0	0	Absent	NO_DUP_NO_DEL	NA	NA	NA	NA	1.384356	1.209952	NA	NA	NA	NA	13733.7	8869.19	60459.64167	NONE
4	104211834	104214416	esv3601628	NONE	0.0787037	0	0	Absent	NO_DUP_NO_DEL	NA	NA	NA	NA	1.209952	-0.013091	NA	NA	NA	NA	13733.7	8938.28	35044.142	NONE
4	104894032	104894690	esv3601640	NONE	0.583333	0.590909	0.834951	Absent	NO_DUP_NO_DEL	NA	NA	NA	NA	-0.213616	-0.213616	-0.055388	-0.055388	1.07874	1.07874	37678.6	37678.6	737290.4	NONE
4	105725170	105727482	esv3601655	NONE	0.0185185	0	0	Absent	NO_DUP_NO_DEL	NA	NA	NA	NA	0.96872	0.96872	NA	NA	NA	NA	1650.15	804.405	28288.12	NONE
4	106707329	106717131	esv3601669	NONE	0.0231481	0	0	Absent	NO_DUP_NO_DEL	NA	NA	NA	NA	-0.373364	-0.373364	NA	NA	NA	NA	2775.44	2775.44	110137.09	NONE
4	107056577	107063379	esv3601674	NONE	0.087963	0.29798	0.126214	Ancient	NO_DUP_NO_DEL	NA	NA	NA	NA	2.125584	-0.442811	4.246511	-1.523371	4.544076	-1.267225	52999.4	28026	1058997.485	NONE
4	107405053	107408163	esv3601687	NONE	0.0138889	0	0	Absent	NO_DUP_NO_DEL	NA	NA	NA	NA	1.368193	1.368193	NA	NA	NA	NA	1648.82	1648.82	NA	NONE
4	107437718	107438504	esv3601689	NONE	0.12963	0.328283	0.480583	Absent	NO_DUP_NO_DEL	NA	NA	NA	NA	0.387296	-0.445807	0.480343	0.035888	1.357768	1.357768	16979.5	16979.5	353792.9967	NONE
4	107440225	107442564	esv3601690	NONE	0	0.010101	0	Absent	NO_DUP_NO_DEL	NA	NA	NA	NA	NA	NA	-0.811394	-1.934747	NA	NA	958.949	958.949	5901.07	NONE
4	108476484	108478165	esv3601706	NONE	0.00925926	0	0	Absent	NO_DUP_NO_DEL	NA	NA	NA	NA	2.536192	-0.986369	NA	NA	NA	NA	1501.96	1501.96	NA	NONE
4	109346965	109348775	esv3601720	NONE	0.00925926	0	0	Absent	NO_DUP_NO_DEL	NA	NA	NA	NA	-0.656904	-0.656904	NA	NA	NA	NA	1006.63	1006.63	NA	NONE
4	109721079	109722242	esv3601729	NONE	0.268519	0.373737	0.203883	Absent	NO_DUP_NO_DEL	NA	NA	NA	NA	1.054605	0.760247	2.642435	2.014654	3.090982	1.922038	17263.3	17171.2	406214.9467	NONE
4	111004040	111005060	esv3601754	NONE	0.037037	0	0	Absent	NO_DUP_NO_DEL	NA	NA	NA	NA	1.204358	1.204358	NA	NA	NA	NA	11780.7	10364.8	303650.9397	NONE
4	111157355	111160581	esv3601760	NONE	0	0	0.038835	Absent	NO_DUP_NO_DEL	NA	NA	NA	NA	NA	NA	NA	NA	-0.070431	-0.070431	710.777	710.777	NA	NONE
4	111296380	111301594	esv3601761	NONE	0.0324074	0	0	Absent	NO_DUP_NO_DEL	NA	NA	NA	NA	0.324031	0.16158	NA	NA	NA	NA	4311.54	2255.55	126492.8187	NONE
4	111625895	111626866	esv3601765	NONE	0	0	0.0242718	Absent	NO_DUP_NO_DEL	NA	NA	NA	NA	NA	NA	NA	NA	-0.196812	-0.196812	592.637	592.637	8932.742	NONE
4	112422838	112426234	esv3601781	NONE	0	0	0.00970874	Absent	NO_DUP_NO_DEL	NA	NA	NA	NA	NA	NA	NA	NA	1.584483	1.584483	381.145	381.145	NA	NONE
4	112677118	112681399	esv3601787	NONE	0.0277778	0	0	Absent	NO_DUP_NO_DEL	NA	NA	NA	NA	2.126491	0.692429	NA	NA	NA	NA	1621.72	1621.72	111049.624	NONE
4	113225327	113232187	esv3601799	NONE	0.0185185	0	0	Absent	NO_DUP_NO_DEL	NA	NA	NA	NA	1.923838	1.923838	NA	NA	NA	NA	6374.91	1810.64	NA	NONE
4	114129187	114131077	esv3601806	NONE	0.0231481	0	0	Absent	NO_DUP_NO_DEL	NA	NA	NA	NA	2.025376	2.025376	NA	NA	NA	NA	23857.2	3898.14	52575.27333	NONE
4	114354327	114363261	esv3601811	NONE	0	0.010101	0	Absent	NO_DUP_NO_DEL	NA	NA	NA	NA	NA	NA	-0.495221	-0.495221	NA	NA	229.945	229.945	NA	NONE
4	115928726	115931880	esv3601846	NONE	0.324074	0.323232	0.407767	Absent	NO_DUP_NO_DEL	NA	NA	NA	NA	3.78352	0.05473	5.157631	-1.988183	7.211626	-2.512218	42010.8	42010.8	1317644.042	NONE
4	115980994	115984928	esv3601850	NONE	0.00925926	0	0	Absent	NO_DUP_NO_DEL	NA	NA	NA	NA	0.723821	-0.029299	NA	NA	NA	NA	2985.78	2080.62	NA	NONE
4	116166771	116177284	esv3601853	NONE	0.0787037	0.0656566	0.0533981	Absent	NO_DUP_NO_DEL	NA	NA	NA	NA	-0.116506	-0.410517	1.550582	-0.494127	0.84195	-0.921832	13012.3	4341.04	308789.0225	NONE
4	116266001	116276624	esv3601857	NONE	0.0138889	0	0	Absent	NO_DUP_NO_DEL	NA	NA	NA	NA	2.789615	-0.053913	NA	NA	NA	NA	4740.19	595.948	NA	NONE
4	116311752	116315583	esv3601858	NONE	0.0231481	0	0	Absent	DEL_OR_PARTIAL_DEL	NA	NA	NA	NA	2.614876	0.979327	NA	NA	NA	NA	26159.4	10408.6	697026.2087	NONE
4	117367804	117368498	esv3601890	NONE	0.0925926	0.10101	0.0728155	Absent	NO_DUP_NO_DEL	NA	NA	NA	NA	3.089764	1.780837	7.635249	2.834416	7.981808	3.629483	32978.1	10670.9	342587.364	NONE
4	117499720	117503035	esv3601894	NONE	0	0	0.0145631	Absent	NO_DUP_NO_DEL	NA	NA	NA	NA	NA	NA	NA	NA	0.232792	0.232792	1422.95	1422.95	35865.858	NONE
4	119125417	119130206	esv3601941	NONE	0.194444	0.141414	0.0533981	Absent	NO_DUP_NO_DEL	NA	NA	NA	NA	3.321241	-0.069776	4.587007	0.354627	5.693935	0.121477	45174.7	30135.9	1282474.879	NONE
4	119243799	119247175	esv3601943	NONE	0	0.010101	0	Ancient	NO_DUP_NO_DEL	NA	NA	NA	NA	NA	NA	0.85949	-0.104995	NA	NA	2590.08	2216.27	81010.08689	NONE
4	120027248	120027580	esv3601961	NONE	0.240741	0.272727	0.0194175	Absent	NO_DUP_NO_DEL	NA	NA	NA	NA	3.440947	2.18372	5.6496	4.878475	7.272773	6.100164	52750.3	48265.6	1341044.53	NONE
4	120357609	120361179	esv3601970	NONE	0.0277778	0	0	Absent	NO_DUP_NO_DEL	NA	NA	NA	NA	1.52232	0.690158	NA	NA	NA	NA	3360.13	3315.08	30415.42	NONE
4	120552749	120556387	esv3601974	NONE	0.037037	0	0	Absent	NO_DUP_NO_DEL	NA	NA	NA	NA	1.186778	-0.025481	NA	NA	NA	NA	10668.5	7773.71	139650.2497	NONE
4	120579963	120580881	esv3601975	NONE	0.0277778	0	0	Absent	NO_DUP_NO_DEL	NA	NA	NA	NA	-0.118336	-0.118336	NA	NA	NA	NA	8087.97	8087.97	72520.14	NONE
4	120600198	120606573	esv3601976	NONE	0	0	0.00970874	Absent	NO_DUP_NO_DEL	NA	NA	NA	NA	NA	NA	NA	NA	0.770494	0.770494	442.528	442.528	NA	NONE
4	120865434	120866627	esv3601981	NONE	0.0416667	0.0555556	0.0194175	Absent	NO_DUP_NO_DEL	NA	NA	NA	NA	1.711201	0.795169	5.940004	-0.035768	6.885089	0.198556	2900.87	2358.54	557876.7227	NONE
4	120963604	120965121	esv3601983	NONE	0.0833333	0	0.116505	Absent	NO_DUP_NO_DEL	NA	NA	NA	NA	NA	NA	NA	NA	NA	NA	1310.77	1253.15	204128.96	NONE
4	122208129	122209559	esv3602003	NONE	0.0231481	0	0	Absent	NO_DUP_NO_DEL	NA	NA	NA	NA	1.014343	1.014343	NA	NA	NA	NA	3004.46	2661.83	NA	NONE
4	122282235	122289973	esv3602006	NONE	0.111111	0.0353535	0.174757	Ancient	NO_DUP_NO_DEL	NA	NA	NA	NA	2.469258	2.315322	1.363051	1.122274	3.523953	3.523953	48422.3	26846.9	1015886.667	NONE
4	126900304	126906673	esv3602105	NONE	0.00925926	0	0	Absent	NO_DUP_NO_DEL	NA	NA	NA	NA	2.048581	0.080205	NA	NA	NA	NA	2494.34	2351.1	217152.2724	NONE
4	128156391	128157326	esv3602144	NONE	0.00925926	0	0	Absent	NO_DUP_NO_DEL	NA	NA	NA	NA	1.971184	0.764765	NA	NA	NA	NA	2903.77	2566.14	152391.82	NONE
4	128752712	128753241	esv3602152	NONE	0	0	0.0436893	Absent	NO_DUP_NO_DEL	NA	NA	NA	NA	NA	NA	NA	NA	-1.370996	-2.156958	1123.18	1123.18	NA	NONE
4	130066189	130068435	esv3602178	NONE	0.217593	0.318182	0.412621	Absent	NO_DUP_NO_DEL	NA	NA	NA	NA	2.151714	-0.301715	4.685185	-0.59285	5.56497	-0.384231	31233.7	25534.1	1054649.68	NONE
4	130585151	130587978	esv3602185	NONE	0.0462963	0	0	Absent	NO_DUP_NO_DEL	NA	NA	NA	NA	1.360188	1.07219	NA	NA	NA	NA	13590.6	970.284	172016.466	NONE
4	130626377	130626649	esv3602189	NONE	0.319444	0.373737	0.276699	Ancient	NO_DUP_NO_DEL	NA	NA	NA	NA	1.018039	-0.494001	1.851191	-0.739811	1.189097	-0.508373	3651.44	2593.24	479900.2067	NONE
4	131568268	131570199	esv3602215	NONE	0	0	0.00970874	Absent	NO_DUP_NO_DEL	NA	NA	NA	NA	NA	NA	NA	NA	2.28068	2.28068	722.615	722.615	32869.186	NONE
4	132490410	132493639	esv3602250	NONE	0.185185	0	0	Absent	NO_DUP_NO_DEL	NA	NA	NA	NA	2.467644	1.934417	NA	NA	NA	NA	15886	8331.17	766500.4863	NONE
4	132971385	132973057	esv3602256	NONE	0	0.020202	0	Absent	NO_DUP_NO_DEL	NA	NA	NA	NA	NA	NA	-0.856401	-0.856401	NA	NA	855.332	855.332	NA	NONE
4	133180785	133182979	esv3602260	NONE	0.486111	0.378788	0.383495	Absent	NO_DUP_NO_DEL	NA	NA	NA	NA	0.582962	0.582962	0.183163	0.183163	1.08131	1.08131	3585.85	3585.85	229421.36	NONE
4	133445429	133445697	esv3602264	NONE	0.555556	0.383838	0.563107	Ancient	NO_DUP_NO_DEL	NA	NA	NA	NA	3.260979	0.825933	2.73051	0.337629	3.856121	0.72523	47536.8	40463.6	1289709.4	NONE
4	133865277	133871619	esv3602272	NONE	0.171296	0.00505051	0.0194175	Absent	DEL_OR_PARTIAL_DEL	NA	NA	NA	NA	5.837723	3.598093	13.295233	8.089871	8.286168	4.804688	24223.7	22677.4	3271300.304	NONE
4	135433008	135435698	esv3602310	NONE	0.560185	0.535354	0.980583	Ancient	NO_DUP_NO_DEL	NA	NA	NA	NA	2.163864	1.818934	4.555767	2.76194	7.859989	5.955145	39581.8	25313.6	1345437.567	NONE
4	136508224	136511669	esv3602341	NONE	0.00925926	0	0	Absent	NO_DUP_NO_DEL	NA	NA	NA	NA	2.986489	2.986489	NA	NA	NA	NA	7013.75	2140.21	33235.69667	NONE
4	137207580	137208685	esv3602361	NONE	0	0	0.00970874	Absent	NO_DUP_NO_DEL	NA	NA	NA	NA	NA	NA	NA	NA	-1.037766	-1.037766	793.159	793.159	NA	NONE
4	137359022	137362911	esv3602365	NONE	0.0231481	0	0	Absent	NO_DUP_NO_DEL	NA	NA	NA	NA	0.639128	-0.406041	NA	NA	NA	NA	3010.71	2854.22	27187.853	NONE
4	137359077	137364857	esv3602366	NONE	0.0231481	0	0	Absent	NO_DUP_NO_DEL	NA	NA	NA	NA	0.639128	-0.406041	NA	NA	NA	NA	3010.71	2854.22	27187.853	NONE
4	138324024	138333433	esv3602395	NONE	0.0231481	0	0	Absent	NO_DUP_NO_DEL	NA	NA	NA	NA	-0.454043	-0.454043	NA	NA	NA	NA	1721.14	1721.14	NA	NONE
4	140231279	140238797	esv3602437	NONE	0	0.020202	0.00485437	Absent	NO_DUP_NO_DEL	NA	NA	NA	NA	NA	NA	2.067185	-1.88536	4.582945	-2.165349	45690.9	2621.64	300244.9284	NONE
4	141848838	141849314	esv3602457	NONE	0.0509259	0	0	Absent	NO_DUP_NO_DEL	NA	NA	NA	NA	1.42604	1.42604	NA	NA	NA	NA	3248.96	3248.96	NA	NONE
4	142230774	142233063	esv3602463	NONE	0.523148	0.328283	0.368932	Ancient	NO_DUP_NO_DEL	NA	NA	NA	NA	3.252305	3.229848	5.185586	3.933919	4.714324	3.98866	37120	31920.6	1593080.125	NONE
4	143694966	143696449	esv3602490	NONE	0.0138889	0	0	Absent	NO_DUP_NO_DEL	NA	NA	NA	NA	2.49624	2.49624	NA	NA	NA	NA	2530.69	2530.69	114782.3787	NONE
4	143794236	143801011	esv3602492	NONE	0.0277778	0	0	Absent	NO_DUP_NO_DEL	NA	NA	NA	NA	0.901125	-0.100957	NA	NA	NA	NA	4652.86	4567.26	17264.38	NONE
4	143857919	143858595	esv3602493	NONE	0.111111	0	0	Absent	NO_DUP_NO_DEL	NA	NA	NA	NA	0.904387	0.199638	NA	NA	NA	NA	22010.6	9919.13	268438.5954	NONE
4	144841876	144853560	esv3602524	NONE	0.0601852	0	0	Absent	NO_DUP_NO_DEL	NA	NA	NA	NA	NA	NA	NA	NA	NA	NA	31135.1	5061.85	NA	NONE
4	146438780	146440426	esv3602561	NONE	0.0740741	0.510101	0.116505	Absent	NO_DUP_NO_DEL	NA	NA	NA	NA	0.475963	0.475963	0.499505	-1.132319	2.917711	0.656861	10418.4	10418.4	210337.4933	NONE
4	146901820	146904359	esv3602568	NONE	0.0740741	0	0	Absent	DUP	NA	NA	NA	NA	5.426844	-0.004518	NA	NA	NA	NA	29313	3166.64	467908.8391	NONE
4	146919589	146927732	esv3602571	NONE	0.300926	0.40404	0.0873786	Absent	DEL_OR_PARTIAL_DEL	NA	NA	NA	NA	0.05512	-0.526643	0.134717	-0.607723	1.018266	1.018266	11873.7	8817.96	328566.805	NONE
4	147730166	147731076	esv3602585	NONE	0.0462963	0.030303	0.0776699	Absent	NO_DUP_NO_DEL	NA	NA	NA	NA	7.071036	0.32252	9.617372	0.987035	7.643154	1.60718	35873	31889.7	1109165.394	NONE
4	148133821	148135111	esv3602595	NONE	0	0	0.145631	Absent	NO_DUP_NO_DEL	NA	NA	NA	NA	NA	NA	NA	NA	-1.170233	-1.170233	1251.76	1251.76	70819.84	NONE
4	149099290	149101622	esv3602615	NONE	0	0.0151515	0.00485437	Absent	NO_DUP_NO_DEL	NA	NA	NA	NA	NA	NA	-0.882468	-0.882468	-1.12838	-1.12838	918.577	918.577	36899.94	NONE
4	151754384	151755008	esv3602667	NONE	0.00925926	0	0	Absent	NO_DUP_NO_DEL	NA	NA	NA	NA	0.142634	0.142634	NA	NA	NA	NA	918.806	799.958	NA	NONE
4	152161353	152163154	esv3602678	NONE	0.0231481	0	0	Absent	NO_DUP_NO_DEL	NA	NA	NA	NA	0.934632	0.378708	NA	NA	NA	NA	2349.41	1913.35	93606.94	NONE
4	152252545	152254131	esv3602682	NONE	0.148148	0.111111	0.160194	Absent	NO_DUP_NO_DEL	NA	NA	NA	NA	1.195855	1.195855	0.983978	0.983978	1.022888	1.022888	7865.81	7220.44	307550.88	NONE
4	152778551	152779028	esv3602693	NONE	0.0648148	0.121212	0	Ancient	NO_DUP_NO_DEL	NA	NA	NA	NA	0.521336	0.521336	1.938318	1.938318	NA	NA	19915.6	19187.4	350671.0356	NONE
4	152790167	152794773	esv3602694	NONE	0.0416667	0.0707071	0.00970874	Absent	NO_DUP_NO_DEL	NA	NA	NA	NA	0.175357	0.175357	-0.622438	-1.903656	-0.622829	-1.864878	1916.16	1916.16	246105.58	NONE
4	154396238	154404742	esv3602726	NONE	0	0	0.00970874	Absent	NO_DUP_NO_DEL	NA	NA	NA	NA	NA	NA	NA	NA	3.745017	3.745017	463.182	323.804	NA	NONE
4	154398668	154402707	esv3602727	NONE	0	0	0.00970874	Absent	NO_DUP_NO_DEL	NA	NA	NA	NA	NA	NA	NA	NA	3.745017	3.745017	463.182	323.804	NA	NONE
4	155751518	155758050	esv3602746	NONE	0.00925926	0	0	Absent	NO_DUP_NO_DEL	NA	NA	NA	NA	1.218506	-0.04909	NA	NA	NA	NA	2320.48	1795.79	78139.11	NONE
4	155982149	155983745	esv3602752	NONE	0.00925926	0	0	Absent	NO_DUP_NO_DEL	NA	NA	NA	NA	2.092778	2.092778	NA	NA	NA	NA	2596.33	346.851	349613.2733	NONE
4	156222535	156223187	esv3602757	NONE	0.0462963	0	0	Absent	NO_DUP_NO_DEL	NA	NA	NA	NA	3.489293	1.614931	NA	NA	NA	NA	25899	24108.5	494277.1867	NONE
4	156594162	156598383	esv3602765	NONE	0.0740741	0	0	Absent	NO_DUP_NO_DEL	NA	NA	NA	NA	1.056909	1.056909	NA	NA	NA	NA	15948.6	7702.93	290894.982	NONE
4	156959336	156973990	esv3602769	NONE	0	0.0454545	0.0291262	Ancient	NO_DUP_NO_DEL	NA	NA	NA	NA	NA	NA	-0.31043	-3.511119	1.07458	-1.168437	22534.6	2344.14	111525.7267	NONE
4	157305257	157306930	esv3602780	NONE	0	0.0252525	0	Absent	NO_DUP_NO_DEL	NA	NA	NA	NA	NA	NA	1.902424	-0.718679	NA	NA	35774.7	2605.85	337364.5063	NONE
4	157407209	157412451	esv3602784	NONE	0.0416667	0	0	Absent	NO_DUP_NO_DEL	NA	NA	NA	NA	5.092542	-0.296503	NA	NA	NA	NA	7633.87	2121.55	47801.467	NONE
4	157557312	157557895	esv3602787	NONE	0.00925926	0	0	Absent	NO_DUP_NO_DEL	NA	NA	NA	NA	0.828968	0.454609	NA	NA	NA	NA	33653.9	192.199	125454.3325	NONE
4	158555759	158560461	esv3602814	NONE	0.0648148	0	0	Absent	NO_DUP_NO_DEL	NA	NA	NA	NA	1.851918	0.574665	NA	NA	NA	NA	5884.56	5884.56	475873.377	NONE
4	158728427	158731915	esv3602820	NONE	0.0555556	0	0	Absent	NO_DUP_NO_DEL	NA	NA	NA	NA	1.872032	0.072017	NA	NA	NA	NA	1823.17	1823.17	107743.2048	NONE
4	159799902	159801508	esv3602840	NONE	0.138889	0.0353535	0.0291262	Absent	NO_DUP_NO_DEL	NA	NA	NA	NA	-0.176696	-0.492352	-1.355048	-1.783618	-1.379911	-1.83999	4757.57	3409.85	155530.284	NONE
4	161160113	161166798	esv3602868	NONE	0.00925926	0	0	Absent	NO_DUP_NO_DEL	NA	NA	NA	NA	0.044772	-0.217494	NA	NA	NA	NA	2124.49	2124.49	17241.119	NONE
4	162053240	162053669	esv3602895	NONE	0.291667	0.39899	0.417476	Absent	NO_DUP_NO_DEL	NA	NA	NA	NA	0.989814	0.159823	0.688569	-1.31882	1.132763	-0.184819	41212.8	36005.4	611832.2	NONE
4	162053282	162053551	esv3602896	NONE	0.291667	0.39899	0.417476	Absent	NO_DUP_NO_DEL	NA	NA	NA	NA	0.989814	0.159823	0.688569	-1.31882	1.132763	-0.184819	41212.8	36005.4	611832.2	NONE
4	162274376	162277378	esv3602906	NONE	0	0	0.00970874	Absent	NO_DUP_NO_DEL	NA	NA	NA	NA	NA	NA	NA	NA	3.52389	0.304706	397.952	397.952	31188.206	NONE
4	162449273	162451675	esv3602911	NONE	0.125	0.136364	0.441748	Absent	NO_DUP_NO_DEL	NA	NA	NA	NA	1.118911	1.118911	1.431808	1.431808	-0.615592	-0.667107	17776	16823.5	231120.26	NONE
4	163278351	163281513	esv3602932	NONE	0.0462963	0.0151515	0.0970874	Absent	NO_DUP_NO_DEL	NA	NA	NA	NA	5.659358	4.2678	7.839678	6.28439	7.536072	6.192757	23484	7858.84	2806248.099	NONE
4	163370283	163372697	esv3602937	NONE	0.0185185	0	0	Absent	NO_DUP_NO_DEL	NA	NA	NA	NA	3.294453	1.50503	NA	NA	NA	NA	2822.6	2822.6	84316.24133	NONE
4	163394004	163396424	esv3602938	NONE	0.0925926	0.222222	0.563107	Absent	NO_DUP_NO_DEL	NA	NA	NA	NA	4.334028	4.334028	-0.457864	-0.457864	-0.619171	-1.665995	20544.6	20544.6	226768.57	NONE
4	163933121	163935005	esv3602950	NONE	0.0138889	0	0	Absent	NO_DUP_NO_DEL	NA	NA	NA	NA	1.171222	0.00997	NA	NA	NA	NA	24721.5	1879.14	56418.88	NONE
4	164362950	164364920	esv3602960	NONE	0.00925926	0	0	Absent	NO_DUP_NO_DEL	NA	NA	NA	NA	0.445376	0.445376	NA	NA	NA	NA	615.23	615.23	NA	NONE
4	164613693	164614906	esv3602966	NONE	0.0324074	0.010101	0.0728155	Absent	NO_DUP_NO_DEL	NA	NA	NA	NA	3.655357	-0.635557	5.980929	-1.010258	4.591857	0.470282	21542.9	5463.17	917062.7748	NONE
4	165037562	165040854	esv3602982	NONE	0.00925926	0	0	Absent	NO_DUP_NO_DEL	NA	NA	NA	NA	0.334091	0.334091	NA	NA	NA	NA	10081.5	1383.59	90603.94	NONE
4	165203039	165206223	esv3602988	NONE	0.0324074	0.010101	0.18932	Absent	NO_DUP_NO_DEL	NA	NA	NA	NA	0.29742	0.079268	0.435623	0.435623	-0.825023	-0.825023	1944.14	1404.81	144341.26	NONE
4	165448077	165448693	esv3602995	NONE	0.0231481	0	0	Absent	NO_DUP_NO_DEL	NA	NA	NA	NA	0.704575	-0.391836	NA	NA	NA	NA	1711.54	1306.96	51752.47	NONE
4	165967103	165967663	esv3603014	NONE	0.157407	0	0	Absent	NO_DUP_NO_DEL	NA	NA	NA	NA	NA	NA	NA	NA	NA	NA	8874.1	3467.79	69436.78	NONE
4	166002564	166005042	esv3603015	NONE	0.50463	0.929293	0.912621	Absent	NO_DUP_NO_DEL	NA	NA	NA	NA	0.472676	-0.812309	0.65679	-0.961057	0.657982	-0.967857	61125.3	45916.9	1031467.6	NONE
4	167004317	167004917	esv3603031	NONE	0.0231481	0.429293	0.572816	Absent	NO_DUP_NO_DEL	NA	NA	NA	NA	NA	NA	NA	NA	NA	NA	NA	NA	NA	NONE
4	167669354	167670581	esv3603050	NONE	0.481481	0.207071	0.0194175	Absent	NO_DUP_NO_DEL	NA	NA	NA	NA	3.753082	1.753013	3.621556	3.621556	2.426458	-0.0469	21418.4	14860	361464.8975	NONE
4	167892469	167893612	esv3603057	NONE	0	0.010101	0	Absent	NO_DUP_NO_DEL	NA	NA	NA	NA	NA	NA	0.627734	0.627734	NA	NA	868.277	868.277	NA	NONE
4	168418192	168424049	esv3603068	NONE	0	0	0.0582524	Introgressed	NO_DUP_NO_DEL	NA	NA	NA	NA	NA	NA	NA	NA	0.18961	-0.99663	1445.73	1017.8	158163.9948	NONE
4	169619458	169621230	esv3603105	NONE	0	0	0.0145631	Ancient	NO_DUP_NO_DEL	NA	NA	NA	NA	NA	NA	NA	NA	2.159979	0.874693	26292.4	10115.4	189978.4643	NONE
4	170278462	170278879	esv3603116	NONE	0.231481	0.540404	0.713592	Absent	NO_DUP_NO_DEL	NA	NA	NA	NA	0.267257	-0.272233	0.71267	0.123062	0.186166	-0.520647	38639.9	31914.4	329676.4333	NONE
4	170286869	170288366	esv3603118	NONE	0.162037	0	0	Absent	NO_DUP_NO_DEL	NA	NA	NA	NA	-0.020738	-0.020738	NA	NA	NA	NA	25276.4	25276.4	NA	NONE
4	171070768	171073343	esv3603134	NONE	0.037037	0.10101	0.0242718	Absent	NO_DUP_NO_DEL	NA	NA	NA	NA	3.644638	0.719744	4.267311	-0.505248	6.573832	-0.796845	23001.5	9082.86	918392.4	NONE
4	171267622	171273880	esv3603140	NONE	0.0277778	0.0252525	0	Ancient	NO_DUP_NO_DEL	NA	NA	NA	NA	3.070019	-0.688518	3.054212	-1.06853	NA	NA	43159.1	19820.9	973608.93	NONE
4	171276548	171277692	esv3603141	NONE	0.087963	0.29798	0.771845	Absent	NO_DUP_NO_DEL	NA	NA	NA	NA	0.779327	0.251331	1.764771	-0.54217	5.595324	0.400382	1589.86	1589.86	272262.48	NONE
4	172374434	172379470	esv3603168	NONE	0.282407	0.737374	0.830097	Absent	NO_DUP_NO_DEL	NA	NA	NA	NA	5.839488	2.536429	9.001958	4.905126	10.200771	5.811583	40001.9	25904	2652818.191	NONE
4	172645478	172651295	esv3603174	NONE	0.0462963	0	0	Absent	NO_DUP_NO_DEL	NA	NA	NA	NA	5.227195	3.101592	NA	NA	NA	NA	24228.4	22910.5	1486702.2	NONE
4	172867928	172868693	esv3603182	NONE	0	0	0.0145631	Introgressed	NO_DUP_NO_DEL	NA	NA	NA	NA	NA	NA	NA	NA	5.901423	-0.166652	36611.2	1668.68	578119.5414	NONE
4	172988631	172992933	esv3603188	NONE	0.490741	0.515152	0.203883	Absent	NO_DUP_NO_DEL	NA	NA	NA	NA	1.198004	0.112537	2.696492	-0.355753	2.203587	0.07374	40725.7	36730.1	689609.172	NONE
4	173425034	173433521	esv3603194	NONE	0.606481	0.757576	0.985437	Absent	NO_DUP_NO_DEL	NA	NA	NA	NA	NA	NA	NA	NA	NA	NA	NA	NA	NA	NONE
4	174533076	174535901	esv3603215	NONE	0.101852	0.287879	0.330097	Absent	NO_DUP_NO_DEL	NA	NA	NA	NA	2.907588	2.907588	3.930808	3.930808	5.064817	5.052057	28484.9	20063.5	135013.9	NONE
4	175625167	175626974	esv3603234	NONE	0.087963	0.176768	0.26699	Absent	NO_DUP_NO_DEL	NA	NA	NA	NA	2.907298	2.013586	5.255345	2.175001	6.905359	0.077727	16521.8	2443.84	430278.6507	NONE
4	175885131	175887051	esv3603241	NONE	0.00925926	0	0	Absent	NO_DUP_NO_DEL	NA	NA	NA	NA	2.129677	2.046128	NA	NA	NA	NA	62606.6	3962.07	281634.04	NONE
4	176109753	176111438	esv3603247	NONE	0.0231481	0	0	Absent	NO_DUP_NO_DEL	NA	NA	NA	NA	0.232755	0.064345	NA	NA	NA	NA	5867.46	2779.05	170406.0867	NONE
4	177802707	177803955	esv3603283	NONE	0.0138889	0	0	Absent	NO_DUP_NO_DEL	NA	NA	NA	NA	0.785277	0.785277	NA	NA	NA	NA	2828.47	2583.41	16572.5	NONE
4	177851108	177852256	esv3603286	NONE	0.416667	0	0	Ancient	NO_DUP_NO_DEL	NA	NA	NA	NA	2.774767	2.774767	NA	NA	NA	NA	33475.4	33475.4	NA	NONE
4	178374695	178386699	esv3603305	NONE	0.0231481	0	0	Absent	NO_DUP_NO_DEL	NA	NA	NA	NA	1.235244	1.113702	NA	NA	NA	NA	2873.99	2873.99	68989.94667	NONE
4	179043361	179044026	esv3603322	NONE	0.0277778	0	0	Absent	NO_DUP_NO_DEL	NA	NA	NA	NA	0.419751	0.419751	NA	NA	NA	NA	1064.33	1064.33	NA	NONE
4	179240636	179246436	esv3603325	NONE	0.347222	0	0	Ancient	NO_DUP_NO_DEL	NA	NA	NA	NA	-0.323121	-0.547448	NA	NA	NA	NA	58694.9	8409.58	203077.63	NONE
4	179345674	179347678	esv3603329	NONE	0.0231481	0	0	Absent	NO_DUP_NO_DEL	NA	NA	NA	NA	1.188095	1.188095	NA	NA	NA	NA	2311.43	2311.43	NA	NONE
4	179532767	179534804	esv3603336	NONE	0.0277778	0	0	Absent	NO_DUP_NO_DEL	NA	NA	NA	NA	0.692425	0.266178	NA	NA	NA	NA	4987.77	2635.04	81961.95467	NONE
4	179772397	179773751	esv3603338	NONE	0.0231481	0	0	Absent	NO_DUP_NO_DEL	NA	NA	NA	NA	2.932286	-0.481171	NA	NA	NA	NA	49976.6	3545.14	304534.774	NONE
4	179785422	179786243	esv3603339	NONE	0.0138889	0	0	Absent	NO_DUP_NO_DEL	NA	NA	NA	NA	1.040807	-0.653671	NA	NA	NA	NA	730.103	730.103	9389.487333	NONE
4	179818536	179820691	esv3603340	NONE	0	0	0.0145631	Introgressed	NO_DUP_NO_DEL	NA	NA	NA	NA	NA	NA	NA	NA	12.874735	4.614626	27584.5	4324.71	2481955.653	NONE
4	180063822	180064151	esv3603348	NONE	0.634259	0.287879	0.752427	Ancient	NO_DUP_NO_DEL	NA	NA	NA	NA	5.42339	1.958382	9.05559	3.005152	5.947738	2.475923	55607.1	44381.7	3881954.948	NONE
4	180484984	180486566	esv3603354	NONE	0.00925926	0	0	Absent	NO_DUP_NO_DEL	NA	NA	NA	NA	NA	NA	NA	NA	NA	NA	1194.09	1194.09	17878.546	NONE
4	181755809	181756555	esv3603391	NONE	0.0324074	0	0	Absent	NO_DUP_NO_DEL	NA	NA	NA	NA	3.843063	1.009674	NA	NA	NA	NA	29096.1	12193.9	962776.22	NONE
4	182056564	182057129	esv3603402	NONE	0.175926	0.611111	0.791262	Absent	NO_DUP_NO_DEL	NA	NA	NA	NA	3.275833	3.275833	3.378503	3.199317	4.138061	3.566803	28380.1	7628.15	812286.5644	NONE
4	183467703	183470041	esv3603422	NONE	0.00925926	0	0	Absent	NO_DUP_NO_DEL	NA	NA	NA	NA	0.716867	-0.391534	NA	NA	NA	NA	2468.35	2468.35	10183.488	NONE
4	183570005	183571998	esv3603426	NONE	0	0.0656566	0.169903	Introgressed	NO_DUP_NO_DEL	NA	NA	NA	NA	NA	NA	0.650952	0.650952	1.148914	0.447213	14028	11594.7	490638.645	NONE
4	184008062	184009809	esv3603433	NONE	0	0	0.00970874	Absent	NO_DUP_NO_DEL	NA	NA	NA	NA	NA	NA	NA	NA	-0.132241	-0.132241	801.823	801.823	11384.87	NONE
4	184147510	184151571	esv3603435	NONE	0.0138889	0	0	Absent	NO_DUP_NO_DEL	NA	NA	NA	NA	0.027179	-0.190984	NA	NA	NA	NA	12074.2	11956	NA	NONE
4	184416931	184418063	esv3603440	NONE	0	0.010101	0	Absent	NO_DUP_NO_DEL	NA	NA	NA	NA	NA	NA	1.397618	1.397618	NA	NA	575.066	575.066	NA	NONE
4	184674251	184675720	esv3603447	NONE	0.115741	0.222222	0.179612	Ancient	NO_DUP_NO_DEL	NA	NA	NA	NA	3.531044	2.945694	2.054741	2.054741	2.942767	2.942767	29858.2	26657.8	1771476	NONE
4	185628060	185628577	esv3603466	NONE	0.111111	0	0.00485437	Absent	NO_DUP_NO_DEL	NA	NA	NA	NA	1.04903	0.205114	NA	NA	-0.775305	-0.806093	3248.06	3132.16	53762.478	NONE
4	186397700	186420674	esv3603503	NONE	0	0.0151515	0	Absent	NO_DUP_NO_DEL	NA	NA	NA	NA	NA	NA	0.122934	0.122934	NA	NA	342.628	342.628	NA	NONE
4	186441632	186444075	esv3603505	NONE	0.157407	0.90404	0.786408	Absent	NO_DUP_NO_DEL	NA	NA	NA	NA	1.212145	1.212145	3.869446	1.604542	3.63542	1.092534	25854.5	23144.8	949893.1273	NONE
4	186469310	186471026	esv3603508	NONE	0.0185185	0	0	Absent	NO_DUP_NO_DEL	NA	NA	NA	NA	1.545112	1.545112	NA	NA	NA	NA	3817	2911.99	NA	NONE
4	187213956	187214734	esv3603526	NONE	0.365741	0.151515	0.0291262	Absent	NO_DUP_NO_DEL	NA	NA	NA	NA	1.162356	1.162356	1.66044	1.66044	3.599154	3.599154	43904.6	43904.6	NA	NONE
4	187231097	187234092	esv3603527	NONE	0.0185185	0	0	Absent	NO_DUP_NO_DEL	NA	NA	NA	NA	-0.22576	-0.22576	NA	NA	NA	NA	1152.41	1152.41	NA	NONE
4	187405468	187406047	esv3603533	NONE	0.00925926	0	0	Absent	NO_DUP_NO_DEL	NA	NA	NA	NA	2.409669	2.409669	NA	NA	NA	NA	1680.09	1680.09	NA	NONE
4	187614499	187614855	esv3603540	NONE	0.310185	0.141414	0.247573	Absent	NO_DUP_NO_DEL	NA	NA	NA	NA	-1.055275	-1.055275	-1.281832	-1.281832	-1.905462	-1.905462	14208.4	14208.4	478034.2	NONE
4	187843666	187850398	esv3603546	NONE	0.0601852	0	0	Absent	NO_DUP_NO_DEL	NA	NA	NA	NA	-0.240448	-0.240448	NA	NA	NA	NA	9542.17	9542.17	71035.664	NONE
4	187971147	187972770	esv3603551	NONE	0	0.0606061	0.00485437	Absent	NO_DUP_NO_DEL	NA	NA	NA	NA	NA	NA	2.256327	2.256327	1.870971	1.870971	2733.91	2733.91	91265.44	NONE
4	188041756	188043510	esv3603556	NONE	0	0.0555556	0	Introgressed	DEL_OR_PARTIAL_DEL	NA	NA	NA	NA	NA	NA	1.660606	1.277607	NA	NA	23683.3	6606.21	454156.7211	NONE
4	188345963	188348506	esv3603582	NONE	0	0.010101	0	Absent	NO_DUP_NO_DEL	NA	NA	NA	NA	NA	NA	1.864584	1.864584	NA	NA	796.287	796.287	11689.048	NONE
4	189155582	189156166	esv3603623	NONE	0.0138889	0	0	Absent	NO_DUP_NO_DEL	NA	NA	NA	NA	2.238068	-0.307152	NA	NA	NA	NA	1793.41	1075.69	20260.38	NONE
4	189437071	189438930	esv3603650	NONE	0	0.040404	0.131068	Introgressed	NO_DUP_NO_DEL	NA	NA	NA	NA	NA	NA	4.073621	-0.658379	0.349071	-0.483136	2676.11	2155.27	226245.0633	NONE
4	190058006	190064283	esv3603675	NONE	0.453704	0.712121	0.679612	Absent	DEL_OR_PARTIAL_DEL	NA	NA	NA	NA	1.039828	1.039828	1.165839	1.165839	2.199469	2.199469	40066.3	40066.3	1988672.7	NONE
4	190105408	190106160	esv3603678	NONE	0.833333	0.959596	1	Ancient	NO_DUP_NO_DEL	NA	NA	NA	NA	3.749265	1.457249	4.550522	1.500929	NA	NA	60715	54553.8	2899549.616	NONE
4	190191601	190200466	esv3603681	NONE	0.106481	0.373737	0.23301	Absent	NO_DUP_NO_DEL	NA	NA	NA	NA	0.194254	-0.458337	0.515742	-0.413242	0.376741	-0.55826	3995.6	2018.37	384771.02	NONE
4	190393179	190397932	esv3603688	NONE	0.0787037	0	0	Absent	NO_DUP_NO_DEL	NA	NA	NA	NA	4.475861	1.238103	NA	NA	NA	NA	41639.9	35836.2	1796655.974	NONE
5	18385	23034	esv3603714	NONE	0.087963	0.00505051	0	Absent	DUP	NA	NA	NA	NA	NA	NA	NA	NA	NA	NA	2896.86	2446.28	NA	NONE
5	97750	101082	esv3603730	NONE	0.0185185	0	0	Absent	NO_DUP_NO_DEL	NA	NA	NA	NA	0.797468	0.635759	NA	NA	NA	NA	42542.7	2918.29	NA	NONE
5	674471	675073	esv3603761	NONE	0.0324074	0	0	Recurrent	NO_DUP_NO_DEL	NA	NA	NA	NA	0.842071	0.842071	NA	NA	NA	NA	26686.6	26686.6	NA	NONE
5	1627140	1628837	esv3603816	NONE	0.384259	0.272727	0.106796	Absent	DUP	NA	NA	NA	NA	1.703185	-0.292977	0.389664	-0.687901	2.307596	0.798187	37860.8	26412.9	273177.66	NONE
5	1924587	1925201	esv3603826	NONE	0.87037	0.843434	0.563107	Ancient	NO_DUP_NO_DEL	NA	NA	NA	NA	6.553455	1.797657	8.369194	2.193164	6.794814	2.161204	56675.9	34659.2	2171618	NONE
5	2769422	2769638	esv3603838	NONE	0.611111	0.242424	0.587379	Ancient	NO_DUP_NO_DEL	NA	NA	NA	NA	3.460736	1.332175	6.680869	2.429349	4.938415	1.931922	43657.1	40465.8	2225865.95	NONE
5	2819403	2821257	esv3603841	NONE	0.106481	0	0	Absent	NO_DUP_NO_DEL	NA	NA	NA	NA	0.235101	-0.401612	NA	NA	NA	NA	8435.73	6680.96	408115.708	NONE
5	3241624	3244310	esv3603851	NONE	0.0138889	0	0	Absent	NO_DUP_NO_DEL	NA	NA	NA	NA	2.896167	0.121545	NA	NA	NA	NA	1381.37	887.275	566472.8132	NONE
5	3656961	3660628	esv3603859	NONE	0.0185185	0	0.116505	Ancient	NO_DUP_NO_DEL	NA	NA	NA	NA	0.603971	0.603971	NA	NA	-0.249269	-0.249269	6968.6	6968.6	NA	NONE
5	4463586	4466693	esv3603877	NONE	0.00925926	0	0	Absent	NO_DUP_NO_DEL	NA	NA	NA	NA	NA	NA	NA	NA	NA	NA	573.92	573.92	10010.392	NONE
5	5107852	5109890	esv3603892	NONE	0.0509259	0	0.0631068	Absent	NO_DUP_NO_DEL	NA	NA	NA	NA	-0.099119	-0.099119	NA	NA	0.425149	0.425149	40468	40468	475722.66	NONE
5	5678684	5680907	esv3603903	NONE	0.00925926	0	0	Absent	NO_DUP_NO_DEL	NA	NA	NA	NA	-0.972637	-0.972637	NA	NA	NA	NA	3541.51	3541.51	NA	NONE
5	7917043	7920556	esv3603940	NONE	0.00462963	0.0252525	0.165049	Absent	NO_DUP_NO_DEL	NA	NA	NA	NA	5.512359	0.574672	5.62959	-0.517394	3.079515	2.060606	26061.7	4580.82	530348.35	NONE
5	8234341	8235357	esv3603949	NONE	0.0138889	0	0	Absent	NO_DUP_NO_DEL	NA	NA	NA	NA	1.12287	-0.363093	NA	NA	NA	NA	5859.49	1923.93	124043.752	NONE
5	8236060	8236572	esv3603950	NONE	0.0138889	0	0	Absent	NO_DUP_NO_DEL	NA	NA	NA	NA	1.12287	0.017575	NA	NA	NA	NA	5859.49	1923.93	124043.752	NONE
5	9734900	9735736	esv3603981	NONE	0.12037	0	0	Absent	NO_DUP_NO_DEL	NA	NA	NA	NA	-0.128825	-0.128825	NA	NA	NA	NA	4972.45	2258.05	769755.42	NONE
5	10273288	10275414	esv3603996	NONE	0.388889	0.691919	0.0679612	Absent	DUP	NA	NA	NA	NA	-0.096237	-0.096237	0.637294	0.637294	0.829572	0.829572	20967.4	15147.3	418686.8	NONE
5	10756185	10756522	esv3604006	NONE	0.328704	0.20202	0.223301	Absent	NO_DUP_NO_DEL	NA	NA	NA	NA	0.463546	-0.598198	1.441533	-1.031094	1.015765	-0.70554	40688.5	16409.6	380859.64	NONE
5	11128191	11135508	esv3604012	NONE	0	0	0.00970874	Absent	NO_DUP_NO_DEL	NA	NA	NA	NA	NA	NA	NA	NA	-0.046885	-0.298514	632.431	528.03	9584.61	NONE
5	12427012	12428771	esv3604040	NONE	0.0648148	0.010101	0	Absent	NO_DUP_NO_DEL	NA	NA	NA	NA	0.572024	-0.692702	1.514065	1.514065	NA	NA	33480.9	4455.37	179841.1175	NONE
5	14540779	14541803	esv3604092	NONE	0.106481	0	0	Absent	NO_DUP_NO_DEL	NA	NA	NA	NA	5.142135	5.142135	NA	NA	NA	NA	1651.56	1622.75	34777.295	NONE
5	15227966	15231033	esv3604106	NONE	0.0555556	0	0	Absent	NO_DUP_NO_DEL	NA	NA	NA	NA	1.623425	-0.168129	NA	NA	NA	NA	10327.3	6114.48	51929.05667	NONE
5	15719464	15720949	esv3604115	NONE	0.0462963	0.126263	0.0485437	Absent	NO_DUP_NO_DEL	NA	NA	NA	NA	0.56736	-0.572031	1.004471	-0.281559	0.546684	-0.329856	33626	29046.9	451570.63	NONE
5	16149982	16150892	esv3604125	NONE	0.189815	0.0151515	0.00485437	Absent	NO_DUP_NO_DEL	NA	NA	NA	NA	0.269754	-0.253122	-0.191971	-0.549899	-0.437886	-0.965906	36401.7	36401.7	450160.27	NONE
5	16535723	16536731	esv3604133	NONE	0	0.010101	0	Absent	NO_DUP_NO_DEL	NA	NA	NA	NA	NA	NA	-0.860757	-0.860757	NA	NA	249.521	249.521	9842.91	NONE
5	16869777	16870823	esv3604138	NONE	0.0601852	0.010101	0.0291262	Absent	NO_DUP_NO_DEL	NA	NA	NA	NA	-0.107591	-0.143063	0.124349	-1.536752	-1.185628	-1.323672	8428.25	8428.25	73030.44	NONE
5	16888376	16889023	esv3604140	NONE	0.0416667	0	0	Absent	NO_DUP_NO_DEL	NA	NA	NA	NA	0.775424	-0.355451	NA	NA	NA	NA	14044.4	14044.4	270520.95	NONE
5	16889590	16891470	esv3604141	NONE	0.0509259	0	0	Absent	NO_DUP_NO_DEL	NA	NA	NA	NA	0.12282	0.12282	NA	NA	NA	NA	3747.4	2127.73	334890.85	NONE
5	17342688	17357285	esv3604159	NONE	0	0.010101	0	Absent	NO_DUP_NO_DEL	NA	NA	NA	NA	NA	NA	0.103336	0.103336	NA	NA	1092.9	1092.9	29744.302	NONE
5	18873305	18874845	esv3604244	NONE	0.12963	0.0454545	0.0728155	Absent	NO_DUP_NO_DEL	NA	NA	NA	NA	0.998772	0.188594	4.81879	1.120064	2.10312	1.064896	17308.3	17308.3	402121.7	NONE
5	19078543	19079032	esv3604256	NONE	0.0833333	0.0757576	0.276699	Ancient	NO_DUP_NO_DEL	NA	NA	NA	NA	1.518242	0.11205	-0.381712	-0.381712	0.154429	-0.195114	33027.5	23377.5	623151.48	NONE
5	19220883	19232465	esv3604262	NONE	0.0555556	0	0	Ancient	NO_DUP_NO_DEL	NA	NA	NA	NA	6.118387	5.474204	NA	NA	NA	NA	20125.3	18307.4	1960723.062	NONE
5	19277703	19288083	esv3604265	NONE	0.0231481	0	0	Absent	NO_DUP_NO_DEL	NA	NA	NA	NA	0.761416	0.761416	NA	NA	NA	NA	3038.71	3038.71	NA	NONE
5	19375249	19376393	esv3604268	NONE	0.273148	0.358586	0.0970874	Ancient	NO_DUP_NO_DEL	NA	NA	NA	NA	7.892425	4.758058	9.002413	5.204842	9.740711	6.097861	48438.4	33732.4	3533421.387	NONE
5	20127280	20131100	esv3604284	NONE	0.0277778	0	0	Absent	NO_DUP_NO_DEL	NA	NA	NA	NA	-0.001221	-0.388408	NA	NA	NA	NA	2696.88	2167.37	NA	NONE
5	20419700	20428771	esv3604287	NONE	0.143519	0	0	Absent	NO_DUP_NO_DEL	NA	NA	NA	NA	1.603245	1.603245	NA	NA	NA	NA	8878.29	8185.62	222389.3	NONE
5	20437123	20444353	esv3604288	NONE	0.0231481	0	0	Absent	NO_DUP_NO_DEL	NA	NA	NA	NA	1.674328	0.022405	NA	NA	NA	NA	1740.76	1539.05	74441.6288	NONE
5	20526068	20531792	esv3604289	NONE	0.0138889	0	0	Absent	NO_DUP_NO_DEL	NA	NA	NA	NA	2.576495	2.576495	NA	NA	NA	NA	3684.48	3684.48	52538.92	NONE
5	21375483	21377327	esv3604308	NONE	0.111111	0	0	Absent	NO_DUP_NO_DEL	NA	NA	NA	NA	NA	NA	NA	NA	NA	NA	8084.39	7525.06	NA	NONE
5	21450197	21452448	esv3604311	NONE	0.24537	0.414141	0.470874	Absent	NO_DUP_NO_DEL	NA	NA	NA	NA	0.748669	0.748669	1.10503	1.10503	2.097588	2.097588	19463.8	4172.59	372101.59	NONE
5	21611851	21614775	esv3604319	NONE	0.115741	0.0707071	0.00485437	Absent	NO_DUP_NO_DEL	NA	NA	NA	NA	0.158109	0.158109	-0.824826	-0.824826	-0.863691	-0.863691	2299.42	2299.42	NA	NONE
5	22016039	22018576	esv3604332	NONE	0.0185185	0	0	Absent	NO_DUP_NO_DEL	NA	NA	NA	NA	0.737039	0.014584	NA	NA	NA	NA	3597.9	2186.56	171784.403	NONE
5	22566593	22567372	esv3604352	NONE	0	0	0.00970874	Absent	NO_DUP_NO_DEL	NA	NA	NA	NA	NA	NA	NA	NA	-1.740376	-1.740376	544.375	544.375	745777.4411	NONE
5	23303351	23304809	esv3604371	NONE	0.00925926	0	0	Absent	NO_DUP_NO_DEL	NA	NA	NA	NA	0.791468	0.342709	NA	NA	NA	NA	432.057	350.912	NA	NONE
5	23903003	23905242	esv3604382	NONE	0.375	0.419192	0.300971	Absent	NO_DUP_NO_DEL	NA	NA	NA	NA	NA	NA	NA	NA	NA	NA	42423.8	42423.8	NA	NONE
5	24568428	24577610	esv3604398	NONE	0.00925926	0	0	Absent	NO_DUP_NO_DEL	NA	NA	NA	NA	0.248728	0.248728	NA	NA	NA	NA	1543.36	1543.36	22544.69	NONE
5	25071521	25074481	esv3604411	NONE	0.0185185	0	0	Absent	NO_DUP_NO_DEL	NA	NA	NA	NA	0.203246	0.203246	NA	NA	NA	NA	3008.96	3008.96	43497.02	NONE
5	25821784	25823948	esv3604426	NONE	0.037037	0.020202	0.0145631	Absent	NO_DUP_NO_DEL	NA	NA	NA	NA	3.042897	3.042897	3.120355	3.055117	0.791907	0.305441	5648.07	5552.62	401917.18	NONE
5	25889790	25892385	esv3604431	NONE	0.189815	0	0	Absent	NO_DUP_NO_DEL	NA	NA	NA	NA	0.196406	0.068603	NA	NA	NA	NA	4148.95	3116.58	161962.92	NONE
5	25991182	25994301	esv3604437	NONE	0.0138889	0	0	Absent	NO_DUP_NO_DEL	NA	NA	NA	NA	0.539858	0.539858	NA	NA	NA	NA	4521.04	4521.04	NA	NONE
5	25996893	26002953	esv3604438	NONE	0.0138889	0	0	Absent	NO_DUP_NO_DEL	NA	NA	NA	NA	0.539858	-0.001462	NA	NA	NA	NA	4521.04	4088.68	NA	NONE
5	26026711	26028832	esv3604440	NONE	0.00925926	0	0	Absent	NO_DUP_NO_DEL	NA	NA	NA	NA	2.399429	1.100182	NA	NA	NA	NA	3947.39	3552.72	110883.1115	NONE
5	26796753	26801901	esv3604455	NONE	0.75463	0.333333	0.121359	Absent	NO_DUP_NO_DEL	NA	NA	NA	NA	4.595648	1.383635	5.679863	0.307151	5.574986	-0.541057	50479.1	37745.5	2277942.2	NONE
5	27524869	27526440	esv3604474	NONE	0	0.111111	0	Absent	NO_DUP_NO_DEL	NA	NA	NA	NA	NA	NA	-0.802916	-0.802916	NA	NA	903.604	903.604	39078.9	NONE
5	28245671	28253296	esv3604502	NONE	0.0601852	0	0	Absent	NO_DUP_NO_DEL	NA	NA	NA	NA	0.692779	-0.972911	NA	NA	NA	NA	6284.91	1924.36	137104.55	NONE
5	28490979	28495608	esv3604508	NONE	0	0.010101	0	Absent	NO_DUP_NO_DEL	NA	NA	NA	NA	NA	NA	0.450791	0.450791	NA	NA	689.99	689.99	NA	NONE
5	28537356	28539641	esv3604510	NONE	0.0231481	0	0	Absent	NO_DUP_NO_DEL	NA	NA	NA	NA	0.207676	0.065611	NA	NA	NA	NA	1403.83	1338.48	NA	NONE
5	29530198	29540079	esv3604534	NONE	0	0	0.320388	Ancient	NO_DUP_NO_DEL	NA	NA	NA	NA	NA	NA	NA	NA	1.307171	1.307171	2132.34	1904.25	146236.86	NONE
5	29710003	29712398	esv3604540	NONE	0.00925926	0	0	Absent	NO_DUP_NO_DEL	NA	NA	NA	NA	1.557985	0.942603	NA	NA	NA	NA	15702.6	940.577	1009294.015	NONE
5	30915526	30916063	esv3604567	NONE	0.601852	0.272727	0.199029	Ancient	NO_DUP_NO_DEL	NA	NA	NA	NA	-0.294957	-0.294957	0.670787	0.670787	0.458122	0.458122	32468.4	32468.4	NA	NONE
5	31346906	31348416	esv3604576	NONE	0.0138889	0	0	Absent	NO_DUP_NO_DEL	NA	NA	NA	NA	0.370899	0.370899	NA	NA	NA	NA	2831.84	250.047	13324.64	NONE
5	31391098	31392049	esv3604577	NONE	0.0277778	0	0	Absent	NO_DUP_NO_DEL	NA	NA	NA	NA	2.871709	2.197421	NA	NA	NA	NA	1616.11	1609	27760.852	NONE
5	31572371	31576980	esv3604581	NONE	0.0138889	0	0	Absent	NO_DUP_NO_DEL	NA	NA	NA	NA	-0.244557	-0.789096	NA	NA	NA	NA	1088.19	1088.19	NA	NONE
5	32260088	32261291	esv3604603	NONE	0.00462963	0.00505051	0.0339806	Absent	NO_DUP_NO_DEL	NA	NA	NA	NA	2.574173	-0.431152	2.791166	1.125922	-0.423917	-1.496425	13242.2	4833.45	295961.2158	NONE
5	32526748	32530059	esv3604612	NONE	0.00925926	0	0	Absent	NO_DUP_NO_DEL	NA	NA	NA	NA	0.937666	0.782805	NA	NA	NA	NA	5596.65	3168.31	NA	NONE
5	33111844	33112649	esv3604633	NONE	0.282407	0	0	Absent	NO_DUP_NO_DEL	NA	NA	NA	NA	1.50375	1.471398	NA	NA	NA	NA	22539	21757.1	538011.9389	NONE
5	34074296	34086601	esv3604669	NONE	0.037037	0	0	Absent	NO_DUP_NO_DEL	NA	NA	NA	NA	-0.828255	-0.828255	NA	NA	NA	NA	4883.95	4473.43	NA	NONE
5	36710472	36711063	esv3604725	NONE	0.0138889	0	0	Absent	NO_DUP_NO_DEL	NA	NA	NA	NA	1.006009	1.006009	NA	NA	NA	NA	418.052	418.052	NA	NONE
5	36751406	36752004	esv3604726	NONE	0.0185185	0	0	Ancient	NO_DUP_NO_DEL	NA	NA	NA	NA	2.908078	1.138092	NA	NA	NA	NA	33946.2	3721.32	920601.8354	NONE
5	37972653	37974438	esv3604760	NONE	0.0555556	0	0	Absent	NO_DUP_NO_DEL	NA	NA	NA	NA	3.701137	0.171954	NA	NA	NA	NA	25193.9	18102.1	1373030.577	NONE
5	40794621	40794979	esv3604825	NONE	0.222222	0.444444	0.228155	Absent	NO_DUP_NO_DEL	NA	NA	NA	NA	0.667007	0.30868	2.063793	1.650432	1.769231	0.684929	55206.3	34885.7	556426.2	NONE
5	41226776	41243937	esv3604838	NONE	0	0	0.00970874	Absent	NO_DUP_NO_DEL	NA	NA	NA	NA	NA	NA	NA	NA	-1.725574	-1.725574	871.918	871.918	NA	NONE
5	43085754	43088998	esv3604889	NONE	0.00925926	0	0	Absent	NO_DUP_NO_DEL	NA	NA	NA	NA	5.64974	-0.057118	NA	NA	NA	NA	24219	8235.45	1057116.296	NONE
5	43238362	43243070	esv3604895	NONE	0.0138889	0	0	Absent	NO_DUP_NO_DEL	NA	NA	NA	NA	3.648706	-0.315507	NA	NA	NA	NA	6806.55	3541.12	83235.40587	NONE
5	43479112	43482547	esv3604903	NONE	0	0.0151515	0	Absent	NO_DUP_NO_DEL	NA	NA	NA	NA	NA	NA	-0.954883	-0.954883	NA	NA	930.233	461.517	NA	NONE
5	43783025	43793693	esv3604911	NONE	0	0	0.0194175	Absent	NO_DUP_NO_DEL	NA	NA	NA	NA	NA	NA	NA	NA	NA	NA	926.323	926.323	NA	NONE
5	44344338	44344988	esv3604923	NONE	0.0277778	0	0	Absent	NO_DUP_NO_DEL	NA	NA	NA	NA	0.867317	0.493137	NA	NA	NA	NA	7844.26	1414.85	67413.36	NONE
5	45004817	45014529	esv3604934	NONE	0.0555556	0.161616	0.0679612	Absent	NO_DUP_NO_DEL	NA	NA	NA	NA	-0.298819	-2.203556	0.236882	-5.686811	2.635214	-1.908261	3799.58	3799.58	194588.184	NONE
5	45156625	45159526	esv3604938	NONE	0	0.010101	0	Absent	NO_DUP_NO_DEL	NA	NA	NA	NA	NA	NA	-1.043599	-2.058672	NA	NA	2788.85	2788.85	26500.516	NONE
5	45169246	45170523	esv3604940	NONE	0.0138889	0	0	Absent	NO_DUP_NO_DEL	NA	NA	NA	NA	2.032926	-0.540288	NA	NA	NA	NA	13101.3	2541.44	155418.13	NONE
5	45191875	45213513	esv3604944	NONE	0.00925926	0	0	Absent	NO_DUP_NO_DEL	NA	NA	NA	NA	1.12731	0.50069	NA	NA	NA	NA	1769.27	1435.9	NA	NONE
5	45527000	45527509	esv3604950	NONE	0.263889	0.313131	0.359223	Absent	NO_DUP_NO_DEL	NA	NA	NA	NA	0.090987	-0.696051	0.134674	-0.760421	0.45735	-1.150576	23443	9059.48	357880.572	NONE
5	45949682	45972001	esv3604962	NONE	0.199074	0.00505051	0	Absent	DEL_OR_PARTIAL_DEL	NA	NA	NA	NA	-0.862401	-0.862401	NA	NA	NA	NA	40526.4	27951.6	NA	NONE
5	46081666	46083560	esv3604974	NONE	0.0231481	0	0	Absent	DEL_OR_PARTIAL_DEL	NA	NA	NA	NA	NA	NA	NA	NA	NA	NA	14061.9	14061.9	NA	NONE
5	46144216	46145986	esv3604979	NONE	0.324074	0.388889	0.519417	Absent	DEL_OR_PARTIAL_DEL	NA	NA	NA	NA	NA	NA	NA	NA	NA	NA	58665.6	58665.6	NA	NONE
5	46270626	46275825	esv3604988	NONE	0.24537	0.510101	0.475728	Absent	DEL_OR_PARTIAL_DEL	NA	NA	NA	NA	NA	NA	NA	NA	NA	NA	77180	1511.23	NA	NONE
5	46326188	46331957	esv3604992	NONE	0.0740741	0	0	Absent	DEL_OR_PARTIAL_DEL	NA	NA	NA	NA	NA	NA	NA	NA	NA	NA	8240.7	7233.46	NA	NONE
5	46328173	46329025	esv3604993	NONE	0.0740741	0	0	Absent	DEL_OR_PARTIAL_DEL	NA	NA	NA	NA	NA	NA	NA	NA	NA	NA	8240.7	7233.46	NA	NONE
5	46355369	46360061	esv3604997	NONE	0.0185185	0	0	Absent	DEL_OR_PARTIAL_DEL	NA	NA	NA	NA	NA	NA	NA	NA	NA	NA	782.461	782.461	NA	NONE
5	49480966	49482003	esv3605009	NONE	0.189815	0.106061	0	Absent	DEL_OR_PARTIAL_DEL	NA	NA	NA	NA	NA	NA	NA	NA	NA	NA	39831.6	27350	NA	NONE
5	49501969	49508150	esv3605012	NONE	0.0231481	0	0	Absent	DEL_OR_PARTIAL_DEL	NA	NA	NA	NA	NA	NA	NA	NA	NA	NA	2049.37	1050.58	NA	NONE
5	49511700	49517821	esv3605014	NONE	0.00925926	0	0	Absent	DEL_OR_PARTIAL_DEL	NA	NA	NA	NA	NA	NA	NA	NA	NA	NA	4618.04	3509.85	NA	NONE
5	49543072	49545465	esv3605017	NONE	0.0231481	0	0	Absent	DEL_OR_PARTIAL_DEL	NA	NA	NA	NA	1.867131	-1.037248	NA	NA	NA	NA	2169.41	989.565	NA	NONE
5	50234299	50239425	esv3605035	NONE	0.175926	0.252525	0	Absent	NO_DUP_NO_DEL	NA	NA	NA	NA	0.452288	-0.520306	0.591506	0.147095	NA	NA	25659.7	13987.3	404630.5709	NONE
5	51466655	51471440	esv3605050	NONE	0	0	0.00970874	Absent	NO_DUP_NO_DEL	NA	NA	NA	NA	NA	NA	NA	NA	1.14967	1.14967	1039.29	1039.29	23233.476	NONE
5	51467182	51473418	esv3605052	NONE	0	0	0.00970874	Absent	NO_DUP_NO_DEL	NA	NA	NA	NA	NA	NA	NA	NA	1.14967	1.14967	1039.29	1039.29	23233.476	NONE
5	51577105	51580307	esv3605055	NONE	0.0925926	0	0	Absent	NO_DUP_NO_DEL	NA	NA	NA	NA	1.542946	1.542946	NA	NA	NA	NA	2288.23	1858.89	47926.263	NONE
5	52458941	52459689	esv3605065	NONE	0.652778	0.0707071	0.0631068	Absent	NO_DUP_NO_DEL	NA	NA	NA	NA	4.168986	2.319069	7.495275	1.90378	7.016987	1.142155	37348	32431.6	1594580.366	NONE
5	52688531	52689231	esv3605069	NONE	0.0185185	0	0	Absent	NO_DUP_NO_DEL	NA	NA	NA	NA	5.598985	5.409408	NA	NA	NA	NA	3731.03	3509.46	413041.51	NONE
5	53053525	53059568	esv3605076	NONE	0.00925926	0	0	Absent	NO_DUP_NO_DEL	NA	NA	NA	NA	1.849768	1.581323	NA	NA	NA	NA	5700.91	4123.85	221116.3005	NONE
5	54380343	54386926	esv3605094	NONE	0.00925926	0	0	Absent	NO_DUP_NO_DEL	NA	NA	NA	NA	1.617033	1.617033	NA	NA	NA	NA	902.002	902.002	NA	NONE
5	55429225	55430342	esv3605112	NONE	0.287037	0.560606	0.393204	Absent	DEL_OR_PARTIAL_DEL	NA	NA	NA	NA	1.480359	-0.173616	1.788342	-0.063736	2.095982	-0.488818	30889.3	30108.4	577837.4	NONE
5	57320371	57338133	esv3605146	NONE	0.935185	0.80303	0.796117	Absent	NO_DUP_NO_DEL	NA	NA	NA	NA	1.793366	0.831387	1.936088	0.798464	1.783632	0.732891	49261.6	49261.6	1075663.503	NONE
5	57323407	57333752	esv3605147	NONE	0.935185	0.80303	0.796117	Absent	NO_DUP_NO_DEL	NA	NA	NA	NA	3.057936	3.057936	-0.599108	-0.599108	-0.185396	-0.185396	50985.3	50985.3	516581.8	NONE
5	57955849	57959504	esv3605161	NONE	0.143519	0	0	Absent	NO_DUP_NO_DEL	NA	NA	NA	NA	1.127784	-0.081971	NA	NA	NA	NA	12504.6	10386.4	437586.8	NONE
5	59489237	59496756	esv3605184	NONE	0	0.0454545	0	Absent	NO_DUP_NO_DEL	NA	NA	NA	NA	NA	NA	-1.343242	-1.343242	NA	NA	849.685	849.685	NA	NONE
5	59947776	59951849	esv3605192	NONE	0.185185	0.0151515	0.179612	Absent	NO_DUP_NO_DEL	NA	NA	NA	NA	-0.406121	-0.681308	-0.633111	-0.633111	0.172343	0.172343	7097.83	3576.52	275027.4275	NONE
5	59949561	59951859	esv3605193	NONE	0.185185	0.0151515	0.179612	Absent	NO_DUP_NO_DEL	NA	NA	NA	NA	-0.406121	-0.681308	-0.633111	-0.633111	0.172343	0.172343	7097.83	3576.52	275027.4275	NONE
5	60400893	60404508	esv3605207	NONE	0.101852	0	0	Absent	NO_DUP_NO_DEL	NA	NA	NA	NA	1.12965	0.636285	NA	NA	NA	NA	13503.5	5131.63	130566.079	NONE
5	61747960	61749376	esv3605239	NONE	0.106481	0	0	Absent	NO_DUP_NO_DEL	NA	NA	NA	NA	0.638428	0.638428	NA	NA	NA	NA	3360.97	3317.2	28773.836	NONE
5	62470450	62473339	esv3605252	NONE	0.0231481	0	0	Absent	NO_DUP_NO_DEL	NA	NA	NA	NA	2.630433	-0.096054	NA	NA	NA	NA	1897.72	1838.09	360574.2	NONE
5	62687444	62687711	esv3605259	NONE	0.402778	0.641414	0.868932	Absent	NO_DUP_NO_DEL	NA	NA	NA	NA	-0.483261	-0.493612	-0.760474	-0.760474	-0.595002	-0.869576	69990.9	69990.9	822786.16	NONE
5	63698343	63701359	esv3605279	NONE	0.0509259	0.131313	0	Absent	NO_DUP_NO_DEL	NA	NA	NA	NA	1.994918	0.144734	1.092798	-0.120091	NA	NA	21404.2	8518.89	475850.3283	NONE
5	65028069	65030371	esv3605303	NONE	0.273148	0.272727	0.0970874	Ancient	NO_DUP_NO_DEL	NA	NA	NA	NA	5.839289	1.268315	9.083987	2.757811	9.792196	1.291508	44341.2	39620.2	1840837.027	NONE
5	65268125	65270080	esv3605307	NONE	0.0601852	0	0	Absent	NO_DUP_NO_DEL	NA	NA	NA	NA	2.660841	0.592073	NA	NA	NA	NA	42787.5	17297.3	357624.4467	NONE
5	65443658	65444197	esv3605309	NONE	0	0.010101	0	Absent	NO_DUP_NO_DEL	NA	NA	NA	NA	NA	NA	4.497394	4.497394	NA	NA	992.366	963.237	8671.761	NONE
5	67497321	67498199	esv3605359	NONE	0.0601852	0	0	Absent	NO_DUP_NO_DEL	NA	NA	NA	NA	2.609657	0.205745	NA	NA	NA	NA	24725.6	11062.7	612140.9622	NONE
5	68319221	68320880	esv3605376	NONE	0	0.010101	0	Absent	NO_DUP_NO_DEL	NA	NA	NA	NA	NA	NA	0.835242	0.835242	NA	NA	379.395	379.395	NA	NONE
5	71173056	71173691	esv3605397	NONE	0.0324074	0	0	Absent	NO_DUP_NO_DEL	NA	NA	NA	NA	NA	NA	NA	NA	NA	NA	2224.88	2224.88	NA	NONE
5	73063019	73064890	esv3605419	NONE	0.0138889	0	0	Absent	NO_DUP_NO_DEL	NA	NA	NA	NA	2.782377	1.233032	NA	NA	NA	NA	42937.2	1857.45	437656.7972	NONE
5	75054981	75055433	esv3605450	NONE	0	0	0.0242718	Introgressed	NO_DUP_NO_DEL	NA	NA	NA	NA	NA	NA	NA	NA	1.188247	-1.28048	6045.73	2074.8	317019.883	NONE
5	75265545	75270466	esv3605453	NONE	0.00925926	0	0	Absent	NO_DUP_NO_DEL	NA	NA	NA	NA	0.69507	-0.633207	NA	NA	NA	NA	1802.47	1280.79	9924.11	NONE
5	76317789	76323069	esv3605478	NONE	0	0.010101	0	Absent	NO_DUP_NO_DEL	NA	NA	NA	NA	NA	NA	-0.851549	-0.851549	NA	NA	381.018	381.018	14616.882	NONE
5	77002878	77003684	esv3605494	NONE	0	0	0.0291262	Absent	NO_DUP_NO_DEL	NA	NA	NA	NA	NA	NA	NA	NA	-0.894766	-0.894766	591.603	591.603	40804.484	NONE
5	79652757	79659329	esv3605568	NONE	0.00925926	0	0	Absent	NO_DUP_NO_DEL	NA	NA	NA	NA	2.030463	2.030463	NA	NA	NA	NA	16028	2594.53	225109.5	NONE
5	80685482	80686462	esv3605593	NONE	0.0231481	0	0.0194175	Absent	NO_DUP_NO_DEL	NA	NA	NA	NA	0.741062	0.741062	NA	NA	1.524205	1.524205	2641.62	2641.62	89611.9	NONE
5	82063423	82066162	esv3605622	NONE	0.166667	0.176768	0.00970874	Absent	NO_DUP_NO_DEL	NA	NA	NA	NA	0.646593	0.646593	-0.072971	-0.574414	-0.884187	-0.884187	6131.62	6131.62	169137.64	NONE
5	82421930	82429071	esv3605630	NONE	0	0	0.0631068	Absent	NO_DUP_NO_DEL	NA	NA	NA	NA	NA	NA	NA	NA	0.163841	0.163841	1122.74	1122.74	14053.284	NONE
5	83049467	83054977	esv3605640	NONE	0.037037	0	0	Absent	NO_DUP_NO_DEL	NA	NA	NA	NA	3.900237	2.633897	NA	NA	NA	NA	24710.5	9827.19	808885.707	NONE
5	83589263	83590020	esv3605646	NONE	0.0138889	0	0	Absent	NO_DUP_NO_DEL	NA	NA	NA	NA	1.468335	0.665102	NA	NA	NA	NA	28750.6	9484.16	336099.148	NONE
5	84359997	84362221	esv3605667	NONE	0.00925926	0	0	Absent	NO_DUP_NO_DEL	NA	NA	NA	NA	2.939786	-0.021496	NA	NA	NA	NA	4746.24	3318.39	NA	NONE
5	85296199	85296968	esv3605699	NONE	0.0138889	0	0	Absent	NO_DUP_NO_DEL	NA	NA	NA	NA	3.396158	-0.541249	NA	NA	NA	NA	4282.6	4282.6	143858.89	NONE
5	85559853	85564852	esv3605704	NONE	0	0.0757576	0.0145631	Absent	NO_DUP_NO_DEL	NA	NA	NA	NA	NA	NA	1.681783	-1.201185	1.782959	-1.170082	3102.45	2285.63	172515.7	NONE
5	85878177	85878771	esv3605710	NONE	0.00925926	0	0	Ancient	NO_DUP_NO_DEL	NA	NA	NA	NA	2.018019	-0.343668	NA	NA	NA	NA	41284.8	37554.6	1088271.8	NONE
5	86115330	86117863	esv3605713	NONE	0.138889	0.19697	0.276699	Absent	NO_DUP_NO_DEL	NA	NA	NA	NA	0.57674	-0.59439	2.000912	-1.11957	0.277511	-1.27102	17267.6	15044	366331.63	NONE
5	86246008	86247146	esv3605716	NONE	0.138889	0.10101	0.00485437	Absent	NO_DUP_NO_DEL	NA	NA	NA	NA	NA	NA	NA	NA	NA	NA	NA	NA	NA	NONE
5	87112044	87113154	esv3605728	NONE	0.138889	0	0	Absent	NO_DUP_NO_DEL	NA	NA	NA	NA	2.341732	1.425785	NA	NA	NA	NA	3260.23	2577.91	278878.236	NONE
5	89003715	89004039	esv3605750	NONE	0.203704	0	0	Absent	NO_DUP_NO_DEL	NA	NA	NA	NA	1.254829	-0.431204	NA	NA	NA	NA	15031.5	12557.4	246533.455	NONE
5	90499767	90502128	esv3605774	NONE	0.527778	0.929293	0.776699	Absent	NO_DUP_NO_DEL	NA	NA	NA	NA	NA	NA	NA	NA	NA	NA	36679.2	36679.2	NA	NONE
5	90624257	90626177	esv3605778	NONE	0.037037	0	0	Absent	NO_DUP_NO_DEL	NA	NA	NA	NA	2.059666	2.059666	NA	NA	NA	NA	3943.67	2863.97	340573.62	NONE
5	97035240	97035573	esv3605889	NONE	0	0.040404	0	Absent	NO_DUP_NO_DEL	NA	NA	NA	NA	NA	NA	-0.825893	-0.825893	NA	NA	826.483	736.995	31207.96	NONE
5	97119779	97120559	esv3605897	NONE	0.087963	0.0252525	0	Ancient	NO_DUP_NO_DEL	NA	NA	NA	NA	6.351719	0.692694	10.548766	-0.618404	NA	NA	39831.6	32246	2705823.726	NONE
5	97401558	97402759	esv3605905	NONE	0.439815	0.343434	0.291262	Absent	NO_DUP_NO_DEL	NA	NA	NA	NA	-0.901656	-0.901656	-1.443021	-1.443021	-1.321555	-1.321555	27826.4	27826.4	593888.4	NONE
5	98477515	98478343	esv3605929	NONE	0.106481	0	0	Absent	NO_DUP_NO_DEL	NA	NA	NA	NA	0.507381	0.507381	NA	NA	NA	NA	18816.2	5006.19	506191.5367	NONE
5	98714296	98715322	esv3605937	NONE	0.0138889	0	0	Absent	NO_DUP_NO_DEL	NA	NA	NA	NA	0.665826	-0.763008	NA	NA	NA	NA	3016.31	2986.36	28883.32067	NONE
5	98839884	98842906	esv3605943	NONE	0.407407	0.424242	0.252427	Absent	NO_DUP_NO_DEL	NA	NA	NA	NA	NA	NA	NA	NA	NA	NA	72045.5	48081.3	663874.225	NONE
5	99400886	99401903	esv3605961	NONE	0.273148	0.282828	0.0533981	Absent	NO_DUP_NO_DEL	NA	NA	NA	NA	0.836052	-0.695737	2.436156	-1.466043	1.70901	-1.092862	22777.6	17229.3	370803.37	NONE
5	99513842	99520371	esv3605967	NONE	0.0416667	0	0	Absent	NO_DUP_NO_DEL	NA	NA	NA	NA	1.383083	1.383083	NA	NA	NA	NA	11395.6	1624.33	219612.19	NONE
5	101277989	101279141	esv3606030	NONE	0	0.010101	0	Ancient	NO_DUP_NO_DEL	NA	NA	NA	NA	NA	NA	2.174412	-0.543842	NA	NA	2755.36	2152.94	162795.4558	NONE
5	101693791	101694719	esv3606046	NONE	0.648148	0.590909	0.514563	Absent	NO_DUP_NO_DEL	NA	NA	NA	NA	3.054782	0.102998	3.921003	-0.032887	5.326732	0.405877	82330.5	56267.5	1324362.995	NONE
5	103761344	103766660	esv3606114	NONE	0	0	0.00970874	Absent	NO_DUP_NO_DEL	NA	NA	NA	NA	NA	NA	NA	NA	-1.125098	-1.125098	450.847	450.847	NA	NONE
5	103763992	103765802	esv3606115	NONE	0	0	0.00970874	Absent	NO_DUP_NO_DEL	NA	NA	NA	NA	NA	NA	NA	NA	-1.125098	-1.125098	450.847	450.847	NA	NONE
5	104270042	104270554	esv3606132	NONE	0.0138889	0	0	Absent	NO_DUP_NO_DEL	NA	NA	NA	NA	0.063409	0.063409	NA	NA	NA	NA	940.942	940.942	NA	NONE
5	104687645	104694191	esv3606148	NONE	0.00925926	0	0	Absent	NO_DUP_NO_DEL	NA	NA	NA	NA	1.377584	1.377584	NA	NA	NA	NA	24118.5	634.714	281638	NONE
5	104848924	104855015	esv3606154	NONE	0.134259	0	0	Absent	DEL_OR_PARTIAL_DEL	NA	NA	NA	NA	4.838699	1.873456	NA	NA	NA	NA	28372.2	4643.84	2444390.712	NONE
5	105003728	105007702	esv3606157	NONE	0.0138889	0	0	Absent	NO_DUP_NO_DEL	NA	NA	NA	NA	4.728063	-0.804381	NA	NA	NA	NA	1903.78	1358.14	42764.73	NONE
5	105894401	105895507	esv3606174	NONE	0.236111	0.00505051	0.0873786	Absent	NO_DUP_NO_DEL	NA	NA	NA	NA	NA	NA	NA	NA	NA	NA	NA	NA	NA	NONE
5	106236884	106239672	esv3606184	NONE	0.115741	0.454545	0.524272	Absent	NO_DUP_NO_DEL	NA	NA	NA	NA	2.035426	0.313832	2.837357	-0.006375	3.132974	0.130255	44789.5	32585.6	1380090.46	NONE
5	106396217	106396759	esv3606188	NONE	0.0185185	0	0	Absent	NO_DUP_NO_DEL	NA	NA	NA	NA	0.481193	0.107642	NA	NA	NA	NA	17168.8	5507.56	107322.0785	NONE
5	106970171	106970553	esv3606198	NONE	0.0138889	0.171717	0.121359	Absent	NO_DUP_NO_DEL	NA	NA	NA	NA	0.606133	-0.238458	0.052581	-0.532378	-0.80855	-0.957558	50699.3	14291.3	128907.905	NONE
5	108617634	108619567	esv3606218	NONE	0.0138889	0	0	Absent	NO_DUP_NO_DEL	NA	NA	NA	NA	0.439531	0.439531	NA	NA	NA	NA	3004.04	3004.04	13174.952	NONE
5	109460051	109475361	esv3606237	NONE	0.333333	0	0	Absent	NO_DUP_NO_DEL	NA	NA	NA	NA	1.868002	-0.114782	NA	NA	NA	NA	26582.6	21473.7	537342.0107	NONE
5	109460337	109469247	esv3606238	NONE	0.337963	0	0	Absent	NO_DUP_NO_DEL	NA	NA	NA	NA	1.868002	-0.114782	NA	NA	NA	NA	26582.6	21473.7	537342.0107	NONE
5	109460809	109465425	esv3606239	NONE	0.337963	0.010101	0	Absent	NO_DUP_NO_DEL	NA	NA	NA	NA	1.868002	-0.114782	NA	NA	NA	NA	26582.6	21473.7	590110.2327	NONE
5	110903828	110913774	esv3606276	NONE	0.037037	0	0	Absent	NO_DUP_NO_DEL	NA	NA	NA	NA	1.35052	0.189522	NA	NA	NA	NA	6427.6	6427.6	1069280.87	NONE
5	111939579	111944418	esv3606298	NONE	0	0.0454545	0	Ancient	NO_DUP_NO_DEL	NA	NA	NA	NA	NA	NA	6.764163	2.948235	NA	NA	2682.79	2145.68	2460021.106	NONE
5	112224227	112226886	esv3606302	NONE	0.125	0	0.160194	Absent	NO_DUP_NO_DEL	NA	NA	NA	NA	1.823851	0.37958	NA	NA	3.681945	2.952941	35630.2	3750	563042.6863	NONE
5	112666834	112672322	esv3606314	NONE	0.0601852	0	0	Absent	NO_DUP_NO_DEL	NA	NA	NA	NA	NA	NA	NA	NA	NA	NA	2525.65	2525.65	27522.922	NONE
5	113566254	113568863	esv3606335	NONE	0.12037	0	0	Absent	NO_DUP_NO_DEL	NA	NA	NA	NA	1.111973	-0.009961	NA	NA	NA	NA	24803.8	22615.9	168489.328	NONE
5	114012252	114017715	esv3606347	NONE	0	0.020202	0	Absent	NO_DUP_NO_DEL	NA	NA	NA	NA	NA	NA	0.370584	0.370584	NA	NA	495.367	495.367	NA	NONE
5	114254919	114261436	esv3606355	NONE	0.305556	0.0606061	0	Ancient	NO_DUP_NO_DEL	NA	NA	NA	NA	0.888068	0.428627	3.067811	1.200913	NA	NA	64847.6	57618.3	1316171.67	NONE
5	114325322	114334961	esv3606356	NONE	0.134259	0.176768	0.31068	Absent	DEL_OR_PARTIAL_DEL	NA	NA	NA	NA	0.091937	-1.818443	-0.516001	-3.659802	-0.787581	-3.842876	21705.3	4405.39	365131.235	NONE
5	114880849	114882690	esv3606371	NONE	0	0.010101	0	Absent	NO_DUP_NO_DEL	NA	NA	NA	NA	NA	NA	NA	NA	NA	NA	NA	NA	NA	NONE
5	114969401	114969875	esv3606372	NONE	0.240741	0.419192	0.398058	Absent	NO_DUP_NO_DEL	NA	NA	NA	NA	-0.123184	-0.971145	3.800408	-2.580733	2.771535	-2.547051	6897.89	5406.69	307099.1	NONE
5	115455189	115456934	esv3606381	NONE	0.00925926	0	0	Absent	NO_DUP_NO_DEL	NA	NA	NA	NA	0.134952	0.134952	NA	NA	NA	NA	845.059	836.739	NA	NONE
5	116185734	116188338	esv3606412	NONE	0.00925926	0	0	Absent	NO_DUP_NO_DEL	NA	NA	NA	NA	1.789028	0.33689	NA	NA	NA	NA	21247	1539.09	161467.6	NONE
5	116382561	116387965	esv3606416	NONE	0	0	0.0145631	Absent	NO_DUP_NO_DEL	NA	NA	NA	NA	NA	NA	NA	NA	0.804024	0.804024	585.584	585.584	NA	NONE
5	117387107	117393891	esv3606441	NONE	0.199074	0.0505051	0	Absent	NO_DUP_NO_DEL	NA	NA	NA	NA	0.570037	-0.449358	1.546574	-0.140967	NA	NA	44196.4	14127.1	200661.7667	NONE
5	117708290	117708885	esv3606448	NONE	0.00925926	0	0	Absent	NO_DUP_NO_DEL	NA	NA	NA	NA	1.52118	-0.222689	NA	NA	NA	NA	4636	4636	NA	NONE
5	117868219	117868529	esv3606464	NONE	0.106481	0.212121	0.0145631	Absent	NO_DUP_NO_DEL	NA	NA	NA	NA	4.951827	1.838666	8.090939	2.209821	11.153465	2.914828	22863.6	18930.7	2653755.162	NONE
5	119038077	119041694	esv3606496	NONE	0.236111	0.020202	0	Absent	NO_DUP_NO_DEL	NA	NA	NA	NA	0.337058	0.337058	0.429836	-0.331	NA	NA	40539.9	18832.3	393870.505	NONE
5	119380174	119382671	esv3606505	NONE	0.703704	0.469697	0.781553	Ancient	NO_DUP_NO_DEL	NA	NA	NA	NA	6.622794	5.206605	10.301123	5.311024	11.216593	6.484298	61954.2	50585.6	2943965.4	NONE
5	119910221	119910853	esv3606526	NONE	0.277778	0	0.00485437	Absent	NO_DUP_NO_DEL	NA	NA	NA	NA	1.189839	-0.575427	NA	NA	NA	NA	2675.44	2675.44	66579.842	NONE
5	121012933	121015462	esv3606575	NONE	0.00462963	0.00505051	0	Absent	NO_DUP_NO_DEL	NA	NA	NA	NA	-0.069512	-0.069512	-0.404819	-0.404819	NA	NA	400.574	400.574	NA	NONE
5	121059232	121060007	esv3606576	NONE	0.898148	0.964646	0.839806	Ancient	NO_DUP_NO_DEL	NA	NA	NA	NA	1.105866	1.105866	0.816297	0.082802	0.870942	0.574439	54205.7	50115.3	855748.6	NONE
5	121132606	121135962	esv3606580	NONE	0	0.040404	0.00485437	Absent	DUP	NA	NA	NA	NA	NA	NA	-1.166149	-1.166149	-2.311253	-2.311253	723.517	723.517	43541.68	NONE
5	121426751	121427499	esv3606586	NONE	0	0	0.0339806	Absent	NO_DUP_NO_DEL	NA	NA	NA	NA	NA	NA	NA	NA	5.058937	5.058937	644.57	644.57	NA	NONE
5	122808485	122822021	esv3606608	NONE	0.00925926	0	0	Absent	NO_DUP_NO_DEL	NA	NA	NA	NA	-1.022058	-1.022058	NA	NA	NA	NA	1037.13	1037.13	6248.158	NONE
5	123062434	123064376	esv3606619	NONE	0.0462963	0	0.00485437	Absent	NO_DUP_NO_DEL	NA	NA	NA	NA	0.560471	0.438652	NA	NA	0.910106	0.489156	28292.2	16360.5	758574.58	NONE
5	126081862	126083542	esv3606690	NONE	0.0277778	0.00505051	0	Absent	NO_DUP_NO_DEL	NA	NA	NA	NA	2.274923	1.145705	0.844521	0.844521	NA	NA	1759.73	1602.82	NA	NONE
5	126125986	126127676	esv3606691	NONE	0.0231481	0	0	Absent	NO_DUP_NO_DEL	NA	NA	NA	NA	1.198216	-0.042788	NA	NA	NA	NA	2868.02	2868.02	NA	NONE
5	126458368	126458811	esv3606702	NONE	0.407407	0.474747	0.660194	Absent	NO_DUP_NO_DEL	NA	NA	NA	NA	1.060186	0.243291	3.922497	-0.333863	3.413069	-0.590636	73450.8	3651.64	395354.44	NONE
5	127172319	127173286	esv3606712	NONE	0.597222	0.661616	0.524272	Absent	NO_DUP_NO_DEL	NA	NA	NA	NA	1.983406	-0.272993	5.66312	1.115762	7.528554	3.094319	56309.6	50223.8	647100.51	NONE
5	127172367	127172679	esv3606713	NONE	0.597222	0.661616	0.519417	Absent	NO_DUP_NO_DEL	NA	NA	NA	NA	1.670838	-0.272993	4.493605	1.115762	5.750109	3.094319	56309.6	50223.8	587439.74	NONE
5	128881290	128884086	esv3606758	NONE	0.101852	0	0	Absent	NO_DUP_NO_DEL	NA	NA	NA	NA	0.910133	-0.736517	NA	NA	NA	NA	48036.1	7241.49	140823.228	NONE
5	129613870	129618220	esv3606776	NONE	0.0601852	0	0	Absent	NO_DUP_NO_DEL	NA	NA	NA	NA	0.956532	0.956532	NA	NA	NA	NA	2325.05	2325.05	NA	NONE
5	132379885	132382587	esv3606814	NONE	0	0	0.00970874	Absent	NO_DUP_NO_DEL	NA	NA	NA	NA	NA	NA	NA	NA	0.835885	0.835885	717.228	568.033	NA	NONE
5	132874864	132875627	esv3606820	NONE	0.00925926	0	0	Ancient	NO_DUP_NO_DEL	NA	NA	NA	NA	3.750135	0.347293	NA	NA	NA	NA	18492.5	4928.68	392588	NONE
5	133237709	133239115	esv3606837	NONE	0.0555556	0	0	Absent	NO_DUP_NO_DEL	NA	NA	NA	NA	0.233551	-0.01165	NA	NA	NA	NA	1729.37	1729.37	63630.308	NONE
5	133395411	133398687	esv3606839	NONE	0	0.010101	0	Absent	NO_DUP_NO_DEL	NA	NA	NA	NA	NA	NA	3.187108	0.307049	NA	NA	3223.31	2563.73	35796.07733	NONE
5	133397423	133398426	esv3606840	NONE	0	0.010101	0	Absent	NO_DUP_NO_DEL	NA	NA	NA	NA	NA	NA	3.187108	0.307049	NA	NA	3223.31	2563.73	35796.07733	NONE
5	134952605	134953811	esv3606866	NONE	0.0138889	0	0	Absent	NO_DUP_NO_DEL	NA	NA	NA	NA	1.580954	1.580954	NA	NA	NA	NA	2763.84	2763.84	NA	NONE
5	135115148	135120700	esv3606867	NONE	0.106481	0.616162	0.237864	Absent	DEL_OR_PARTIAL_DEL	NA	NA	NA	NA	1.838888	-1.326362	3.739912	0.370343	2.534554	-0.855584	23567.4	11220.4	NA	NONE
5	135344590	135346295	esv3606875	NONE	0.0648148	0	0	Absent	NO_DUP_NO_DEL	NA	NA	NA	NA	-0.01521	-0.128696	NA	NA	NA	NA	1929.22	1842.53	257871.6	NONE
5	137532488	137533399	esv3606919	NONE	0.0555556	0	0	Absent	NO_DUP_NO_DEL	NA	NA	NA	NA	0.8346	-1.218954	NA	NA	NA	NA	1648.82	1566.67	27717.074	NONE
5	138006561	138008257	esv3606928	NONE	0.00925926	0	0	Absent	NO_DUP_NO_DEL	NA	NA	NA	NA	3.682233	-0.08885	NA	NA	NA	NA	8085.51	1968.54	NA	NONE
5	138065521	138076869	esv3606929	NONE	0.0138889	0	0	Absent	NO_DUP_NO_DEL	NA	NA	NA	NA	0.045405	0.012145	NA	NA	NA	NA	1213.34	758.525	50407.69533	NONE
5	139703462	139703849	esv3606948	NONE	0.0185185	0	0	Absent	NO_DUP_NO_DEL	NA	NA	NA	NA	-0.302237	-0.302237	NA	NA	NA	NA	650.15	650.15	NA	NONE
5	142270500	142272279	esv3607014	NONE	0.0416667	0	0	Absent	NO_DUP_NO_DEL	NA	NA	NA	NA	0.84359	-0.608723	NA	NA	NA	NA	18392.4	18392.4	45844.75881	NONE
5	142618519	142619853	esv3607018	NONE	0	0.030303	0	Absent	NO_DUP_NO_DEL	NA	NA	NA	NA	NA	NA	-0.826469	-0.826469	NA	NA	552.874	552.874	NA	NONE
5	142861183	142866078	esv3607021	NONE	0	0.010101	0	Absent	NO_DUP_NO_DEL	NA	NA	NA	NA	NA	NA	1.583287	1.583287	NA	NA	756.992	756.992	NA	NONE
5	143406102	143409408	esv3607031	NONE	0.0324074	0.010101	0.116505	Absent	NO_DUP_NO_DEL	NA	NA	NA	NA	0.707928	0.707928	0.670992	0.670992	1.659311	1.659311	1935	1935	83718.67	NONE
5	144635347	144636872	esv3607059	NONE	0.037037	0	0	Absent	NO_DUP_NO_DEL	NA	NA	NA	NA	1.744654	0.922131	NA	NA	NA	NA	22385.8	12804.1	236336.38	NONE
5	144871903	144872807	esv3607063	NONE	0.087963	0.247475	0.116505	Ancient	NO_DUP_NO_DEL	NA	NA	NA	NA	0.675759	-0.705647	2.370403	2.006462	1.791028	0.981119	29692.4	2723.92	761670.5133	NONE
5	145792433	145793415	esv3607074	NONE	0.189815	0	0	Absent	NO_DUP_NO_DEL	NA	NA	NA	NA	0.662528	0.582261	NA	NA	NA	NA	19368.5	19368.5	271134.8267	NONE
5	146394714	146397308	esv3607084	NONE	0	0	0.228155	Absent	NO_DUP_NO_DEL	NA	NA	NA	NA	NA	NA	NA	NA	0.807354	-3.462835	42441.4	4207.55	146172.0167	NONE
5	146485307	146487201	esv3607087	NONE	0.0138889	0	0	Absent	NO_DUP_NO_DEL	NA	NA	NA	NA	1.657671	-0.128643	NA	NA	NA	NA	20354.7	1267.23	32255.65	NONE
5	146622654	146623087	esv3607090	NONE	0.412037	0.393939	0.276699	Ancient	NO_DUP_NO_DEL	NA	NA	NA	NA	5.362049	3.642202	6.819653	4.534654	7.842543	4.340896	30887.6	26294.6	2369104.267	NONE
5	146841570	146843612	esv3607093	NONE	0.0231481	0	0	Absent	NO_DUP_NO_DEL	NA	NA	NA	NA	5.13982	-0.013858	NA	NA	NA	NA	45244.9	1915.79	NA	NONE
5	150177636	150181601	esv3607168	NONE	0.115741	0.0505051	0.393204	Absent	NO_DUP_NO_DEL	NA	NA	NA	NA	0.384185	0.23521	2.089596	2.089596	2.446233	2.409367	21103.8	21062.3	700796.005	NONE
5	150203162	150223269	esv3607169	NONE	0.541667	0.0505051	0.432039	Ancient	NO_DUP_NO_DEL	NA	NA	NA	NA	6.181937	1.208586	10.371405	1.111143	9.436538	1.80399	50448.4	50314.3	2471707.604	NONE
5	150789783	150792627	esv3607177	NONE	0.0925926	0.181818	0.432039	Ancient	NO_DUP_NO_DEL	NA	NA	NA	NA	4.567492	2.714042	8.393741	4.538289	7.291868	5.456846	46325.9	31170.5	2691282.964	NONE
5	151249024	151253235	esv3607187	NONE	0.263889	0	0	Ancient	NO_DUP_NO_DEL	NA	NA	NA	NA	1.229197	-1.142787	NA	NA	NA	NA	31841.1	30873.9	911580.2541	NONE
5	151514809	151518869	esv3607196	NONE	0.0277778	0.166667	0.0291262	Absent	NO_DUP_NO_DEL	NA	NA	NA	NA	-0.216736	-0.216736	-0.824865	-0.824865	-0.656031	-0.656031	2543.35	2543.35	312749.85	NONE
5	152420127	152421074	esv3607215	NONE	0.037037	0	0	Absent	NO_DUP_NO_DEL	NA	NA	NA	NA	1.516818	1.024096	NA	NA	NA	NA	5031.78	4490.7	413518.5787	NONE
5	153805386	153807218	esv3607243	NONE	0.240741	0.19697	0.18932	Absent	NO_DUP_NO_DEL	NA	NA	NA	NA	1.870356	0.099475	3.036816	0.445448	4.692067	1.046707	36895.4	35466.7	1170395.427	NONE
5	155311785	155312580	esv3607271	NONE	0.717593	0.318182	0.276699	Ancient	NO_DUP_NO_DEL	NA	NA	NA	NA	-0.422067	-1.276193	-0.47264	-0.707638	-0.762839	-1.055073	58049.4	41829.6	772481.7333	NONE
5	155566445	155591598	esv3607280	NONE	0.0787037	0	0	Absent	NO_DUP_NO_DEL	NA	NA	NA	NA	0.060688	0.060688	NA	NA	NA	NA	4349.23	4349.23	112204.96	NONE
5	155577187	155591409	esv3607281	NONE	0.0787037	0	0	Absent	NO_DUP_NO_DEL	NA	NA	NA	NA	0.060688	0.060688	NA	NA	NA	NA	4349.23	4349.23	112204.96	NONE
5	156538068	156540504	esv3607310	NONE	0.0277778	0	0	Absent	NO_DUP_NO_DEL	NA	NA	NA	NA	0.765758	0.011571	NA	NA	NA	NA	829.627	808.428	214239.732	NONE
5	157291210	157292940	esv3607322	NONE	0.0462963	0	0	Absent	NO_DUP_NO_DEL	NA	NA	NA	NA	0.458982	-0.205071	NA	NA	NA	NA	13300.7	13193.2	NA	NONE
5	158895395	158898713	esv3607341	NONE	0.00462963	0.0707071	0	Absent	NO_DUP_NO_DEL	NA	NA	NA	NA	NA	NA	-1.47096	-1.47096	NA	NA	1448.85	1448.85	51410.296	NONE
5	159022307	159022990	esv3607344	NONE	0.0138889	0.0707071	0.257282	Absent	NO_DUP_NO_DEL	NA	NA	NA	NA	1.09829	-0.056848	2.093751	-0.167509	2.22725	0.736469	21276.4	8599.79	233002.1983	NONE
5	159549319	159549782	esv3607365	NONE	0.0416667	0	0	Absent	NO_DUP_NO_DEL	NA	NA	NA	NA	6.565063	2.973972	NA	NA	NA	NA	30340.4	11012.8	1234459.47	NONE
5	160540665	160550329	esv3607393	NONE	0	0	0.0194175	Absent	NO_DUP_NO_DEL	NA	NA	NA	NA	NA	NA	NA	NA	-3.219994	-3.219994	458.279	458.279	7582.414	NONE
5	160588833	160590290	esv3607397	NONE	0.462963	0.207071	0.0776699	Absent	DEL_OR_PARTIAL_DEL	NA	NA	NA	NA	0.482739	0.482739	1.733559	1.733559	1.202115	1.202115	41816.8	41816.8	1013076.4	NONE
5	161066816	161070921	esv3607406	NONE	0.00925926	0	0	Absent	NO_DUP_NO_DEL	NA	NA	NA	NA	3.536624	3.536624	NA	NA	NA	NA	60779	3657.82	485561.556	NONE
5	161371455	161374430	esv3607410	NONE	0.00925926	0	0	Absent	NO_DUP_NO_DEL	NA	NA	NA	NA	-0.423229	-0.423229	NA	NA	NA	NA	1398.59	1398.59	NA	NONE
5	161558846	161559237	esv3607414	NONE	0	0.010101	0	Absent	NO_DUP_NO_DEL	NA	NA	NA	NA	NA	NA	-0.024775	-0.024775	NA	NA	1383.13	1108.58	NA	NONE
5	161572972	161573697	esv3607415	NONE	0.00925926	0	0	Absent	NO_DUP_NO_DEL	NA	NA	NA	NA	2.623523	-0.698377	NA	NA	NA	NA	3258.97	1125.83	159794.81	NONE
5	162166999	162168083	esv3607435	NONE	0.203704	0	0	Absent	NO_DUP_NO_DEL	NA	NA	NA	NA	0.090189	-1.302618	NA	NA	NA	NA	57898.4	21912	380148.3467	NONE
5	162861761	162863300	esv3607454	NONE	0.0138889	0.116162	0.42233	Absent	NO_DUP_NO_DEL	NA	NA	NA	NA	NA	NA	1.383985	-0.777519	-0.053454	-1.611869	9525.26	9525.26	315483.7	NONE
5	163172098	163183841	esv3607460	NONE	0.0138889	0	0	Absent	NO_DUP_NO_DEL	NA	NA	NA	NA	0.863497	0.863497	NA	NA	NA	NA	1297.15	1188.68	548403.8	NONE
5	163665029	163666466	esv3607472	NONE	0.0833333	0.166667	0.038835	Absent	NO_DUP_NO_DEL	NA	NA	NA	NA	1.312476	1.150713	-0.229596	-0.229596	-1.408178	-1.408178	18951.2	18951.2	139837.6	NONE
5	164141588	164143389	esv3607481	NONE	0	0.0505051	0	Absent	NO_DUP_NO_DEL	NA	NA	NA	NA	NA	NA	-1.294386	-1.882697	NA	NA	2003.21	2003.21	108633.14	NONE
5	165383121	165389726	esv3607498	NONE	0	0	0.00970874	Absent	NO_DUP_NO_DEL	NA	NA	NA	NA	NA	NA	NA	NA	-1.942762	-2.57234	355.316	355.316	NA	NONE
5	165838881	165849967	esv3607505	NONE	0.0555556	0	0	Absent	NO_DUP_NO_DEL	NA	NA	NA	NA	0.729098	-0.51034	NA	NA	NA	NA	19018.5	2828.47	86782.76133	NONE
5	166402763	166403636	esv3607512	NONE	0.00925926	0.247475	0	Absent	NO_DUP_NO_DEL	NA	NA	NA	NA	0.922603	0.922603	-1.224114	-1.224114	NA	NA	17198.8	17198.8	NA	NONE
5	166724390	166729777	esv3607518	NONE	0	0	0.00970874	Absent	NO_DUP_NO_DEL	NA	NA	NA	NA	NA	NA	NA	NA	NA	NA	NA	NA	NA	NONE
5	166858784	166859533	esv3607522	NONE	0.0231481	0	0	Absent	NO_DUP_NO_DEL	NA	NA	NA	NA	0.109811	0.109811	NA	NA	NA	NA	744.282	744.282	55957.104	NONE
5	169440139	169441061	esv3607562	NONE	0.00925926	0	0	Absent	NO_DUP_NO_DEL	NA	NA	NA	NA	0.125856	0.125856	NA	NA	NA	NA	8033.24	8033.24	28506.24	NONE
5	170129842	170131382	esv3607568	NONE	0.287037	0.166667	0.81068	Absent	NO_DUP_NO_DEL	NA	NA	NA	NA	1.369257	1.214517	1.439182	1.315176	2.429364	1.781405	26930.3	17031.4	563022.31	NONE
5	172973014	172974746	esv3607618	NONE	0.148148	0.166667	0.131068	Absent	NO_DUP_NO_DEL	NA	NA	NA	NA	0.367431	-0.088705	-0.088244	-0.413675	0.56619	0.56619	4192.65	4192.65	609729.7267	NONE
5	173090368	173091238	esv3607620	NONE	0.037037	0	0	Absent	NO_DUP_NO_DEL	NA	NA	NA	NA	-0.552964	-0.552964	NA	NA	NA	NA	1409.64	1409.64	8688.974	NONE
5	174130006	174131993	esv3607635	NONE	0.268519	0.0252525	0.00485437	Absent	NO_DUP_NO_DEL	NA	NA	NA	NA	3.880711	0.301562	6.113884	-0.771601	9.183648	-1.594779	21728.7	18807.3	1461797.754	NONE
5	174435699	174440584	esv3607640	NONE	0	0.020202	0.00485437	Absent	NO_DUP_NO_DEL	NA	NA	NA	NA	NA	NA	3.247963	0.668571	1.461416	1.289758	31907.3	11252.2	384403.1291	NONE
5	174475978	174477808	esv3607641	NONE	0.0462963	0	0	Absent	NO_DUP_NO_DEL	NA	NA	NA	NA	1.53394	1.094991	NA	NA	NA	NA	19307.4	1367.05	186024.0643	NONE
5	175504267	175507755	esv3607663	NONE	0.12963	0	0	Absent	DUP	NA	NA	NA	NA	-0.100563	-0.100563	NA	NA	NA	NA	7091.54	7091.54	NA	NONE
5	176229103	176231763	esv3607676	NONE	0.0231481	0	0	Absent	NO_DUP_NO_DEL	NA	NA	NA	NA	1.835107	-0.52022	NA	NA	NA	NA	6786.21	755.4	111902.91	NONE
5	176494999	176496251	esv3607684	NONE	0.467593	0.0252525	0.00485437	Absent	NO_DUP_NO_DEL	NA	NA	NA	NA	3.294557	-0.579684	5.116302	-1.465369	9.435169	-2.554043	40208.7	23869.1	1128277.629	NONE
5	177847666	177852513	esv3607715	NONE	0.00925926	0	0	Absent	NO_DUP_NO_DEL	NA	NA	NA	NA	1.595497	-0.104366	NA	NA	NA	NA	8830.19	721.295	NA	NONE
5	178119201	178121205	esv3607723	NONE	0.0185185	0	0	Absent	NO_DUP_NO_DEL	NA	NA	NA	NA	NA	NA	NA	NA	NA	NA	7531.94	4662.93	252315.5833	NONE
5	178348350	178353192	esv3607730	NONE	0.0231481	0.10101	0	Absent	NO_DUP_NO_DEL	NA	NA	NA	NA	4.634542	3.038943	5.728269	3.688174	NA	NA	32762.2	9014.9	1189905.024	NONE
5	179713144	179713728	esv3607769	NONE	0.00462963	0	0.131068	Absent	NO_DUP_NO_DEL	NA	NA	NA	NA	NA	NA	NA	NA	NA	NA	NA	NA	NA	NONE
5	179842884	179847557	esv3607778	NONE	0.0925926	0	0	Absent	NO_DUP_NO_DEL	NA	NA	NA	NA	NA	NA	NA	NA	NA	NA	3943.45	3943.45	NA	NONE
5	179847334	179848559	esv3607779	NONE	0.0833333	0.111111	0	Absent	DEL_OR_PARTIAL_DEL	NA	NA	NA	NA	NA	NA	NA	NA	NA	NA	19289.3	18550.5	NA	NONE
5	180560466	180563143	esv3607814	NONE	0.12963	0	0.0145631	Absent	NO_DUP_NO_DEL	NA	NA	NA	NA	-0.051627	-0.051627	NA	NA	-0.240885	-0.240885	20175	16647.3	NA	NONE
5	180569234	180569988	esv3607817	NONE	0.449074	0.161616	0.116505	Absent	NO_DUP_NO_DEL	NA	NA	NA	NA	2.876039	0.889854	5.808509	2.210983	6.169675	2.444173	21648.8	15055.7	NA	NONE
5	180680087	180681431	esv3607830	NONE	0.347222	0.020202	0.23301	Ancient	NO_DUP_NO_DEL	NA	NA	NA	NA	NA	NA	NA	NA	NA	NA	35234.5	29835.1	NA	NONE
6	773621	774800	esv3607866	NONE	0.148148	0.126263	0.0242718	Absent	NO_DUP_NO_DEL	NA	NA	NA	NA	0.972448	0.972448	5.744883	5.744883	6.900537	6.900537	32774.9	15258.2	373872.625	NONE
6	2207341	2208392	esv3607906	NONE	0.0416667	0	0	Absent	NO_DUP_NO_DEL	NA	NA	NA	NA	0.486924	-0.822744	NA	NA	NA	NA	2053.58	1965.92	NA	NONE
6	2568176	2571941	esv3607910	NONE	0.171296	0.0505051	0	Ancient	NO_DUP_NO_DEL	NA	NA	NA	NA	2.087928	1.490141	2.357715	1.061501	NA	NA	31687.9	31687.9	2460459.407	NONE
6	3619212	3621884	esv3607935	NONE	0	0.0151515	0.092233	Absent	NO_DUP_NO_DEL	NA	NA	NA	NA	NA	NA	4.234852	2.57279	4.326916	2.292182	3593.51	2749.94	1363605.81	NONE
6	4255520	4256706	esv3607943	NONE	0.00925926	0	0	Absent	NO_DUP_NO_DEL	NA	NA	NA	NA	1.211592	1.211592	NA	NA	NA	NA	2491.44	2491.44	NA	NONE
6	5898451	5898882	esv3607984	NONE	0.12037	0.242424	0.131068	Absent	NO_DUP_NO_DEL	NA	NA	NA	NA	2.72082	2.083011	4.428132	4.428132	5.153949	5.007874	34336	24018.4	1692057.871	NONE
6	8164107	8170828	esv3608027	NONE	0.0185185	0	0	Absent	NO_DUP_NO_DEL	NA	NA	NA	NA	6.839091	-1.350727	NA	NA	NA	NA	2087.89	1868.18	14574.707	NONE
6	8337673	8341524	esv3608028	NONE	0.125	0.277778	0.0145631	Absent	NO_DUP_NO_DEL	NA	NA	NA	NA	0.529106	0.137256	-0.436321	-0.436321	1.023995	0.424137	2877.09	2184.86	412394.1733	NONE
6	8368379	8369441	esv3608030	NONE	0	0.040404	0.140777	Introgressed	NO_DUP_NO_DEL	NA	NA	NA	NA	NA	NA	1.032497	-0.293104	0.9736	-0.318674	2738.53	2631.76	221171.384	NONE
6	8925179	8932875	esv3608041	NONE	0	0.010101	0	Absent	NO_DUP_NO_DEL	NA	NA	NA	NA	NA	NA	-0.589466	-0.589466	NA	NA	522.064	522.064	NA	NONE
6	9273819	9274953	esv3608048	NONE	0.319444	0.111111	0.252427	Absent	NO_DUP_NO_DEL	NA	NA	NA	NA	0.721418	-0.448904	1.184487	-0.785229	2.275779	-0.670664	40115.2	40115.2	720860	NONE
6	9359539	9360382	esv3608049	NONE	0	0	0.00970874	Absent	NO_DUP_NO_DEL	NA	NA	NA	NA	NA	NA	NA	NA	-1.48386	-2.245421	900.903	758.126	17878.812	NONE
6	10264425	10265263	esv3608068	NONE	0.189815	0.888889	0.621359	Absent	NO_DUP_NO_DEL	NA	NA	NA	NA	2.908889	2.643357	5.292308	4.094574	4.864324	2.899195	35501.1	28964.1	2604270.582	NONE
6	10657998	10660886	esv3608081	NONE	0.106481	0	0.0485437	Ancient	DUP	NA	NA	NA	NA	1.007102	0.467588	NA	NA	3.61288	0.202195	23349	22253.5	291041.9089	NONE
6	10740673	10744942	esv3608083	NONE	0.0277778	0	0	Absent	NO_DUP_NO_DEL	NA	NA	NA	NA	0.676594	0.150162	NA	NA	NA	NA	9809.77	9809.77	44709.14	NONE
6	12393281	12394192	esv3608110	NONE	0	0	0.0582524	Introgressed	NO_DUP_NO_DEL	NA	NA	NA	NA	NA	NA	NA	NA	1.177819	0.322671	2953.6	2779.59	1150260.953	NONE
6	13882549	13883852	esv3608140	NONE	0.0324074	0.444444	0.466019	Absent	NO_DUP_NO_DEL	NA	NA	NA	NA	3.104579	0.742555	6.47435	-1.466844	8.371386	-2.898016	25736.6	14885.2	758289.5895	NONE
6	15666751	15667661	esv3608178	NONE	0.333333	0.0808081	0.00485437	Absent	NO_DUP_NO_DEL	NA	NA	NA	NA	0.510921	0.5088	3.363962	-0.234792	6.004345	1.77229	18830.8	12642.6	317900.856	NONE
6	16884968	16886117	esv3608200	NONE	0.0277778	0.171717	0.257282	Absent	NO_DUP_NO_DEL	NA	NA	NA	NA	0.863281	-0.242523	-0.80146	-0.829769	-0.53039	-1.51265	16794.2	16794.2	414802.08	NONE
6	17376702	17381506	esv3608210	NONE	0.0694444	0.156566	0.0485437	Absent	NO_DUP_NO_DEL	NA	NA	NA	NA	0.209682	0.209682	-1.547037	-1.547037	-1.159206	-1.159206	7724.1	5271.02	174253.45	NONE
6	17438251	17441911	esv3608212	NONE	0.0787037	0	0.0339806	Absent	NO_DUP_NO_DEL	NA	NA	NA	NA	1.490506	1.490506	NA	NA	2.058149	2.058149	7811.72	7811.72	278869.78	NONE
6	17727731	17728776	esv3608222	NONE	0.0416667	0	0	Absent	NO_DUP_NO_DEL	NA	NA	NA	NA	-0.032998	-0.032998	NA	NA	NA	NA	4911.23	4911.23	43095.136	NONE
6	18106946	18112922	esv3608230	NONE	0.037037	0	0	Absent	NO_DUP_NO_DEL	NA	NA	NA	NA	1.96317	-0.080179	NA	NA	NA	NA	9387.67	9387.67	40018.16	NONE
6	18326411	18327801	esv3608235	NONE	0	0	0.00970874	Absent	NO_DUP_NO_DEL	NA	NA	NA	NA	NA	NA	NA	NA	-0.543221	-0.543221	677.972	677.972	NA	NONE
6	18402112	18402924	esv3608240	NONE	0.416667	0.631313	0.81068	Absent	NO_DUP_NO_DEL	NA	NA	NA	NA	0.76653	0.76653	0.591152	0.591152	-0.067971	-0.067971	63201.1	54016.7	667499	NONE
6	18402131	18402447	esv3608241	NONE	0.421296	0.631313	0.81068	Absent	NO_DUP_NO_DEL	NA	NA	NA	NA	0.76653	0.76653	0.591152	0.591152	-0.067971	-0.067971	63201.1	54016.7	667499	NONE
6	19676414	19677461	esv3608279	NONE	0.296296	0.0909091	0	Ancient	NO_DUP_NO_DEL	NA	NA	NA	NA	1.985168	0.720332	2.332124	0.152636	NA	NA	46481.5	25504.4	878753.0733	NONE
6	19685573	19686511	esv3608280	NONE	0.208333	0.131313	0.199029	Absent	NO_DUP_NO_DEL	NA	NA	NA	NA	1.80773	1.80773	2.249897	2.186764	0.953027	0.953027	35818.3	35818.3	447979.168	NONE
6	20241259	20243277	esv3608289	NONE	0.0138889	0	0	Absent	NO_DUP_NO_DEL	NA	NA	NA	NA	0.051879	0.051879	NA	NA	NA	NA	470.883	393.346	NA	NONE
[truncated: 2,864 more rows]
