# Supplementary material for: Balancing selection on genomic deletion polymorphisms in humans
Source: eLife. 2023 Jan 10;12:e79111. doi: 10.7554/eLife.79111 (PMC9943071; doi:10.7554/eLife.79111)
Supplement: Supplementary file 3. [file elife-79111-supp3.csv]

3mm_asymmetry_index_(left)	EYE
3mm_asymmetry_index_(right)	EYE
3mm_cylindrical_power_(left)	EYE
3mm_regularity_index_(left)	EYE
3mm_regularity_index_(right)	EYE
3mm_strong_meridian_(left)	EYE
3mm_strong_meridian_(right)	EYE
3mm_weak_meridian_(left)	EYE
3mm_weak_meridian_(right)	EYE
6mm_cylindrical_power_(left)	EYE
6mm_cylindrical_power_(right)	EYE
6mm_strong_meridian_(left)	EYE
6mm_strong_meridian_(right)	EYE
6mm_weak_meridian_(left)	EYE
6mm_weak_meridian_(right)	EYE
Achalasia_of_cardia	DIGESTIVE
Achilles_tendinitis	OTHERS
Actinic_keratosis	SKIN
Actions_taken_following_self-harm:_Receive_help_from_friends_/_family_/_neighbours	OTHERS
Actions_taken_following_self-harm:_See_anyone_from_psychiatric_or_mental_health_services__including_liaison_services	OTHERS
Actions_taken_following_self-harm:_See_own_GP	OTHERS
Acute_alcohol_intoxication	OTHERS
Adhesive_capsulitis_of_shoulder	OTHERS
Adopted_as_a_child	OTHERS
Adult-onset_Still_disease	INFLAMMATORY
Age_asthma_diagnosed	RESPIRATORY
Age_diabetes_diagnosed	METABOLISM
Age_first_had_sexual_intercourse	OTHERS
Age_hayfever_or_allergic_rhinitis_diagnosed_by_doctor	INFLAMMATORY
Age_started_wearing_glasses_or_contact_lenses	EYE
Age_when_periods_started_(menarche)	FEMALE
Alanine_aminotransferase_(U/L)	BLOOD
Albumin_(g/L)	BLOOD
Alcohol_abuse__main_dg	OTHERS
Alcohol_intake_frequency.	OTHERS
Alkaline_phosphatase_(U/L)	BLOOD
All_influenza_(not_pneumonia)	IMMUNE
Alzheimer�s_disease	NEURO
Ankle_spacing_width	ANTHROPOMETRIC
Ankle_spacing_width_(left)	ANTHROPOMETRIC
Ankle_spacing_width_(right)	ANTHROPOMETRIC
Anxiety_disorders	MENTAL
Any_dementia	NEURO
Any_mental_disorder	MENTAL
Apoliprotein_A_(g/L)	BLOOD
Apoliprotein_B_(g/L)	BLOOD
Arm_fat-free_mass_(left)	ANTHROPOMETRIC
Arm_fat-free_mass_(right)	ANTHROPOMETRIC
Arm_fat_mass_(left)	ANTHROPOMETRIC
Arm_fat_mass_(right)	ANTHROPOMETRIC
Arm_fat_percentage_(left)	ANTHROPOMETRIC
Arm_fat_percentage_(right)	ANTHROPOMETRIC
Arm_predicted_mass_(left)	ANTHROPOMETRIC
Arm_predicted_mass_(right)	ANTHROPOMETRIC
Arthropathic_psoriasis	SKIN
Aspartate_aminotransferase_(U/L)	BLOOD
Asthma	RESPIRATORY
Asthma__hospital_admissions_1	RESPIRATORY
Attendance/disability/mobility_allowance:_Attendance_allowance	OTHERS
Attendance/disability/mobility_allowance:_None_of_the_above	OTHERS
Average_monthly_intake_of_other_alcoholic_drinks	OTHERS
Average_total_household_income_before_tax	OTHERS
Background_diabetic_retinopathy	EYE
Background_retinopathy_and_retinal_vascular_changes	EYE
Bacterial_intestinal_infections__IBD_co-morbidities	IMMUNE
Bacterial_pneumonia_(organism_specified)	IMMUNE
Basal_metabolic_rate	METABOLISM
Basophill_count	IMMUNE
Basophill_percentage	IMMUNE
Behavioural_and_miscellaneous_addictions:_Something_else_not_mentioned	OTHERS
Bell's_palsy	OTHERS
Bipolar_and_major_depression_status:_Bipolar_II_Disorder	MENTAL
Birth_weight_of_first_child	OTHERS
Blood_clot__DVT__bronchitis__emphysema__asthma__rhinitis__eczema__allergy_diagnosed_by_doctor:_Asthma	RESPIRATORY
Blood_clot__DVT__bronchitis__emphysema__asthma__rhinitis__eczema__allergy_diagnosed_by_doctor:_Hayfever__allergic_rhinitis_or_eczema	INFLAMMATORY
Blood_clot__DVT__bronchitis__emphysema__asthma__rhinitis__eczema__allergy_diagnosed_by_doctor:_None_of_the_above	INFLAMMATORY
Body_fat_percentage	ANTHROPOMETRIC
Body_mass_index_(BMI)	ANTHROPOMETRIC
Bread_type:_Other_type_of_bread	OTHERS
Bread_type:_White	OTHERS
Breathing_problems_responsible_for_leaving_job:_Yes	RESPIRATORY
Bronchitis	RESPIRATORY
Bursitis_of_shoulder	OTHERS
Cake_intake	OTHERS
Calcium	BLOOD
Calcium_(mmol/L)	BLOOD
Campylobacter_enteritis	IMMUNE
Cancer_code__self-reported:_basal_cell_carcinoma	CANCER
Cancer_code__self-reported:_bladder_cancer	CANCER
Cancer_code__self-reported:_brain_cancer_/_primary_malignant_brain_tumour	CANCER
Cancer_code__self-reported:_chronic_lymphocytic	CANCER
Cancer_code__self-reported:_colon_cancer/sigmoid_cancer	CANCER
Cancer_code__self-reported:_kidney/renal_cell_cancer	CANCER
Cancer_code__self-reported:_large_bowel_cancer/colorectal_cancer	CANCER
Cancer_code__self-reported:_larynx/throat_cancer	CANCER
Cancer_code__self-reported:_liver/hepatocellular_cancer	CANCER
Cancer_code__self-reported:_lung_cancer	CANCER
Cancer_code__self-reported:_malignant_melanoma	CANCER
Cancer_code__self-reported:_non-hodgkins_lymphoma	CANCER
Cancer_code__self-reported:_non-melanoma_skin_cancer	CANCER
Cancer_code__self-reported:_rodent_ulcer	CANCER
Cancer_code__self-reported:_skin_cancer	CANCER
Cancer_code__self-reported:_stomach_cancer	CANCER
Cancer_code__self-reported:_tongue_cancer	CANCER
Cancer_code__self-reported:_unclassifiable	CANCER
Cancer_diagnosed_by_doctor	CANCER
Carbohydrate	OTHERS
Carpal_tunnel_syndrome	OTHERS
Cereal_type:_Other_(e.g._Cornflakes__Frosties)	OTHERS
Cerebral_palsy_and_other_paralytic_syndromes	NEURO
Cervicalgia	OTHERS
Chalazion	OTHERS
Cheese_intake	OTHERS
Childhood_asthma_(age<16)	RESPIRATORY
Childhood_sunburn_occasions	OTHERS
Chirrosis_of_liver__NAS	OTHERS
Cholangitis_(sclerosing)	IMMUNE
Cholesterol_(mmol/L)	BLOOD
Chrondropathies	OTHERS
Chronic_gastritis	INFLAMMATORY
Chron's_disease_NAS	INFLAMMATORY
Coeliac_disease	IMMUNE
Coffee_intake	OTHERS
Comparative_body_size_at_age_10	ANTHROPOMETRIC
Comparative_height_size_at_age_10	ANTHROPOMETRIC
Completion_status_of_test:_Incomplete_-_other_reason	OTHERS
Concussion	OTHERS
Congenital_malformations__deformations_and_chromosomal_abnormalities	OTHERS
Consecutive_night_shifts_during_mixed_shift_periods	OTHERS
Contracture_of_joint	OTHERS
Convergent_concomitant_strabismus	EYE
COPD_differential_diagnosis	RESPIRATORY
Corneal_hysteresis_(left)	EYE
Corneal_resistance_factor_(left)	EYE
Corneal_resistance_factor_(right)	EYE
Corneal_ulcer	EYE
Coronary_atherosclerosis	CARDIO
Coxarthrosis_[arthrosis_of_hip](FG)	OTHERS
C-reactive_protein_(mg/L)	BLOOD
Creatinine_(umol/L)	BLOOD
Crohn's_disease_of_large_intestine	INFLAMMATORY
Crohn's_disease_of_small_interstine	INFLAMMATORY
Current_employment_status:_Full_or_part-time_student	OTHERS
Current_eye_infection	EYE
Cylindrical_power_(left)	EYE
Cylindrical_power_(right)	EYE
Cystatin_C_(mg/L)	BLOOD
Dark_chocolate_intake	OTHERS
Day-of-week_questionnaire_completion_requested:_Sunday	OTHERS
Daytime_dozing_/_sleeping_(narcolepsy)	OTHERS
Degeneration_of_macula_and_posterior_pole	EYE
Delivery_methods:_Low_forceps__not_breech	OTHERS
Dementia	NEURO
Demyelenating_diseases_of_the_central_nervous_system	NEURO
Destinations_on_discharge_from_hospital_(recoded):_Other_hospital:_Non-NHS	OTHERS
Detention_categories:_Formally_detained_under_Part_II__Mental_Health_Act_1983	OTHERS
Diabetes_diagnosed_by_doctor	METABOLISM
Diabetic_ketoacidosis	METABOLISM
Diagnoses_-_main_ICD10:_A04_Other_bacterial_intestinal_infections	IMMUNE
Diagnoses_-_main_ICD10:_A09_Diarrhoea_and_gastro-enteritis_of_presumed_infectious_origin	IMMUNE
Diagnoses_-_main_ICD10:_A63_Other_predominantly_sexually_transmitted_diseases__not_elsewhere_classified	IMMUNE
Diagnoses_-_main_ICD10:_A87_Viral_meningitis	IMMUNE
Diagnoses_-_main_ICD10:_B02_Zoster_[herpes_zoster]	IMMUNE
Diagnoses_-_main_ICD10:_B34_Viral_infection_of_unspecified_site	IMMUNE
Diagnoses_-_main_ICD10:_C01_Malignant_neoplasm_of_base_of_tongue	CANCER
Diagnoses_-_main_ICD10:_C02_Malignant_neoplasm_of_other_and_unspecified_parts_of_tongue	CANCER
Diagnoses_-_main_ICD10:_C09_Malignant_neoplasm_of_tonsil	CANCER
Diagnoses_-_main_ICD10:_C16_Malignant_neoplasm_of_stomach	CANCER
Diagnoses_-_main_ICD10:_C17_Malignant_neoplasm_of_small_intestine	CANCER
Diagnoses_-_main_ICD10:_C18_Malignant_neoplasm_of_colon	CANCER
Diagnoses_-_main_ICD10:_C21_Malignant_neoplasm_of_anus_and_anal_canal	CANCER
Diagnoses_-_main_ICD10:_C25_Malignant_neoplasm_of_pancreas	CANCER
Diagnoses_-_main_ICD10:_C34_Malignant_neoplasm_of_bronchus_and_lung	CANCER
Diagnoses_-_main_ICD10:_C43_Malignant_melanoma_of_skin	CANCER
Diagnoses_-_main_ICD10:_C44_Other_malignant_neoplasms_of_skin	CANCER
Diagnoses_-_main_ICD10:_C48_Malignant_neoplasm_of_retroperitoneum_and_peritoneum	CANCER
Diagnoses_-_main_ICD10:_C49_Malignant_neoplasm_of_other_connective_and_soft_tissue	CANCER
Diagnoses_-_main_ICD10:_C53_Malignant_neoplasm_of_cervix_uteri	CANCER
Diagnoses_-_main_ICD10:_C56_Malignant_neoplasm_of_ovary	CANCER
Diagnoses_-_main_ICD10:_C62_Malignant_neoplasm_of_testis	CANCER
Diagnoses_-_main_ICD10:_C64_Malignant_neoplasm_of_kidney__except_renal_pelvis	CANCER
Diagnoses_-_main_ICD10:_C73_Malignant_neoplasm_of_thyroid_gland	CANCER
Diagnoses_-_main_ICD10:_C80_Malignant_neoplasm_without_specification_of_site	CANCER
Diagnoses_-_main_ICD10:_C81_Hodgkin's_disease	CANCER
Diagnoses_-_main_ICD10:_C82_Follicular_[nodular]_non-Hodgkin's_lymphoma	CANCER
Diagnoses_-_main_ICD10:_C83_Diffuse_non-Hodgkin's_lymphoma	CANCER
Diagnoses_-_main_ICD10:_C85_Other_and_unspecified_types_of_non-Hodgkin's_lymphoma	CANCER
Diagnoses_-_main_ICD10:_C91_Lymphoid_leukaemia	CANCER
Diagnoses_-_main_ICD10:_C92_Myeloid_leukaemia	CANCER
Diagnoses_-_main_ICD10:_D03_Melanoma_in_situ	CANCER
Diagnoses_-_main_ICD10:_D05_Carcinoma_in_situ_of_breast	CANCER
Diagnoses_-_main_ICD10:_D07_Carcinoma_in_situ_of_other_and_unspecified_genital_organs	CANCER
Diagnoses_-_main_ICD10:_D09_Carcinoma_in_situ_of_other_and_unspecified_sites	CANCER
Diagnoses_-_main_ICD10:_D11_Benign_neoplasm_of_major_salivary_glands	CANCER
Diagnoses_-_main_ICD10:_D13_Benign_neoplasm_of_other_and_ill-defined_parts_of_digestive_system	CANCER
Diagnoses_-_main_ICD10:_D17_Benign_lipomatous_neoplasm	CANCER
Diagnoses_-_main_ICD10:_D18_Haemangioma_and_lymphangioma__any_site	CANCER
Diagnoses_-_main_ICD10:_D21_Other_benign_neoplasms_of_connective_and_other_soft_tissue	CANCER
Diagnoses_-_main_ICD10:_D24_Benign_neoplasm_of_breast	CANCER
Diagnoses_-_main_ICD10:_D25_Leiomyoma_of_uterus	CANCER
Diagnoses_-_main_ICD10:_D26_Other_benign_neoplasms_of_uterus	CANCER
Diagnoses_-_main_ICD10:_D27_Benign_neoplasm_of_ovary	CANCER
Diagnoses_-_main_ICD10:_D28_Benign_neoplasm_of_other_and_unspecified_female_genital_organs	CANCER
Diagnoses_-_main_ICD10:_D33_Benign_neoplasm_of_brain_and_other_parts_of_central_nervous_system	CANCER
Diagnoses_-_main_ICD10:_D36_Benign_neoplasm_of_other_and_unspecified_sites	CANCER
Diagnoses_-_main_ICD10:_D38_Neoplasm_of_uncertain_or_unknown_behaviour_of_middle_ear_and_respiratory_and_intrathoracic_organs	CANCER
Diagnoses_-_main_ICD10:_D41_Neoplasm_of_uncertain_or_unknown_behaviour_of_urinary_organs	CANCER
Diagnoses_-_main_ICD10:_D43_Neoplasm_of_uncertain_or_unknown_behaviour_of_brain_and_central_nervous_system	CANCER
Diagnoses_-_main_ICD10:_D44_Neoplasm_of_uncertain_or_unknown_behaviour_of_endocrine_glands	CANCER
Diagnoses_-_main_ICD10:_D61_Other_aplastic_anaemias	BLOOD
Diagnoses_-_main_ICD10:_D63_Anaemia_in_chronic_diseases_classified_elsewhere	BLOOD
Diagnoses_-_main_ICD10:_D64_Other_anaemias	BLOOD
Diagnoses_-_main_ICD10:_D86_Sarcoidosis	OTHERS
Diagnoses_-_main_ICD10:_E03_Other_hypothyroidism	HARMONAL
Diagnoses_-_main_ICD10:_E04_Other_non-toxic_goitre	HARMONAL
Diagnoses_-_main_ICD10:_E10_Insulin-dependent_diabetes_mellitus	METABOLISM
Diagnoses_-_main_ICD10:_E14_Unspecified_diabetes_mellitus	METABOLISM
Diagnoses_-_main_ICD10:_E21_Hyperparathyroidism_and_other_disorders_of_parathyroid_gland	HARMONAL
Diagnoses_-_main_ICD10:_E66_Obesity	METABOLISM
Diagnoses_-_main_ICD10:_E83_Disorders_of_mineral_metabolism	METABOLISM
Diagnoses_-_main_ICD10:_F05_Delirium__not_induced_by_alcohol_and_other_psychoactive_substances	NEURO
Diagnoses_-_main_ICD10:_F10_Mental_and_behavioural_disorders_due_to_use_of_alcohol	OTHERS
Diagnoses_-_main_ICD10:_F20_Schizophrenia	NEURO
Diagnoses_-_main_ICD10:_F43_Reaction_to_severe_stress__and_adjustment_disorders	MENTAL
Diagnoses_-_main_ICD10:_F45_Somatoform_disorders	MENTAL
Diagnoses_-_main_ICD10:_F52_Sexual_dysfunction__not_caused_by_organic_disorder_or_disease	OTHERS
Diagnoses_-_main_ICD10:_G20_Parkinson's_disease	NEURO
Diagnoses_-_main_ICD10:_G24_Dystonia	NEURO
Diagnoses_-_main_ICD10:_G35_Multiple_sclerosis	NEURO
Diagnoses_-_main_ICD10:_G37_Other_demyelinating_diseases_of_central_nervous_system	NEURO
Diagnoses_-_main_ICD10:_G43_Migraine	NEURO
Diagnoses_-_main_ICD10:_G51_Facial_nerve_disorders	NEURO
Diagnoses_-_main_ICD10:_G54_Nerve_root_and_plexus_disorders	NEURO
Diagnoses_-_main_ICD10:_G56_Mononeuropathies_of_upper_limb	NEURO
Diagnoses_-_main_ICD10:_G58_Other_mononeuropathies	NEURO
Diagnoses_-_main_ICD10:_G61_Inflammatory_polyneuropathy	NEURO
Diagnoses_-_main_ICD10:_G93_Other_disorders_of_brain	NEURO
Diagnoses_-_main_ICD10:_G95_Other_diseases_of_spinal_cord	NEURO
Diagnoses_-_main_ICD10:_H00_Hordeolum_and_chalazion	EYE
Diagnoses_-_main_ICD10:_H01_Other_inflammation_of_eyelid	EYE
Diagnoses_-_main_ICD10:_H02_Other_disorders_of_eyelid	EYE
Diagnoses_-_main_ICD10:_H11_Other_disorders_of_conjunctiva	EYE
Diagnoses_-_main_ICD10:_H27_Other_disorders_of_lens	EYE
Diagnoses_-_main_ICD10:_H33_Retinal_detachments_and_breaks	EYE
Diagnoses_-_main_ICD10:_H35_Other_retinal_disorders	EYE
Diagnoses_-_main_ICD10:_H40_Glaucoma	EYE
Diagnoses_-_main_ICD10:_H49_Paralytic_strabismus	EYE
Diagnoses_-_main_ICD10:_H50_Other_strabismus	EYE
Diagnoses_-_main_ICD10:_H52_Disorders_of_refraction_and_accommodation	EYE
Diagnoses_-_main_ICD10:_H53_Visual_disturbances	EYE
Diagnoses_-_main_ICD10:_H59_Postprocedural_disorders_of_eye_and_adnexa__not_elsewhere_classified	EYE
Diagnoses_-_main_ICD10:_H60_Otitis_externa	OTHERS
Diagnoses_-_main_ICD10:_H61_Other_disorders_of_external_ear	OTHERS
Diagnoses_-_main_ICD10:_H66_Suppurative_and_unspecified_otitis_media	OTHERS
Diagnoses_-_main_ICD10:_H71_Cholesteatoma_of_middle_ear	OTHERS
Diagnoses_-_main_ICD10:_H73_Other_disorders_of_tympanic_membrane	OTHERS
Diagnoses_-_main_ICD10:_H91_Other_hearing_loss	OTHERS
Diagnoses_-_main_ICD10:_H93_Other_disorders_of_ear__not_elsewhere_classified	OTHERS
Diagnoses_-_main_ICD10:_I08_Multiple_valve_diseases	CARDIO
Diagnoses_-_main_ICD10:_I10_Essential_(primary)_hypertension	CARDIO
Diagnoses_-_main_ICD10:_I12_Hypertensive_renal_disease	CARDIO
Diagnoses_-_main_ICD10:_I25_Chronic_ischaemic_heart_disease	CARDIO
Diagnoses_-_main_ICD10:_I46_Cardiac_arrest	CARDIO
Diagnoses_-_main_ICD10:_I49_Other_cardiac_arrhythmias	CARDIO
Diagnoses_-_main_ICD10:_I50_Heart_failure	CARDIO
Diagnoses_-_main_ICD10:_I51_Complications_and_ill-defined_descriptions_of_heart_disease	CARDIO
Diagnoses_-_main_ICD10:_I65_Occlusion_and_stenosis_of_precerebral_arteries__not_resulting_in_cerebral_infarction	CARDIO
Diagnoses_-_main_ICD10:_I72_Other_aneurysm	CARDIO
Diagnoses_-_main_ICD10:_I80_Phlebitis_and_thrombophlebitis	CARDIO
Diagnoses_-_main_ICD10:_I83_Varicose_veins_of_lower_extremities	CARDIO
Diagnoses_-_main_ICD10:_I86_Varicose_veins_of_other_sites	CARDIO
Diagnoses_-_main_ICD10:_I87_Other_disorders_of_veins	CARDIO
Diagnoses_-_main_ICD10:_I95_Hypotension	CARDIO
Diagnoses_-_main_ICD10:_J01_Acute_sinusitis	INFLAMMATORY
Diagnoses_-_main_ICD10:_J02_Acute_pharyngitis	INFLAMMATORY
Diagnoses_-_main_ICD10:_J03_Acute_tonsillitis	INFLAMMATORY
Diagnoses_-_main_ICD10:_J13_Pneumonia_due_to_Streptococcus_pneumoniae	IMMUNE
Diagnoses_-_main_ICD10:_J15_Bacterial_pneumonia__not_elsewhere_classified	IMMUNE
Diagnoses_-_main_ICD10:_J22_Unspecified_acute_lower_respiratory_infection	IMMUNE
Diagnoses_-_main_ICD10:_J31_Chronic_rhinitis__nasopharyngitis_and_pharyngitis	INFLAMMATORY
Diagnoses_-_main_ICD10:_J32_Chronic_sinusitis	INFLAMMATORY
Diagnoses_-_main_ICD10:_J33_Nasal_polyp	OTHERS
Diagnoses_-_main_ICD10:_J36_Peritonsillar_abscess	OTHERS
Diagnoses_-_main_ICD10:_J38_Diseases_of_vocal_cords_and_larynx__not_elsewhere_classified	OTHERS
Diagnoses_-_main_ICD10:_J39_Other_diseases_of_upper_respiratory_tract	RESPIRATORY
Diagnoses_-_main_ICD10:_J40_Bronchitis__not_specified_as_acute_or_chronic	RESPIRATORY
Diagnoses_-_main_ICD10:_J43_Emphysema	RESPIRATORY
Diagnoses_-_main_ICD10:_J45_Asthma	RESPIRATORY
Diagnoses_-_main_ICD10:_J86_Pyothorax	RESPIRATORY
Diagnoses_-_main_ICD10:_J93_Pneumothorax	RESPIRATORY
Diagnoses_-_main_ICD10:_J96_Respiratory_failure__not_elsewhere_classified	RESPIRATORY
Diagnoses_-_main_ICD10:_J98_Other_respiratory_disorders	RESPIRATORY
Diagnoses_-_main_ICD10:_K04_Diseases_of_pulp_and_periapical_tissues	OTHERS
Diagnoses_-_main_ICD10:_K05_Gingivitis_and_periodontal_diseases	TEETH
Diagnoses_-_main_ICD10:_K08_Other_disorders_of_teeth_and_supporting_structures	TEETH
Diagnoses_-_main_ICD10:_K09_Cysts_of_oral_region__not_elsewhere_classified	TEETH
Diagnoses_-_main_ICD10:_K11_Diseases_of_salivary_glands	TEETH
Diagnoses_-_main_ICD10:_K13_Other_diseases_of_lip_and_oral_mucosa	TEETH
Diagnoses_-_main_ICD10:_K14_Diseases_of_tongue	TEETH
Diagnoses_-_main_ICD10:_K26_Duodenal_ulcer	DIGESTIVE
Diagnoses_-_main_ICD10:_K51_Ulcerative_colitis	DIGESTIVE
Diagnoses_-_main_ICD10:_K55_Vascular_disorders_of_intestine	DIGESTIVE
Diagnoses_-_main_ICD10:_K61_Abscess_of_anal_and_rectal_regions	DIGESTIVE
Diagnoses_-_main_ICD10:_K65_Peritonitis	OTHERS
Diagnoses_-_main_ICD10:_K66_Other_disorders_of_peritoneum	OTHERS
Diagnoses_-_main_ICD10:_K70_Alcoholic_liver_disease	METABOLISM
Diagnoses_-_main_ICD10:_K75_Other_inflammatory_liver_diseases	METABOLISM
Diagnoses_-_main_ICD10:_K76_Other_diseases_of_liver	METABOLISM
Diagnoses_-_main_ICD10:_K80_Cholelithiasis	DIGESTIVE
Diagnoses_-_main_ICD10:_K83_Other_diseases_of_biliary_tract	DIGESTIVE
Diagnoses_-_main_ICD10:_K85_Acute_pancreatitis	DIGESTIVE
Diagnoses_-_main_ICD10:_K90_Intestinal_malabsorption	DIGESTIVE
Diagnoses_-_main_ICD10:_L08_Other_local_infections_of_skin_and_subcutaneous_tissue	SKIN
Diagnoses_-_main_ICD10:_L27_Dermatitis_due_to_substances_taken_internally	SKIN
Diagnoses_-_main_ICD10:_L28_Lichen_simplex_chronicus_and_prurigo	SKIN
Diagnoses_-_main_ICD10:_L40_Psoriasis	SKIN
Diagnoses_-_main_ICD10:_L50_Urticaria	SKIN
Diagnoses_-_main_ICD10:_L53_Other_erythematous_conditions	SKIN
Diagnoses_-_main_ICD10:_L57_Skin_changes_due_to_chronic_exposure_to_nonionising_radiation	SKIN
Diagnoses_-_main_ICD10:_L60_Nail_disorders	SKIN
Diagnoses_-_main_ICD10:_L72_Follicular_cysts_of_skin_and_subcutaneous_tissue	SKIN
Diagnoses_-_main_ICD10:_L73_Other_follicular_disorders	SKIN
Diagnoses_-_main_ICD10:_L81_Other_disorders_of_pigmentation	SKIN
Diagnoses_-_main_ICD10:_L82_Seborrhoeic_keratosis	SKIN
Diagnoses_-_main_ICD10:_L92_Granulomatous_disorders_of_skin_and_subcutaneous_tissue	SKIN
Diagnoses_-_main_ICD10:_L97_Ulcer_of_lower_limb__not_elsewhere_classified	OTHERS
Diagnoses_-_main_ICD10:_M05_Seropositive_rheumatoid_arthritis	INFLAMMATORY
Diagnoses_-_main_ICD10:_M06_Other_rheumatoid_arthritis	INFLAMMATORY
Diagnoses_-_main_ICD10:_M10_Gout	INFLAMMATORY
Diagnoses_-_main_ICD10:_M16_Coxarthrosis_[arthrosis_of_hip]	OTHERS
Diagnoses_-_main_ICD10:_M19_Other_arthrosis	OTHERS
Diagnoses_-_main_ICD10:_M22_Disorders_of_patella	OTHERS
Diagnoses_-_main_ICD10:_M24_Other_specific_joint_derangements	OTHERS
Diagnoses_-_main_ICD10:_M35_Other_systemic_involvement_of_connective_tissue	OTHERS
Diagnoses_-_main_ICD10:_M43_Other_deforming_dorsopathies	OTHERS
Diagnoses_-_main_ICD10:_M45_Ankylosing_spondylitis	INFLAMMATORY
Diagnoses_-_main_ICD10:_M47_Spondylosis	OTHERS
Diagnoses_-_main_ICD10:_M48_Other_spondylopathies	OTHERS
Diagnoses_-_main_ICD10:_M50_Cervical_disk_disorders	OTHERS
Diagnoses_-_main_ICD10:_M53_Other_dorsopathies__not_elsewhere_classified	OTHERS
Diagnoses_-_main_ICD10:_M66_Spontaneous_rupture_of_synovium_and_tendon	OTHERS
Diagnoses_-_main_ICD10:_M76_Enthesopathies_of_lower_limb__excluding_foot	OTHERS
Diagnoses_-_main_ICD10:_M77_Other_enthesopathies	OTHERS
Diagnoses_-_main_ICD10:_M86_Osteomyelitis	INFLAMMATORY
Diagnoses_-_main_ICD10:_M93_Other_osteochondropathies	OTHERS
Diagnoses_-_main_ICD10:_M94_Other_disorders_of_cartilage	OTHERS
Diagnoses_-_main_ICD10:_M95_Other_acquired_deformities_of_musculoskeletal_system_and_connective_tissue	OTHERS
Diagnoses_-_main_ICD10:_N02_Recurrent_and_persistent_haematuria	OTHERS
Diagnoses_-_main_ICD10:_N12_Tubulo-interstitial_nephritis__not_specified_as_acute_or_chronic	OTHERS
Diagnoses_-_main_ICD10:_N20_Calculus_of_kidney_and_ureter	OTHERS
Diagnoses_-_main_ICD10:_N21_Calculus_of_lower_urinary_tract	OTHERS
Diagnoses_-_main_ICD10:_N28_Other_disorders_of_kidney_and_ureter__not_elsewhere_classified	OTHERS
Diagnoses_-_main_ICD10:_N30_Cystitis	INFLAMMATORY
Diagnoses_-_main_ICD10:_N36_Other_disorders_of_urethra	OTHERS
Diagnoses_-_main_ICD10:_N40_Hyperplasia_of_prostate	OTHERS
Diagnoses_-_main_ICD10:_N43_Hydrocele_and_spermatocele	MALE
Diagnoses_-_main_ICD10:_N50_Other_disorders_of_male_genital_organs	MALE
Diagnoses_-_main_ICD10:_N60_Benign_mammary_dysplasia	FEMALE
Diagnoses_-_main_ICD10:_N61_Inflammatory_disorders_of_breast	FEMALE
Diagnoses_-_main_ICD10:_N62_Hypertrophy_of_breast	FEMALE
Diagnoses_-_main_ICD10:_N63_Unspecified_lump_in_breast	FEMALE
Diagnoses_-_main_ICD10:_N64_Other_disorders_of_breast	FEMALE
Diagnoses_-_main_ICD10:_N70_Salpingitis_and_oophoritis	FEMALE
Diagnoses_-_main_ICD10:_N71_Inflammatory_disease_of_uterus__except_cervix	FEMALE
Diagnoses_-_main_ICD10:_N72_Inflammatory_disease_of_cervix_uteri	FEMALE
Diagnoses_-_main_ICD10:_N73_Other_female_pelvic_inflammatory_diseases	FEMALE
Diagnoses_-_main_ICD10:_N76_Other_inflammation_of_vagina_and_vulva	FEMALE
Diagnoses_-_main_ICD10:_N82_Fistulae_involving_female_genital_tract	FEMALE
Diagnoses_-_main_ICD10:_N86_Erosion_and_ectropion_of_cervix_uteri	FEMALE
Diagnoses_-_main_ICD10:_N87_Dysplasia_of_cervix_uteri	FEMALE
Diagnoses_-_main_ICD10:_N88_Other_noninflammatory_disorders_of_cervix_uteri	FEMALE
Diagnoses_-_main_ICD10:_N94_Pain_and_other_conditions_associated_with_female_genital_organs_and_menstrual_cycle	FEMALE
Diagnoses_-_main_ICD10:_N97_Female_infertility	FEMALE
Diagnoses_-_main_ICD10:_O02_Other_abnormal_products_of_conception	OTHERS
Diagnoses_-_main_ICD10:_O03_Spontaneous_abortion	FEMALE
Diagnoses_-_main_ICD10:_O14_Gestational_[pregnancy-induced]_hypertension_with_significant_proteinuria	FEMALE
Diagnoses_-_main_ICD10:_O16_Unspecified_maternal_hypertension	FEMALE
Diagnoses_-_main_ICD10:_O21_Excessive_vomiting_in_pregnancy	FEMALE
Diagnoses_-_main_ICD10:_O23_Infections_of_genito-urinary_tract_in_pregnancy	FEMALE
Diagnoses_-_main_ICD10:_O26_Maternal_care_for_other_conditions_predominantly_related_to_pregnancy	FEMALE
Diagnoses_-_main_ICD10:_O32_Maternal_care_for_known_or_suspected_malpresentation_of_foetus	FEMALE
Diagnoses_-_main_ICD10:_O35_Maternal_care_for_known_or_suspected_foetal_abnormality_and_damage	FEMALE
Diagnoses_-_main_ICD10:_O36_Maternal_care_for_other_known_or_suspected_foetal_problems	FEMALE
Diagnoses_-_main_ICD10:_O42_Premature_rupture_of_membranes	FEMALE
Diagnoses_-_main_ICD10:_O44_Placenta_praevia	FEMALE
Diagnoses_-_main_ICD10:_O46_Antepartum_haemorrhage__not_elsewhere_classified	FEMALE
Diagnoses_-_main_ICD10:_O62_Abnormalities_of_forces_of_labour	FEMALE
Diagnoses_-_main_ICD10:_O63_Long_labour	FEMALE
Diagnoses_-_main_ICD10:_O72_Postpartum_haemorrhage	FEMALE
Diagnoses_-_main_ICD10:_O80_Single_spontaneous_delivery	FEMALE
Diagnoses_-_main_ICD10:_O82_Single_delivery_by_Caesarean_section	FEMALE
Diagnoses_-_main_ICD10:_O99_Other_maternal_diseases_classifiable_elsewhere_but_complicating_pregnancy__childbirth_and_the_puerperium	FEMALE
Diagnoses_-_main_ICD10:_Q38_Other_congenital_malformations_of_tongue__mouth_and_pharynx	OTHERS
Diagnoses_-_main_ICD10:_Q66_Congenital_deformities_of_feet	OTHERS
Diagnoses_-_main_ICD10:_R00_Abnormalities_of_heart_beat	CARDIO
Diagnoses_-_main_ICD10:_R05_Cough	OTHERS
Diagnoses_-_main_ICD10:_R06_Abnormalities_of_breathing	RESPIRATORY
Diagnoses_-_main_ICD10:_R09_Other_symptoms_and_signs_involving_the_circulatory_and_respiratory_systems	RESPIRATORY
Diagnoses_-_main_ICD10:_R14_Flatulence_and_related_conditions	OTHERS
Diagnoses_-_main_ICD10:_R17_Unspecified_jaundice	OTHERS
Diagnoses_-_main_ICD10:_R20_Disturbances_of_skin_sensation	NEURO
Diagnoses_-_main_ICD10:_R21_Rash_and_other_nonspecific_skin_eruption	SKIN
Diagnoses_-_main_ICD10:_R23_Other_skin_changes	SKIN
Diagnoses_-_main_ICD10:_R26_Abnormalities_of_gait_and_mobility	OTHERS
Diagnoses_-_main_ICD10:_R29_Other_symptoms_and_signs_involving_the_nervous_and_musculoskeletal_systems	NEURO
Diagnoses_-_main_ICD10:_R32_Unspecified_urinary_incontinence	OTHERS
Diagnoses_-_main_ICD10:_R33_Retention_of_urine	OTHERS
Diagnoses_-_main_ICD10:_R42_Dizziness_and_giddiness	OTHERS
Diagnoses_-_main_ICD10:_R47_Speech_disturbances__not_elsewhere_classified	OTHERS
Diagnoses_-_main_ICD10:_R49_Voice_disturbances	OTHERS
Diagnoses_-_main_ICD10:_R50_Fever_of_unknown_origin	OTHERS
Diagnoses_-_main_ICD10:_R54_Senility	OTHERS
Diagnoses_-_main_ICD10:_R55_Syncope_and_collapse	OTHERS
Diagnoses_-_main_ICD10:_R60_Oedema__not_elsewhere_classified	OTHERS
Diagnoses_-_main_ICD10:_R63_Symptoms_and_signs_concerning_food_and_fluid_intake	OTHERS
Diagnoses_-_main_ICD10:_R73_Elevated_blood_glucose_level	BLOOD
Diagnoses_-_main_ICD10:_R86_Abnormal_findings_in_specimens_from_male_genital_organs	MALE
Diagnoses_-_main_ICD10:_R87_Abnormal_findings_in_specimens_from_female_genital_organs	FEMALE
Diagnoses_-_main_ICD10:_R91_Abnormal_findings_on_diagnostic_imaging_of_lung	RESPIRATORY
Diagnoses_-_main_ICD10:_R93_Abnormal_findings_on_diagnostic_imaging_of_other_body_structures	OTHERS
Diagnoses_-_main_ICD10:_S00_Superficial_injury_of_head	OTHERS
Diagnoses_-_main_ICD10:_S01_Open_wound_of_head	OTHERS
Diagnoses_-_main_ICD10:_S06_Intracranial_injury	OTHERS
Diagnoses_-_main_ICD10:_S09_Other_and_unspecified_injuries_of_head	OTHERS
Diagnoses_-_main_ICD10:_S12_Fracture_of_neck	OTHERS
Diagnoses_-_main_ICD10:_S27_Injury_of_other_and_unspecified_intrathoracic_organs	OTHERS
Diagnoses_-_main_ICD10:_S31_Open_wound_of_abdomen__lower_back_and_pelvis	OTHERS
Diagnoses_-_main_ICD10:_S43_Dislocation__sprain_and_strain_of_joints_and_ligaments_of_shoulder_girdle	OTHERS
Diagnoses_-_main_ICD10:_S46_Injury_of_muscle_and_tendon_at_shoulder_and_upper_arm_level	OTHERS
Diagnoses_-_main_ICD10:_S51_Open_wound_of_forearm	OTHERS
Diagnoses_-_main_ICD10:_S60_Superficial_injury_of_wrist_and_hand	OTHERS
Diagnoses_-_main_ICD10:_S63_Dislocation__sprain_and_strain_of_joints_and_ligaments_at_wrist_and_hand_level	OTHERS
Diagnoses_-_main_ICD10:_S66_Injury_of_muscle_and_tendon_at_wrist_and_hand_level	OTHERS
Diagnoses_-_main_ICD10:_S67_Crushing_injury_of_wrist_and_hand	OTHERS
Diagnoses_-_main_ICD10:_S68_Traumatic_amputation_of_wrist_and_hand	OTHERS
Diagnoses_-_main_ICD10:_S69_Other_and_unspecified_injuries_of_wrist_and_hand	OTHERS
Diagnoses_-_main_ICD10:_S72_Fracture_of_femur	OTHERS
Diagnoses_-_main_ICD10:_S76_Injury_of_muscle_and_tendon_at_hip_and_thigh_level	OTHERS
Diagnoses_-_main_ICD10:_S80_Superficial_injury_of_lower_leg	OTHERS
Diagnoses_-_main_ICD10:_S81_Open_wound_of_lower_leg	OTHERS
Diagnoses_-_main_ICD10:_T14_Injury_of_unspecified_body_region	OTHERS
Diagnoses_-_main_ICD10:_T18_Foreign_body_in_alimentary_tract	OTHERS
Diagnoses_-_main_ICD10:_T78_Adverse_effects__not_elsewhere_classified	OTHERS
Diagnoses_-_main_ICD10:_T79_Certain_early_complications_of_trauma__not_elsewhere_classified	OTHERS
Diagnoses_-_main_ICD10:_T83_Complications_of_genito-urinary_prosthetic_devices__implants_and_grafts	OTHERS
Diagnoses_-_main_ICD10:_T84_Complications_of_internal_orthopaedic_prosthetic_devices__implants_and_grafts	OTHERS
Diagnoses_-_main_ICD10:_T87_Complications_peculiar_to_reattachment_and_amputation	OTHERS
Diagnoses_-_main_ICD10:_T88_Other_complications_of_surgical_and_medical_care__not_elsewhere_classified	OTHERS
Diagnoses_-_main_ICD10:_Z01_Other_special_examinations_and_investigations_of_persons_without_complaint_or_reported_diagnosis	OTHERS
Diagnoses_-_main_ICD10:_Z13_Special_screening_examination_for_other_diseases_and_disorders	OTHERS
Diagnoses_-_main_ICD10:_Z30_Contraceptive_management	OTHERS
Diagnoses_-_main_ICD10:_Z35_Supervision_of_high-risk_pregnancy	OTHERS
Diagnoses_-_main_ICD10:_Z50_Care_involving_use_of_rehabilitation_procedures	OTHERS
Diagnoses_-_main_ICD10:_Z53_Persons_encountering_health_services_for_specifie_procedures__not_carried_out	OTHERS
Diagnoses_-_main_ICD10:_Z85_Personal_history_of_malignant_neoplasm	CANCER
Diagnoses_-_main_ICD10:_Z87_Personal_history_of_other_diseases_and_conditions	OTHERS
Diastolic_blood_pressure__automated_reading	CARDIO
Diffuse_brain_injury	OTHERS
Direct_bilirubin_(umol/L)	BLOOD
Diseases_of_liver	METABOLISM
Diseases_of_peritoneum	OTHERS
Diseases_of_the_blood_and_blood-forming_organs_and_certain_disorders_involving_the_immune_mechanism	IMMUNE
Diseases_of_the_respiratory_system	RESPIRATORY
Diseases_of_the_skin_and_subcutaneous_tissue	SKIN
Diseases_of_veins__lymphatic_vessels_and_lymph_nodes__not_elsewhere_classified	OTHERS
Disorders_of_gallbladder__biliary_tract_and_pancreas	DIGESTIVE
Disorders_of_refraction_and_accommodation	OTHERS
Distance_between_home_and_job_workplace	OTHERS
Divergent_concomitant_strabismus	EYE
Doctor_diagnosed_asthma	RESPIRATORY
Doctor_diagnosed_bronchiectasis	RESPIRATORY
Doctor_diagnosed_chronic_bronchitis	RESPIRATORY
Doctor_diagnosed_emphysema	RESPIRATORY
Doctor_diagnosed_lung_cancer_(not_mesothelioma)	CANCER
Doctor_diagnosed_tuberculosis	IMMUNE
Drive_faster_than_motorway_speed_limit	OTHERS
DVT_of_lower_extremities	OTHERS
Ease_of_skin_tanning	SKIN
Ectropion_of_eyelid	EYE
Endocrine__nutritional_and_metabolic_diseases	HARMONAL
Endometriosis_of_ovary	FEMALE
Energy	OTHERS
Enthesopathies_of_lower_limb__excluding_foot	OTHERS
Entropion_and_trichiasis_of_eyelid	EYE
Eosinophill_count	BLOOD
Eosinophill_percentage	BLOOD
Ever_been_injured_or_injured_someone_else_through_drinking_alcohol:_Yes__during_the_last_year	OTHERS
Ever_believed_in_un-real_communications_or_signs	OTHERS
Ever_had_corneal_graft_surgery:_No	OTHERS
Eye_problems/disorders:_Diabetes_related_eye_disease	EYE
Eye_problems/disorders:_Injury_or_trauma_resulting_in_loss_of_vision	EYE
Eye_problems/disorders:_Macular_degeneration	EYE
Facial_ageing	OTHERS
Fed-up_feelings	OTHERS
Follicular_lymphoma	CANCER
Forced_expiratory_volume_in_1-second_(FEV1)	RESPIRATORY
Forced_expiratory_volume_in_1-second_(FEV1)__Best_measure	RESPIRATORY
Forced_expiratory_volume_in_1-second_(FEV1)__predicted	RESPIRATORY
Forced_expiratory_volume_in_1-second_(FEV1)__predicted_percentage	RESPIRATORY
Forced_vital_capacity_(FVC)	RESPIRATORY
Forced_vital_capacity_(FVC)__Best_measure	RESPIRATORY
Foreign_body_granuloma_of_skin_and_subcutaneous_tissue	SKIN
Fractured_bone_site(s):_Hip	OTHERS
Fractured_bone_site(s):_Leg	OTHERS
Frequency_of_consuming_six_or_more_units_of_alcohol	OTHERS
Frequency_of_needing_morning_drink_of_alcohol_after_heavy_drinking_session_in_last_year	OTHERS
Frequency_of_solarium/sunlamp_use	OTHERS
Frequency_of_tenseness_/_restlessness_in_last_2_weeks	OTHERS
Frequency_of_unenthusiasm_/_disinterest_in_last_2_weeks	OTHERS
Fresh_fruit_intake	OTHERS
Gamma_glutamyltransferase_(U/L)	BLOOD
Gap_coding:_Unable_to_work_due_to_sickness_or_disability	OTHERS
Getting_up_in_morning	OTHERS
Glucose_(mmol/L)	BLOOD
Glycated_haemoglobin_(mmol/mol)	BLOOD
Gout__FINNGEN	OTHERS
Gout__unspecified	OTHERS
Granulomatous_disorders_of_skin_and_subcutaneous_tissue	SKIN
Guillain-Barre_syndrome	IMMUNE
Haematocrit_percentage	BLOOD
Haemoglobin_concentration	BLOOD
Hair/balding_pattern:_Pattern_1	SKIN
Hair/balding_pattern:_Pattern_3	SKIN
Hair/balding_pattern:_Pattern_4	SKIN
Hair_colour_(natural__before_greying):_Black	SKIN
Hair_colour_(natural__before_greying):_Blonde	SKIN
Hair_colour_(natural__before_greying):_Dark_brown	SKIN
Hair_colour_(natural__before_greying):_Light_brown	SKIN
Hair_colour_(natural__before_greying):_Other	SKIN
Hair_colour_(natural__before_greying):_Red	SKIN
Hallux_rigidus	OTHERS
Hand_grip_strength_(left)	OTHERS
Hand_grip_strength_(right)	OTHERS
HDL_cholesterol_(mmol/L)	BLOOD
Hearing_test_done:_I_can_only_hear_on_the_left_side	OTHERS
Hearing_test_done:_I_can_only_hear_on_the_right_side	OTHERS
Hearing_test_done:_Yes	OTHERS
Heart_failure	CARDIO
Heart_failure__not_strict	CARDIO
Heart_failure_strict	CARDIO
Heating_type(s)_in_home:_Solid_fuel_central_heating	OTHERS
Heel_bone_mineral_density_(BMD)	OTHERS
Heel_bone_mineral_density_(BMD)_(left)	OTHERS
Heel_bone_mineral_density_(BMD)_(right)	OTHERS
Heel_bone_mineral_density_(BMD)_T-score__automated	OTHERS
Heel_bone_mineral_density_(BMD)_T-score__automated_(left)	OTHERS
Heel_bone_mineral_density_(BMD)_T-score__automated_(right)	OTHERS
Heel_Broadband_ultrasound_attenuation__direct_entry	OTHERS
Heel_broadband_ultrasound_attenuation_(left)	OTHERS
Heel_broadband_ultrasound_attenuation_(right)	OTHERS
Heel_quantitative_ultrasound_index_(QUI)__direct_entry	OTHERS
Heel_quantitative_ultrasound_index_(QUI)__direct_entry_(left)	OTHERS
Heel_quantitative_ultrasound_index_(QUI)__direct_entry_(right)	OTHERS
Hidradenitis_suppurativa	SKIN
High_light_scatter_reticulocyte_count	BLOOD
High_light_scatter_reticulocyte_percentage	BLOOD
Hip_circumference	ANTHROPOMETRIC
Home_area_population_density_-_urban_or_rural:_Scotland_-_Accessible_Rural	OTHERS
Home_area_population_density_-_urban_or_rural:_Scotland_-_Other_Urban_Area	OTHERS
Hordeolum_and_other_deep_inflammation_of_eyelid	EYE
Hot_drink_temperature	OTHERS
How_are_people_in_household_related_to_participant:_Brother_and/or_sister	OTHERS
How_are_people_in_household_related_to_participant:_Mother_and/or_father	OTHERS
Hydrocephalus	OTHERS
Hypertension	CARDIO
Hypertension_complicating_pregnancy__childbirth__and_the_puerperium	CARDIO
Hypertensive_diseases	CARDIO
Hypothyroidism_(congenital_or_acquired)	HARMONAL
Hypothyroidism_other/unspecified	HARMONAL
Idiopathic_thrombocytopenic_purpura	BLOOD
IGF-1_(nmol/L)	BLOOD
ILD_differential_diagnosis	RESPIRATORY
Illnesses_of_father:_Alzheimer's_disease/dementia	OTHERS
Illnesses_of_mother:_Alzheimer's_disease/dementia	OTHERS
Illnesses_of_mother:_Bowel_cancer	OTHERS
Illnesses_of_mother:_Breast_cancer	OTHERS
Illnesses_of_mother:_High_blood_pressure	OTHERS
Illnesses_of_mother:_Parkinson's_disease	OTHERS
Illnesses_of_siblings:_Diabetes	OTHERS
Illnesses_of_siblings:_Lung_cancer	OTHERS
Illnesses_of_siblings:_Parkinson's_disease	OTHERS
Illnesses_of_siblings:_Stroke	OTHERS
Illness__injury__bereavement__stress_in_last_2_years:_Death_of_a_spouse_or_partner	OTHERS
Illness__injury__bereavement__stress_in_last_2_years:_Marital_separation/divorce	OTHERS
Immature_reticulocyte_fraction	BLOOD
Impacted_cerumen	OTHERS
Impaction_of_intestines	DIGESTIVE
Impedance_of_arm_(left)	OTHERS
Impedance_of_arm_(right)	OTHERS
Impedance_of_leg_(left)	OTHERS
Impedance_of_leg_(right)	OTHERS
Impedance_of_whole_body	OTHERS
Infections_with_a_predominantly_sexual_mode_of_transmission	IMMUNE
Ingrowing_nail	OTHERS
Intestinal_adhesions_without_obstruction	OTHERS
Intracranial_trauma	OTHERS
Intra-ocular_pressure__corneal-compensated_(left)	EYE
Intra-ocular_pressure__corneal-compensated_(right)	EYE
Intra-ocular_pressure__Goldmann-correlated_(left)	EYE
Irritability	OTHERS
Ischaemic_heart_disease__wide_definition	CARDIO
Job_code_-_deduced:_Accounts_and_wages_clerks__book-keepers__other_financial_clerks	OTHERS
Job_code_-_deduced:_Care_assistants_and_home_carers	OTHERS
Job_code_-_deduced:_Civil_Service_administrative_officers_and_assistants	OTHERS
Job_code_-_deduced:_Local_government_clerical_officers_and_assistants	OTHERS
Job_code_-_deduced:_Managers_and_proprietors_in_other_services_n.e.c.	OTHERS
Job_code_-_deduced:_Primary_and_nursery_education_teaching_professionals	OTHERS
Job_code_-_deduced:_Retail_and_wholesale_managers	OTHERS
Job_code_-_deduced:_Vocational_and_industrial_trainers_and_instructors	OTHERS
Job_coding:_actor__chorister_or_singer	OTHERS
Job_coding:_aircraft_engineer	OTHERS
Job_coding:_aircraft_pilot__flight_engineer__aircraft_navigator__helicopter_pilot	OTHERS
Job_coding:_air_travel_assistant__cabin/flight_attendant__air_hostess__air_purser__air_steward__cabin_crew;_passenger_services_agent;_check-in_staff	OTHERS
Job_coding:_architect__landscape_architect/designer__structural_designer	OTHERS
Job_coding:_architectural_technologist/technician/assistant__town_planning_technician__planning_enforcement_officer	OTHERS
Job_coding:_archivist__curator__conservator__inspector_of_ancient_monuments__museum_officer	OTHERS
Job_coding:_arts_officer__producer__director;_entertainment/artists'/theatrical_agent;_studio_manager__prompter	OTHERS
Job_coding:_assembler__machine_operator__foreman	OTHERS
Job_coding:_author__writer__biographer__book_editor__novelist__dramatist__playwright__poet	OTHERS
Job_coding:_baker__confectioner__pastry_cook__cake_decorator	OTHERS
Job_coding:_benefits_advisor__citizens_advice_bureau_adviser__debt_counsellor	OTHERS
Job_coding:_bricklayer	OTHERS
Job_coding:_broadcasting_professional__broadcaster__news_reporter;_radio_or_television_journalist__director_or_producer	OTHERS
Job_coding:_broker__financial/insurance_broker__foreign_exchange_dealer__ship/marine_broker__stockbroker__commodity_trader	OTHERS
Job_coding:_builder__building_contractor	OTHERS
Job_coding:_builder's_labourer__building_worker__hod_carrier	OTHERS
Job_coding:_building_or_civil_engineering_technician__structural_engineering_technician__survey_technician	OTHERS
Job_coding:_building_site_foreman_or_supervisor	OTHERS
Job_coding:_call_centre_operator__sales_order_clerk__telephone_adviser	OTHERS
Job_coding:_care_assistant__home_care_assistant__residential_social_worker__home_carer__nursing_home_assistant	OTHERS
Job_coding:_careers_adviser_or_vocational_guidance_specialist__placement_advisor	OTHERS
Job_coding:_caretaker__janitor__concierge__warden	OTHERS
Job_coding:_carpenter__carpenter_and_joiner__builder's_joiner	OTHERS
Job_coding:_chartered_surveyor__building_surveyor__land_surveyor	OTHERS
Job_coding:_chemical_engineer__plastics_engineer__pharmaceutical_engineer	OTHERS
Job_coding:_childminder__au_pair__children's_nanny	OTHERS
Job_coding:_chiropodist__podiatrist	OTHERS
Job_coding:_civil_engineer	OTHERS
Job_coding:_civil_engineer__transport_engineer__structural_engineer__borough_surveyor	OTHERS
Job_coding:_civil_service_senior_manager_outside_the_senior_civil_service_(former_grades_6_and_7)	OTHERS
Job_coding:_clergyman/woman;_any_religious_officer/leader	OTHERS
Job_coding:_communication/telecommunications_operator__radio/telex_operator__radar_operator	OTHERS
Job_coding:_community_worker__day_centre_officer__youth_leader__youth_worker__parish_worker__bail_support_officer	OTHERS
Job_coding:_company_secretary__club_secretary	OTHERS
Job_coding:_computer_engineer__computer_service_or_maintenance_technician	OTHERS
Job_coding:_credit_controller/supervisor	OTHERS
Job_coding:_customer_care_adviser/officer/assistant__store_guide__customer_relations_officer/representative	OTHERS
Job_coding:_customer_care/relations_manager__help_desk_manager	OTHERS
Job_coding:_day_nursery_manager_or_owner	OTHERS
Job_coding:_dental_nurse_or_assistant	OTHERS
Job_coding:_dentist__dental_surgeon__orthodontist__periodontist	OTHERS
Job_coding:_draughtsperson__cartographer__designer-detailer/draughtsperson__drawing_office_checker__engineering_draughtsperson	OTHERS
Job_coding:_electrical/electronics_technician	OTHERS
Job_coding:_electrical_engineer__generating_engineer__power_engineer__power_transmission_engineer	OTHERS
Job_coding:_electrical_or_electronics_technician__signals_officer	OTHERS
Job_coding:_electrician__electrical_fitter	OTHERS
Job_coding:_electronic_engineer_(maintenance)__alarm_engineer__office_equipment_engineer	OTHERS
Job_coding:_electronics_engineer__broadcasting_engineer__microwave_engineer__radar_engineer__radio_engineer	OTHERS
Job_coding:_emergency_services_control_room/radio_operator/officer	OTHERS
Job_coding:_estate_agent__auctioneer__land_agent__letting_agent	OTHERS
Job_coding:_estimator__valuer__building_estimator/assessor__insurance_assessor__costing_engineer__surveyor/valuer__lottery_officer__rating_officer__marine/naval_surveyor	OTHERS
Job_coding:_filing_clerk__records_assistant/clerk	OTHERS
Job_coding:_financial_controller__accounting/audit_technician__trust_officer	OTHERS
Job_coding:_financial_services_manager__chartered_secretary__banker__merchant_or_investment_banker__finance_director__tax_manager	OTHERS
Job_coding:_gardener__groundsman/groundswoman__park_keeper__landscape_gardener__greenkeeper__turf_cutter	OTHERS
Job_coding:_hairdresser__barber__shampooist__hair_stylist	OTHERS
Job_coding:_hairdressing_or_beauty_salon_manager_or_proprietor/owner	OTHERS
Job_coding:_health_and_safety_officer__occupational_hygienist__safety_adviser	OTHERS
Job_coding:_healthcare_practice_manager__dental_practice_manager__chiropody_practice_manager/owner	OTHERS
Job_coding:_health_visitor	OTHERS
Job_coding:_heavy_goods_vehicle_(hgv)_driver__lorry_or_truck_driver__tanker_driver__haulage_driver	OTHERS
Job_coding:_hospital_manager__health_service_manager__clinical_manager__nursing_service_manager	OTHERS
Job_coding:_hotel_or_guesthouse_owner/manager;_hostel_warden__holiday_camp_manager__caravan/camping_site_owner/manager	OTHERS
Job_coding:_housekeeper__butler__valet__cook-housekeeper__companion-housekeeper	OTHERS
Job_coding:_houseparent__child_careworker__residential_warden__sheltered_accommodation_warden__foster_parent	OTHERS
Job_coding:_ict_or_it_manager__systems/data_processing_manager__telecom_manager	OTHERS
Job_coding:_import_agent__export_agent__shipping_agent	OTHERS
Job_coding:_insurance_underwriter__insurance_inspector__insurance_account_handler	OTHERS
Job_coding:_it_operations_technician__computer_operator_or_technician__database_manager__network_or_web_technician__web_master__systems_administrator_or_officer	OTHERS
Job_coding:_it_user_support_technician__help_desk_or_helpline_operator_(computing)__support_technician_(computing)__systems_support_officer	OTHERS
Job_coding:_journalist__reporter__newspaper_correspondent__sports_writer__newspaper_or_magazine_editor	OTHERS
Job_coding:_laboratory_technician	OTHERS
Job_coding:_librarian__assistant_librarian	OTHERS
Job_coding:_library_assistant/clerk	OTHERS
Job_coding:_library_assistant/clerk__press_cuttings_clerk	OTHERS
Job_coding:_machine_operator__plastics_moulder__foreman	OTHERS
Job_coding:_machine_operator__processor__foreman	OTHERS
Job_coding:_management_accountant__works_accountant__cost_accountant	OTHERS
Job_coding:_management_consultant__actuary__economist__statistician__statistical_controller/assistant__business_analyst__demographer__economic_forecaster	OTHERS
Job_coding:_manager_in_construction__clerk_of_works__site_manager__contracts_manager__highways_manager	OTHERS
Job_coding:_manager_of_theatre__cinema__museum	OTHERS
Job_coding:_mechanical_engineer	OTHERS
Job_coding:_medical_radiographer__x-ray_operator__sonographer	OTHERS
Job_coding:_medical_secretary	OTHERS
Job_coding:_medical_technician__audiologist__cardiographer__prosthesist__ecg_technician__eeg_technician	OTHERS
Job_coding:_metal_making_or_metal_treating_process_worker__machine_operator__furnaceman	OTHERS
Job_coding:_metal_plate_worker__boilermaker__plater-welder__caulker-burner__shipwright__riveter	OTHERS
Job_coding:_metal_working_production_or_maintenance_fitter__machine_fitter__fitter_and_turner__bench_fitter__plant_fitter	OTHERS
Job_coding:_motor_mechanic__diesel_fitter__auto_engineer	OTHERS
Job_coding:_motor_vehicle/industrial_machinery_fitter	OTHERS
Job_coding:_musician__bandsman__instrumentalist__bellringer;_composer__conductor;_song_writer	OTHERS
Job_coding:_nurseryman__market_gardener__horticulturist	OTHERS
Job_coding:_office_manager__account/payrolls_manager__administration_manager__litigation/solicitor's_office_manager	OTHERS
Job_coding:_other_assembler__routine_operative	OTHERS
Job_coding:_other_electrical_or_electronics_technician__including_alarm_engineer__office_machinery_engineer_or_mechanic	OTHERS
Job_coding:_other_researchers_including_in_broadcasting__journalism__photography__printing_and_publishing	OTHERS
Job_coding:_other_sales_occupations_including_bill_poster__ticket_checker	OTHERS
Job_coding:_other_science_technician__materials_technician__technical_assistant__technical_officer	OTHERS
Job_coding:_other_work_in_this_industry:_factory_hand__mate__assistant__handler__loader	OTHERS
Job_coding:_other_work_in_this_industry:_factory_hand__mate__assistant__handler__loader__finisher	OTHERS
Job_coding:_packer__bottler__canner__filler__wrapper__foreman	OTHERS
Job_coding:_painter__decorator	OTHERS
Job_coding:_personnel__human_resources__training_or_industrial_relations_manager/director__recruitment_manager/director	OTHERS
Job_coding:_personnel_or_industrial_relations_officer__recruitment_consultant	OTHERS
Job_coding:_pharmaceutical_dispenser__pharmacy_technician	OTHERS
Job_coding:_pharmacist__pharmacologist__pharmaceutical_chemist	OTHERS
Job_coding:_physicist__astronomer__geologist__geophysicist__meteorologist__oceanographer__seismologist	OTHERS
Job_coding:_physiotherapist	OTHERS
Job_coding:_pipe_fitter	OTHERS
Job_coding:_planning_and_quality_control_engineer__industrial_engineer__quality_engineer	OTHERS
Job_coding:_playgroup_or_playschool_leader_or_assistant	OTHERS
Job_coding:_plumber	OTHERS
Job_coding:_postal_worker__postman__mail_sorter__messenger__courier__mailroom_clerk__post_sorter__leaflet/circular_distributor__newspaper/parcel_deliverer	OTHERS
Job_coding:_printer__master_printer	OTHERS
Job_coding:_printing_machine_operator__printer's_assistant	OTHERS
Job_coding:_prison_service_officer_(below_principal_officer)__prison_warder	OTHERS
Job_coding:_property/housing/land_manager	OTHERS
Job_coding:_psychologist__psychometrist	OTHERS
Job_coding:_public_relations_officer__press_officer__information_officer__publicity_assistant	OTHERS
Job_coding:_purchasing_manager/director_(not_retail)__supplies_manager	OTHERS
Job_coding:_quality_assurance_technician/co-ordinator	OTHERS
Job_coding:_quantity_surveyor__quantity_survey_technician	OTHERS
Job_coding:_receptionist__doctor's/dental_receptionist	OTHERS
Job_coding:_research_and_development_manager	OTHERS
Job_coding:_researcher_in_broadcasting__journalism__photography__printing_and_publishing	OTHERS
Job_coding:_residential_manager__day_care_manager__nursing_home_manager__retirement_home_manager__convalescent_home_manager	OTHERS
Job_coding:_restaurant_or_catering_manager__restaurateur;_canteen_manager;_takeaway_food_shop_manager	OTHERS
Job_coding:_retail_or_wholesale_shop_manager__showroom_manager	OTHERS
Job_coding:_retail/shop_cashier__check-out_operator__petrol_station_attendant__restaurant_cashier	OTHERS
Job_coding:_river/water_surveyor__surveyor_and_estimator__topographer__property_surveyor	OTHERS
Job_coding:_roundsman_or_woman__van_salesperson__ice_cream_seller__milkman__mobile_shop_salesperson	OTHERS
Job_coding:_sales_or_marketing_representative__manufacturer's_agent_or_representative_or_salesman/woman	OTHERS
Job_coding:_sales_room_assistant__wine_merchant's_cellar_man;_order/stock_filler__stock/store_keeper;_lorry/warehouse_loader/checker/weigher__goods_porter__customs_attendant	OTHERS
Job_coding:_school_inspector__education_inspector	OTHERS
Job_coding:_school_secretary	OTHERS
Job_coding:_school_secretary__clerical_assistant__school_registry_assistant	OTHERS
Job_coding:_school/student_counsellor__school_attendance_officer	OTHERS
Job_coding:_secondary_school_teacher_or_teaching_professional_(including_head_teacher)	OTHERS
Job_coding:_security_guard/officer__night_watchman__store_detective__private_detective__bodyguard__gateman__door_keeper__cctv_operator__patrolman	OTHERS
Job_coding:_senior_officer_in_fire_service_including_captain__commander__controller__firemaster__inspector__salvage_officer__station_officer__superintendent	OTHERS
Job_coding:_senior_official_in_central_government_including_members_of_the_senior_civil_service_and_the_equivalent_in_the_diplomatic_service__mps__meps	OTHERS
Job_coding:_senior_official_in_local_government_including_parish_or_town_or_county_chief_clerk__chief_or_superintendent_rate_collector__chief_executive_or_director__councillor	OTHERS
Job_coding:_senior_official_of_special_interest_organisation_including_general_manager_or_director_or_executive_or_general_secretary_of_charity__or_trade_union/association_or_religious_organisation	OTHERS
Job_coding:_sewing_machinist	OTHERS
Job_coding:_sheet_metal_worker__panel_beater__metal_finisher__coppersmith	OTHERS
Job_coding:_ship__merchant_navy_or_hovercraft_captain/officer/navigator__master_mariner__skipper	OTHERS
Job_coding:_ship's_engineer__ship's_purser	OTHERS
Job_coding:_shopkeeper__shop_owner__newsagent__wholesale/retail_dealer	OTHERS
Job_coding:_social_science_researcher__anthropologist__sociologist__archaeologist__behavioural_scientist__epidemiologist__government_survey_officer	OTHERS
Job_coding:_special_needs_teaching_professional_(including_head_teacher)	OTHERS
Job_coding:_speech_and_language_therapist	OTHERS
Job_coding:_sports_coach__instructor__trainer__or_manager	OTHERS
Job_coding:_stock_control_clerk__stock_controller__progress/production/stock_chaser__warehouse_clerk__materials_controller/co-ordinator__stores_officer	OTHERS
Job_coding:_storage_manager__stock_control_manager__container_terminal_manager	OTHERS
Job_coding:_stores/warehouse_porter	OTHERS
Job_coding:_taxation_accountant_or_adviser_or_consultant_or_practitioner	OTHERS
Job_coding:_taxi_or_cab_driver__chauffeur__hearse_driver	OTHERS
Job_coding:_telecommunication_engineer__telephone_engineer__telephone_technician	OTHERS
Job_coding:_telephonist__telephone/switchboard_operator	OTHERS
Job_coding:_television__video__audio_or_radio_engineer/repairer/installer/technician	OTHERS
Job_coding:_textile_machine_operator__assembler__spinner__foreman	OTHERS
Job_coding:_tool_maker__tool_fitter__jig_and_tool_fitter__marker_out__die_sinker	OTHERS
Job_coding:_town_planner__development_officer	OTHERS
Job_coding:_travel_agency_manager/owner__tourist_manager	OTHERS
Job_coding:_travel_agent__travel_agency/booking/reservations_clerk__tour_organiser	OTHERS
Job_coding:_travel/tour_guide	OTHERS
Job_coding:_typist__shorthand_typist__transcriber__stenographer	OTHERS
Job_coding:_university_lecturer/professor	OTHERS
Job_coding:_van_driver__delivery_driver__courier_driver	OTHERS
Job_coding:_vocational_or_industrial_trainer/instructor	OTHERS
Job_coding:_welder__fitter-welder	OTHERS
Job_SOC_coding:_Actors__entertainers	OTHERS
Job_SOC_coding:_Aircraft_pilots_and_flight_engineers	OTHERS
Job_SOC_coding:_Air_travel_assistants	OTHERS
Job_SOC_coding:_Architects	OTHERS
Job_SOC_coding:_Architectural_technologists_and_town_planning_technicians	OTHERS
Job_SOC_coding:_Archivists_and_curators	OTHERS
Job_SOC_coding:_Arts_officers__producers_and_directors	OTHERS
Job_SOC_coding:_Authors__writers	OTHERS
Job_SOC_coding:_Bakers__flour_confectioners	OTHERS
Job_SOC_coding:_Bricklayers__masons	OTHERS
Job_SOC_coding:_Broadcasting_associate_professionals	OTHERS
Job_SOC_coding:_Building_and_civil_engineering_technicians	OTHERS
Job_SOC_coding:_Call_centre_agents/operators	OTHERS
Job_SOC_coding:_Care_assistants_and_home_carers	OTHERS
Job_SOC_coding:_Careers_advisers_and_vocational_guidance_specialists	OTHERS
Job_SOC_coding:_Caretakers	OTHERS
Job_SOC_coding:_Carpenters_and_joiners	OTHERS
Job_SOC_coding:_Chefs__cooks	OTHERS
Job_SOC_coding:_Chemical_and_related_process_operatives	OTHERS
Job_SOC_coding:_Childminders_and_related_occupations	OTHERS
Job_SOC_coding:_Chiropodists	OTHERS
Job_SOC_coding:_Clergy	OTHERS
Job_SOC_coding:_Communication_operators	OTHERS
Job_SOC_coding:_Company_secretaries	OTHERS
Job_SOC_coding:_Construction_operatives_n.e.c.	OTHERS
Job_SOC_coding:_Credit_controllers	OTHERS
Job_SOC_coding:_Customer_care_managers	OTHERS
Job_SOC_coding:_Dental_nurses	OTHERS
Job_SOC_coding:_Dental_practitioners	OTHERS
Job_SOC_coding:_Draughtspersons	OTHERS
Job_SOC_coding:_Electrical/electronics_engineers_n.e.c.	OTHERS
Job_SOC_coding:_Electrical/electronics_technicians	OTHERS
Job_SOC_coding:_Electronics_engineers	OTHERS
Job_SOC_coding:_Elementary_personal_services_occupations_n.e.c.	OTHERS
Job_SOC_coding:_Elementary_sales_occupations_n.e.c.	OTHERS
Job_SOC_coding:_Energy_plant_operatives	OTHERS
Job_SOC_coding:_Estate_agents__auctioneers	OTHERS
Job_SOC_coding:_Estimators__valuers_and_assessors	OTHERS
Job_SOC_coding:_Farm_managers	OTHERS
Job_SOC_coding:_Financial_and_accounting_technicians	OTHERS
Job_SOC_coding:_Financial_managers_and_chartered_secretaries	OTHERS
Job_SOC_coding:_Fishing_and_agriculture_related_occupations_n.e.c.	OTHERS
Job_SOC_coding:_Food__drink_and_tobacco_process_operatives	OTHERS
Job_SOC_coding:_Gardeners_and_groundsmen/groundswomen	OTHERS
Job_SOC_coding:_Hairdressing_and_beauty_salon_managers_and_proprietors	OTHERS
Job_SOC_coding:_Healthcare_practice_managers	OTHERS
Job_SOC_coding:_Heavy_goods_vehicle_drivers	OTHERS
Job_SOC_coding:_Horticultural_trades	OTHERS
Job_SOC_coding:_Hospital_and_health_service_managers	OTHERS
Job_SOC_coding:_Hospital_porters	OTHERS
Job_SOC_coding:_Hotel_and_accommodation_managers	OTHERS
Job_SOC_coding:_Housekeepers_and_related_occupations	OTHERS
Job_SOC_coding:_Houseparents_and_residential_wardens	OTHERS
Job_SOC_coding:_Importers__exporters	OTHERS
Job_SOC_coding:_Information_and_communication_technology_managers	OTHERS
Job_SOC_coding:_IT_operations_technicians	OTHERS
Job_SOC_coding:_IT_user_support_technicians	OTHERS
Job_SOC_coding:_Journalists__newspaper_and_periodical_editors	OTHERS
Job_SOC_coding:_Labourers_in_building_and_woodworking_trades	OTHERS
Job_SOC_coding:_Leisure_and_travel_service_occupations_n.e.c.	OTHERS
Job_SOC_coding:_Library_assistants/clerks	OTHERS
Job_SOC_coding:_Management_accountants	OTHERS
Job_SOC_coding:_Management_consultants__actuaries__economists_and_statisticians	OTHERS
Job_SOC_coding:_Managers_in_construction	OTHERS
Job_SOC_coding:_Medical_and_dental_technicians	OTHERS
Job_SOC_coding:_Medical_radiographers	OTHERS
Job_SOC_coding:_Metal_making_and_treating_process_operatives	OTHERS
Job_SOC_coding:_Metal_plate_workers__shipwrights__riveters	OTHERS
Job_SOC_coding:_Metal_working_production_and_maintenance_fitters	OTHERS
Job_SOC_coding:_Motor_mechanics__auto_engineers	OTHERS
Job_SOC_coding:_Musicians	OTHERS
Job_SOC_coding:_Occupational_hygienists_and_safety_officers_(health_and_safety)	OTHERS
Job_SOC_coding:_Office_managers	OTHERS
Job_SOC_coding:_Packers__bottlers__canners__fillers	OTHERS
Job_SOC_coding:_Paper_and_wood_machine_operatives	OTHERS
Job_SOC_coding:_Personnel_and_industrial_relations_officers	OTHERS
Job_SOC_coding:_Personnel__training_and_industrial_relations_managers	OTHERS
Job_SOC_coding:_Pharmaceutical_dispensers	OTHERS
Job_SOC_coding:_Pharmacists/pharmacologists	OTHERS
Job_SOC_coding:_Photographers_and_audio-visual_equipment_operators	OTHERS
Job_SOC_coding:_Physicists__geologists_and_meteorologists	OTHERS
Job_SOC_coding:_Physiotherapists	OTHERS
Job_SOC_coding:_Pipe_fitters	OTHERS
Job_SOC_coding:_Planning_and_quality_control_engineers	OTHERS
Job_SOC_coding:_Plastics_process_operatives	OTHERS
Job_SOC_coding:_Playgroup_leaders/assistants	OTHERS
Job_SOC_coding:_Plumbers__heating_and_ventilating_engineers	OTHERS
Job_SOC_coding:_Postal_workers__mail_sorters__messengers__couriers	OTHERS
Job_SOC_coding:_Printers	OTHERS
Job_SOC_coding:_Printing_machine_minders_and_assistants	OTHERS
Job_SOC_coding:_Prison_service_officers_(below_principal_officer)	OTHERS
Job_SOC_coding:_Property__housing_and_land_managers	OTHERS
Job_SOC_coding:_Protective_service_associate_professionals_n.e.c.	OTHERS
Job_SOC_coding:_Psychologists	OTHERS
Job_SOC_coding:_Public_relations_officers	OTHERS
Job_SOC_coding:_Public_service_administrative_professionals	OTHERS
Job_SOC_coding:_Purchasing_managers	OTHERS
Job_SOC_coding:_Quality_assurance_technicians	OTHERS
Job_SOC_coding:_Quantity_surveyors	OTHERS
Job_SOC_coding:_Rail_transport_operatives	OTHERS
Job_SOC_coding:_Residential_and_day_care_managers	OTHERS
Job_SOC_coding:_Restaurant_and_catering_managers	OTHERS
Job_SOC_coding:_Retail_and_wholesale_managers	OTHERS
Job_SOC_coding:_Retail_cashiers_and_check-out_operators	OTHERS
Job_SOC_coding:_Roundsmen/women_and_van_salespersons	OTHERS
Job_SOC_coding:_Routine_inspectors_and_testers	OTHERS
Job_SOC_coding:_Sales_representatives	OTHERS
Job_SOC_coding:_School_secretaries	OTHERS
Job_SOC_coding:_Science_and_engineering_technicians_n.e.c.	OTHERS
Job_SOC_coding:_Security_guards_and_related_occupations	OTHERS
Job_SOC_coding:_Senior_officers_in_fire__ambulance__prison_and_related_services	OTHERS
Job_SOC_coding:_Senior_officials_in_local_government	OTHERS
Job_SOC_coding:_Senior_officials_in_national_government	OTHERS
Job_SOC_coding:_Senior_officials_of_special_interest_organisations	OTHERS
Job_SOC_coding:_Sewing_machinists	OTHERS
Job_SOC_coding:_Sheet_metal_workers	OTHERS
Job_SOC_coding:_Ship_and_hovercraft_officers	OTHERS
Job_SOC_coding:_Shopkeepers_and_wholesale/retail_dealers	OTHERS
Job_SOC_coding:_Social_science_researchers	OTHERS
Job_SOC_coding:_Special_needs_education_teaching_professionals	OTHERS
Job_SOC_coding:_Speech_and_language_therapists	OTHERS
Job_SOC_coding:_Sports_and_leisure_assistants	OTHERS
Job_SOC_coding:_Sports_coaches__instructors_and_officials	OTHERS
Job_SOC_coding:_Stock_control_clerks	OTHERS
Job_SOC_coding:_Storage_and_warehouse_managers	OTHERS
Job_SOC_coding:_Taxation_experts	OTHERS
Job_SOC_coding:_Taxi__cab_drivers_and_chauffeurs	OTHERS
Job_SOC_coding:_Telecommunications_engineers	OTHERS
Job_SOC_coding:_Telephonists	OTHERS
Job_SOC_coding:_Textile_process_operatives	OTHERS
Job_SOC_coding:_Tool_makers__tool_fitters_and_markers-out	OTHERS
Job_SOC_coding:_Town_planners	OTHERS
Job_SOC_coding:_Travel_agency_managers	OTHERS
Job_SOC_coding:_Travel_agents	OTHERS
Job_SOC_coding:_Travel_and_tour_guides	OTHERS
Job_SOC_coding:_TV__video_and_audio_engineers	OTHERS
Job_SOC_coding:_Typists	OTHERS
Job_SOC_coding:_Van_drivers	OTHERS
Job_SOC_coding:_Veterinarians	OTHERS
Job_SOC_coding:_Vocational_and_industrial_trainers_and_instructors	OTHERS
Job_SOC_coding:_Welding_trades	OTHERS
Job_SOC_coding:_Youth_and_community_workers	OTHERS
Lamb/mutton_intake	OTHERS
LDL_direct_(mmol/L)	BLOOD
Leg_fat-free_mass_(left)	ANTHROPOMETRIC
Leg_fat-free_mass_(right)	ANTHROPOMETRIC
Leg_fat_mass_(left)	ANTHROPOMETRIC
Leg_fat_mass_(right)	ANTHROPOMETRIC
Leg_fat_percentage_(left)	ANTHROPOMETRIC
Leg_fat_percentage_(right)	ANTHROPOMETRIC
Leg_predicted_mass_(left)	ANTHROPOMETRIC
Leg_predicted_mass_(right)	ANTHROPOMETRIC
Length_of_time_at_current_address	OTHERS
Lesion_of_ulnar_nerve	NEURO
Lichen_simplex_chronicus_and_prurigo	SKIN
Lifetime_number_of_sexual_partners	OTHERS
Lipoprotein_A_(nmol/L)	BLOOD
Longest_period_of_unenthusiasm_/_disinterest	OTHERS
Long-standing_illness__disability_or_infirmity	OTHERS
Loose_body_in_joint	OTHERS
Low_calorie_drink_intake	OTHERS
Lymphocyte_count	BLOOD
Lymphocyte_percentage	BLOOD
Major_coronary_heart_disease_event	CARDIO
Major_coronary_heart_disease_event_excluding_revascularizations	CARDIO
Major_dietary_changes_in_the_last_5_years:_No	OTHERS
Major_dietary_changes_in_the_last_5_years:_Yes__because_of_illness	OTHERS
Malignant_melanoma_of_skin	CANCER
Malignant_neoplasm_of_bladder	CANCER
Malignant_neoplasm_of_brain	CANCER
Malignant_neoplasm_of_breast	CANCER
Malignant_neoplasm_of_bronchus_and_lung	CANCER
Malignant_neoplasm_of_cervix_uteri	CANCER
Malignant_neoplasm_of_colon	CANCER
Malignant_neoplasm_of_endocrine_gland	CANCER
Malignant_neoplasm_of_eye_and_adnexa	CANCER
Malignant_neoplasm_of_eye__brain_and_central_nervous_system	CANCER
Malignant_neoplasm_of_kidney__except_renal_pelvis	CANCER
Malignant_neoplasm_of_other_and_unspecified_parts_of_tongue	CANCER
Malignant_neoplasm_of_other_connective_and_soft_tissue	CANCER
Malignant_neoplasm_of_pancreas	CANCER
Malignant_neoplasm_of_rectosigmoid_junction	CANCER
Malignant_neoplasm_of_skin	CANCER
Malignant_neoplasm_of_small_intestine	CANCER
Malignant_neoplasm_of_thyroid_gland	CANCER
Malignant_neoplasm_of_tonsil	CANCER
Malignant_neoplasm_of_urinary_organs	CANCER
Manifestations_of_mania_or_irritability:_I_was_more_confident_than_usual	OTHERS
Mature_T/NK-cell_lymphomas	CANCER
Mean_corpuscular_haemoglobin	BLOOD
Mean_corpuscular_haemoglobin_concentration	BLOOD
Mean_corpuscular_volume	BLOOD
Mean_platelet_(thrombocyte)_volume	BLOOD
Mean_reticulocyte_volume	BLOOD
Mean_signal-to-noise_ratio_(SNR)__(left)	OTHERS
Mean_sphered_cell_volume	BLOOD
Medial_epicondylitis	OTHERS
Medication_for_cholesterol__blood_pressure__diabetes__or_take_exogenous_hormones:_Blood_pressure_medication	OTHERS
Medication_for_cholesterol__blood_pressure__diabetes__or_take_exogenous_hormones:_Insulin	OTHERS
Medication_for_cholesterol__blood_pressure_or_diabetes:_Blood_pressure_medication	OTHERS
Medication_for_cholesterol__blood_pressure_or_diabetes:_Cholesterol_lowering_medication	OTHERS
Medication_for_cholesterol__blood_pressure_or_diabetes:_Insulin	OTHERS
Medication_for_cholesterol__blood_pressure_or_diabetes:_None_of_the_above	OTHERS
Medication_for_pain_relief__constipation__heartburn:_None_of_the_above	OTHERS
Medication_for_pain_relief__constipation__heartburn:_Paracetamol	OTHERS
Memory_loss	OTHERS
Meningitis	INFLAMMATORY
Mental_and_behavioural_disorders	OTHERS
Mental_health_problems_ever_diagnosed_by_a_professional:_Agoraphobia	OTHERS
Mental_health_problems_ever_diagnosed_by_a_professional:_Any_other_type_of_psychosis_or_psychotic_illness	OTHERS
Mental_health_problems_ever_diagnosed_by_a_professional:_A_personality_disorder	OTHERS
Mental_health_problems_ever_diagnosed_by_a_professional:_Bulimia_nervosa	OTHERS
Mental_health_problems_ever_diagnosed_by_a_professional:_Social_anxiety_or_social_phobia	OTHERS
Metatarsalgia	OTHERS
Methods_of_self-harm_used:_Ingesting_a_medication_in_excess_of_the_normal_dose	OTHERS
Methods_of_self-harm_used:_Self-injury_such_as_self-cutting__scratching_or_hitting__etc.	OTHERS
Methods_of_self-harm_used:_Something_not_listed	OTHERS
Methods_of_self-harm_used:_Stopping_prescribed_medication	OTHERS
Microalbumin_in_urine	OTHERS
Milk_intake	OTHERS
Milk_type_used:_Other_type_of_milk	OTHERS
Miserableness	OTHERS
Monocyte_count	BLOOD
Monocyte_percentage	BLOOD
Mood_swings	OTHERS
Morning/evening_person_(chronotype)	OTHERS
Mouth/teeth_dental_problems:_Dentures	TEETH
Mouth/teeth_dental_problems:_Mouth_ulcers	TEETH
Myalgia	OTHERS
Myeloid_leukaemia	CANCER
Myocardial_infarction	CARDIO
Myocardial_infarction__strict	CARDIO
NA	OTHERS
Nail_disorders	SKIN
Nap_during_day	OTHERS
Nervous_feelings	OTHERS
Neuroticism_score	OTHERS
Neutrophill_count	BLOOD
Neutrophill_percentage	BLOOD
Never_eat_eggs__dairy__wheat__sugar:_I_eat_all_of_the_above	OTHERS
Never_eat_eggs__dairy__wheat__sugar:_Wheat_products	OTHERS
Nonalcoholic_fatty_liver_disease	OTHERS
Non-butter_spread_type_details:_Hard_(block)_margarine	OTHERS
Non-cancer_illness_code__self-reported:_abdominal_hernia	OTHERS
Non-cancer_illness_code__self-reported:_acne/acne_vulgaris	OTHERS
Non-cancer_illness_code__self-reported:_acute_infective_polyneuritis/guillain-barre_syndrome	OTHERS
Non-cancer_illness_code__self-reported:_adrenocortical_insufficiency/addison's_disease	OTHERS
Non-cancer_illness_code__self-reported:_allergy_to_house_dust_mite	OTHERS
Non-cancer_illness_code__self-reported:_anaemia	OTHERS
Non-cancer_illness_code__self-reported:_anal_fissure	OTHERS
Non-cancer_illness_code__self-reported:_ankylosing_spondylitis	OTHERS
Non-cancer_illness_code__self-reported:_appendicitis	OTHERS
Non-cancer_illness_code__self-reported:_arthritis_(nos)	OTHERS
Non-cancer_illness_code__self-reported:_asthma	OTHERS
Non-cancer_illness_code__self-reported:_atrial_fibrillation	OTHERS
Non-cancer_illness_code__self-reported:_bell's_palsy/facial_nerve_palsy	OTHERS
Non-cancer_illness_code__self-reported:_benign_/_essential_tremor	OTHERS
Non-cancer_illness_code__self-reported:_benign_neuroma	OTHERS
Non-cancer_illness_code__self-reported:_bone_disorder	OTHERS
Non-cancer_illness_code__self-reported:_bowel_/_intestinal_obstruction	OTHERS
Non-cancer_illness_code__self-reported:_brain_haemorrhage	OTHERS
Non-cancer_illness_code__self-reported:_bronchitis	OTHERS
Non-cancer_illness_code__self-reported:_burns	OTHERS
Non-cancer_illness_code__self-reported:_carpal_tunnel_syndrome	OTHERS
Non-cancer_illness_code__self-reported:_cerebral_aneurysm	OTHERS
Non-cancer_illness_code__self-reported:_cervical_spondylosis	OTHERS
Non-cancer_illness_code__self-reported:_chickenpox	OTHERS
Non-cancer_illness_code__self-reported:_cholecystitis	OTHERS
Non-cancer_illness_code__self-reported:_cholelithiasis/gall_stones	OTHERS
Non-cancer_illness_code__self-reported:_chronic/degenerative_neurological_problem	OTHERS
Non-cancer_illness_code__self-reported:_chronic_fatigue_syndrome	OTHERS
Non-cancer_illness_code__self-reported:_chronic_sinusitis	OTHERS
Non-cancer_illness_code__self-reported:_colitis/not_crohns_or_ulcerative_colitis	OTHERS
Non-cancer_illness_code__self-reported:_cranial_nerve_problem/palsy	OTHERS
Non-cancer_illness_code__self-reported:_deliberate_self-harm/suicide_attempt	OTHERS
Non-cancer_illness_code__self-reported:_diabetes	OTHERS
Non-cancer_illness_code__self-reported:_diabetic_neuropathy/ulcers	OTHERS
Non-cancer_illness_code__self-reported:_dry_eyes	OTHERS
Non-cancer_illness_code__self-reported:_dupuytren's_contracture	OTHERS
Non-cancer_illness_code__self-reported:_dyspepsia_/_indigestion	OTHERS
Non-cancer_illness_code__self-reported:_encephalitis	OTHERS
Non-cancer_illness_code__self-reported:_eye/eyelid_problem	OTHERS
Non-cancer_illness_code__self-reported:_eye_infection	OTHERS
Non-cancer_illness_code__self-reported:_femoral_hernia	OTHERS
Non-cancer_illness_code__self-reported:_food_intolerance	OTHERS
Non-cancer_illness_code__self-reported:_fracture_face_/_orbit_/_eye_socket	OTHERS
Non-cancer_illness_code__self-reported:_fracture_finger	OTHERS
Non-cancer_illness_code__self-reported:_fracture_foot	OTHERS
Non-cancer_illness_code__self-reported:_fracture_forearm_/_wrist	OTHERS
Non-cancer_illness_code__self-reported:_fracture_jaw	OTHERS
Non-cancer_illness_code__self-reported:_fracture_metatarsal	OTHERS
Non-cancer_illness_code__self-reported:_fracture_neck_of_femur_/_hip	OTHERS
Non-cancer_illness_code__self-reported:_fracture_pelvis	OTHERS
Non-cancer_illness_code__self-reported:_fracture_radius	OTHERS
Non-cancer_illness_code__self-reported:_fracture_rib	OTHERS
Non-cancer_illness_code__self-reported:_fracture_shaft_of_femur	OTHERS
Non-cancer_illness_code__self-reported:_fracture_shoulder_/_scapula	OTHERS
Non-cancer_illness_code__self-reported:_fracture_skull_/_head	OTHERS
Non-cancer_illness_code__self-reported:_fracture_ulna	OTHERS
Non-cancer_illness_code__self-reported:_gastritis/gastric_erosions	OTHERS
Non-cancer_illness_code__self-reported:_gastroenteritis/dysentry	OTHERS
Non-cancer_illness_code__self-reported:_gastrointestinal_bleeding	OTHERS
Non-cancer_illness_code__self-reported:_headaches_(not_migraine)	OTHERS
Non-cancer_illness_code__self-reported:_heart_arrhythmia	OTHERS
Non-cancer_illness_code__self-reported:_heart_failure/pulmonary_odema	OTHERS
Non-cancer_illness_code__self-reported:_heart_valve_problem/heart_murmur	OTHERS
Non-cancer_illness_code__self-reported:_hepatitis_a	OTHERS
Non-cancer_illness_code__self-reported:_herpes_simplex	OTHERS
Non-cancer_illness_code__self-reported:_hiv/aids	OTHERS
Non-cancer_illness_code__self-reported:_hypertension	OTHERS
Non-cancer_illness_code__self-reported:_hyperthyroidism/thyrotoxicosis	OTHERS
Non-cancer_illness_code__self-reported:_hypothyroidism/myxoedema	OTHERS
Non-cancer_illness_code__self-reported:_insomnia	OTHERS
Non-cancer_illness_code__self-reported:_iritis	OTHERS
Non-cancer_illness_code__self-reported:_joint_pain	OTHERS
Non-cancer_illness_code__self-reported:_kidney_stone/ureter_stone/bladder_stone	OTHERS
Non-cancer_illness_code__self-reported:_labyrinthitis	OTHERS
Non-cancer_illness_code__self-reported:_leg_claudication/_intermittent_claudication	OTHERS
Non-cancer_illness_code__self-reported:_lichen_planus	OTHERS
Non-cancer_illness_code__self-reported:_lichen_sclerosis	OTHERS
Non-cancer_illness_code__self-reported:_liver/biliary/pancreas_problem	OTHERS
Non-cancer_illness_code__self-reported:_macular_degeneration	OTHERS
Non-cancer_illness_code__self-reported:_malabsorption/coeliac_disease	OTHERS
Non-cancer_illness_code__self-reported:_malaria	OTHERS
Non-cancer_illness_code__self-reported:_measles_/_morbillivirus	OTHERS
Non-cancer_illness_code__self-reported:_multiple_sclerosis	OTHERS
Non-cancer_illness_code__self-reported:_mumps_/_epidemic_parotitis	OTHERS
Non-cancer_illness_code__self-reported:_myasthenia_gravis	OTHERS
Non-cancer_illness_code__self-reported:_myositis/myopathy	OTHERS
Non-cancer_illness_code__self-reported:_neck_problem/injury	OTHERS
Non-cancer_illness_code__self-reported:_nephritis	OTHERS
Non-cancer_illness_code__self-reported:_nervous_breakdown	OTHERS
Non-cancer_illness_code__self-reported:_non-infective_hepatitis	OTHERS
Non-cancer_illness_code__self-reported:_osteopenia	OTHERS
Non-cancer_illness_code__self-reported:_other_neurological_problem	OTHERS
Non-cancer_illness_code__self-reported:_other_renal/kidney_problem	OTHERS
Non-cancer_illness_code__self-reported:_peripheral_nerve_injury	OTHERS
Non-cancer_illness_code__self-reported:_peritonitis	OTHERS
Non-cancer_illness_code__self-reported:_pernicious_anaemia	OTHERS
Non-cancer_illness_code__self-reported:_pleurisy	OTHERS
Non-cancer_illness_code__self-reported:_pneumothorax	OTHERS
Non-cancer_illness_code__self-reported:_polymyalgia_rheumatica	OTHERS
Non-cancer_illness_code__self-reported:_prolapsed_disc/slipped_disc	OTHERS
Non-cancer_illness_code__self-reported:_psoriasis	OTHERS
Non-cancer_illness_code__self-reported:_psoriatic_arthropathy	OTHERS
Non-cancer_illness_code__self-reported:_pyloric_stenosis	OTHERS
Non-cancer_illness_code__self-reported:_rectal_or_colon_adenoma/polyps	OTHERS
Non-cancer_illness_code__self-reported:_retinal_detachment	OTHERS
Non-cancer_illness_code__self-reported:_retinal_problem	OTHERS
Non-cancer_illness_code__self-reported:_rheumatic_fever	OTHERS
Non-cancer_illness_code__self-reported:_rheumatoid_arthritis	OTHERS
Non-cancer_illness_code__self-reported:_rosacea	OTHERS
Non-cancer_illness_code__self-reported:_sarcoidosis	OTHERS
Non-cancer_illness_code__self-reported:_schizophrenia	OTHERS
Non-cancer_illness_code__self-reported:_scleroderma/systemic_sclerosis	OTHERS
Non-cancer_illness_code__self-reported:_septicaemia_/_sepsis	OTHERS
Non-cancer_illness_code__self-reported:_spinal_cord_disorder	OTHERS
Non-cancer_illness_code__self-reported:_spinal_injury	OTHERS
Non-cancer_illness_code__self-reported:_spinal_stenosis	OTHERS
Non-cancer_illness_code__self-reported:_spine_arthritis/spondylitis	OTHERS
Non-cancer_illness_code__self-reported:_stomach_disorder	OTHERS
Non-cancer_illness_code__self-reported:_stress	OTHERS
Non-cancer_illness_code__self-reported:_stroke	OTHERS
Non-cancer_illness_code__self-reported:_subarachnoid_haemorrhage	OTHERS
Non-cancer_illness_code__self-reported:_subdural_haemorrhage/haematoma	OTHERS
Non-cancer_illness_code__self-reported:_svt_/_supraventricular_tachycardia	OTHERS
Non-cancer_illness_code__self-reported:_tennis_elbow_/_lateral_epicondylitis	OTHERS
Non-cancer_illness_code__self-reported:_thyroid_goitre	OTHERS
Non-cancer_illness_code__self-reported:_thyroiditis	OTHERS
Non-cancer_illness_code__self-reported:_thyroid_problem_(not_cancer)	OTHERS
Non-cancer_illness_code__self-reported:_trigemminal_neuralgia	OTHERS
Non-cancer_illness_code__self-reported:_tuberculosis_(tb)	OTHERS
Non-cancer_illness_code__self-reported:_type_1_diabetes	OTHERS
Non-cancer_illness_code__self-reported:_type_2_diabetes	OTHERS
Non-cancer_illness_code__self-reported:_ulcerative_colitis	OTHERS
Non-cancer_illness_code__self-reported:_ureteric_obstruction/hydronephrosis	OTHERS
Non-cancer_illness_code__self-reported:_urinary_frequency_/_incontinence	OTHERS
Non-cancer_illness_code__self-reported:_urticaria	OTHERS
Non-cancer_illness_code__self-reported:_varicose_veins	OTHERS
Non-cancer_illness_code__self-reported:_vasculitis	OTHERS
Non-cancer_illness_code__self-reported:_vertigo	OTHERS
Non-cancer_illness_code__self-reported:_vitiligo	OTHERS
Non-follicular_lymphoma	CANCER
Number_of_self-reported_cancers	OTHERS
Number_of_self-reported_non-cancer_illnesses	OTHERS
Number_of_treatments/medications_taken	OTHERS
Obesity	METABOLISM
Obesity__other/unspecified	METABOLISM
Oher_and_unspecified_postprocedural_disorders_of_eye_and_adnexa	EYE
Oher_enthesopathy_of_foot_(+metatarsalgia)	OTHERS
Oily_fish_intake	OTHERS
Other_anaemias	BLOOD
Other_and_unsepcified_mononeuropathies__also_in_other_diseases	NEURO
Other_and_unspecified_anaemias	BLOOD
Other_and_unspecified_degenerative_diseases_of_nervous_system	NEURO
Other_and_unspecified_disorders_of_pigmentation	SKIN
Other_and_unspecified_erythematous_conditions	SKIN
Other_and_unspecified_follicular_disorders	SKIN
Other_and_unspecified_glaucoma	EYE
Other_and_unspecified_granulomatous_disorders_of_skin_and_subcutaneous_tissue	SKIN
Other_and_unspecified_hypertrophic_disorders_of_skin	SKIN
Other_and_unspecified_nail_disorders	SKIN
Other_and_unspecified_skin_changes_due_to_chronic_exposure_to_nonionizing_radiation	OTHERS
Other_and_unspecified_types_of_non-Hodgkin_lymphoma	CANCER
Other_and_unspecified_urticaria	SKIN
Other_appendicitis	OTHERS
Other_articular_cartilage_disorders	OTHERS
Other_conjunctival_vascular_disorders_and_cysts	OTHERS
Other_deformity_of_hallux_(acquired)	OTHERS
Other_degenerative_diseases_of_the_nervous_system	NEURO
Other_diseases_of_the_digestive_system	DIGESTIVE
Other_disorders_of_conjunctiva	EYE
Other_disorders_of_eyelid	EYE
Other_disorders_of_lacrimal_gland	HARMONAL
Other_disorders_of_patella	OTHERS
Other_disorders_of_pigmentation	SKIN
Other_dorsopathies__not_elsewhere_classified	OTHERS
Other_enthesopathies	OTHERS
Other_erythematous_conditions	SKIN
Other_follicular_disorders	SKIN
Other_hammer_toe(s)_(acquired)	OTHERS
Other_hearing_loss	OTHERS
Other_local_infections_of_skin_and_subcutaneous_tissue	OTHERS
Other_malignant_neoplasms_of_skin	CANCER
Other_melanin_hyperpigmentation	SKIN
#Other_necrotizing_vasculopathies_(FG)	OTHERS
Other_other_unspecified_disorders_of_the_circulatory_system	OTHERS
Other_pulmonary_diagnosis	RESPIRATORY
Other_retinal_disorders	EYE
Other_serious_medical_condition/disability_diagnosed_by_doctor	OTHERS
Other_shoulder_lesions	OTHERS
Other_specified_and_unspecified__disorders_of_eyelid	EYE
Other_specified_and_unspecified_strabismus	EYE
Other_specified_disorders_of_external_ear	OTHERS
Other_specified/unspecified_bacterial_intestinal_infections	OTHERS
Other_specified/unspecified_disorders_of_synovium_and_tendon_+Other_specified/unspecified_bursopathies	OTHERS
Other_specified/unspecified_disorders_of_tympanic_membrane	OTHERS
Other_specified/unspecified_hearing_loss	OTHERS
Other_specified/unspecified_inflammatory_spondylopathies	INFLAMMATORY
Other_strabismus	EYE
#Other_systemic_involvement_of_connective_tissue	OTHERS
Other_systemic_involvement_of_connective_tissue_(FG)	OTHERS
Other_ulcerative_colitis	INFLAMMATORY
Other/unspecified_enthesopathies__not_elsewhere_classified	OTHERS
Other/unspecified_rheumatoid_arthritis	INFLAMMATORY
Other/unspecified_seropositiverheumatoid_arthritis	INFLAMMATORY
Other/unspecified_synovitis_and_tenosynovitis	INFLAMMATORY
Other_viral_diseases	IMMUNE
Otitis_externa	INFLAMMATORY
Otitis_externa__unspecified	INFLAMMATORY
Otitis_media__unspecified	INFLAMMATORY
Overall_health_rating	OTHERS
Own_or_rent_accommodation_lived_in:_Pay_part_rent_and_part_mortgage_(shared_ownership)	OTHERS
Pain_type(s)_experienced_in_last_month:_Back_pain	OTHERS
Pain_type(s)_experienced_in_last_month:_Headache	OTHERS
Paralytic_strabismus	EYE
Past_tobacco_smoking	OTHERS
Peak_expiratory_flow_(PEF)	RESPIRATORY
Phosphate_(mmol/L)	BLOOD
Plantar_fascial_fibromatosis	OTHERS
Platelet_count	BLOOD
Platelet_crit	BLOOD
Platelet_distribution_width	BLOOD
Plays_computer_games	OTHERS
#Polyarthropathies	OTHERS
Polyneuropathies_and_other_disorders_of_the_peripheral_nervous_system	NEURO
Postprocedural_disorders_of_eye_and_adnexa__not_elsewhere_classified	EYE
Potassium	OTHERS
Pre-eclampsia_or_eclampsia	FEMALE
Pregnancy_hypertension	FEMALE
Primary_angle-closure_glaucoma	EYE
Primary_coxarthrosis__bilateral	OTHERS
Primary_gonarthrosis__bilateral	OTHERS
Primary_open-angle_glaucoma	EYE
Psoriasis	SKIN
Pulse_rate	CARDIO
Pulse_rate__automated_reading	CARDIO
Pulse_wave_reflection_index	CARDIO
Pyogenic_granuloma	OTHERS
Qualifications:_A_levels/AS_levels_or_equivalent	OTHERS
Qualifications:_College_or_University_degree	OTHERS
Qualifications:_CSEs_or_equivalent	OTHERS
Qualifications:_None_of_the_above	OTHERS
Radial_styloid_tenosynovitis_[de_Quervain]	OTHERS
Radiculopathy	OTHERS
Reason_for_glasses/contact_lenses:_For_'astigmatism'	OTHERS
Reason_for_glasses/contact_lenses:_For_short-sightedness__i.e._only_or_mainly_for_distance_viewing_such_as_driving__cinema_etc_(called_'myopia')	OTHERS
Reason_for_glasses/contact_lenses:_Other_eye_condition	OTHERS
Reason_former_drinker_stopped_drinking_alcohol:_Financial_reasons	OTHERS
Recent_trouble_relaxing	OTHERS
Red_blood_cell_(erythrocyte)_count	BLOOD
Red_blood_cell_(erythrocyte)_distribution_width	BLOOD
Relative_age_of_first_facial_hair	OTHERS
Relative_age_voice_broke	OTHERS
Reported_occurrences_of_cancer	OTHERS
Residual_foreign_body_in_soft_tissue	OTHERS
Reticulocyte_count	BLOOD
Reticulocyte_percentage	BLOOD
Retinal_breaks_without_detachment	EYE
Retinal_detachments_and_breaks	EYE
Retinal_detachment_with_retinal_break	EYE
Rheumatic_fever_incl_heart_disease	IMMUNE
Rheumatic_valve_diseases	IMMUNE
Rheumatism__unspecified	IMMUNE
Rheumatoid_arthritis	IMMUNE
Salt_added_to_food	OTHERS
Schizophrenia_or_delusion	NEURO
Schizophrenia__schizotypal_and_delusional_disorders	NEURO
Secondary_and_unspecified_malignant_neoplasm_of_lymph_nodes	CANCER
Secondary_polycythaemia	CANCER
Sensitivity_/_hurt_feelings	OTHERS
Sensorineural_hearing_loss	NEURO
Seropositive_rheumatoid_arthritis	IMMUNE
SHBG_(nmol/L)	BLOOD
Sitting_height	ANTHROPOMETRIC
Size_of_rose_wine_glass_drunk:_small_(125ml)	OTHERS
Skin_changes_due_to_chronic_exposure_to_nonionizing_radiation	SKIN
Skin_colour	SKIN
Skin_removed_from_poultry	OTHERS
Small_fibre_neuropathy	NEURO
Smoking_status:_Never	OTHERS
Smoking_status:_Previous	OTHERS
Snoring	OTHERS
Spherical_power_(left)	EYE
Spherical_power_(right)	EYE
Spinal_stenosis	OTHERS
Spondylolisthesis/Spondylolysis	OTHERS
Spread_type:_Flora_Pro-Active/Benecol	OTHERS
Standard_tea_intake	OTHERS
Standing_height	ANTHROPOMETRIC
Started_insulin_within_one_year_diagnosis_of_diabetes	OTHERS
Substance_abuse	OTHERS
Substance_of_prescription_or_over-the-counter_medication_addiction:_Something_else	OTHERS
Substances_taken_for_anxiety:_Unprescribed_medication_(more_than_once)	OTHERS
Suffer_from_'nerves'	OTHERS
Suggestive_for_eosinophilic_asthma	OTHERS
Suppurative_and_unspecified_otitis_media	OTHERS
Surgery/amputation_of_toe_or_leg:_Yes__toes	OTHERS
Sweets_intake	OTHERS
Systolic_blood_pressure__automated_reading	CARDIO
Taking_other_prescription_medications	OTHERS
Testosterone_(nmol/L)	BLOOD
Thrombocytopenia__unspecified	BLOOD
Time_spend_outdoors_in_summer	OTHERS
Time_spent_doing_light_physical_activity	OTHERS
Time_spent_using_computer	OTHERS
Time_spent_watching_television_(TV)	OTHERS
Tobacco_smoking:_Smokes_on_most_or_all_days	OTHERS
Total_bilirubin_(umol/L)	BLOOD
Total_protein_(g/L)	BLOOD
Total_sugars	OTHERS
Transient_global_amnesia	OTHERS
Transport_type_for_commuting_to_job_workplace:_None_of_the_above	OTHERS
Traumatic_subdural_haemorrhage	OTHERS
Treatment/medication_code:_aciclovir	OTHERS
Treatment/medication_code:_actonel_5mg_tablet	OTHERS
Treatment/medication_code:_acyclovir	OTHERS
Treatment/medication_code:_adalate_10mg_capsule	OTHERS
Treatment/medication_code:_adcal-d3_1.5g/10micrograms_chewable_tablet	OTHERS
Treatment/medication_code:_adipine_mr_10_m/r_tablet	OTHERS
Treatment/medication_code:_adizem-60_m/r_tablet	OTHERS
Treatment/medication_code:_adizem-xl_plus_m/r_capsule	OTHERS
Treatment/medication_code:_aloe_vera_product	OTHERS
Treatment/medication_code:_alverine	OTHERS
Treatment/medication_code:_amias_2mg_tablet	OTHERS
Treatment/medication_code:_amiloride	OTHERS
Treatment/medication_code:_amoxicillin	OTHERS
Treatment/medication_code:_anadin_tablet	OTHERS
Treatment/medication_code:_arcoxia_60mg_tablet	OTHERS
Treatment/medication_code:_arthrotec_50_tablet	OTHERS
Treatment/medication_code:_arthrotec_tablet	OTHERS
Treatment/medication_code:_atrovent_20micrograms_inhaler	OTHERS
Treatment/medication_code:_baclofen	OTHERS
Treatment/medication_code:_beclometasone	OTHERS
Treatment/medication_code:_beclomethasone	OTHERS
Treatment/medication_code:_beclomist_50micrograms_nasal_spray	OTHERS
Treatment/medication_code:_beconase_50micrograms_nasal_spray	OTHERS
Treatment/medication_code:_becotide_50_inhaler	OTHERS
Treatment/medication_code:_bendrofluazide	OTHERS
Treatment/medication_code:_bendroflumethiazide	OTHERS
Treatment/medication_code:_betamethasone	OTHERS
Treatment/medication_code:_betnovate_cream	OTHERS
Treatment/medication_code:_bisoprolol	OTHERS
Treatment/medication_code:_bisoprolol_fumarate+hydrochlorothiazide_10mg/6.25mg_tablet	OTHERS
Treatment/medication_code:_brimonidine_tartrate	OTHERS
Treatment/medication_code:_brinzolamide	OTHERS
Treatment/medication_code:_budesonide	OTHERS
Treatment/medication_code:_budesonide+formoterol	OTHERS
Treatment/medication_code:_bumetanide	OTHERS
Treatment/medication_code:_buprenorphine	OTHERS
Treatment/medication_code:_calcichew_1.25g_chewable_tablet	OTHERS
Treatment/medication_code:_calcichew_forte_2.5g_chewable_tablet	OTHERS
Treatment/medication_code:_calcium_carbonate+cholecalciferol_1.25g/200iu_tablet	OTHERS
Treatment/medication_code:_calcium_carbonate+colecalciferol_1.25g/5micrograms_tablet	OTHERS
Treatment/medication_code:_calcium+ergocalciferol_tablet	OTHERS
Treatment/medication_code:_calcium+vitamin_d_500units_tablet	OTHERS
Treatment/medication_code:_carbamazepine	OTHERS
Treatment/medication_code:_carbomers	OTHERS
Treatment/medication_code:_cardicor_1.25mg_tablet	OTHERS
Treatment/medication_code:_cardioplen_xl_5mg_m/r_tablet	OTHERS
Treatment/medication_code:_carmellose	OTHERS
Treatment/medication_code:_cipralex_5mg_tablet	OTHERS
Treatment/medication_code:_ciprofloxacin	OTHERS
Treatment/medication_code:_clomipramine	OTHERS
Treatment/medication_code:_clonazepam	OTHERS
Treatment/medication_code:_clonidine	OTHERS
Treatment/medication_code:_co-amilofruse	OTHERS
Treatment/medication_code:_co-amilozide	OTHERS
Treatment/medication_code:_codeine_phosphate+kaolin_10mg/3g/10ml_mixture	OTHERS
Treatment/medication_code:_colchicine	OTHERS
Treatment/medication_code:_colofac-100_tablet	OTHERS
Treatment/medication_code:_colpermin_0.2ml_m/r_gel_e/c_capsule	OTHERS
Treatment/medication_code:_combivent_inhaler	OTHERS
Treatment/medication_code:_co-proxamol	OTHERS
Treatment/medication_code:_coversyl_2mg_tablet	OTHERS
Treatment/medication_code:_cozaar_25mg_tablet	OTHERS
Treatment/medication_code:_creon_e/c_granules_in_capsule	OTHERS
Treatment/medication_code:_cymalon_cranberry_1.5g/5ml_liquid	OTHERS
Treatment/medication_code:_depakote_250mg_e/c_tablet	OTHERS
Treatment/medication_code:_dermovate_cream	OTHERS
Treatment/medication_code:_desloratadine	OTHERS
Treatment/medication_code:_detrusitol_1mg_tablet	OTHERS
Treatment/medication_code:_dexamethasone+hypromellose_0.1%/0.5%_eye_drops	OTHERS
Treatment/medication_code:_diclofenac_sodium+misoprostol	OTHERS
Treatment/medication_code:_dicloflex_25mg_e/c_tablet	OTHERS
Treatment/medication_code:_diltiazem	OTHERS
Treatment/medication_code:_diovan_40mg_capsule	OTHERS
Treatment/medication_code:_domperidone	OTHERS
Treatment/medication_code:_dorzolamide	OTHERS
Treatment/medication_code:_dovonex_50micrograms/g_cream	OTHERS
Treatment/medication_code:_duloxetine	OTHERS
Treatment/medication_code:_epanutin_25mg_capsule	OTHERS
Treatment/medication_code:_eprosartan	OTHERS
Treatment/medication_code:_erythromycin	OTHERS
Treatment/medication_code:_escitalopram	OTHERS
Treatment/medication_code:_etodolac	OTHERS
Treatment/medication_code:_etoricoxib	OTHERS
Treatment/medication_code:_evening_primrose_oil_product	OTHERS
Treatment/medication_code:_felodipine	OTHERS
Treatment/medication_code:_fexofenadine	OTHERS
Treatment/medication_code:_flax_oil_tablet	OTHERS
Treatment/medication_code:_flecainide	OTHERS
Treatment/medication_code:_flixonase_50micrograms_aqueous_nasal_spray	OTHERS
Treatment/medication_code:_flucloxacillin	OTHERS
Treatment/medication_code:_fludrocortisone	OTHERS
Treatment/medication_code:_flu_-_influenza_vaccine	OTHERS
Treatment/medication_code:_fluticasone	OTHERS
Treatment/medication_code:_fluvastatin	OTHERS
Treatment/medication_code:_folic_acid_product	OTHERS
Treatment/medication_code:_forceval_capsule	OTHERS
Treatment/medication_code:_formoterol	OTHERS
Treatment/medication_code:_fosinopril	OTHERS
Treatment/medication_code:_fybogel_mebeverine_sachet	OTHERS
Treatment/medication_code:_fybogel_orange_s/f_granules	OTHERS
Treatment/medication_code:_gamolenic_acid	OTHERS
Treatment/medication_code:_gaviscon_liquid	OTHERS
Treatment/medication_code:_glucophage_500mg_tablet	OTHERS
Treatment/medication_code:_gtn_-_glyceryl_trinitrate	OTHERS
Treatment/medication_code:_half-inderal_la_80mg_m/r_capsule	OTHERS
Treatment/medication_code:_hepacon_b12_1mg/1ml_injection	OTHERS
Treatment/medication_code:_humira_40mg_injection_solution_0.8ml_prefilled_syringe	OTHERS
Treatment/medication_code:_hydrocortisone	OTHERS
Treatment/medication_code:_hydrocortisone_product	OTHERS
Treatment/medication_code:_hydroxocobalamin	OTHERS
Treatment/medication_code:_hydroxycarbamide	OTHERS
Treatment/medication_code:_hypromellose_product	OTHERS
Treatment/medication_code:_imdur_60mg_durule	OTHERS
Treatment/medication_code:_imigran_50mg_tablet	OTHERS
Treatment/medication_code:_imipramine	OTHERS
Treatment/medication_code:_imodium_2mg_capsule	OTHERS
Treatment/medication_code:_indapamide	OTHERS
Treatment/medication_code:_inderal_10mg_tablet	OTHERS
Treatment/medication_code:_indomethacin	OTHERS
Treatment/medication_code:_insulin_product	OTHERS
Treatment/medication_code:_iron_sulphate	OTHERS
Treatment/medication_code:_ismn_-_isosorbide_mononitrate	OTHERS
Treatment/medication_code:_ismo_-_isosorbide_mononitrate	OTHERS
Treatment/medication_code:_ispaghula_husk	OTHERS
Treatment/medication_code:_ispaghula_husk_product	OTHERS
Treatment/medication_code:_keppra_250mg_tablet	OTHERS
Treatment/medication_code:_leflunomide	OTHERS
Treatment/medication_code:_lercanidipine	OTHERS
Treatment/medication_code:_levetiracetam	OTHERS
Treatment/medication_code:_levothyroxine_sodium	OTHERS
Treatment/medication_code:_lipitor_10mg_tablet	OTHERS
Treatment/medication_code:_liquifilm_tears_1.4%_eye_drops	OTHERS
Treatment/medication_code:_lisinopril+hydrochlorothiazide_10mg/12.5mg_tablet	OTHERS
Treatment/medication_code:_loperamide	OTHERS
Treatment/medication_code:_loratadine	OTHERS
Treatment/medication_code:_lorazepam	OTHERS
Treatment/medication_code:_losartan	OTHERS
Treatment/medication_code:_losartan_potassium+hydrochlorothiazide_50mg/12.5mg_tablet	OTHERS
Treatment/medication_code:_lumigan_0.3mg/ml_eye_drops	OTHERS
Treatment/medication_code:_luteine	OTHERS
Treatment/medication_code:_lymecycline	OTHERS
Treatment/medication_code:_magnesium_citrate	OTHERS
Treatment/medication_code:_maxalt_5mg_tablet	OTHERS
Treatment/medication_code:_mebeverine	OTHERS
Treatment/medication_code:_merbentyl_10mg_tablet	OTHERS
Treatment/medication_code:_mesalazine	OTHERS
Treatment/medication_code:_metformin	OTHERS
Treatment/medication_code:_methotrexate	OTHERS
Treatment/medication_code:_metoprolol	OTHERS
Treatment/medication_code:_metronidazole	OTHERS
Treatment/medication_code:_migraleve_tablet	OTHERS
Treatment/medication_code:_minocycline	OTHERS
Treatment/medication_code:_mometasone	OTHERS
Treatment/medication_code:_montelukast_product	OTHERS
Treatment/medication_code:_morphine	OTHERS
Treatment/medication_code:_motilium_10mg_tablet	OTHERS
Treatment/medication_code:_movelat_gel	OTHERS
Treatment/medication_code:_movicol_oral_powder	OTHERS
Treatment/medication_code:_moxonidine	OTHERS
Treatment/medication_code:_multivitamin+mineral_preparations	OTHERS
Treatment/medication_code:_multivitamins_capsule	OTHERS
Treatment/medication_code:_mycophenolate	OTHERS
Treatment/medication_code:_naprosyn_250mg_tablet	OTHERS
Treatment/medication_code:_naramig_2.5mg_tablet	OTHERS
Treatment/medication_code:_naratriptan	OTHERS
Treatment/medication_code:_nasobec_aqueous_50micrograms_nasal_spray	OTHERS
Treatment/medication_code:_nexium_20mg_tablet	OTHERS
Treatment/medication_code:_nifedipine	OTHERS
Treatment/medication_code:_nitrolingual_400micrograms_spray	OTHERS
Treatment/medication_code:_nitromin_400micrograms_cfc-free_spray	OTHERS
Treatment/medication_code:_nurofen_200mg_tablet	OTHERS
Treatment/medication_code:_olmesartan	OTHERS
Treatment/medication_code:_oxybutynin	OTHERS
Treatment/medication_code:_oxycodone_hydrochloride	OTHERS
Treatment/medication_code:_paracetamol	OTHERS
Treatment/medication_code:_paracetamol_+_codeine	OTHERS
Treatment/medication_code:_paramax_tablet	OTHERS
Treatment/medication_code:_pariet_10mg_e/c_tablet	OTHERS
Treatment/medication_code:_penicillin	OTHERS
Treatment/medication_code:_perindopril	OTHERS
Treatment/medication_code:_phenytoin	OTHERS
Treatment/medication_code:_phyllocontin_continus_225mg_m/r_tablet	OTHERS
Treatment/medication_code:_pioglitazone	OTHERS
Treatment/medication_code:_piriton_4mg_tablet	OTHERS
Treatment/medication_code:_piroxicam	OTHERS
Treatment/medication_code:_plaquenil_200mg_tablet	OTHERS
Treatment/medication_code:_plavix_75mg_tablet	OTHERS
Treatment/medication_code:_pravastatin	OTHERS
Treatment/medication_code:_prednisolone_product	OTHERS
Treatment/medication_code:_prednisone	OTHERS
Treatment/medication_code:_pregabalin	OTHERS
Treatment/medication_code:_procyclidine	OTHERS
Treatment/medication_code:_propranolol	OTHERS
Treatment/medication_code:_protelos_2g_sachets	OTHERS
Treatment/medication_code:_prozac_20mg_capsule	OTHERS
Treatment/medication_code:_pulmicort_ls_50micrograms_inhaler	OTHERS
Treatment/medication_code:_pyridoxine_preparation	OTHERS
Treatment/medication_code:_reductil_10mg_capsule	OTHERS
Treatment/medication_code:_rennie_duo_oral_suspension	OTHERS
Treatment/medication_code:_rhinocort_50micrograms_nasal_spray	OTHERS
Treatment/medication_code:_rino_clenil_50micrograms_nasal_spray	OTHERS
Treatment/medication_code:_risedronate_sodium	OTHERS
Treatment/medication_code:_risperidone	OTHERS
Treatment/medication_code:_rizatriptan	OTHERS
Treatment/medication_code:_ropinirole	OTHERS
Treatment/medication_code:_rosiglitazone	OTHERS
Treatment/medication_code:_salamol_100micrograms_inhaler	OTHERS
Treatment/medication_code:_salbutamol	OTHERS
Treatment/medication_code:_salbutamol_product	OTHERS
Treatment/medication_code:_salmeterol	OTHERS
Treatment/medication_code:_selenium_ace_tablet	OTHERS
Treatment/medication_code:_senna_product	OTHERS
Treatment/medication_code:_seretide_50_evohaler	OTHERS
Treatment/medication_code:_seroxat_20mg_tablet	OTHERS
Treatment/medication_code:_simvador_10mg_tablet	OTHERS
Treatment/medication_code:_sinemet-62.5_tablet	OTHERS
Treatment/medication_code:_slozem_120mg_m/r_capsule	OTHERS
Treatment/medication_code:_solpadol_capsule	OTHERS
Treatment/medication_code:_stemetil_5mg_tablet	OTHERS
Treatment/medication_code:_strontium_product	OTHERS
Treatment/medication_code:_sumatriptan	OTHERS
Treatment/medication_code:_symbicort_100/6_turbohaler	OTHERS
Treatment/medication_code:_syndol_tablet	OTHERS
Treatment/medication_code:_tacrolimus	OTHERS
Treatment/medication_code:_telfast_30_tablet	OTHERS
Treatment/medication_code:_telmisartan	OTHERS
Treatment/medication_code:_temazepam	OTHERS
Treatment/medication_code:_tenofovir	OTHERS
Treatment/medication_code:_terbinafine	OTHERS
Treatment/medication_code:_tetralysal_300_capsule	OTHERS
Treatment/medication_code:_thyroxine_product	OTHERS
Treatment/medication_code:_thyroxine_sodium	OTHERS
Treatment/medication_code:_timolol	OTHERS
Treatment/medication_code:_timoptol_0.25%_eye_drops	OTHERS
Treatment/medication_code:_tolterodine_l-tartrate	OTHERS
Treatment/medication_code:_tramacet_325mg/37.5mg_tablet	OTHERS
Treatment/medication_code:_travatan_40micrograms/ml_eye_drops	OTHERS
Treatment/medication_code:_triamcinolone	OTHERS
Treatment/medication_code:_trimovate_ointment	OTHERS
Treatment/medication_code:_ursodeoxycholic_acid	OTHERS
Treatment/medication_code:_vascalpha_5mg_m/r_tablet	OTHERS
Treatment/medication_code:_ventolin_100micrograms_inhaler	OTHERS
Treatment/medication_code:_ventolin_2mg_tablet	OTHERS
Treatment/medication_code:_vesicare_5mg_tablet	OTHERS
Treatment/medication_code:_viscotears_liquid_eye_gel	OTHERS
Treatment/medication_code:_vitamin_a	OTHERS
Treatment/medication_code:_voltarol_25mg_e/c_tablet	OTHERS
Treatment/medication_code:_voltarol_emulgel	OTHERS
Treatment/medication_code:_zanidip_10mg_tablet	OTHERS
Treatment/medication_code:_zapain_caplet	OTHERS
Treatment/medication_code:_zimovane_ls_3.75mg_tablet	OTHERS
Treatment/medication_code:_zirtek_10mg_tablet	OTHERS
Treatment/medication_code:_zolpidem	OTHERS
Treatment/medication_code:_zomig_2.5mg_tablet	OTHERS
Triglycerides_(mmol/L)	BLOOD
Trochanteric_bursitis	INFLAMMATORY
Trunk_fat-free_mass	METABOLISM
Trunk_fat_mass	METABOLISM
Trunk_fat_percentage	METABOLISM
Trunk_predicted_mass	METABOLISM
Type_1_diabetes	METABOLISM
Type_1_diabetes_with_ketoacidosis	METABOLISM
Type_1_diabetes_with_ophthalmic_complications	METABOLISM
Type_1_diabetes_without_complications	METABOLISM
Type_2_diabetes_with_peripheral_circulatory_complications	METABOLISM
Type_milk_consumed:_goat/sheep_milk	OTHERS
Type_milk_consumed:_other_type_of_milk	OTHERS
Type_milk_consumed:_rice/oat/vegetable_milk	OTHERS
Type_of_accommodation_lived_in:_Mobile_or_temporary_structure_(i.e._caravan)	OTHERS
Type_of_fat/oil_used_in_cooking:_Cholesterol_lowering_polyunsaturated_margarine	OTHERS
Type_of_fat/oil_used_in_cooking:_Hard_margarine	OTHERS
Type_of_fat/oil_used_in_cooking:_Low_fat_soft_margarine	OTHERS
Type_of_fat/oil_used_in_cooking:_Normal_fat_polyunsaturated_margarine	OTHERS
Type_of_fat/oil_used_in_cooking:_Normal_fat_soft_margarine	OTHERS
Type_of_fat/oil_used_in_cooking:_Normal_fat_soya_margarine	OTHERS
Type_of_fat/oil_used_in_cooking:_Other_oil	OTHERS
Type_of_fat/oil_used_in_cooking:_Other_type_fat	OTHERS
Type_of_fat/oil_used_in_cooking:_Rapeseed_oil	OTHERS
Type_of_fat/oil_used_in_cooking:_Soya_margarine	OTHERS
Type_of_fat/oil_used_in_cooking:_Unknown_olive_spread	OTHERS
Type_of_fat/oil_used_in_cooking:_Unknown/other_soft_margarine	OTHERS
Type_of_fat/oil_used_in_cooking:_Unknown_polyunsaturated_margarine	OTHERS
Type_of_fat/oil_used_in_cooking:_Unknown_soft_margarine	OTHERS
Type_of_fat/oil_used_in_cooking:_Very_low_fat_olive_spread	OTHERS
Type_of_fat/oil_used_in_cooking:_Very_low_fat_polyunsaturated_margarine	OTHERS
Type_of_meals_eaten:_Takeaway_meals	OTHERS
Type_of_special_diet_followed:_Lactose-free	OTHERS
Type_of_special_diet_followed:_Vegan	OTHERS
Types_of_transport_used_(excluding_work):_None_of_the_above	OTHERS
Ulcerative_colitis__NAS	INFLAMMATORY
Unclassified_diabetic_retinopathy	OTHERS
Underlying_(primary)_cause_of_death:_ICD10:_C16.9_Stomach__unspecified	OTHERS
Underlying_(primary)_cause_of_death:_ICD10:_C19_Malignant_neoplasm_of_rectosigmoid_junction	OTHERS
Underlying_(primary)_cause_of_death:_ICD10:_C22.1_Intrahepatic_bile_duct_carcinoma	OTHERS
Underlying_(primary)_cause_of_death:_ICD10:_C25.9_Pancreas__unspecified	OTHERS
Underlying_(primary)_cause_of_death:_ICD10:_C43.9_Malignant_melanoma_of_skin__unspecified	OTHERS
Underlying_(primary)_cause_of_death:_ICD10:_C45.9_Mesothelioma__unspecified	OTHERS
Underlying_(primary)_cause_of_death:_ICD10:_C56_Malignant_neoplasm_of_ovary	OTHERS
Underlying_(primary)_cause_of_death:_ICD10:_C64_Malignant_neoplasm_of_kidney__except_renal_pelvis	OTHERS
Underlying_(primary)_cause_of_death:_ICD10:_C67.9_Bladder__unspecified	OTHERS
Underlying_(primary)_cause_of_death:_ICD10:_C71.9_Brain__unspecified	OTHERS
Underlying_(primary)_cause_of_death:_ICD10:_C80_Malignant_neoplasm_without_specification_of_site	OTHERS
Underlying_(primary)_cause_of_death:_ICD10:_C90.0_Multiple_myeloma	OTHERS
Underlying_(primary)_cause_of_death:_ICD10:_G12.2_Motor_neuron_disease	OTHERS
Underlying_(primary)_cause_of_death:_ICD10:_I64_Stroke__not_specified_as_haemorrhage_or_infarction	OTHERS
Unsalted_nuts_intake	OTHERS
Unsepcified/other_endometriosis	FEMALE
Urate_(umol/L)	BLOOD
Urea_(mmol/L)	BLOOD
Urticaria	SKIN
Use_of_sun/uv_protection	OTHERS
Usual_walking_pace	OTHERS
Vascular_diseases_of_the_intestine	DIGESTIVE
Vascular/heart_problems_diagnosed_by_doctor:_High_blood_pressure	CARDIO
Vascular/heart_problems_diagnosed_by_doctor:_None_of_the_above	OTHERS
Visual_disturbances	EYE
Vitamin_and_mineral_supplements:_Folic_acid_or_Folate_(Vit_B9)	OTHERS
Vitamin_and/or_mineral_supplement_use:_Evening_primrose	OTHERS
Vitamin_and/or_mineral_supplement_use:_Iron	OTHERS
Vitamin_and/or_mineral_supplement_use:_Multivitamin_with_calcium	OTHERS
Vitamin_and/or_mineral_supplement_use:_Multivitamin_with_iron	OTHERS
Vitamin_and/or_mineral_supplement_use:_Selenium	OTHERS
Vitamin_and/or_mineral_supplement_use:_Vitamin_B6	OTHERS
Vitamin_D_(nmol/L)	BLOOD
Vitamin_E	OTHERS
Vitreous_haemorrhage	OTHERS
Volvulus	OTHERS
Waist_circumference	ANTHROPOMETRIC
Water_intake	OTHERS
Weight	ANTHROPOMETRIC
Wheeze_or_whistling_in_the_chest_in_last_year	OTHERS
White_blood_cell_(leukocyte)_count	BLOOD
Whole_body_fat-free_mass	METABOLISM
Whole_body_fat_mass	METABOLISM
Whole_body_water_mass	ANTHROPOMETRIC
Worked_with_materials_containing_asbestos:_Often	OTHERS
Worked_with_pesticides:_Often	OTHERS
Worrier_/_anxious_feelings	OTHERS
Worry_too_long_after_embarrassment	OTHERS
Xanthelasma_of_eyelid	EYE
