# Supplementary figures and images for: Balancing selection on genomic deletion polymorphisms in humans
Source: eLife journal article supplement (doi:10.7554/elife.79111), 2023-01-10

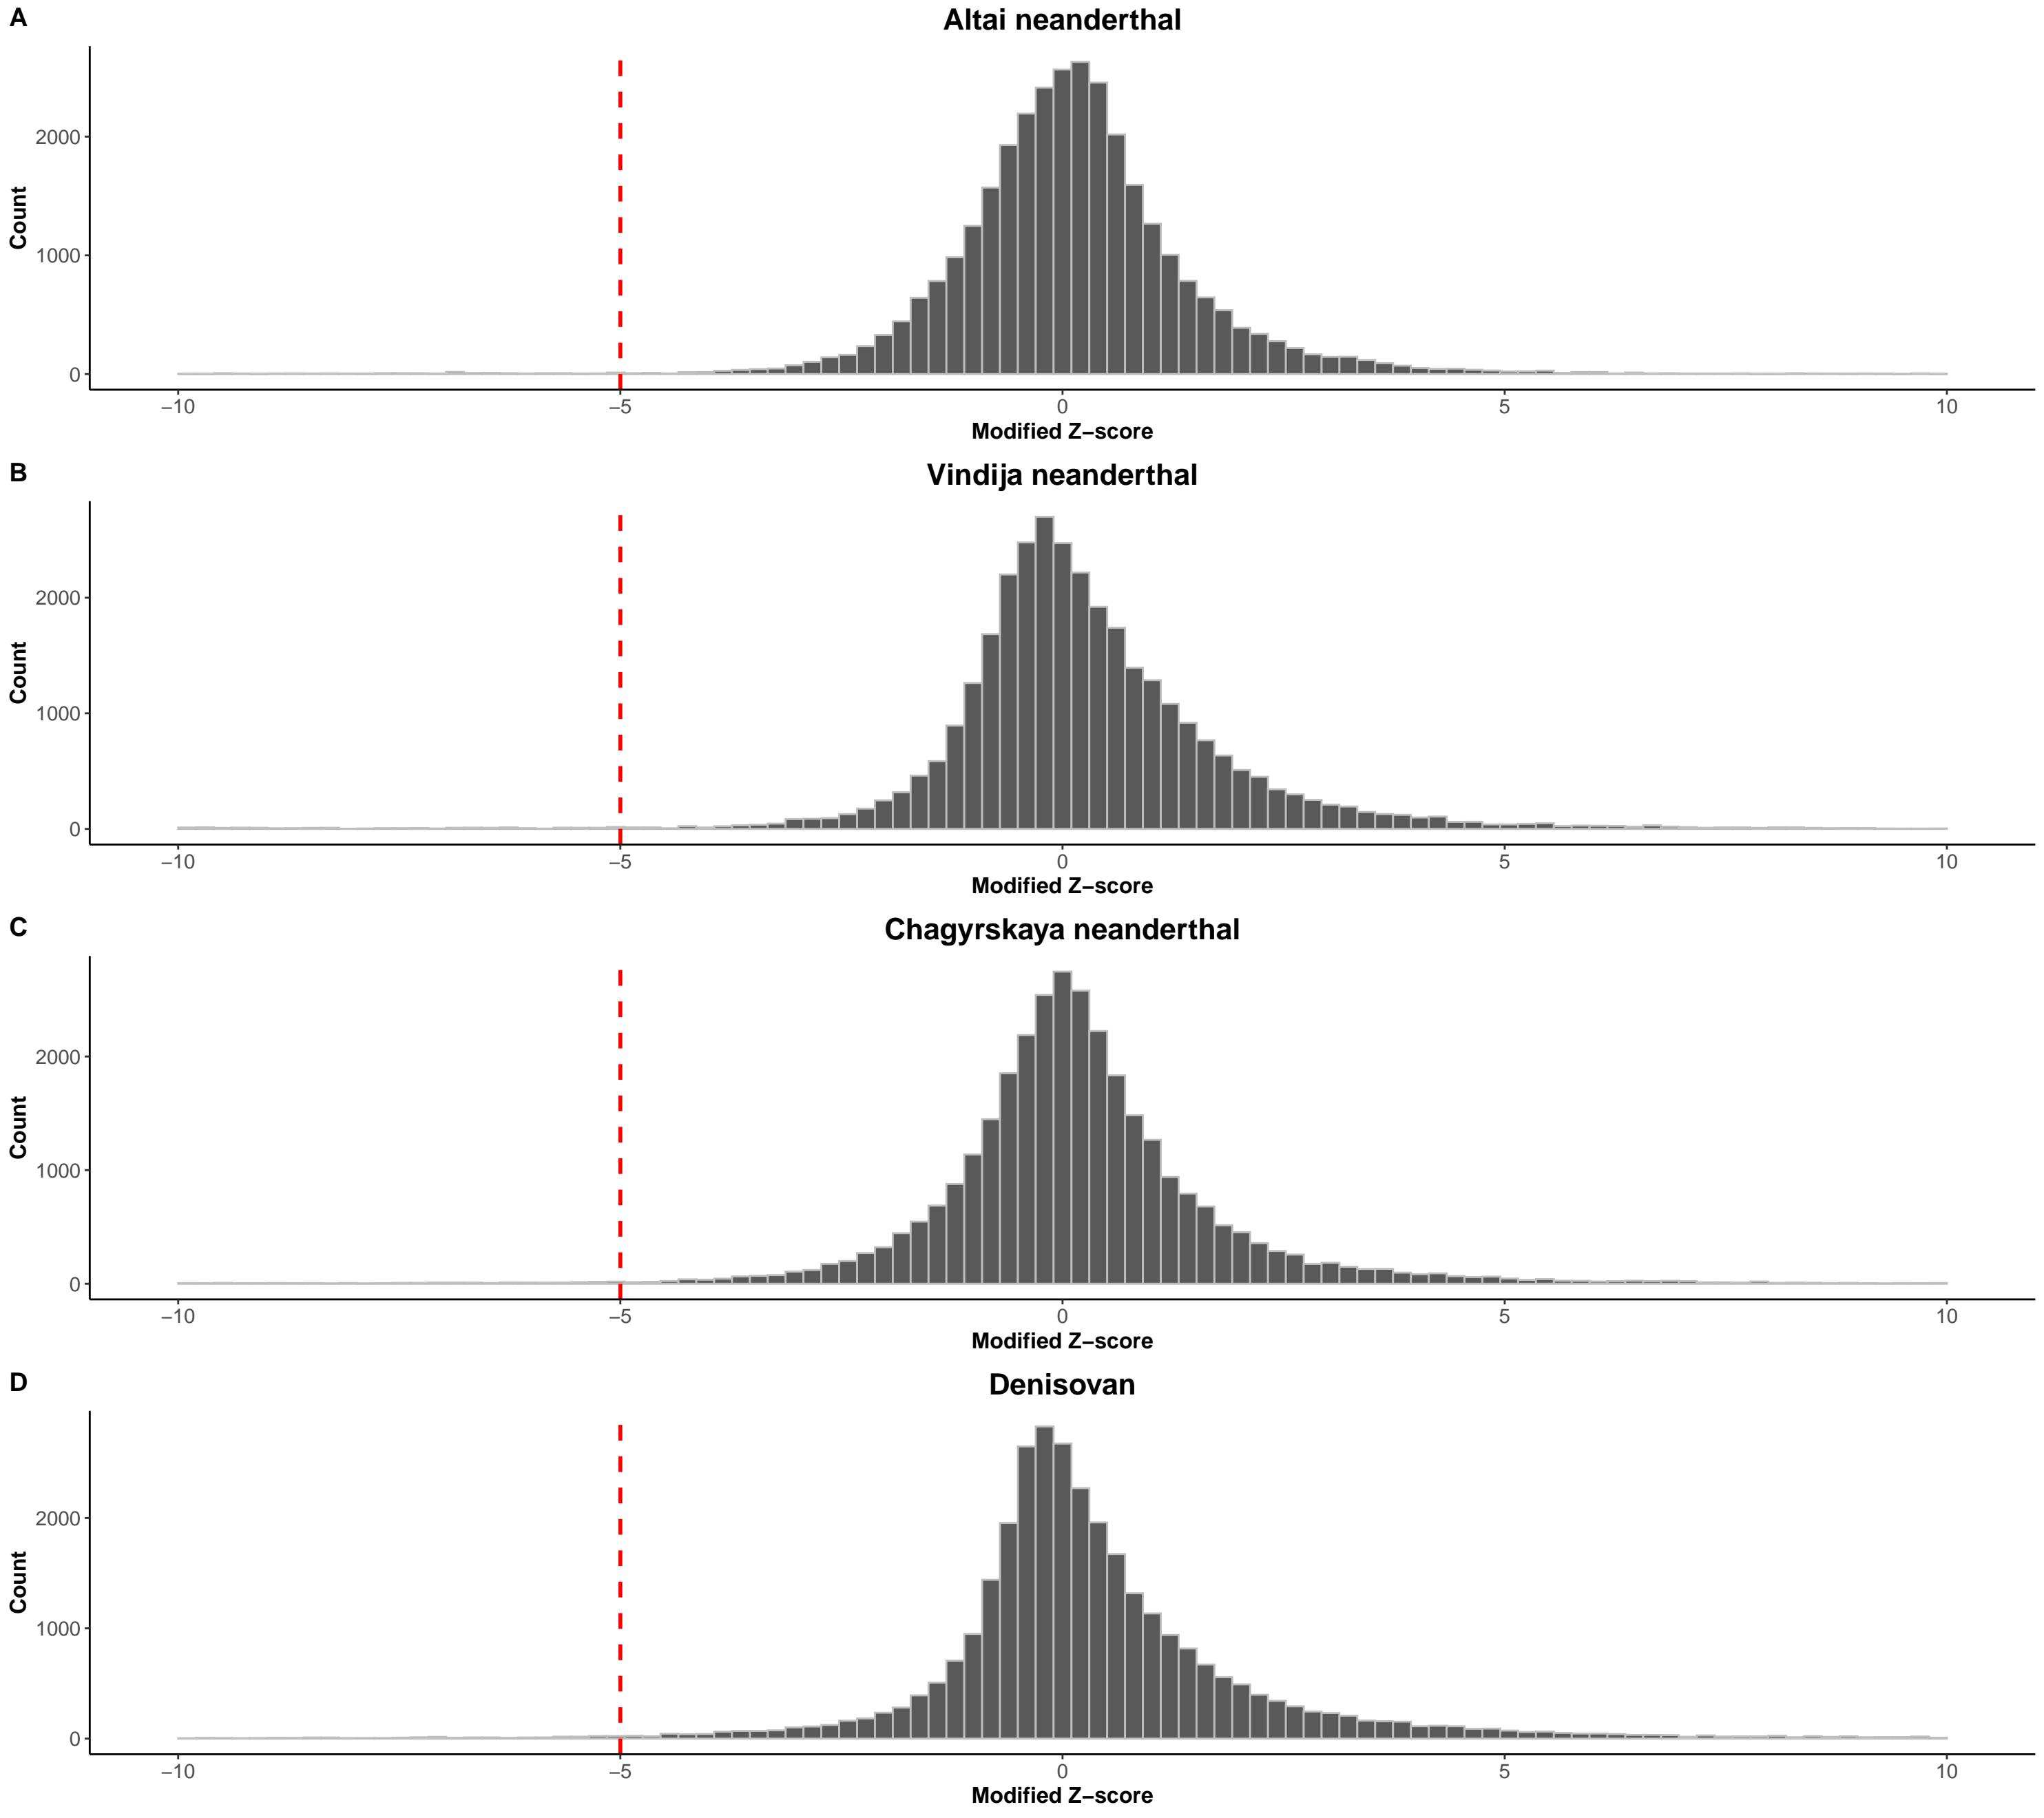

Supplement: supp [file elife-79111-supp-v1.zip]

# Simulation vs empirical sharing

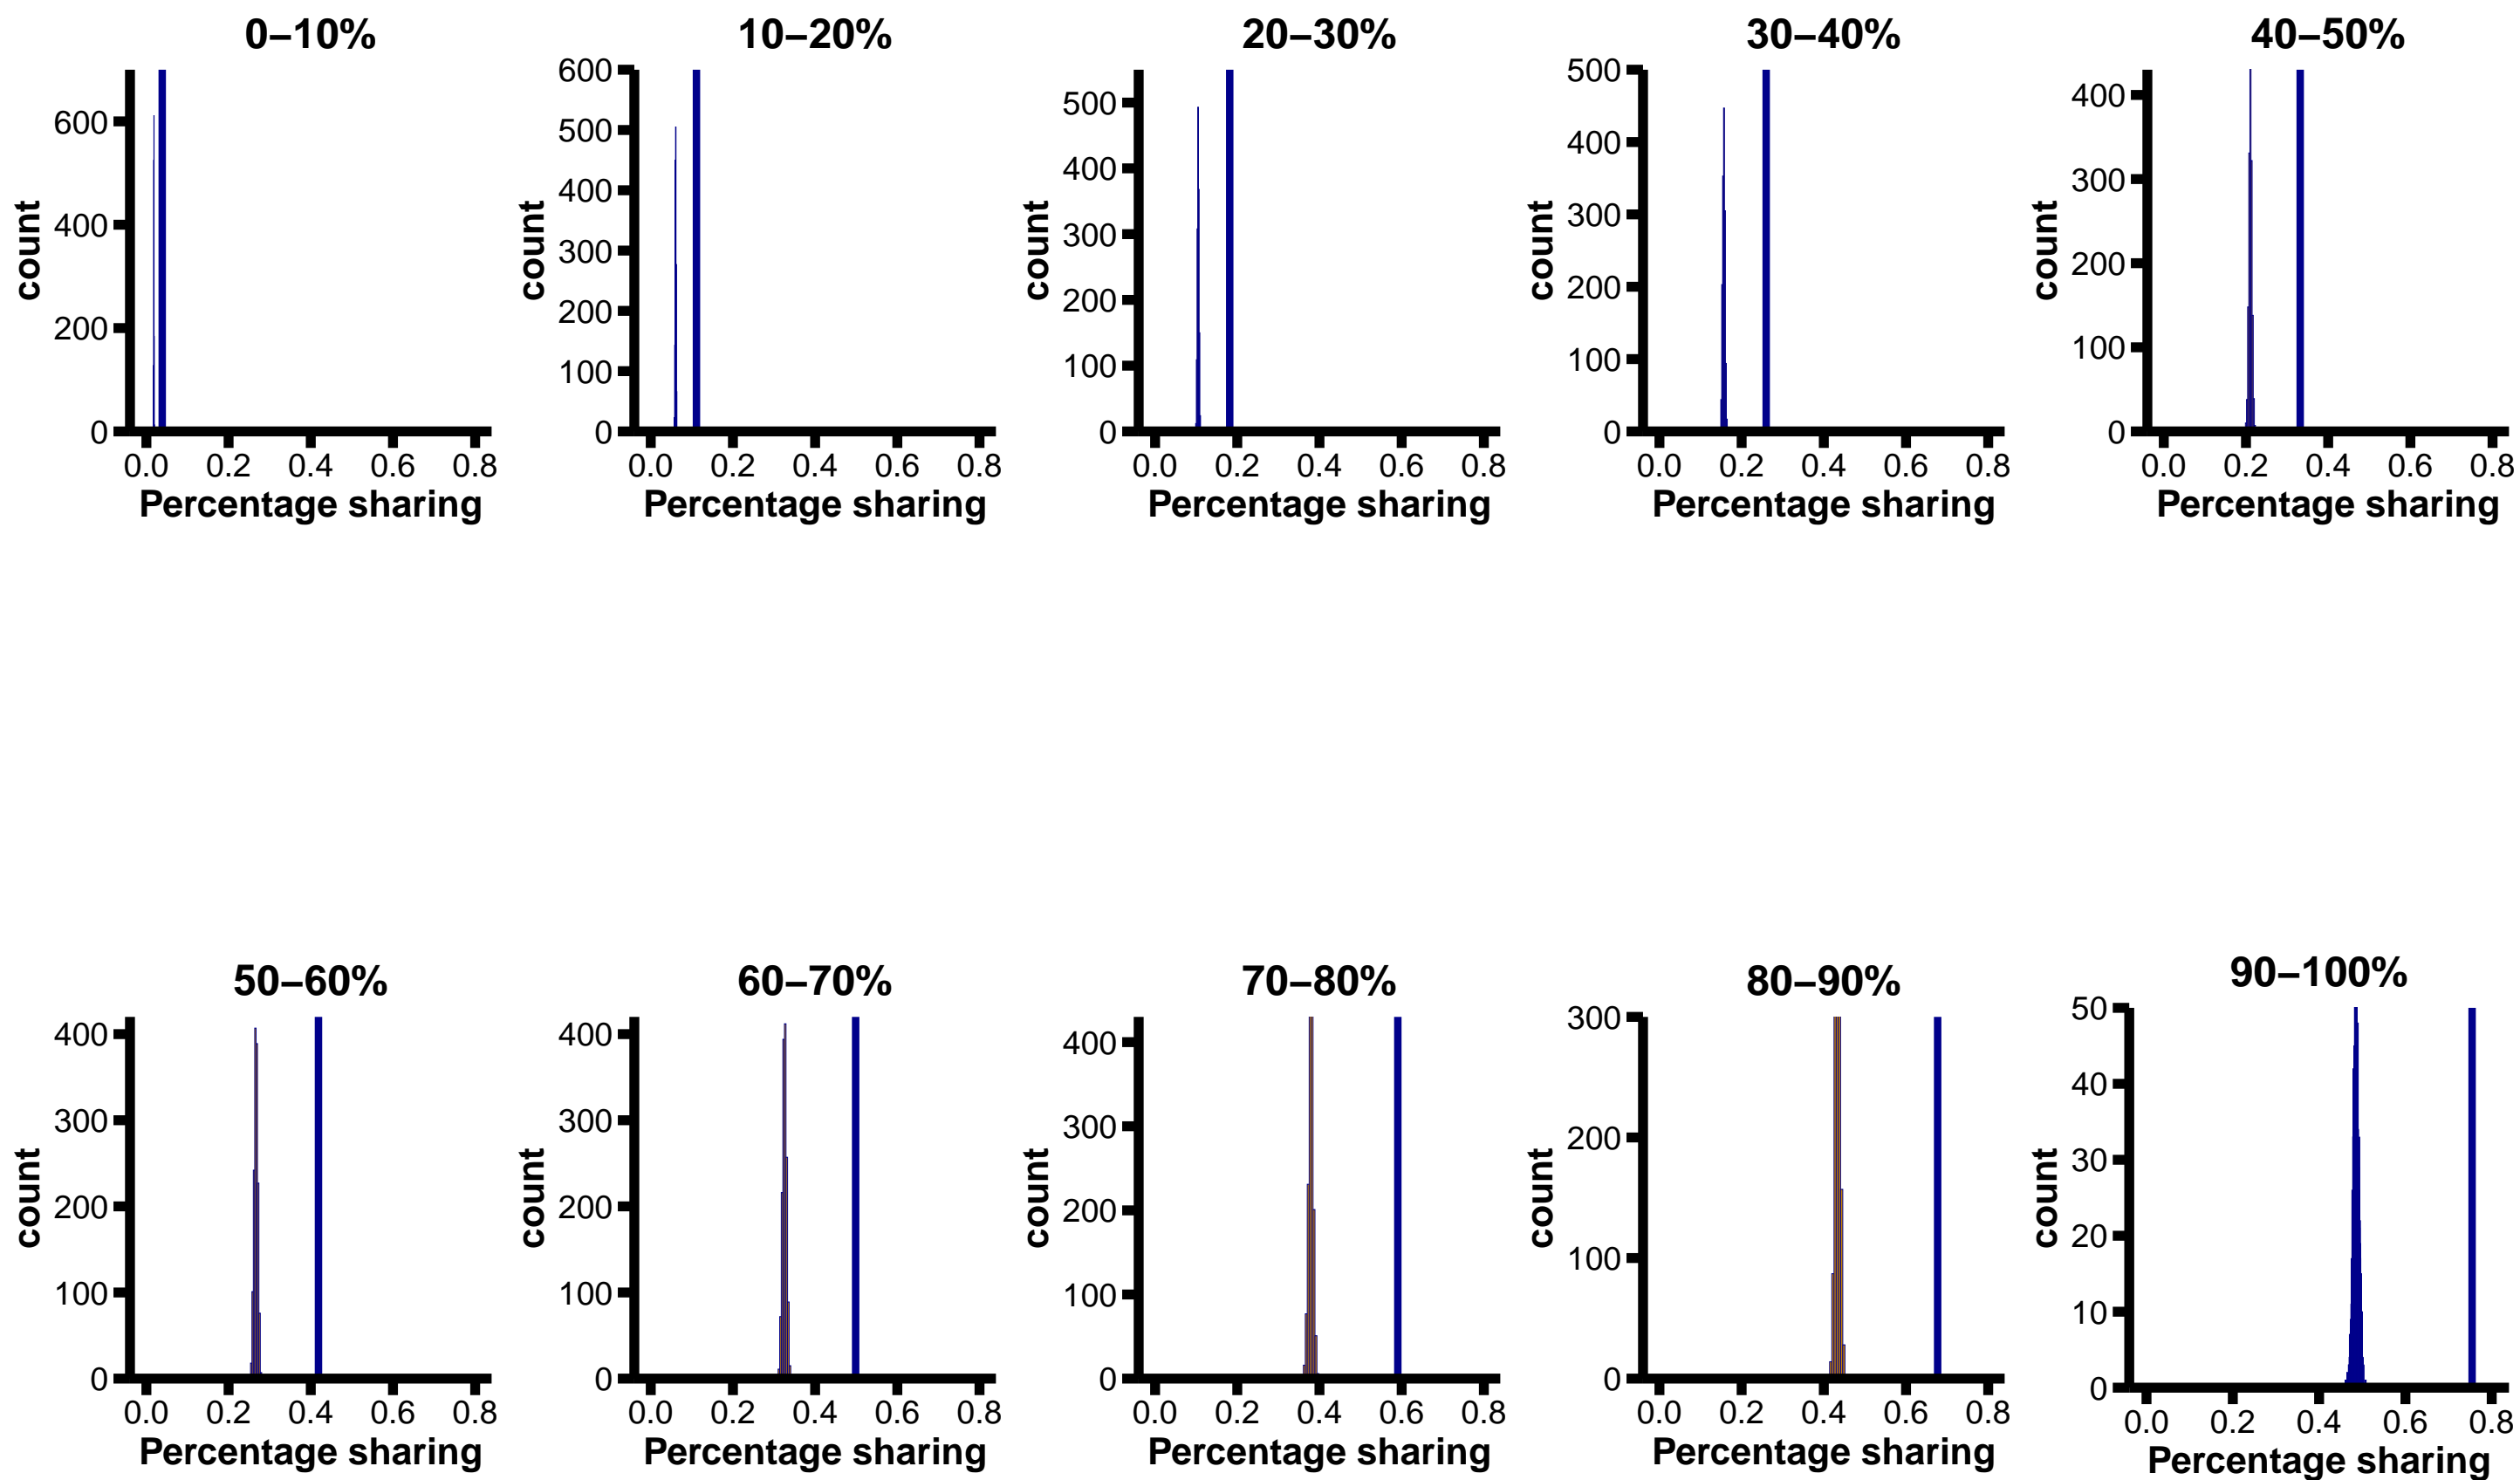

Supplement: supp [file elife-79111-supp-v1.zip]

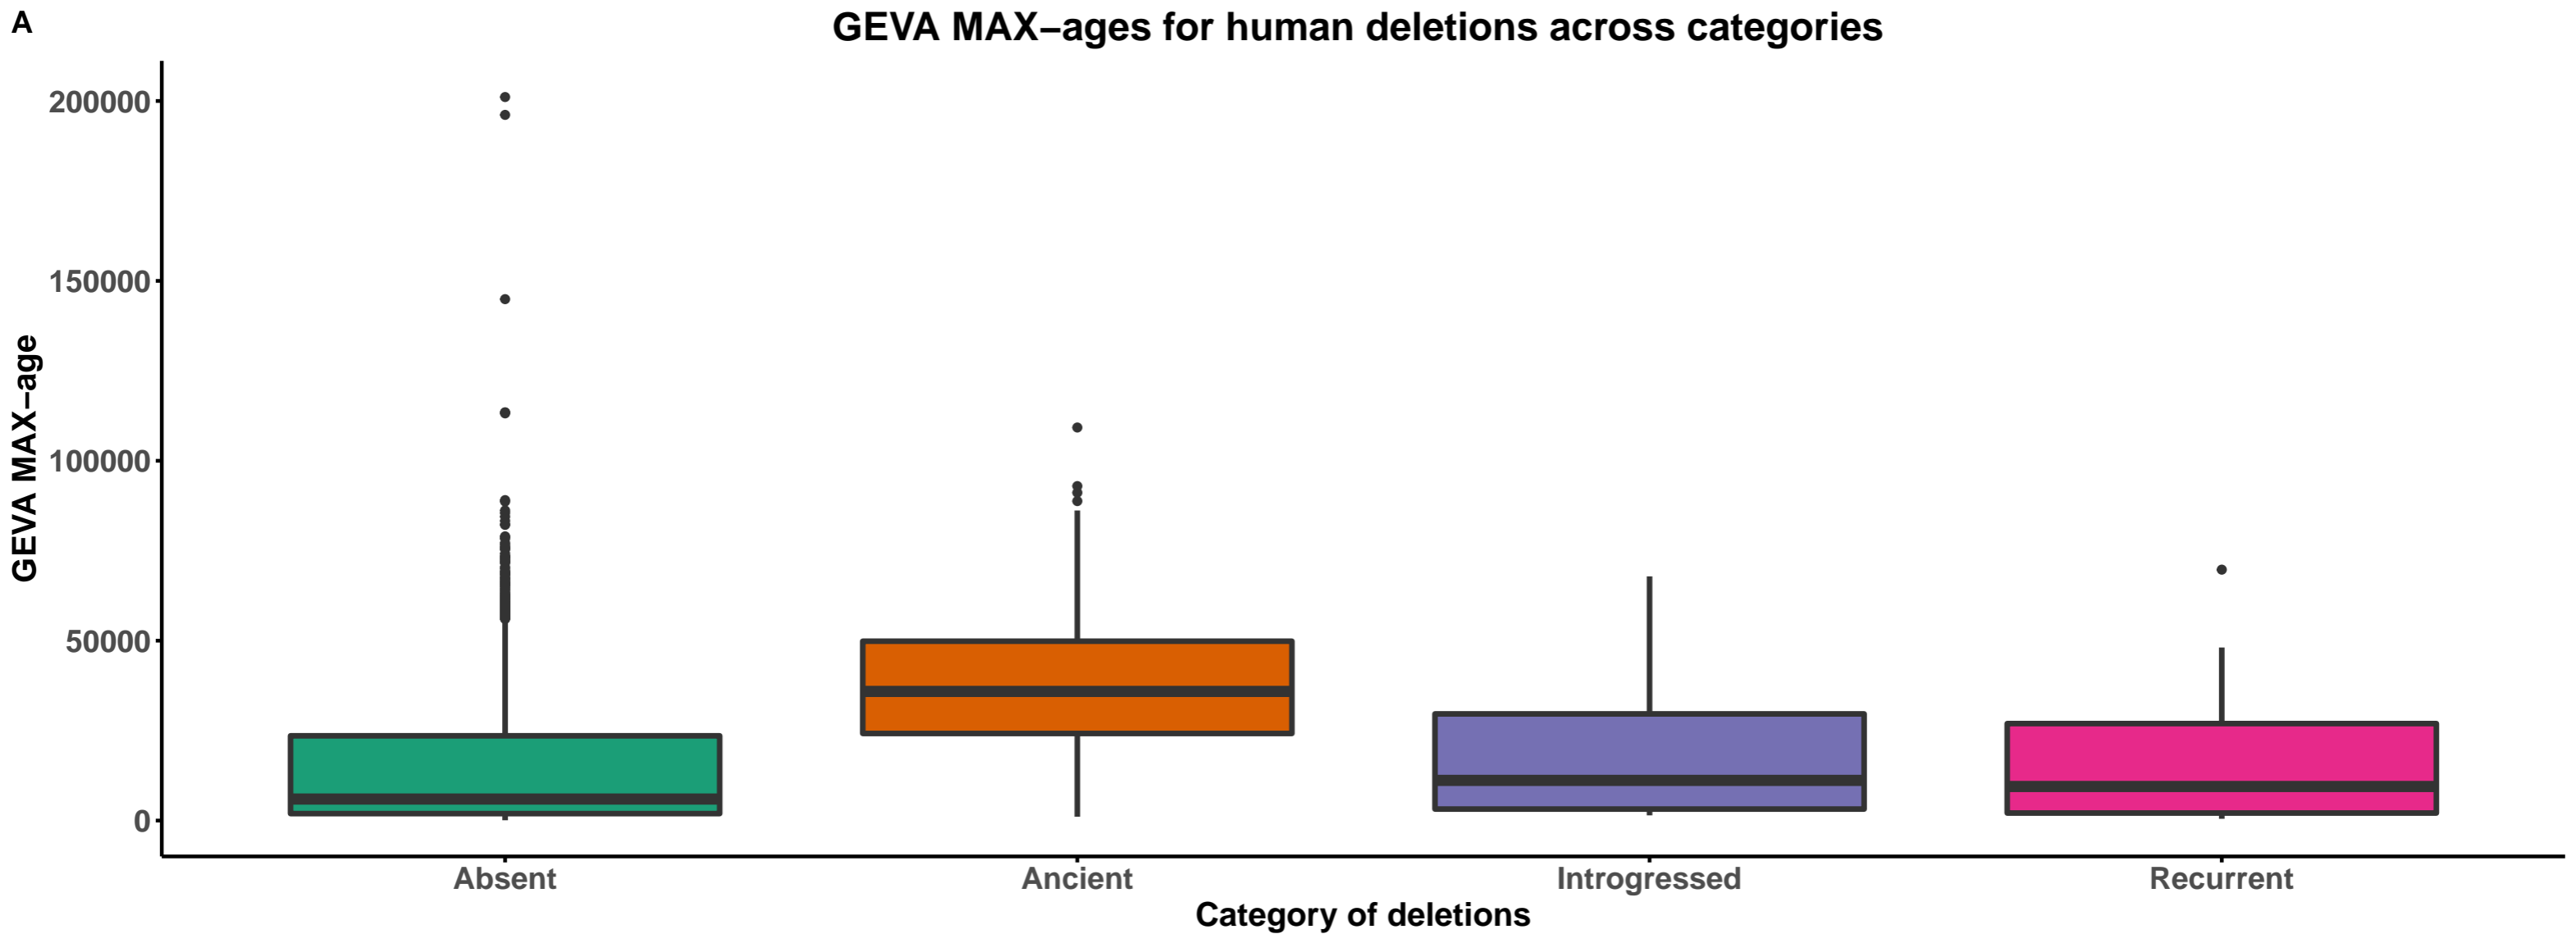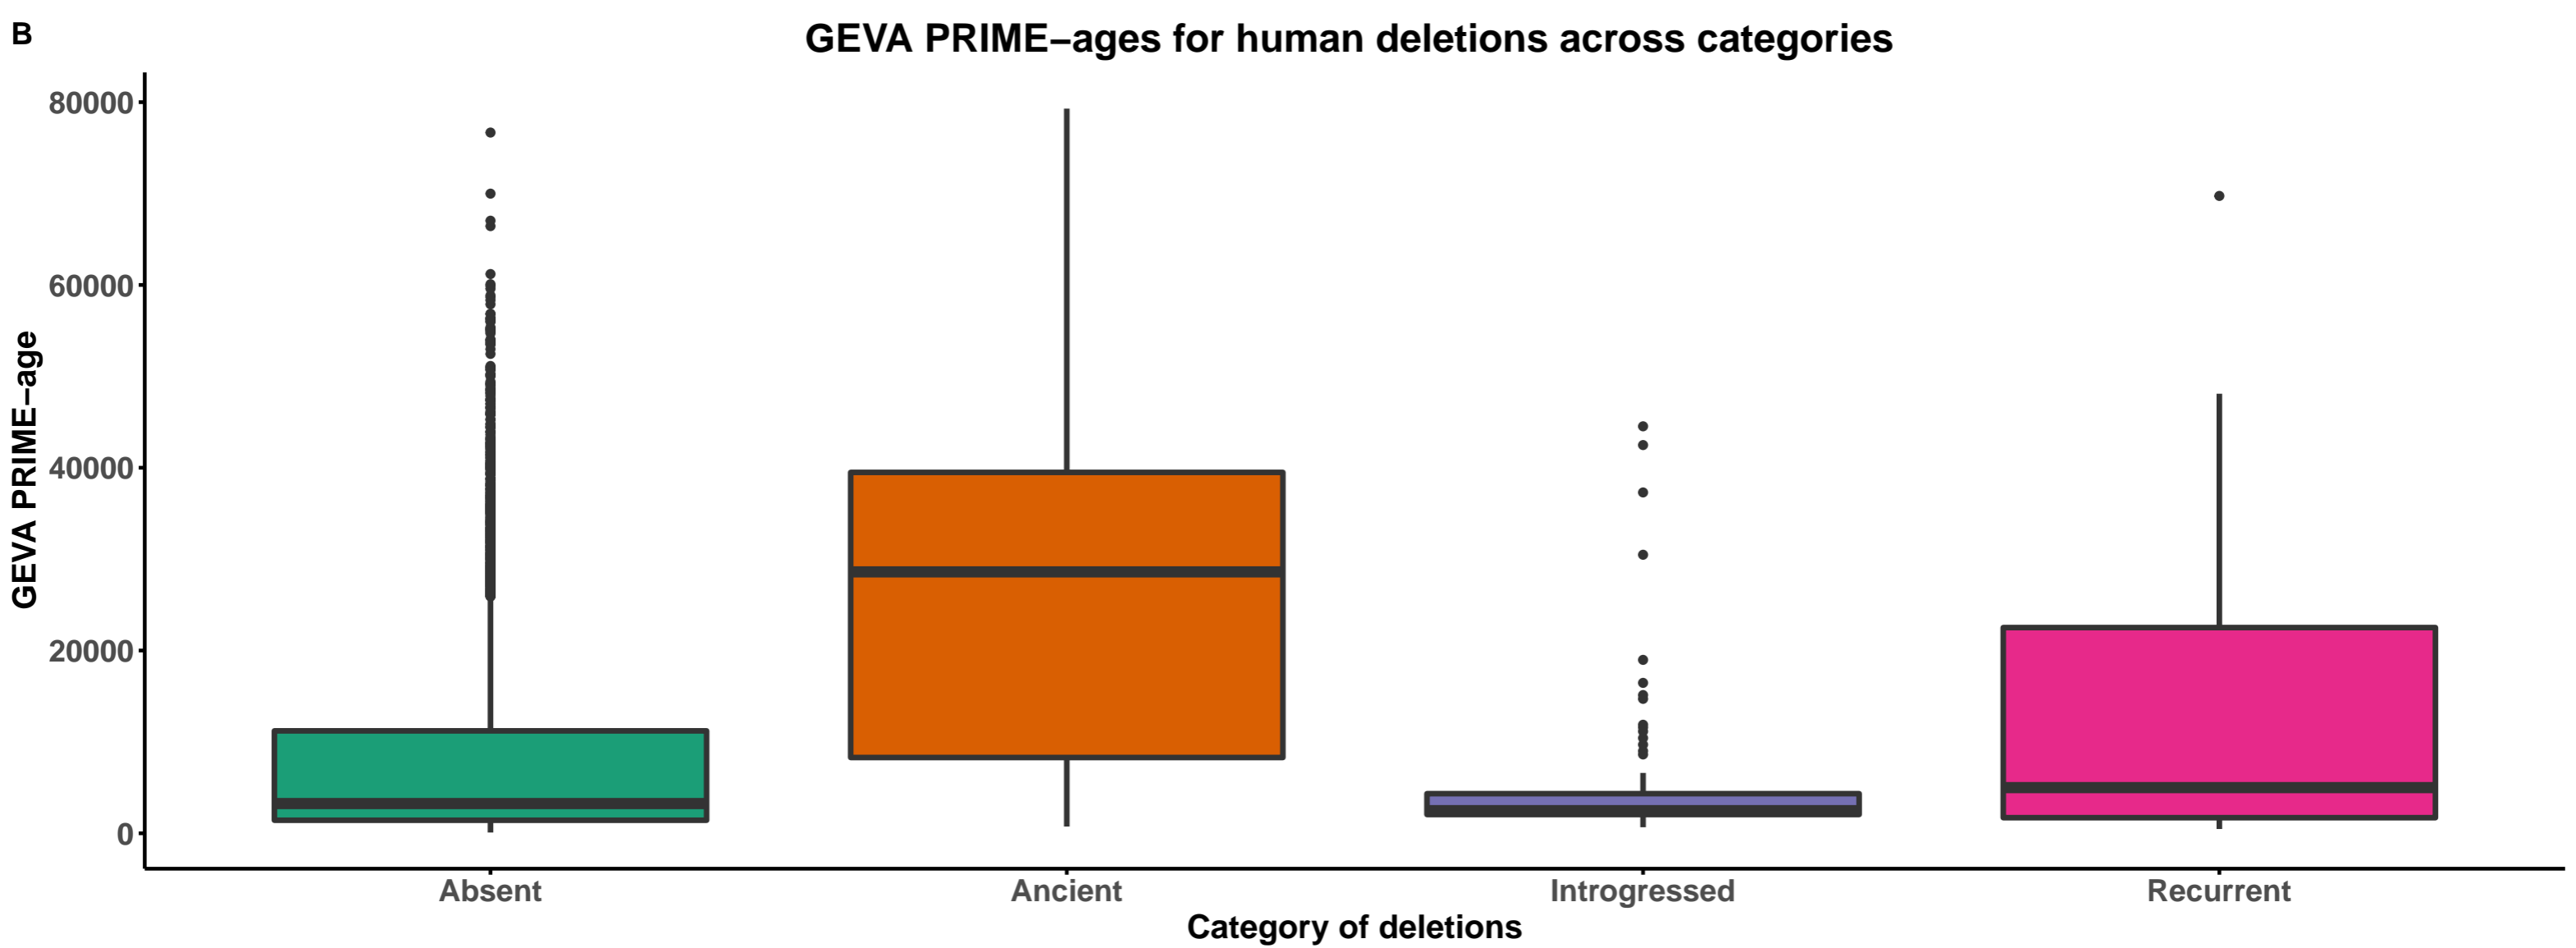

Supplement: supp [file elife-79111-supp-v1.zip]
